# Supplementary material for: Synthesis and biological evaluation of selective phosphonate-bearing 1,2,3-triazole-linked sialyltransferase inhibitors
Source: Royal Society of Chemistry journal article supplement (doi:10.1039/d1md00079a), 2021-01-01

## Supporting Information

# Synthesis and biological evaluation of selective phosphonate-bearing 1,2,3-triazole-linked sialyltransferase inhibitors

*Christopher Dobie,<sup>a</sup> Andrew P. Montgomery,<sup>a</sup> Rémi Szabo,<sup>a</sup> Haibo Yu,<sup>a,b</sup> and Danielle Skropeta<sup>\*a,b</sup>*

<sup>a</sup>Molecular Horizons and the School of Chemistry & Molecular Bioscience, Faculty of Science, Medicine and Health, University of Wollongong, Wollongong NSW 2522, Australia.

<sup>b</sup>Illawarra Health and Medical Research Institute, Wollongong, NSW 2522, Australia.

\*Corresponding Author: [skropeta@uow.edu.au](mailto:skropeta@uow.edu.au)

# Table of Contents

|                                                                                                                                              |     |
|----------------------------------------------------------------------------------------------------------------------------------------------|-----|
| <b>Additional Synthetic Methods</b>                                                                                                          | S3  |
| <b>Figure S1.</b> Non-linear regression analysis in Michaelis-Menten equation of CMP-Neu5Ac with recombinant hST6Gal I.                      | S9  |
| <b>Figure S2.</b> Non-linear regression analysis of velocity vs [CMP-NeuAc] with recombinant hST6Gal I at three <b>13a-s</b> concentrations. | S10 |
| <b>Figure S3.</b> Non-linear regression analysis of velocity vs [CMP-NeuAc] with recombinant hST6Gal I at three <b>13a-l</b> concentrations. | S11 |
| <b>Figure S4.</b> Non-linear regression analysis of velocity vs [CMP-NeuAc] with recombinant hST6Gal I at three <b>13c-s</b> concentrations. | S11 |
| <b>Figure S5.</b> Non-linear regression analysis of velocity vs [CMP-NeuAc] with recombinant hST6Gal I at three <b>13c-l</b> concentrations. | S12 |
| <b>Figure S6.</b> Non-linear regression analysis of velocity vs [CMP-NeuAc] with recombinant hST6Gal I at three <b>13f-s</b> concentrations. | S12 |
| <b>Figure S7.</b> Non-linear regression analysis of velocity vs [CMP-NeuAc] with recombinant hST6Gal I at three <b>13f-l</b> concentrations. | S13 |
| NMR data of novel compounds                                                                                                                  | S14 |

## Additional Synthesis

### Uridine Synthons:

#### *5'-O-Propargyl-2',3'-O-isopropylidenuridine (7)*

The acetonide protected 5'-O-propargyluridine compound (**7**) was synthesised by the method described by Sun *et al.*, and spectral data matched those reported.<sup>1</sup>

#### *5'-O-Propargyluridine (8)*

Protected propargyl uridine (**7**, 540 mg, 1.68 mmol) was dissolved in 10 mL 9:1 ACN/H<sub>2</sub>O, with indium triflate (5% mol equiv.), for 4 hours at reflux. After reaction, the mixture was evaporated under reduced pressure and the crude product purified by column chromatography (DCM:MeOH, 9:1), to give a white foam (436 mg, 92 %). R<sub>f</sub> 0.46 (Silica, DCM:MeOH, 9:1). Spectral data matched those previously reported.<sup>1</sup>

### Synthesis of $\alpha$ -hydroxyphosphonates:

All  $\alpha$ -hydroxyphosphonates (compounds **10a-g**) were synthesised as per the method of Montgomery *et al.*,<sup>2</sup> and **10a-d** and **10g** are characterised in that work. <sup>1</sup>H, <sup>13</sup>C, <sup>31</sup>P, and <sup>19</sup>F NMR spectra for **10e** and **10f** is provided in the supplementary information.

#### *Dibenzyl $\alpha$ -hydroxy(3-trifluoromethyl)benzylphosphonate (10e)*

From 3-trifluoromethylbenzaldehyde (300 mg, 1.72 mmol), and purified by column chromatography with a 9:1 Toluene/Acetone eluent to yield a white solid (752 mg, 78 %). R<sub>f</sub> 0.26 (Silica, Toluene/Acetone, 9:1). <sup>1</sup>H NMR (400 MHz, CDCl<sub>3</sub>): 7.71 (s, 1H), 7.59 (d, 1H, *J* = 7.8 Hz), 7.54 (d, 1H, *J* = 7.6 Hz), 7.42-7.36 (m, 1H), 7.32-7.20 (m, 10H), 5.10 (d, 1H, <sup>2</sup>*J*<sub>(H,P)</sub> = 10.1 Hz), 5.04-4.91 (m, 4H), 4.59-4.38 (bs, 1H). <sup>13</sup>C NMR (100 MHz, CDCl<sub>3</sub>): 137.4, 135.7 (d, <sup>2</sup>*J*<sub>(C,P)</sub> = 5.8 Hz), 130.4 (d, <sup>3</sup>*J*<sub>(C,F)</sub> = 5.6 Hz), 128.7, 128.6, 128.0, 127.0, 124.9, 124.0 (q, <sup>1</sup>*J*<sub>(C,F)</sub> = 270.6 Hz), 123.9, 70.5 (2 x d, <sup>1</sup>*J*<sub>(C,P)</sub> = 157.6 Hz), 69.0-68.5 (m). <sup>31</sup>P NMR (162 MHz, CDCl<sub>3</sub>): 21.1 <sup>19</sup>F NMR (376 MHz, CDCl<sub>3</sub>): -62.6 ESI-HRMS: *m/z* calculated for C<sub>22</sub>H<sub>20</sub>F<sub>3</sub>O<sub>4</sub>PNa [M + Na]<sup>+</sup> 459.0949, found 459.0967.

#### *Dibenzyl $\alpha$ -hydroxy(3-[1,1,2,2-tetrafluoroethoxy])benzyl phosphonate (10f)*

From 3-(1,1,2,2-tetrafluoroethoxy) benzaldehyde (861 mg, 4.34 mmol), and purified by column chromatography with a 9:1 Toluene/Acetone eluent to yield a white solid (1750 mg, 70 %). R<sub>f</sub> 0.85 (Silica, Toluene/Acetone, 9:1). <sup>1</sup>H NMR (400 MHz, CDCl<sub>3</sub>): 7.37-7.14 (m, 14H), 5.87 (tt, 1H, <sup>2</sup>*J*<sub>(H,F)</sub> = 53.0 Hz, <sup>3</sup>*J*<sub>(H,F)</sub> = 2.5 Hz), 5.05 (d, 1H, <sup>2</sup>*J*<sub>(H,P)</sub> = 10.5 Hz), 5.01-4.90 (m, 4H), 2.70-2.36 (bs, 1H). <sup>13</sup>C NMR (125 MHz, CDCl<sub>3</sub>): 148.2, 139.2, 135.9 (t, <sup>3</sup>*J*<sub>(C,P)</sub> = 5.6 Hz), 129.4, 128.5-127.9 (m), 125.3 (d, <sup>3</sup>*J*<sub>(C,P)</sub> = 5.6 Hz), 121.0 (d, <sup>4</sup>*J*<sub>(C,F)</sub> = 1.8 Hz), 120.5 (d, <sup>3</sup>*J*<sub>(C,P)</sub> = 5.6 Hz), 116.5 (tt, <sup>1</sup>*J*<sub>(C,F)</sub> = 270.3 Hz, <sup>2</sup>*J*<sub>(C,F)</sub> = 27.8 Hz), 107.7 (tt, <sup>1</sup>*J*<sub>(C,F)</sub> = 249.9 Hz, <sup>2</sup>*J*<sub>(C,F)</sub> = 41.6 Hz), 70.3 (d, <sup>1</sup>*J*<sub>(C,P)</sub> = 160.1 Hz), 68.9 (d, <sup>2</sup>*J*<sub>(C,P)</sub> =

7.4 Hz), 68.5 (d,  $^2J_{(C,P)} = 7.5$  Hz).  **$^{31}\text{P}$  NMR (162 MHz,  $\text{CDCl}_3$ ):** 21.2  **$^{19}\text{F}$  NMR (376 MHz,  $\text{CDCl}_3$ ):** -88.0 (t,  $J = 5.4$  Hz), -136.7 (t,  $J = 5.4$  Hz). **ESI-HRMS:**  $m/z$  calculated for  $\text{C}_{22}\text{H}_{20}\text{F}_3\text{O}_4\text{PNa}$   $[\text{M} + \text{H}]^+$  485.1141, found 485.1143.

### Synthesis of $\alpha$ -azidophosphonates:

Dibenzyl  $\alpha$ -hydroxyphosphonate (**10a-g**, 1 equiv.) and triphenylphosphine (3 equiv.), were dissolved in dry THF under an inert atmosphere at 0 °C. Freshly prepared  $\text{HN}_3$  (30 mL) was added, along with diisopropylazodicarboxylate (DIAD, 3 equiv.) dropwise, and the reaction was allowed to warm to room temperature. Upon completion (judged by TLC), the reaction mixture was taken up in  $\text{CH}_2\text{Cl}_2$  (10 mL), washed with saturated  $\text{NaHCO}_3$  solution (3 x 5 mL) and brine (3 x 5 mL). The organic phase was separated and dried with anhydrous  $\text{MgSO}_4$  and evaporated, with the resultant product purified by column chromatography. The  $\alpha$ -azidophosphonates proved difficult to purify, as the hydrazine by-product of DIAD seemed to 'stick' to the desired product during column chromatography, and would not readily precipitate when the crude product was taken up in a non-polar solvent such as hexane. This was not deemed an issue, as the hydrazine did not impact the proceeding click reaction and so it was not necessary for the  $\alpha$ -azidophosphonate to be completely purified.  $^1\text{H}$ ,  $^{13}\text{C}$ ,  $^{31}\text{P}$ , and  $^{19}\text{F}$  NMR spectra for these compounds is provided.

#### *Dibenzyl $\alpha$ -azido-3-phenoxybenzylphosphonate (11a)*

From **10a** (1.25 g, 2.71 mmol): purified by column chromatography using a Toluene/Acetone (1:1) eluent, to yield a white solid (1.095 g, 83.7%).  $R_f$  0.48 (Silica, Toluene/Acetone, 1:1).  **$^1\text{H}$  NMR (400 MHz,  $\text{CDCl}_3$ ):** 7.23-7.18 (m, 12H), 7.18-7.13 (m, 2H), 7.08 (s, 1H), 7.00 (t,  $J = 7.3$  Hz, 1H), 6.92 (d,  $J = 7.7$  Hz, 3H), 4.97-4.82 (m, 4H), 4.67 (d,  $^2J_{(H,P)} = 16.0$  Hz, 1H).  **$^{13}\text{C}$  NMR (100 MHz,  $\text{CDCl}_3$ ):** 157.6, 156.8, 135.9, 135.8, 134.3, 130.2, 129.9, 128.6, 128.2, 123.7, 123.2, 119.2, 118.7, 68.8, 61.3 (d,  $^2J_{(C,P)} = 157.2$  Hz).  **$^{31}\text{P}$  NMR (162 MHz,  $\text{CDCl}_3$ ):** 19.2. **ESI-HRMS:**  $m/z$  calculated for  $\text{C}_{27}\text{H}_{24}\text{N}_3\text{O}_4\text{PNa}$   $[\text{M} + \text{Na}]^+$ : 508.1406, found 508.1402.

#### *Dibenzyl $\alpha$ -azido-3-cyclopentoxybenzylphosphonate (11b)*

From **10b** (232 mg, 0.512 mmol): purified by column chromatography using a DCM/EtOAc (99:1) eluent, to give a white solid (195 mg, 80%).  $R_f$  0.68 (Silica, DCM:EtOAc, 99:1).  **$^1\text{H}$  NMR (400 MHz,  $\text{CDCl}_3$ ):** 7.35-7.18 (m, 11H), 6.95-6.92 (m, 2H), 6.87-6.84 (m, 1H, H4), 5.04-4.82 (m, 4H), 4.68 (d, 1H,  $J = 16.8$  Hz), 4.65 (m, 1H), 1.89-1.70 (m, 6H), 1.63-1.53 (m, 2H).  **$^{13}\text{C}$  NMR (100 MHz,  $\text{CDCl}_3$ ):** 158.3 (d,  $J = 2.4$  Hz), 135.8 (d,  $J = 5.8$  Hz), 135.7 (d,  $J = 5.9$  Hz), 133.1 (d,  $J = 3.6$  Hz), 129.7 (d,  $J = 1.5$  Hz), 128.6, 128.5, 128.09, 128.05, 120.3 (d,  $J = 6.7$  Hz), 116.5 (d,  $J = 2.6$  Hz), 115.0 (d,  $J = 6.0$  Hz), 79.2, 68.83 (d,  $J = 6.8$  Hz), 68.79 (d,  $J = 7.2$  Hz), 61.8 (d,  $J = 158.7$  Hz), 32.7, 24.0.  **$^{31}\text{P}$  NMR (162 MHz,  $\text{CDCl}_3$ ):** 19.3. **ESI-HRMS:**  $m/z$  calculated for  $\text{C}_{26}\text{H}_{28}\text{N}_3\text{O}_4\text{PNa}$   $[\text{M} + \text{Na}]^+$ : 500.1716, found 500.1709.

***Dibenzyl  $\alpha$ -azido-3-phenoxy-4-fluorobenzylphosphonate (11c)***

From **10c** (179 mg, 0.375 mmol): purified by column chromatography using a DCM/EtOAc (99:1) eluent, to give a white solid (141 mg, 75%).  $R_f$  0.83 (Silica, DCM:EtOAc, 99:1).  **$^1\text{H}$  NMR (500 MHz,  $\text{CDCl}_3$ ):** 7.31-7.18 (m, 12H), 7.12-7.05 (m, 4H), 6.92-6.90 (m, 2H), 5.01-4.88 (m, 4H), 4.61 (d, 1H,  $J_{(H,P)} = 16.3$  Hz).  **$^{13}\text{C}$  NMR (125 MHz,  $\text{CDCl}_3$ ):** 156.8, 154.3 (d,  $J = 251.1$  Hz), 144.0 (dd,  $J = 12.1$ , 2.8 Hz), 135.5 (2 x d,  $J = 5.8$  Hz), 129.8, 128.9 (d,  $J = 3.9$  Hz), 128.7, 128.6 (d,  $J = 3.2$  Hz), 128.13, 128.08, 126.4 (d,  $J = 6.1$  Hz), 124.5 (2 x d,  $J = 6.4$  Hz), 123.5, 121.4 (d,  $J = 4.5$  Hz), 117.5, 117.3 (dd,  $J = 19.2$ , 2.2 Hz), 68.9 (2 x d,  $J = 6.8$  Hz), 60.9 (d,  $J = 159.2$  Hz).  **$^{31}\text{P}$  NMR (202 MHz,  $\text{CDCl}_3$ ):** 18.8.  **$^{19}\text{F}$  NMR (376 MHz,  $\text{CDCl}_3$ ):** -131.7. **ESI-HRMS:**  $m/z$  calculated for  $\text{C}_{27}\text{H}_{23}\text{FN}_3\text{O}_4\text{PNa}$  [ $\text{M} + \text{Na}$ ] $^+$ : 526.1308, found 526.1321.

***Dibenzyl  $\alpha$ -azido-4-fluorobenzylphosphonate (11d)***

From **10d** (400 mg, 1.04 mmol): purified by column chromatography using a DCM/EtOAc (99:1) eluent, to give a white solid (379 mg, 89%).  $R_f$  0.68 (Silica, DCM:EtOAc, 99:1).  **$^1\text{H}$  NMR (500 MHz,  $\text{CDCl}_3$ ):** 7.36-7.27 (m, 10H), 7.21-7.19 (m, 2H), 7.00 (dd,  $^3J_{(H,F)} = 8.5$  Hz, 2H), 5.04-4.86 (m, 4H), 4.69 (d, 1H,  $J_{(H,P)} = 16.3$  Hz).  **$^{13}\text{C}$  NMR (125 MHz,  $\text{CDCl}_3$ ):** 162.9 (dd,  $^1J_{(C,F)} = 248.0$  Hz,  $^5J_{(C,P)} = 3.0$  Hz), 135.6 (2 x d,  $^2J_{(C,P)} = 18.4$  Hz), 130.2 (dd,  $^3J_{(C,P)} = 8.3$  Hz,  $^3J_{(C,F)} = 6.4$  Hz), 128.6 (m), 128.2, 128.1, 127.8 (t,  $^3J_{(C,P)} = 3.4$  Hz), 115.8 (dd,  $^2J_{(C,F)} = 22.0$  Hz), 68.9 (m), 61.1 (d,  $^1J_{(C,P)} = 160.9$  Hz).  **$^{31}\text{P}$  NMR (202 MHz,  $\text{CDCl}_3$ ):** 19.2.  **$^{19}\text{F}$  NMR (376 MHz,  $\text{CDCl}_3$ ):** -112.3 (2 x s). **ESI-HRMS:**  $m/z$  calculated for  $\text{C}_{21}\text{H}_{19}\text{FN}_3\text{O}_3\text{PNa}$  [ $\text{M} + \text{Na}$ ] $^+$ : 434.1046, found 434.1066.

***Dibenzyl  $\alpha$ -azido-3-trifluoromethylbenzylphosphonate (11e)***

From **10e** (600 mg, 1.38 mmol): purified by column chromatography using a DCM/EtOAc (99:1) eluent, to give a white solid (608 mg, 96%).  $R_f$  0.77 (Silica, DCM:EtOAc, 99:1).  **$^1\text{H}$  NMR (400 MHz,  $\text{CDCl}_3$ ):** 7.61 (bs, 1H), 7.57 (bs, 1H), 7.55 (bs, 1H), 7.41 (t, 1H,  $J = 7.8$  Hz), 7.20-7.33 (m, 10H), 4.94-5.03 (m, 4H), 4.79 (d, 1H,  $J = 16.5$  Hz).  **$^{13}\text{C}$  NMR (100 MHz,  $\text{CDCl}_3$ ):** 135.4-135.6 (m), 133.5 (d,  $J = 3.7$  Hz), 131.6 (d,  $J = 4.4$  Hz), 131.0 (dq,  $J = 33.3$ , 2.4 Hz), 129.1 (d,  $J = 2.2$  Hz), 128.8, 128.69, 128.67, 128.2, 125.0 (quint,  $J = 3.5$  Hz), 125.0 (sext,  $J = 3.5$  Hz), 123.8 (q,  $J = 272.7$  Hz), 69.1, 69.0, 61.4 (d,  $J = 157.7$  Hz).  **$^{31}\text{P}$  NMR (162 MHz,  $\text{CDCl}_3$ ):** 18.5.  **$^{19}\text{F}$  NMR (376 MHz,  $\text{CDCl}_3$ ):** -62.6. **ESI-HRMS:**  $m/z$  calculated for  $\text{C}_{22}\text{H}_{19}\text{F}_3\text{N}_3\text{O}_3\text{PNa}$  [ $\text{M} + \text{Na}$ ] $^+$ : 484.1014, found 484.1037.

***Dibenzyl  $\alpha$ -azido-3-(1,1,2,2-tetrafluoroethoxy)benzyl phosphonate (11f)***

From **10f** (331 mg, 0.840 mmol): purified by column chromatography using a DCM/EtOAc (4:1) eluent, to give a white solid (289 mg, 83%).  $R_f$  0.95 (Silica, DCM:EtOAc, 4:1).  **$^1\text{H}$  NMR (500 MHz,  $\text{CDCl}_3$ ):** 7.36-7.20 (m, 14H), 5.89 (tt, 1H,  $J = 53.1$ , 2.8 Hz), 5.02-4.90 (m, 4H), 4.73 (d, 1H,  $J = 16.5$  Hz).  **$^{13}\text{C}$  NMR (125 MHz,  $\text{CDCl}_3$ ):** 148.9, 135.6 (d,  $J = 6.1$  Hz), 135.5 (d,  $J = 6.2$  Hz), 134.3 (d,  $J = 4.6$  Hz), 130.0 (d,  $J = 1.8$  Hz), 128.7, 128.64, 128.62, 128.19, 128.17, 126.3 (d,  $J = 6.3$  Hz), 121.9 (d,  $J = 2.4$  Hz), 121.5 (d,  $J = 6.2$  Hz), 116.5 (tt,  $J = 272.5$ , 28.7 Hz), 107.6 (tt,  $J = 252.0$ , 41.2 Hz), 69.1 (m), 61.3

(d,  $J = 158.7$  Hz).  **$^{31}\text{P}$  NMR (162 MHz,  $\text{CDCl}_3$ ):** 18.6.  **$^{19}\text{F}$  NMR (376 MHz,  $\text{CDCl}_3$ ):** -88.1 (t,  $J = 6.8$  Hz), -136.7 (dt,  $J = 53.0, 5.7$  Hz). **ESI-HRMS:**  $m/z$  calculated for  $\text{C}_{23}\text{H}_{20}\text{F}_4\text{N}_3\text{O}_4\text{PNa}$   $[\text{M} + \text{Na}]^+$ : 532.1025, found 532.1035.

***Dibenzyl  $\alpha$ -azido-(3-benzothiophene)methylphosphonate (11g)***

From **10g** (460 mg, 1.08 mmol): purified by column chromatography, with a Hexane/EtOAc (1:1) eluent. This afforded a clear oil (390 mg, 80 %).  $R_f$  0.73 (Silica, Hexane/EtOAc, 1:1).  **$^1\text{H}$  NMR (500 MHz,  $\text{CDCl}_3$ ):** 7.86-7.75 (m, 3H), 7.38-7.35 (m, 2H), 7.34-7.29 (m, 5H), 7.27-7.21 (m, 3H), 7.14-7.11 (m, 2H), 5.01 (d, 1H,  $J = 16.8$  Hz), 5.13-4.79 (m, 4H)  **$^{13}\text{C}$  NMR (125 MHz,  $\text{CDCl}_3$ ):** 140.0, 137.3 (2 x s), 135.6 (2 x s), 135.4 (2 x s), 128.56, 128.54, 128.48, 128.43, 128.1, 128.0, 127.5 (d,  $J = 7.5$  Hz), 126.1, 124.9, 124.5, 122.7, 121.9, 68.9-68.8 (m), 55.4 (d,  $J = 162.7$  Hz)  **$^{31}\text{P}$  NMR (202 MHz,  $\text{CDCl}_3$ ):** 19.1. **ESI-HRMS:**  $m/z$  calculated for  $\text{C}_{23}\text{H}_{20}\text{N}_3\text{O}_3\text{PSNa}$   $[\text{M} + \text{Na}]^+$ : 472.08552, found 472.08550.

**CuAAC ‘click’ coupling to form 1,2,3-triazoles:**

An  $\alpha$ -azidophosphonate (**11a-g**, 1 equiv.), **8** (1.2 equiv.),  $\text{Cu}(\text{OAc})_2$  (0.25 equiv.), and sodium ascorbate (0.5 equiv.) were suspended in a mixture of THF and water (1:1) and stirred at room temperature until starting material disappeared (4-12 hours). Upon completion (judged by TLC), the reaction mixture was concentrated under reduced pressure and extracted with EtOAc. The organic layer washed with brine, dried with anhydrous  $\text{MgSO}_4$ , filtered and evaporated, with the resultant product purified by column chromatography.

***5'-O-[1-(Dibenzoxyphosphoryl-3-phenoxyphenylmethyl)-1,2,3-triazol-4-yl]methyluridine (12a)***

From **11a** (150 mg, 0.309 mmol): purified by column chromatography to give white solid (100 mg, 51%).  $R_f$  0.64 (DCM/MeOH, 9:1).  **$^1\text{H}$  NMR (400 MHz,  $\text{CDCl}_3$ ):** 9.18 (2 x bs, 1H), 8.04 (2 x s, 1H), 7.73 (2 x d,  $J = 8.2$  Hz), 7.33-7.21 (m, 10H), 7.16-7.09 (m, 6H), 7.00-6.92 (m, 3H), 6.13 (2 x d, 1H,  $J = 21.6$  Hz), 5.80 (2 x d, 1H,  $J = 2.3$  Hz), 5.63 (2 x d, 1H,  $J = 8.1$  Hz), 4.97-4.80 (m, 4H), 4.69-4.59 (m, 2H), 4.39 (bs, 1H), 4.20-4.15 (m, 3H), 3.86-3.51 (m, 3H).  **$^{13}\text{C}$  NMR (100 MHz,  $\text{CDCl}_3$ ):** 163.3, 158.0 (2 x s), 156.3 (2 x s), 151.0, 144.6, 140.4 (2 x s), 135.1 (m), 133.6 (2 x s), 130.6 (2 x s), 129.9 (2 x s), 128.8, 128.7, 128.1 (m), 123.9 (2 x s), 123.0 (2 x s), 119.3 (2 x s), 118.8 (2 x s), 102.3 (2 x s), 90.7 (2 x s), 83.8 (2 x s), 75.4 (2 x s), 70.5 (2 x s), 69.7 (2 x s), 69.2 (2 x s), 69.0 (2 x s), 64.4 (2 x s), 61.7 (d,  $J = 159.1$  Hz).  **$^{31}\text{P}$  NMR (162 MHz,  $\text{CDCl}_3$ ):** 16.4. **ESI-HRMS:**  $m/z$  calculated for  $\text{C}_{39}\text{H}_{38}\text{N}_5\text{O}_{10}\text{PNa}$   $[\text{M} + \text{Na}]^+$ : 790.2271, found 790.2254.

***5'-O-[1-(Dibenzoxyphosphoryl-3-cyclopentoxyphenylmethyl)-1,2,3-triazol-4-yl]methyluridine (12b)***

From **11b** (156 mg, 0.326 mmol): purified by column chromatography with a 9:1 DCM/MeOH eluent to afford a white foam (129 mg, 52 %).  $R_f$  0.68 (DCM/MeOH, 9:1).  **$^1\text{H}$  NMR (500 MHz,  $\text{CDCl}_3$ ):** 8.80 (2 x s, 1H), 8.02 (2 x s, 1H), 7.72 (2 x d, 1H,  $J = 8.2$  Hz), 7.31-7.23 (m, 7H), 7.19-7.17 (m, 2H), 7.11-

7.03 (m, 4H), 6.89-6.86 (m, 1H), 6.11 (2 x d, 1H,  $J = 21.3$  Hz), 5.79 (2 x d, 1H,  $J = 3.4$  Hz), 4.96-4.60 (m, 4H), 4.70-4.60 (m, 3H), 4.553 (2 x dd, 1H,  $J = 8.1, 2.0$  Hz), 24-4.10 (m, 4H), 3.86-3.45 (m, 3H), 1.91-1.72 (m, 6H), 1.67-1.57 (m, 2H).  **$^{13}\text{C}$  NMR (125 MHz,  $\text{CDCl}_3$ ):** 163.0, 158.6 (2 x s), 150.8, 144.5, 140.3 (2 x s), 135.2-135.0 (m), 132.9 (2 x s), 130.3 (2 x s), 128.8-128.6 (m), 128.1 (m), 123.0, 120.4 (m), 116.6 (2 x s), 116.0 (2 x d,  $J = 7.1$  Hz), 102.2, 91.0, 84.0 (2 x s), 79.4, 75.6, 70.7 (2 x s), 69.7 (2 x s), 69.1 (2 x s), 68.9 (2 x s), 63.4 (2 x s), 62.0 (2 x d,  $J = 155.4$  Hz), 32.8, 24.1.  **$^{31}\text{P}$  NMR (162 MHz,  $\text{CDCl}_3$ ):** 16.8. **ESI-HRMS:**  $m/z$  calculated for  $\text{C}_{39}\text{H}_{38}\text{N}_5\text{O}_{10}\text{PNa}$   $[\text{M} + \text{Na}]^+$ : 782.2567, found 782.2598.

***5'-O-[1-(Dibenzoxyphosphoryl-3-phenoxy-4-fluorophenylmethyl)-1,2,3-triazol-4-yl]methyluridine (12c)***

From **11c** (59.9 mg, 0.119 mmol): purified by column chromatography using a DCM/MeOH (9:1) eluent, to give a white solid (51.1 mg, 66%).  $R_f$  0.67 (Silica, DCM:MeOH, 9:1).  **$^1\text{H}$  NMR (400 MHz, MeOD):** 8.16 (s, 1H), 7.86 (2 x d, 1H,  $J = 8.2$  Hz), 7.34-7.10 (m, 19H), 6.90-6.88 (m, 2H), 6.54 (2 x d, 1H,  $J = 22.2$  Hz), 5.88 (d, 1H,  $J = 4.5$  Hz), 5.53 (2 x d, 1H,  $J = 8.3$  Hz), 5.03-4.94 (m, 4H), 4.68 (m, 2H), 4.12 (m, 3H), 3.79 (m, 2H).  **$^{13}\text{C}$  NMR (100 MHz, MeOD):** 164.6, 151.0, 149.0, 144.5, 140.8, 135.4, 129.6, 128.4, 127.8, 126.9, 124.3, 123.3, 121.9, 121.6 (d,  $J = 17.2$  Hz), 117.2, 101.4, 89.0, 83.4, 74.5, 70.2, 69.4-69.2 (m), 63.4, 60.6 (d,  $J = 155.1$  Hz).  **$^{31}\text{P}$  NMR (162 MHz, MeOD):** 16.3.  **$^{19}\text{F}$  NMR (376 MHz, MeOD):** -131.6 (2 x s). **ESI-HRMS:**  $m/z$  calculated for  $\text{C}_{55}\text{H}_{49}\text{FN}_5\text{O}_{14}\text{PNa}$   $[\text{M} + \text{Na}]^+$ : 808.2158, found 808.2160.

***5'-O-[1-(Dibenzoxyphosphoryl-4-fluorophenylmethyl)-1,2,3-triazol-4-yl]methyluridine (12d)***

From **11d** (109 mg, 0.265 mmol): purified by column chromatography with a 9:1 DCM/MeOH eluent to afford a white foam (106 mg, 57 %).  $R_f$  0.62 (DCM/MeOH, 9:1).  **$^1\text{H}$  NMR (400 MHz,  $\text{CDCl}_3$ ):** 9.52 (2 x s, 1H), 8.01 (2 x s, 1H), 7.74 (m, 1H,  $J = 8.1$  Hz), 7.50-7.46 (m, 2H), 7.30-7.24 (m, 6H), 7.17-7.15 (m, 2H), 7.11-7.08 (m, 2H), 7.01 (2 x t, 2H,  $J = 8.6$  Hz), 6.15 (2 x d, 1H,  $J = 22.2$  Hz), 5.82 (2 x d, 1H,  $J = 3.0$  Hz), 5.59 (2 x d, 1H,  $J = 8.4$  Hz), 4.96-4.80 (m, 4H), 4.59-4.67 (m, 3H), 4.22-4.16 (m, 3H), 3.86-3.49 (m, 3H).  **$^{13}\text{C}$  NMR (100 MHz,  $\text{CDCl}_3$ ):** 163.5 (2 x s), 163.4 (2 x d,  $J = 274.4$  Hz), 151.0, 144.7 (2 x s), 140.5 (2 x s), 134.9-135.1 (m), 130.8 (m), 128.8, 128.68, 128.65, 128.15, 128.12, 128.09, 122.9 (2 x s), 116.3 (2 x d,  $J = 21.3$  Hz), 103.0 (2 x s), 102.3 (2 x s), 90.7 (2 x s), 83.8, 75.4 (2 x s), 70.5 (2 x s), 69.8 (2 x s), 69.3 (2 x s), 69.1 (2 x s), 64.4, 61.2 (d,  $J = 155.8$  Hz).  **$^{31}\text{P}$  NMR (162 MHz,  $\text{CDCl}_3$ ):** 16.5.  **$^{19}\text{F}$  NMR (376 MHz,  $\text{CDCl}_3$ ):** -111.0 (2 x m). **ESI-HRMS:**  $m/z$  calculated for  $\text{C}_{39}\text{H}_{38}\text{N}_5\text{O}_{10}\text{PNa}$   $[\text{M} + \text{Na}]^+$ : 716.1898, found 716.1899.

***5'-O-[1-(Dibenzoxyphosphoryl-3-trifluoromethylphenylmethyl)-1,2,3-triazol-4-yl]methyluridine (12e)***

From **11e** (159 mg, 0.344 mmol): purified by column chromatography with a 9:1 DCM/MeOH eluent to afford a white foam (156 mg, 60 %).  $R_f$  0.56 (DCM/MeOH, 9:1).  **$^1\text{H}$  NMR (400 MHz, MeOD):** 8.85-8.34 (2 x s, 1H), 8.31-8.11 (2 x s, 1H), 7.71 (2 x d, 1H,  $J = 8.2$  Hz), 7.41-7.34 (m, 7H), 7.25-7.21

(m, 2H), 7.18-7.10 (m, 4H), 6.93-6.90 (m, 1H), 6.18-6.12 (2 x d, 1H,  $J = 22.0$  Hz), 5.80 (2 x d, 1H,  $J = 2.3$  Hz), 5.71-5.66 (m, 1H), 5.13-4.79 (m, 4H), 4.68-4.59 (m, 2H), 4.49 (bs, 1H), 4.18-4.14 (m, 3H), 3.86-3.50 (m, 3H).  **$^{13}\text{C}$  NMR (100 MHz, MeOD):** 162.6 (2 x s), 150.0, 144.7 (2 x s), 140.6 (2 x s), 135.0, 134.8 (2 x s), 134.7 (2 x s), 132.7 (2 x s), 131.9 (m), 129.8 (2 x s), 128.9-128.2 (m), 126.3 (m), 125.6 (m), 123.5 (q,  $J = 272.7$  Hz), 123.0 (2 x s), 103.2 (2 x s), 90.2 (2 x s), 83.6 (2 x s), 75.3 (2 x s), 70.9 (2 x s), 69.7 (m), 69.5 (m), 68.9 (2 x s), 65.0 (2 x s), 61.6 (d,  $J = 155.3$  Hz).  **$^{31}\text{P}$  NMR (162 MHz, MeOD):** 15.6.  **$^{19}\text{F}$  NMR (376 MHz, MeOD):** -62.7 (2 x s). **ESI-HRMS:**  $m/z$  calculated for  $\text{C}_{34}\text{H}_{33}\text{F}_3\text{N}_5\text{O}_9\text{PNa}$   $[\text{M} + \text{Na}]^+$ : 765.2158, found 765.2182.

**5'-O-[1-(Dibenzoxyphosphoryl-3-(1,1,2,2-tetrafluoroethoxy)phenylmethyl)-1,2,3-triazol-4-yl]methyluridine (12f)**

From **11f** (18.5 mg, 0.0363 mmol): purified by column chromatography with a 9:1 DCM/MeOH eluent to afford a white foam (12.1 mg, 52 %).  $R_f$  0.61 (Silica, DCM:MeOH, 9:1).  **$^1\text{H}$  NMR (500 MHz, MeOD):** 8.21 (s, 1H), 7.86 (2 x d, 1H,  $J = 8.2$  Hz), 7.50-7.43 (m, 3H), 7.32-7.29 (m, 7H), 7.21-7.19 (m, 4H), 6.54 (2 x d, 1H,  $J = 22.4$  Hz), 6.32 (tt, 1H,  $J = 52.5, 3.0$  Hz), 5.88 (d, 1H,  $J = 4.5$  Hz), 5.55 (2 x d, 1H,  $J = 8.0$  Hz), 5.07-4.94 (m, 4H), 4.68 (m, 2H), 4.12 (m, 3H), 3.79 (m, 2H).  **$^{13}\text{C}$  NMR (125 MHz, MeOD):** 164.6, 151.0, 149.0, 144.6, 140.9, 135.3, 134.4, 130.2, 128.6-127.8 (m), 128.4, 128.3, 128.1, 128.0, 127.9, 127.8, 127.5, 127.4 (2 x s), 126.9, 124.4, 122.3, 121.9, 121.6 (d,  $J = 17.2$  Hz), 116.6 (t,  $J = 271.0$  Hz), 108.0 (t,  $J = 250.6$  Hz), 101.5, 89.1, 83.4, 74.5, 70.2, 69.5-69.2 (m), 65.5, 63.5, 60.6 (d,  $J = 155.1$  Hz).  **$^{31}\text{P}$  NMR (162 MHz, MeOD):** 16.1.  **$^{19}\text{F}$  NMR (376 MHz, MeOD):** -89.8, -139.2. **ESI-HRMS:**  $m/z$  calculated for  $\text{C}_{35}\text{H}_{33}\text{F}_4\text{N}_5\text{O}_{10}\text{P}$   $[\text{M} - \text{H}]^-$ : 790.1901, found 790.1902.

**5'-O-[1-(Dibenzoxyphosphorylbenzothiophen-3-ylmethyl)-1,2,3-triazol-4-yl]methyluridine (12g)**

From **11g** (105 mg, 0.234 mmol): purified by column chromatography with a 9:1 DCM/MeOH eluent to afford a white foam (97.7 mg, 57 %).  $R_f$  0.65 (DCM/MeOH, 9:1).  **$^1\text{H}$  NMR (500 MHz,  $\text{CDCl}_3$ ):** 8.95 (2 x s, 1H), 8.22 (2 x s, 1H), 7.88-7.80 (m, 2H), 7.67-7.64 (m, 2H), 7.38-7.35 (m, 2H), 7.32-7.29 (m, 3H), 7.08-7.07 (m, 2H), 7.24-7.17 (m, 5H), 6.59 (2 x d, 1H,  $J = 20.9$  Hz), 5.80 (2 x d, 1H,  $J = 3.1$  Hz), 5.62 (2 x d, 1H,  $J = 8.1$  Hz), 5.01-4.75 (m, 4H), 4.63-4.53 (m, 2H), 4.20-4.13 (m, 4H), 3.82-3.56 (m, 3H).  **$^{13}\text{C}$  NMR (125 MHz,  $\text{CDCl}_3$ ):** 163.0, 150.9 (2 x s), 144.8 (2 x s), 140.3 (2 x s), 139.8 (2 x s), 137.2 (d,  $J = 10.7$  Hz), 135.03, 134.99, 134.8 (2 x d,  $J = 5.1$  Hz), 129.0-128.6 (m), 128.14, 128.08 (2 x s), 125.5 (2 x s), 125.3 (2 x s), 125.0 (2 x s), 123.0 (2 x s), 122.8 (2 x s), 121.2, 102.2 (2 x s), 90.9 (2 x s), 83.9, 75.5 (2 x s), 70.6 (2 x s), 69.8-69.7 (m), 69.4-69.3 (m), 69.0 (2 x s), 64.5 (2 x s), 54.9 (d,  $J = 159.1$  Hz).  **$^{31}\text{P}$  NMR (162 MHz,  $\text{CDCl}_3$ ):** 16.6 (2 x s). **ESI-HRMS:**  $m/z$  calculated for  $\text{C}_{35}\text{H}_{34}\text{N}_5\text{O}_9\text{PSNa}$   $[\text{M} + \text{Na}]^+$ : 754.1717, found 754.1713.

## CMP-Glo based Sialyltransferase Inhibition Assay

Recombinant human ST3Gal I and ST6Gal I were obtained from R&D Systems, CMP-Neu5Ac (purified prior to use by size exclusion chromatography), Gal- $\beta$ 1,3-GalNAc and LacNAc were from Carbosynth. Assays were performed in a sodium cacodylate buffer (5.0 mM sodium cacodylate, 15.0  $\mu$ M NaCl, 0.05 % Triton X-100). Assays were performed in a solid white 96-well plate, in a 25  $\mu$ L volume for one hour, incubated at room temperature. CMP detection reagent was prepared as per Promega's guidelines, and 25  $\mu$ L was added, with luminescence measured after a further hour of incubation. In each assay a CMP standard curve was established in duplicate, with concentrations ranging from 0-100 $\mu$ M.

### Enzyme activity curve

To determine the amount of enzyme to use in each assay, an assay was performed using amounts of enzyme ranging from 0-500 ng/well. The amount of enzyme was added in 15  $\mu$ L of assay buffer, to which was added 10  $\mu$ L of a mixture containing 25  $\mu$ M CMP-Neu5Ac and 2.5 mM acceptor (Gal- $\beta$ 1,3-GalNAc and LacNAc for ST3Gal I and ST6Gal I respectively). The resultant sigmoidal activity curve of luminescence vs quantity of enzyme showed a linear region of response, which gave a guideline as to the amount of enzyme that should be used for subsequent reactions.

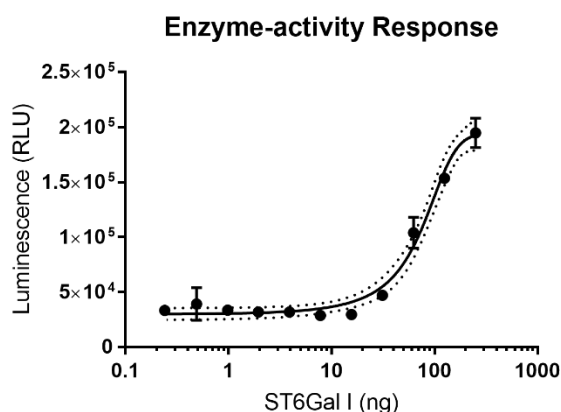

| Interpolation                           | Luminescence (RLU)       |
|-----------------------------------------|--------------------------|
|                                         | Y                        |
| Sigmoidal, 4PL, X is log(concentration) |                          |
| Best-fit values                         |                          |
| Top                                     | 193637                   |
| Bottom                                  | 3751                     |
| LogIC50                                 | 68.26                    |
| HillSlope                               | 0.01169                  |
| IC50                                    | 1.824e+068               |
| Span                                    | 189886                   |
| 95% CI (asymptotic)                     |                          |
| Top                                     | 178245 to 209028         |
| Bottom                                  | -30104 to 37606          |
| LogIC50                                 | 50.31 to 86.21           |
| HillSlope                               | 0.006578 to 0.01679      |
| IC50                                    | 2.038e+050 to 1.632e+086 |
| Span                                    | 147449 to 232323         |
| Goodness of Fit                         |                          |
| Degrees of Freedom                      | 20                       |
| R square                                | 0.9756                   |
| Adjusted R square                       | 0.972                    |
| Absolute Sum of Squares                 | 1724622611               |

**Figure S1.** Enzyme-activity curve for ST6Gal I in the CMP-Glo™ assay. The assay gave a  $R^2 = 0.9756$  for the sigmoidal response curve.

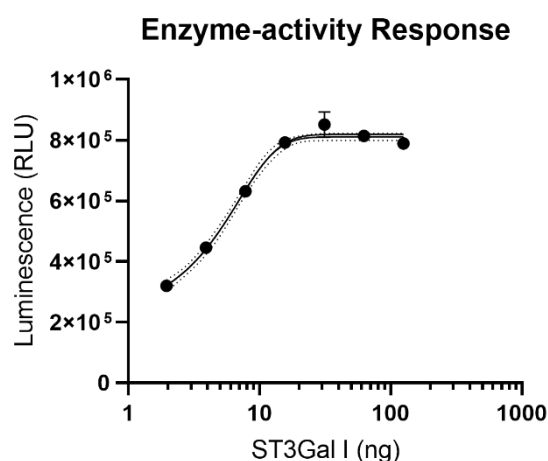

| Interpolation                           | A                  |
|-----------------------------------------|--------------------|
| Table of results                        | Luminescence (RLU) |
| Sigmoidal, 4PL, X is log(concentration) |                    |
| Best-fit values                         |                    |
| Top                                     | 810208             |
| Bottom                                  | -84327             |
| LogIC50                                 | 2.630              |
| HillSlope                               | 0.1191             |
| IC50                                    | 426.1              |
| Span                                    | 894534             |
| 95% CI (asymptotic)                     |                    |
| Top                                     | 798418 to 821997   |
| Bottom                                  | -553712 to 385059  |
| LogIC50                                 | -1.206 to 6.465    |
| HillSlope                               | 0.08058 to 0.1576  |
| IC50                                    | 0.06229 to 2914808 |
| Span                                    | 421453 to 1367616  |
| Goodness of Fit                         |                    |
| Degrees of Freedom                      | 16                 |
| R squared                               | 0.9942             |
| Adjusted R squared                      | 0.9931             |
| Sum of Squares                          | 4195321444         |

**Figure S2.** Enzyme-activity curve for ST3Gal I in the CMP-Glo™ assay. The assay gave a  $R^2 = 0.9942$  for the sigmoidal response curve.

### Determination of CMP-Neu5Ac $K_m$ against hST6Gal I

CMP-Neu5Ac was diluted to 1250, 625, 312.5, 156.3, 78.1, 39.1, 19.5, 9.8, 4.9, 2.4, 1.2, and 0  $\mu\text{M}$ , while the enzyme was diluted to 60 ng/5  $\mu\text{L}$ . In duplicate on a solid white 96-well plate, 10  $\mu\text{L}$  of donor, 10  $\mu\text{L}$  of 2.5 mM acceptor, and 5  $\mu\text{L}$  of enzyme were added. The assay was then performed as per the general procedure detailed above. The  $K_m$  was calculated using non-linear regression analysis with GraphPad Prism 7.

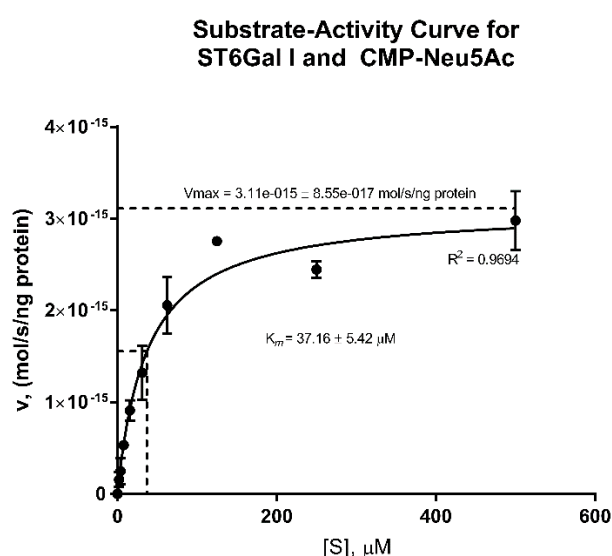

| Nonlin fit |                             | v, (mol/s/ng protein)    |
|------------|-----------------------------|--------------------------|
|            |                             | Y                        |
| 1          | Michaelis-Menten            |                          |
| 2          | Best-fit values             |                          |
| 3          | Vmax                        | 3.11e-015                |
| 4          | Km                          | 37.16                    |
| 5          | Std. Error                  |                          |
| 6          | Vmax                        | 8.547e-017               |
| 7          | Km                          | 5.422                    |
| 8          | 95% CI (profile likelihood) |                          |
| 9          | Vmax                        | 2.847e-015 to 3.396e-015 |
| 10         | Km                          | 27.44 to 50.23           |
| 11         | Goodness of Fit             |                          |
| 12         | Degrees of Freedom          | 17                       |
| 13         | R square                    | 0.9694                   |
| 14         | Absolute Sum of Squares     | 6.589e-031               |
| 15         | Sy.x                        | 1.969e-016               |
| 16         | Constraints                 |                          |
| 17         | Km                          | Km > 0                   |
| 18         |                             |                          |

**Figure S3.** Non-linear regression analysis in Michaelis-Menten equation of CMP-Neu5Ac with recombinant hST6Gal I. This is the same data as from our previous work.<sup>2</sup>

### Single point inhibition at 100 and 10 $\mu\text{M}$

Enzyme was diluted to 20 ng/5  $\mu\text{L}$  and 60 ng/5  $\mu\text{L}$  for ST3Gal I and ST6Gal I respectively. To a solid white 96 well plate, 10  $\mu\text{L}$  of a mixture of 2.5 mM acceptor and 250  $\mu\text{M}$  donor in assay buffer, 10  $\mu\text{L}$

of a 250 or 25  $\mu\text{M}$  solution of inhibitor in assay buffer (for inhibition at 100 or 10  $\mu\text{M}$  respectively), and 5  $\mu\text{L}$  of enzyme solution were added to each well in duplicate. A positive control with no inhibitor was also prepared, as well as a negative control where no enzyme was present. The assay was then performed as per the general procedure detailed above. Percentage inhibition was calculated relative to the positive control, with the negative control used as a blank.

### Determination of inhibitor $K_i$ against hST6Gal I

CMP-Neu5Ac was diluted to 2500, 625, 156.3, 39.1, and 9.8, while the enzyme was diluted to 60 ng/5  $\mu\text{L}$ . Inhibitors were diluted to three concentrations, usually between 0.5-62.5  $\mu\text{M}$ . To a solid white 96 well plate, 5  $\mu\text{L}$  of CMP-Neu5Ac solution, 5  $\mu\text{L}$  of 5 mM acceptor in assay buffer, 10  $\mu\text{L}$  of inhibitor solution, and 5  $\mu\text{L}$  of enzyme solution were added to each well in duplicate. The assay was then performed as per the general procedure detailed above. The  $K_i$ 's were calculated using non-linear regression analysis with GraphPad Prism 8.

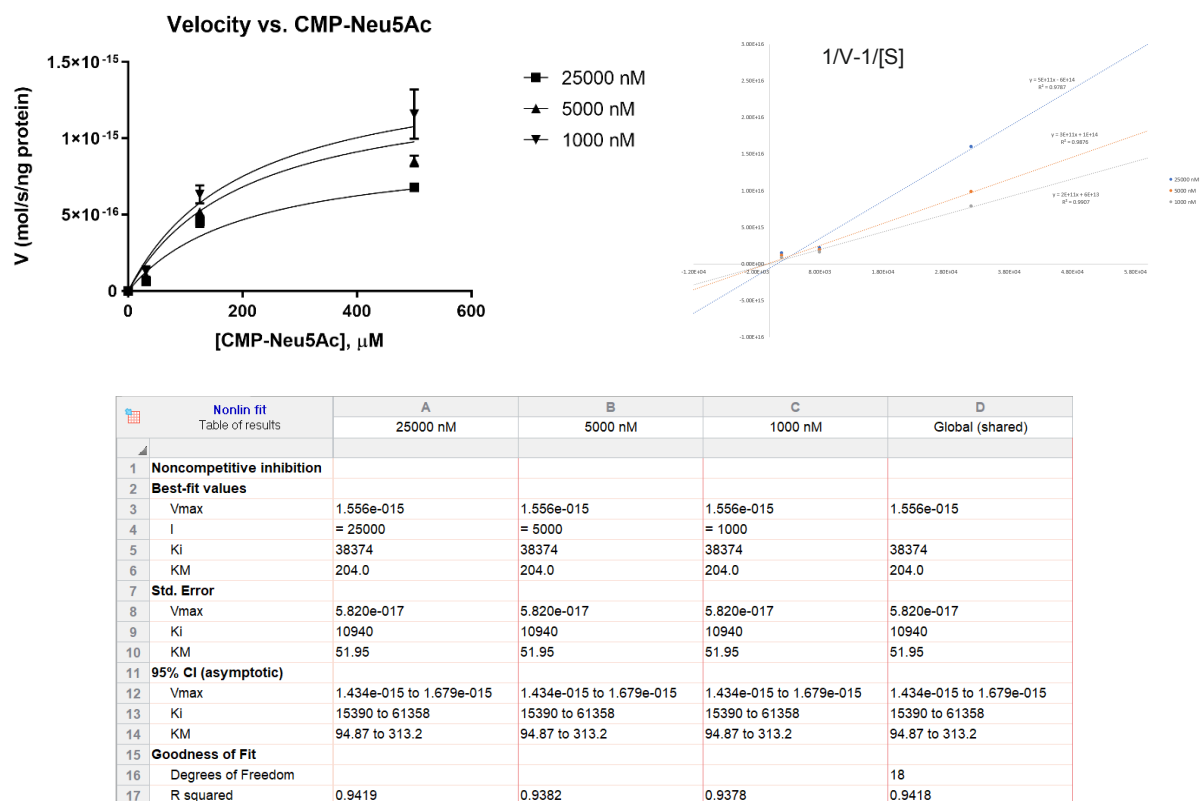

**Figure S4.** Non-linear regression analysis in of velocity vs [CMP-NeuAc] with recombinant hST6Gal I at three **13a-s** concentrations.

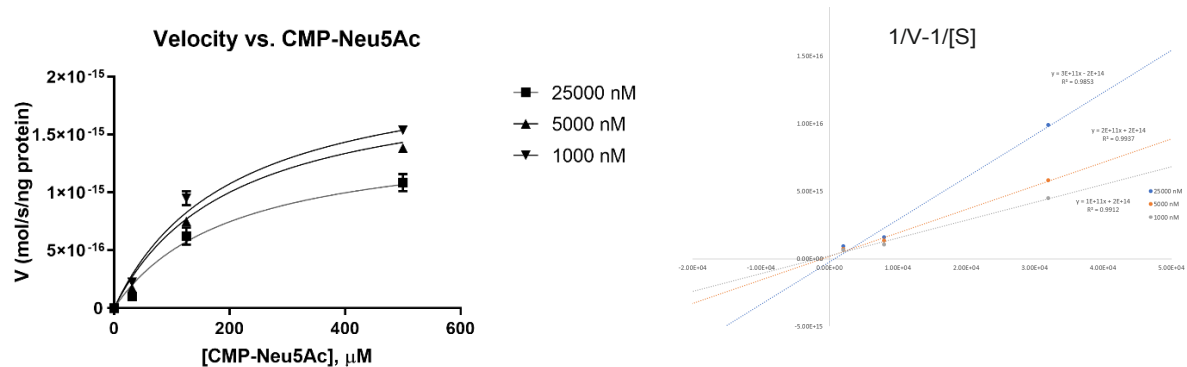

| Nonlin fit<br>Table of results |                           | A<br>25000 nM            | B<br>5000 nM             | C<br>1000 nM             | D<br>Global (shared)     |
|--------------------------------|---------------------------|--------------------------|--------------------------|--------------------------|--------------------------|
| 1                              | Noncompetitive inhibition |                          |                          |                          |                          |
| 2                              | Best-fit values           |                          |                          |                          |                          |
| 3                              | Vmax                      | 2.200e-015               | 2.200e-015               | 2.200e-015               | 2.200e-015               |
| 4                              | I                         | = 25000                  | = 5000                   | = 1000                   |                          |
| 5                              | KI                        | 53686                    | 53686                    | 53686                    | 53686                    |
| 6                              | KM                        | 201.9                    | 201.9                    | 201.9                    | 201.9                    |
| 7                              | Std. Error                |                          |                          |                          |                          |
| 8                              | Vmax                      | 4.707e-017               | 4.707e-017               | 4.707e-017               | 4.707e-017               |
| 9                              | KI                        | 10220                    | 10220                    | 10220                    | 10220                    |
| 10                             | KM                        | 29.35                    | 29.35                    | 29.35                    | 29.35                    |
| 11                             | 95% CI (asymptotic)       |                          |                          |                          |                          |
| 12                             | Vmax                      | 2.101e-015 to 2.299e-015 | 2.101e-015 to 2.299e-015 | 2.101e-015 to 2.299e-015 | 2.101e-015 to 2.299e-015 |
| 13                             | KI                        | 32214 to 75159           | 32214 to 75159           | 32214 to 75159           | 32214 to 75159           |
| 14                             | KM                        | 140.3 to 263.6           | 140.3 to 263.6           | 140.3 to 263.6           | 140.3 to 263.6           |
| 15                             | Goodness of Fit           |                          |                          |                          |                          |
| 16                             | Degrees of Freedom        |                          |                          |                          | 18                       |
| 17                             | R squared                 | 0.9635                   | 0.9868                   | 0.9805                   | 0.9797                   |

**Figure S5.** Non-linear regression analysis of velocity vs [CMP-NeuAc] with recombinant hST6Gal I at three **13a-I** concentrations.

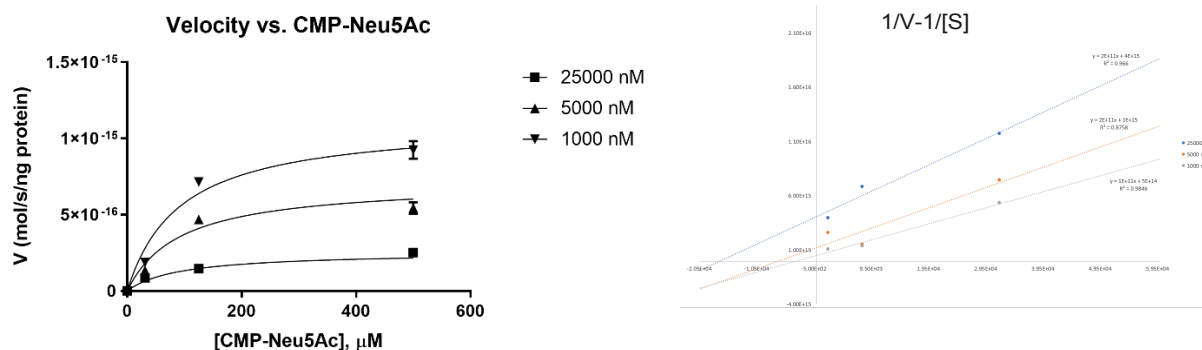

| Nonlin fit<br>Table of results |                           | A<br>25000 nM            | B<br>5000 nM             | C<br>1000 nM             | D<br>Global (shared)     |
|--------------------------------|---------------------------|--------------------------|--------------------------|--------------------------|--------------------------|
| 1                              | Noncompetitive inhibition |                          |                          |                          |                          |
| 2                              | Best-fit values           |                          |                          |                          |                          |
| 3                              | Vmax                      | 1.291e-015               | 1.291e-015               | 1.291e-015               | 1.291e-015               |
| 4                              | I                         | = 25000                  | = 5000                   | = 1000                   |                          |
| 5                              | KI                        | 6163                     | 6163                     | 6163                     | 6163                     |
| 6                              | KM                        | 92.70                    | 92.70                    | 92.70                    | 92.70                    |
| 7                              | Std. Error                |                          |                          |                          |                          |
| 8                              | Vmax                      | 3.813e-017               | 3.813e-017               | 3.813e-017               | 3.813e-017               |
| 9                              | KI                        | 1044                     | 1044                     | 1044                     | 1044                     |
| 10                             | KM                        | 21.72                    | 21.72                    | 21.72                    | 21.72                    |
| 11                             | 95% CI (asymptotic)       |                          |                          |                          |                          |
| 12                             | Vmax                      | 1.211e-015 to 1.372e-015 | 1.211e-015 to 1.372e-015 | 1.211e-015 to 1.372e-015 | 1.211e-015 to 1.372e-015 |
| 13                             | KI                        | 3968 to 8357             | 3968 to 8357             | 3968 to 8357             | 3968 to 8357             |
| 14                             | KM                        | 47.06 to 138.3           | 47.06 to 138.3           | 47.06 to 138.3           | 47.06 to 138.3           |
| 15                             | Goodness of Fit           |                          |                          |                          |                          |
| 16                             | Degrees of Freedom        |                          |                          |                          | 18                       |
| 17                             | R squared                 | 0.9180                   | 0.9314                   | 0.9594                   | 0.9649                   |

**Figure S6.** Non-linear regression analysis of velocity vs [CMP-NeuAc] with recombinant hST6Gal I at three **13c-s** concentrations.

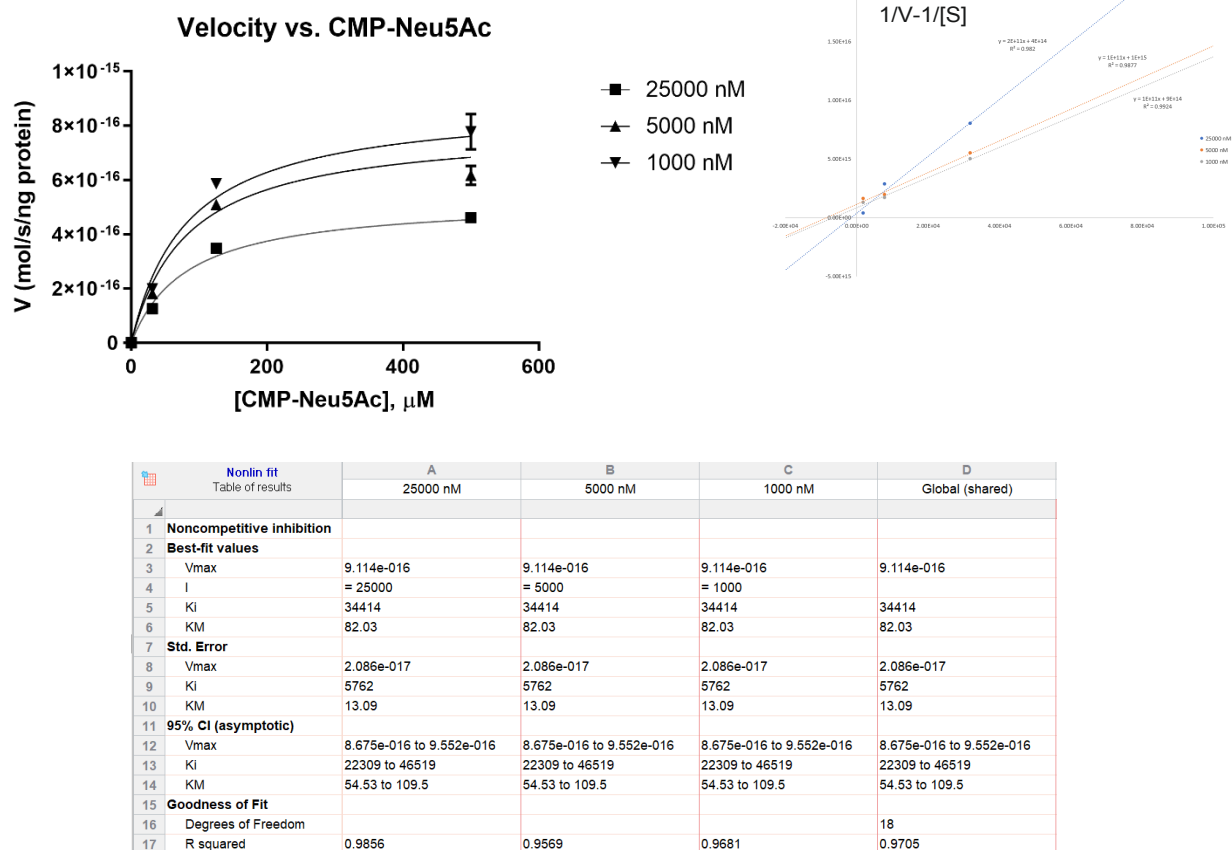

**Figure S7.** Non-linear regression analysis of velocity vs [CMP-NeuAc] with recombinant hST6Gal I at three **13c-I** concentrations.

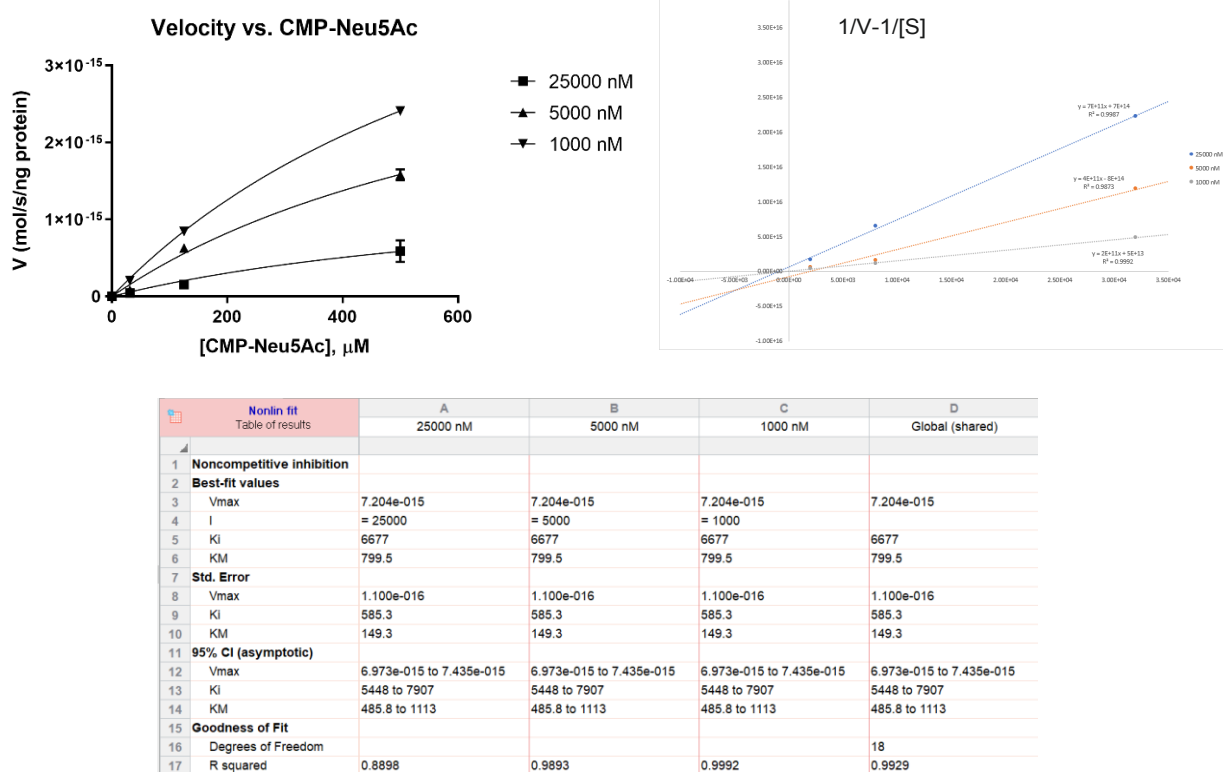

**Figure S8.** Non-linear regression analysis of velocity vs [CMP-NeuAc] with recombinant hST6Gal I at three **13f-s** concentrations.

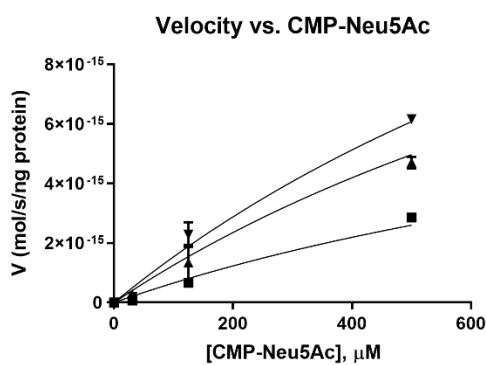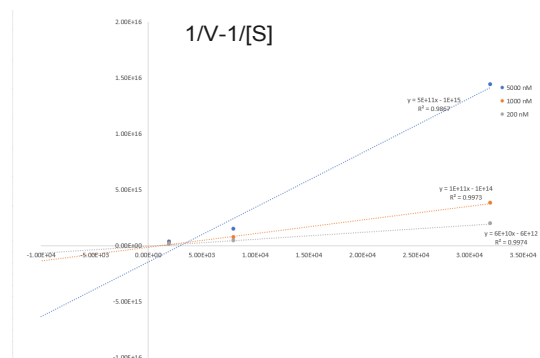

| Nonlin fit<br>Table of results |                           | A                        | B                        | C                        | D                        |
|--------------------------------|---------------------------|--------------------------|--------------------------|--------------------------|--------------------------|
|                                |                           | 5000 nM                  | 1000 nM                  | 200 nM                   | Global (shared)          |
| 1                              | Noncompetitive inhibition |                          |                          |                          |                          |
| 2                              | Best-fit values           |                          |                          |                          |                          |
| 3                              | Vmax                      | 2.487e-014               | 2.487e-014               | 2.487e-014               | 2.487e-014               |
| 4                              | I                         | = 5000                   | = 1000                   | = 200.0                  |                          |
| 5                              | Ki                        | 3385                     | 3385                     | 3385                     | 3385                     |
| 6                              | KM                        | 1432                     | 1432                     | 1432                     | 1432                     |
| 7                              | Std. Error                |                          |                          |                          |                          |
| 8                              | Vmax                      | 7.149e-016               | 7.149e-016               | 7.149e-016               | 7.149e-016               |
| 9                              | Ki                        | 604.7                    | 604.7                    | 604.7                    | 604.7                    |
| 10                             | KM                        | 769.4                    | 769.4                    | 769.4                    | 769.4                    |
| 11                             | 95% CI (asymptotic)       |                          |                          |                          |                          |
| 12                             | Vmax                      | 2.337e-014 to 2.637e-014 | 2.337e-014 to 2.637e-014 | 2.337e-014 to 2.637e-014 | 2.337e-014 to 2.637e-014 |
| 13                             | Ki                        | 2115 to 4655             | 2115 to 4655             | 2115 to 4655             | 2115 to 4655             |
| 14                             | KM                        | -184.2 to 3049           | -184.2 to 3049           | -184.2 to 3049           | -184.2 to 3049           |
| 15                             | Goodness of Fit           |                          |                          |                          |                          |
| 16                             | Degrees of Freedom        |                          |                          |                          | 18                       |
| 17                             | R squared                 | 0.9732                   | 0.9593                   | 0.9793                   | 0.9744                   |

**Figure S9.** Non-linear regression analysis of velocity vs [CMP-NeuAc] with recombinant hST6Gal I at three **13f-I** concentrations.

## References:

1. J. Sun, R. Liu, Q. Fu, J. Zang, Q. Tao, J. Wu and H. Zhu, *Helv. Chim. Acta*, 2014, **97**, 733-743.
2. A. P. Montgomery, C. Dobie, R. Szabo, L. Hallam, M. Ranson, H. Yu and D. Skropeta, *Bioorg. Med. Chem.*, 2020, **28**, 115561.

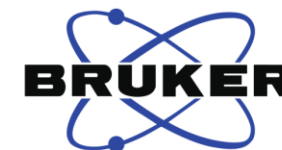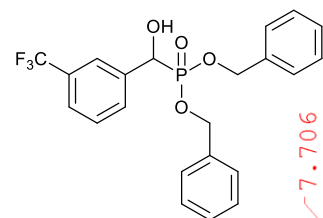

10e (<sup>1</sup>H NMR)

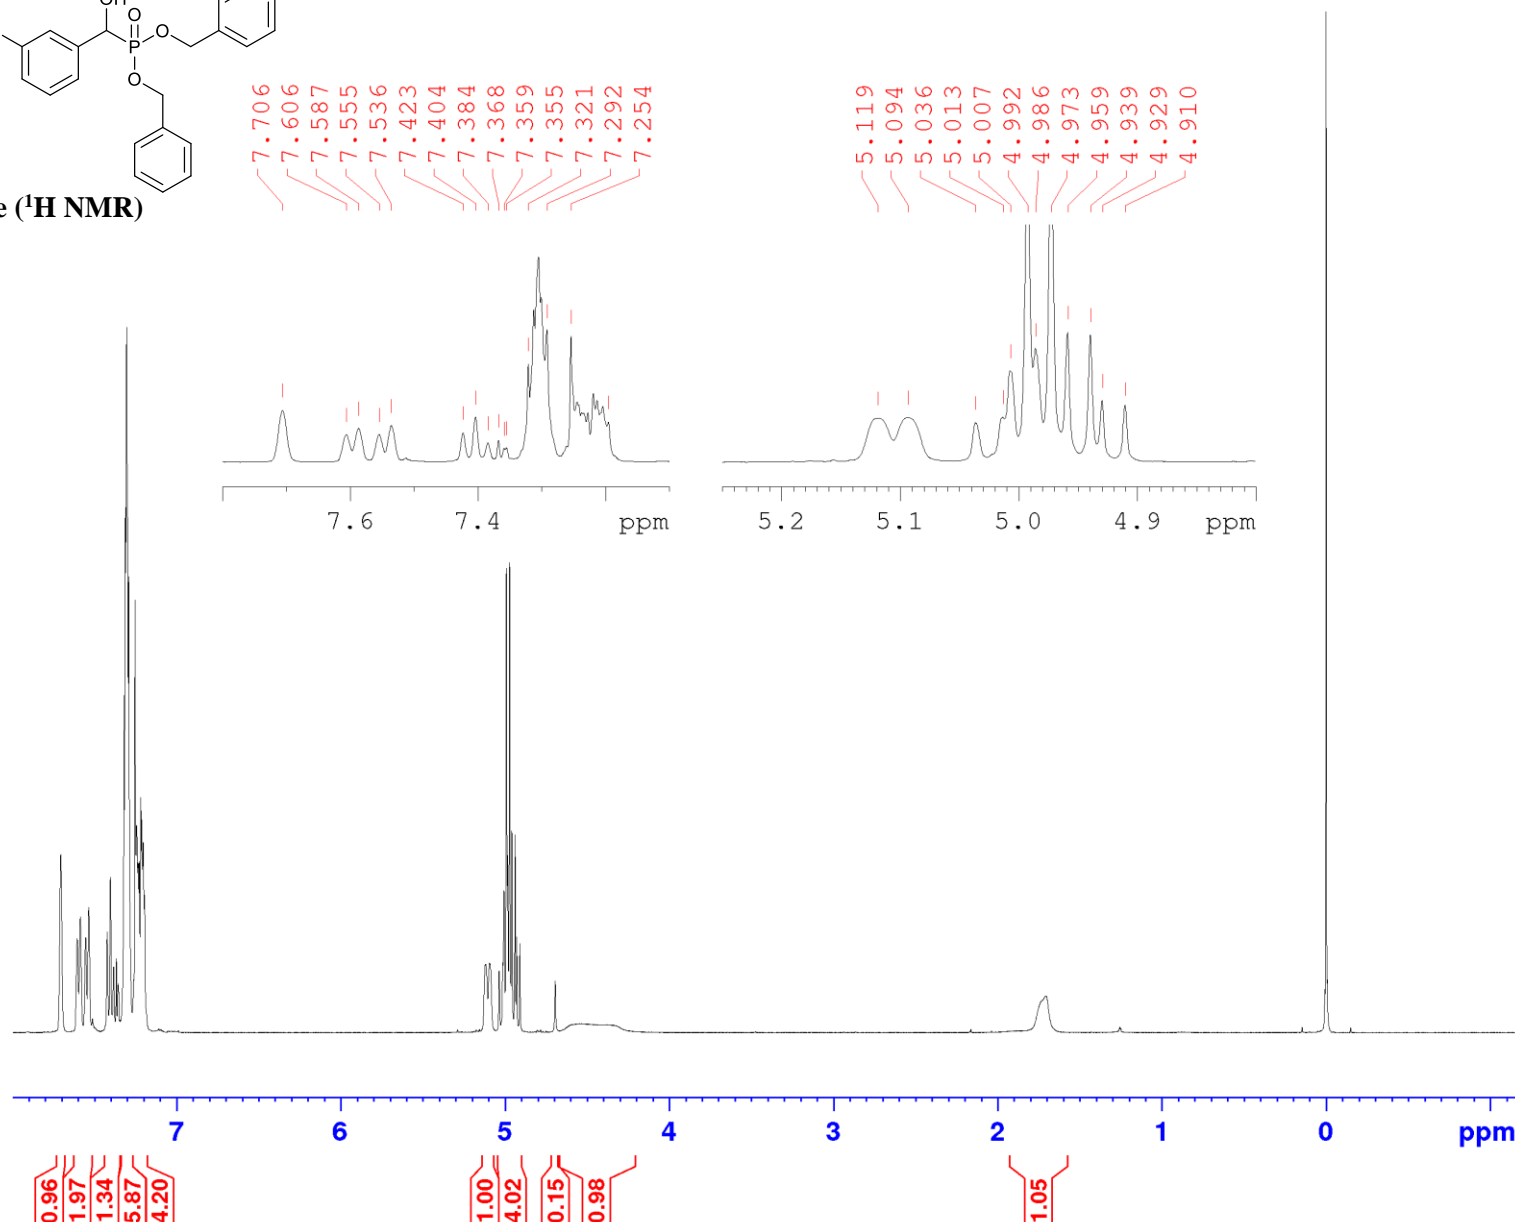

Current Data Parameters  
NAME CD36  
EXPNO 1  
PROCNO 1

F2 - Acquisition Parameters  
Date\_ 20171019  
Time 16.49 h  
INSTRUM spect  
PROBHD Z108618\_0921 (   
PULPROG zg30  
TD 65536  
SOLVENT CDCl3  
NS 16  
DS 2  
SWH 8012.820 Hz  
FIDRES 0.244532 Hz  
AQ 4.0894465 sec  
RG 144.7  
DW 62.400 usec  
DE 6.50 usec  
TE 298.6 K  
D1 1.00000000 sec  
TD0 1  
SFO1 400.1624710 MHz  
NUC1 1H  
P1 14.00 usec  
PLW1 11.52400017 W

F2 - Processing parameters  
SI 65536  
SF 400.1600119 MHz  
WDW EM  
SSB 0  
LB 0.30 Hz  
GB 0  
PC 1.00

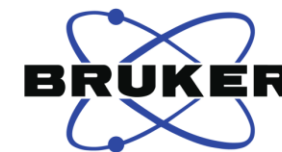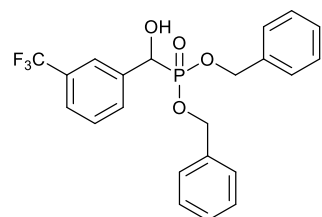

10e (<sup>13</sup>C NMR)

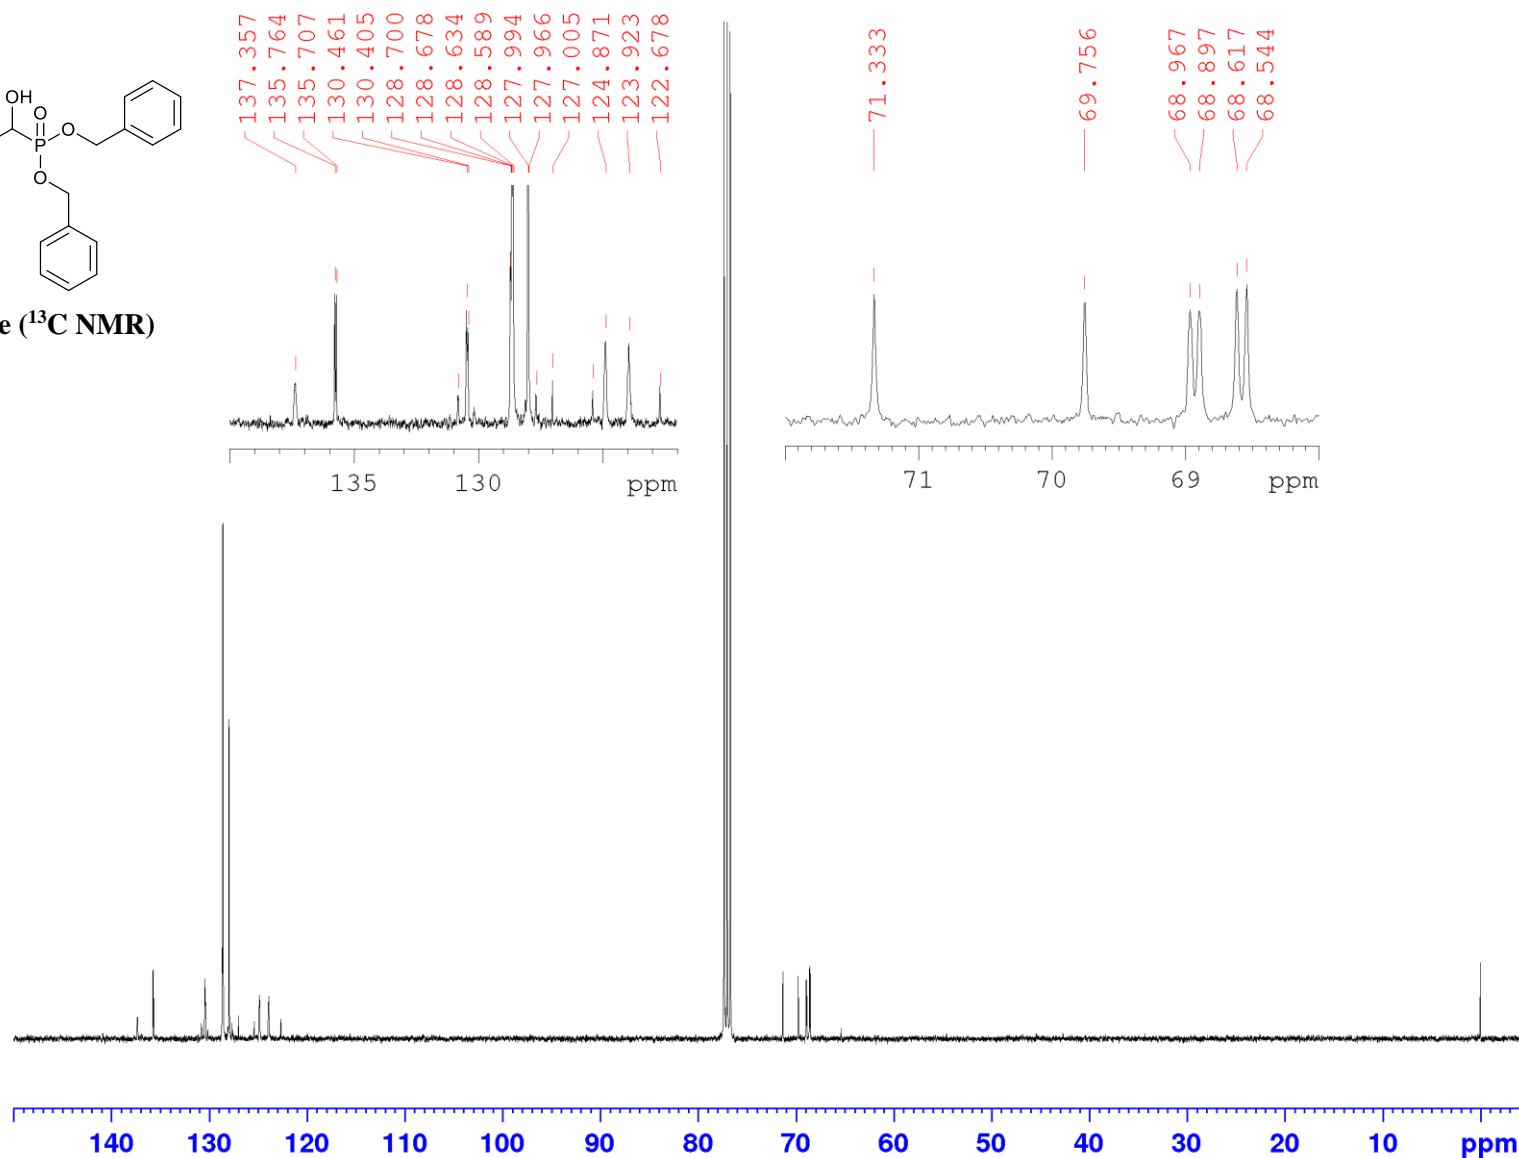

Current Data Parameters  
NAME CD36  
EXPNO 2  
PROCNO 1

F2 - Acquisition Parameters  
Date\_ 20171020  
Time 0.07 h  
INSTRUM spect  
PROBHD z108618\_0921 (   
PULPROG zgpg30  
TD 65536  
SOLVENT CDCl3  
NS 2048  
DS 4  
SWH 24038.461 Hz  
FIDRES 0.733596 Hz  
AQ 1.3631488 sec  
RG 196.38  
DW 20.800 usec  
DE 6.50 usec  
TE 298.1 K  
D1 2.00000000 sec  
D11 0.03000000 sec  
TD0 1  
SFO1 100.6303741 MHz  
NUC1 13C  
P1 10.00 usec  
PLW1 55.50099945 W  
SFO2 400.1616006 MHz  
NUC2 1H  
CPDPRG[2] waltz16  
PCPD2 90.00 usec  
PLW2 11.52400017 W  
PLW12 0.27886000 W  
PLW13 0.14026000 W

F2 - Processing parameters  
SI 32768  
SF 100.6203122 MHz  
WDW EM  
SSB 0  
LB 1.00 Hz  
GB 0  
PC 1.40

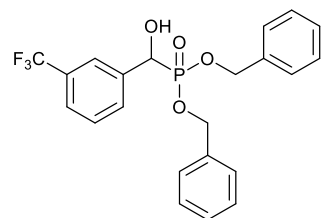

**10e ( $^{31}\text{P}$  NMR)**

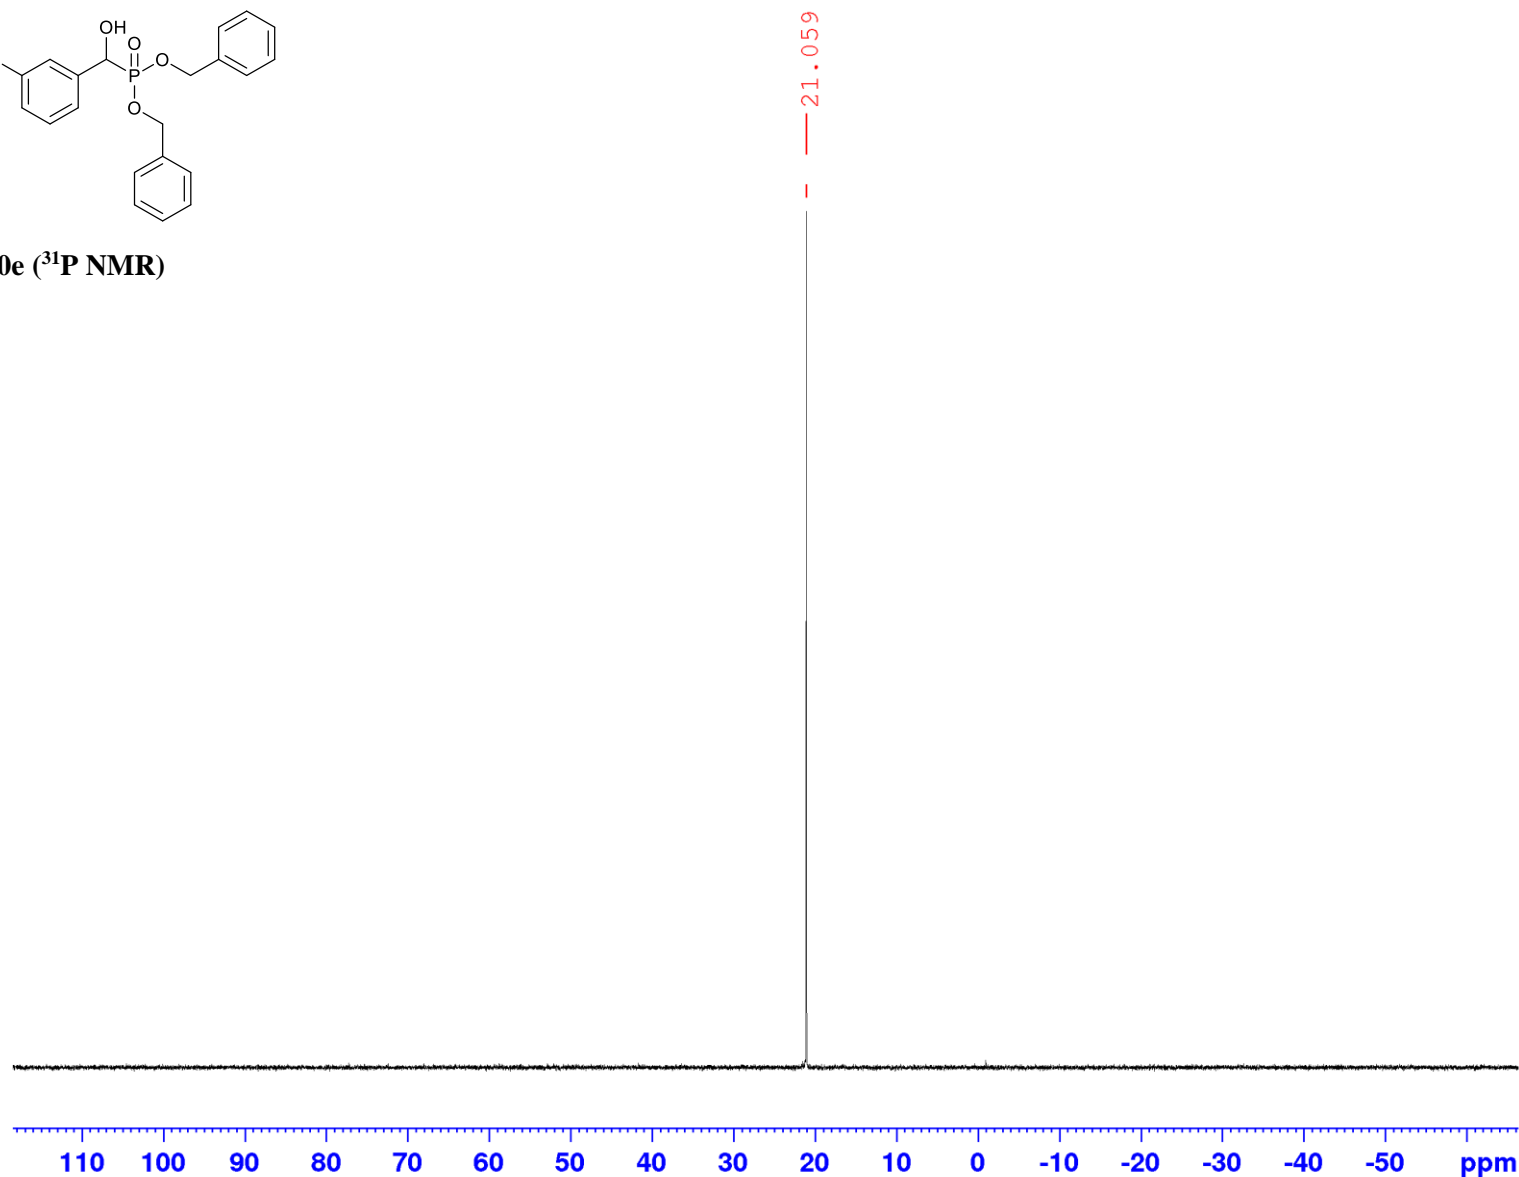

Current Data Parameters  
 NAME CD36  
 EXPNO 9  
 PROCNO 1

F2 - Acquisition Parameters  
 Date\_ 20171020  
 Time 1.25 h  
 INSTRUM spect  
 PROBHD Z108618\_0921 (  
 PULPROG zgpg30  
 TD 65536  
 SOLVENT CDCl3  
 NS 16  
 DS 4  
 SWH 64102.563 Hz  
 FIDRES 1.956255 Hz  
 AQ 0.5111808 sec  
 RG 196.38  
 DW 7.800 usec  
 DE 6.50 usec  
 TE 297.6 K  
 D1 2.00000000 sec  
 D11 0.03000000 sec  
 TD0 1  
 SFO1 161.9796378 MHz  
 NUC1  $^{31}\text{P}$   
 P1 15.00 usec  
 PLW1 11.77099991 W  
 SFO2 400.1616006 MHz  
 NUC2  $^1\text{H}$   
 CPDPRG[2] waltz16  
 PCPD2 90.00 usec  
 PLW2 11.52400017 W  
 PLW12 0.27886000 W  
 PLW13 0.14026000 W

F2 - Processing parameters  
 SI 32768  
 SF 161.9877372 MHz  
 WDW EM  
 SSB 0  
 LB 1.00 Hz  
 GB 0  
 PC 1.40

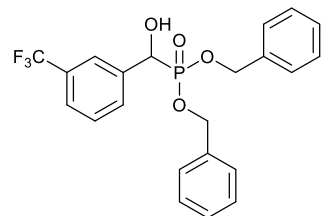

**10e (<sup>19</sup>F NMR)**

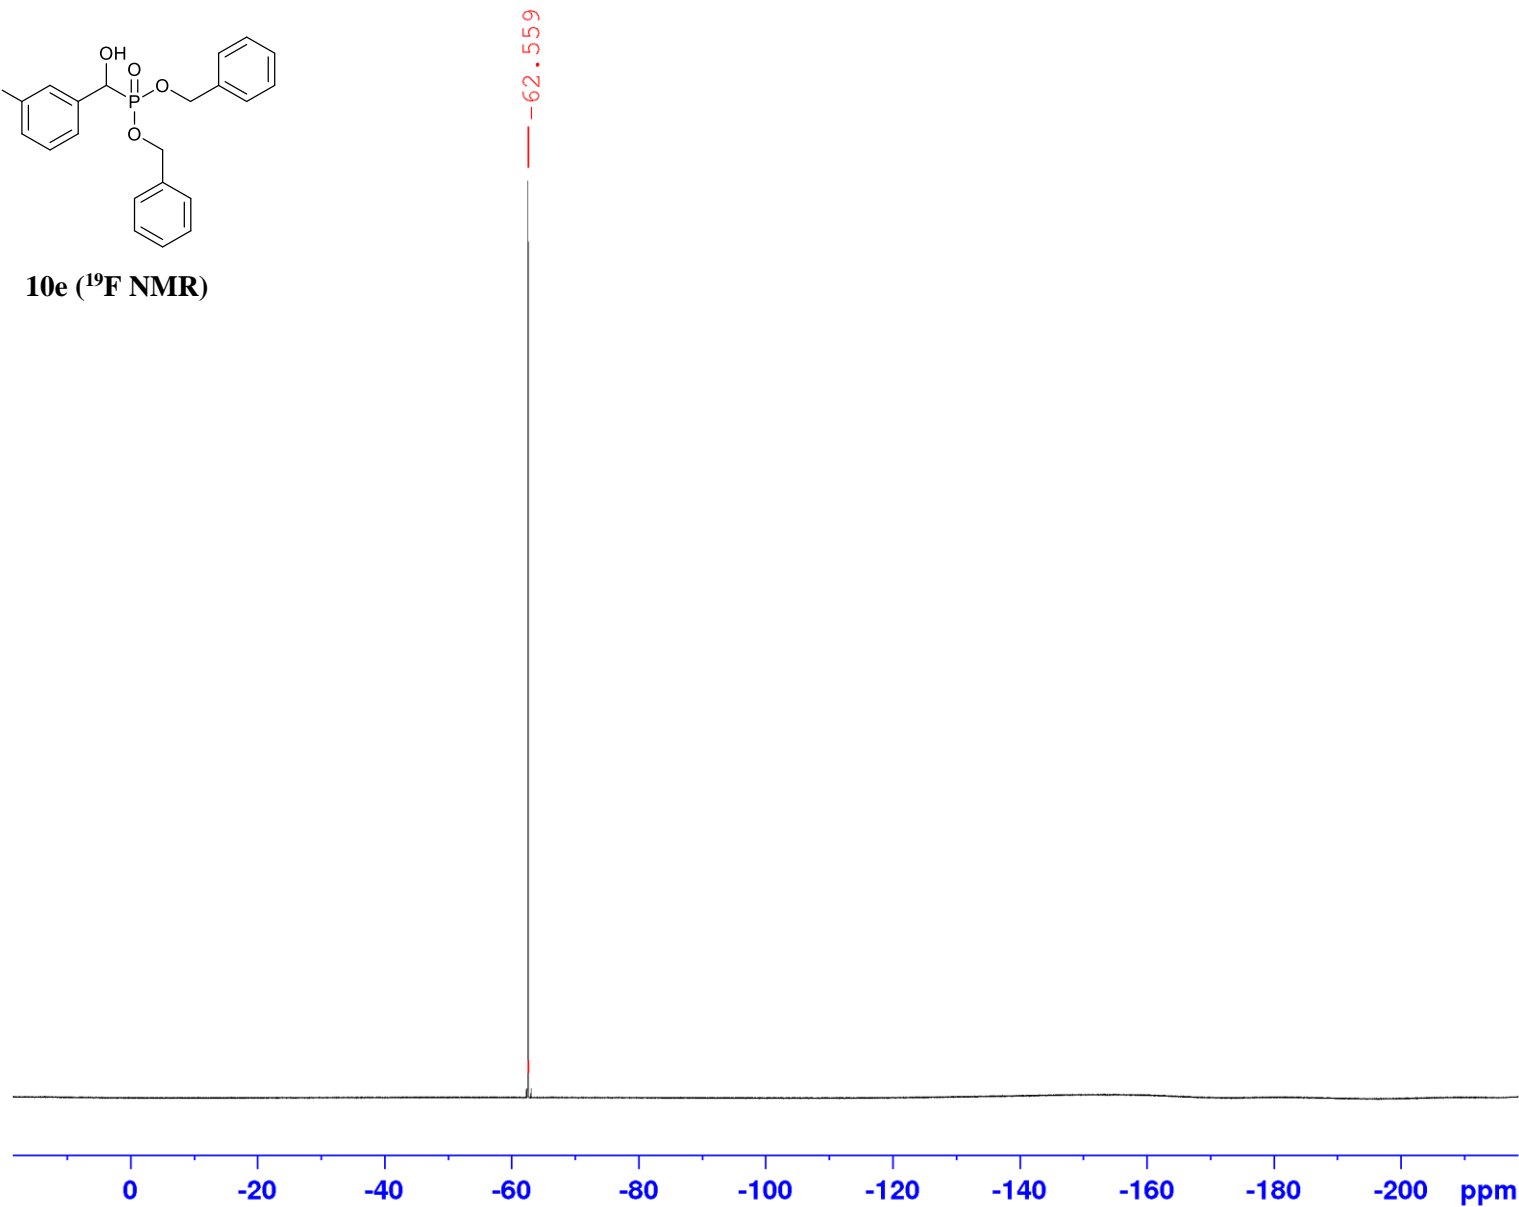

Current Data Parameters  
NAME CD36  
EXPNO 8  
PROCNO 1

F2 - Acquisition Parameters  
Date\_ 20171020  
Time 1.23 h  
INSTRUM spect  
PROBHD Z108618\_0921 (  
PULPROG zgfhigqn.2  
TD 131072  
SOLVENT CDCl3  
NS 16  
DS 4  
SWH 89285.711 Hz  
FIDRES 1.362392 Hz  
AQ 0.7340032 sec  
RG 196.38  
DW 5.600 usec  
DE 6.50 usec  
TE 297.5 K  
D1 1.00000000 sec  
D11 0.03000000 sec  
D12 0.00002000 sec  
TD0 1  
SFO1 376.4889418 MHz  
NUC1 19F  
P1 15.00 usec  
PLW1 17.75399971 W  
SFO2 400.1616006 MHz  
NUC2 1H  
CPDPRG[2] waltz16  
PCPD2 90.00 usec  
PLW2 11.52400017 W  
PLW12 0.27886000 W

F2 - Processing parameters  
SI 65536  
SF 376.5265944 MHz  
WDW EM  
SSB 0  
LB 0.30 Hz  
GB 0  
PC 1.00

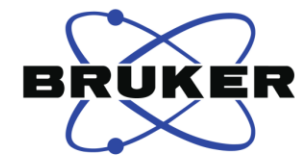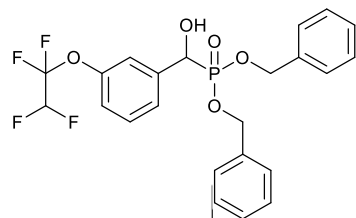

10f (<sup>1</sup>H NMR)

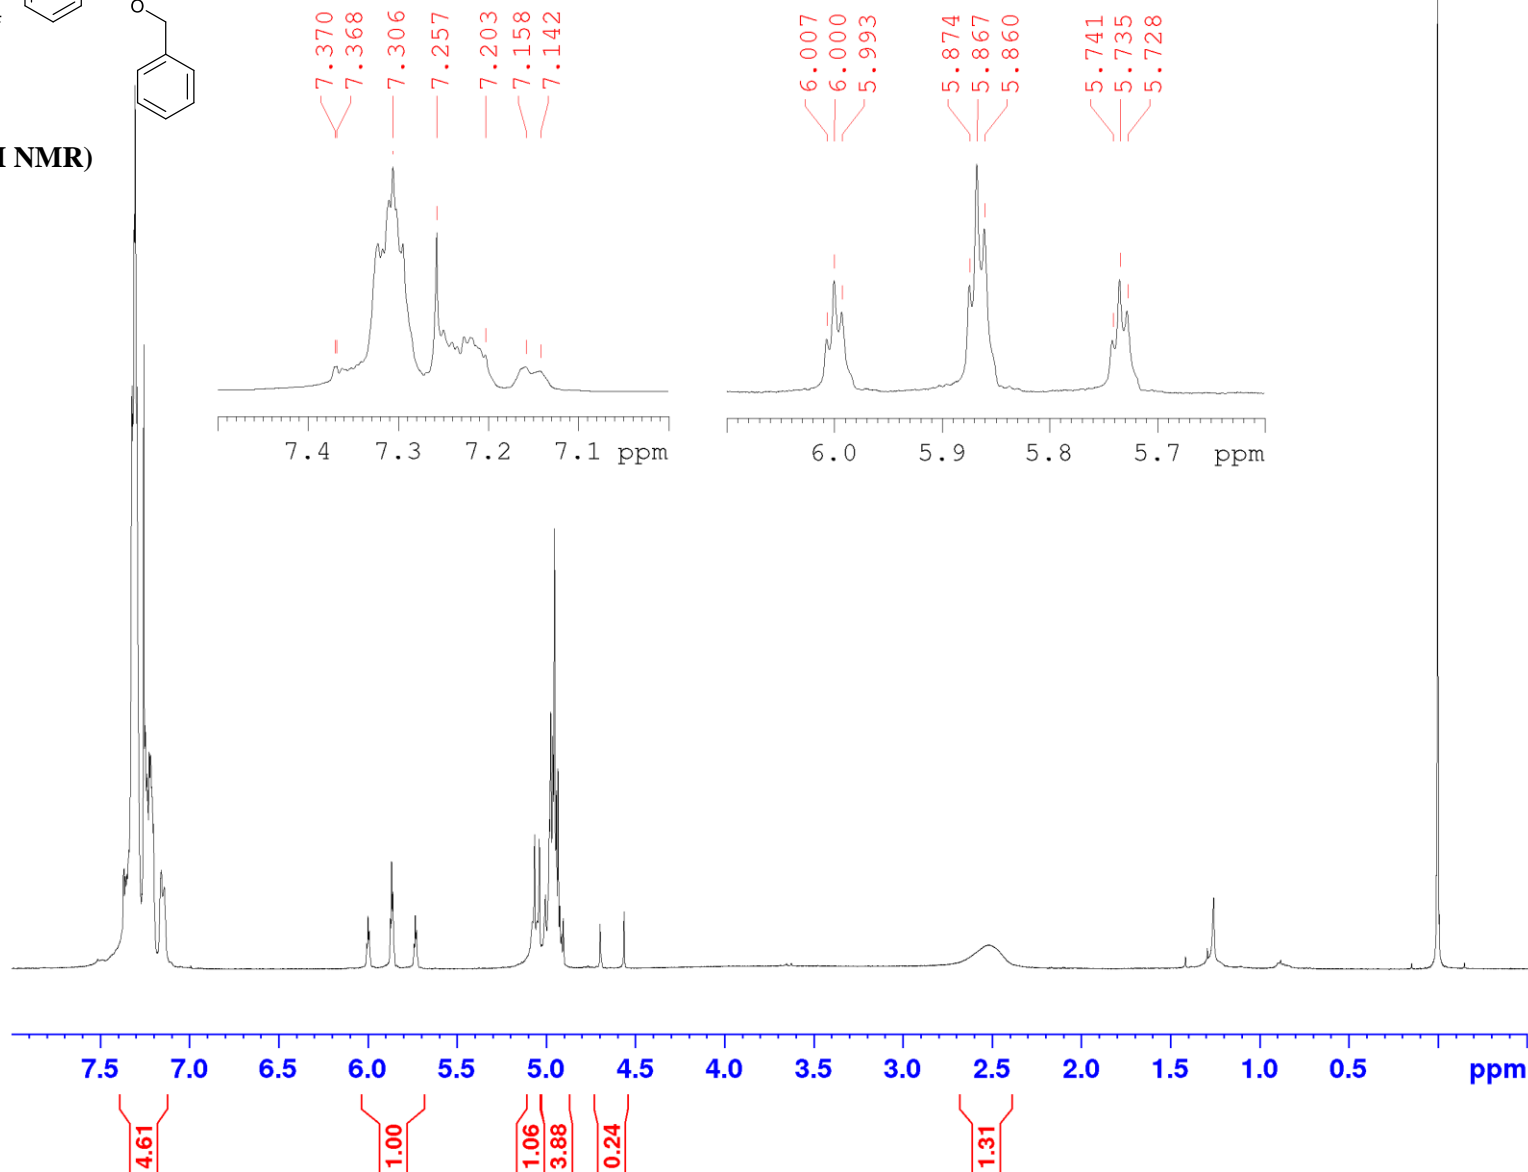

Current Data Parameters

NAME CD9  
EXPNO 1  
PROCNO 1

F2 - Acquisition Parameters

Date\_ 20190205  
Time 10.54 h  
INSTRUM spect  
PROBHD Z108618\_0921 (  
PULPROG zg30  
TD 65536  
SOLVENT CDC13  
NS 16  
DS 2  
SWH 8012.820 Hz  
FIDRES 0.244532 Hz  
AQ 4.0894465 sec  
RG 158.68  
DW 62.400 usec  
DE 6.50 usec  
TE 299.7 K  
D1 1.00000000 sec  
TD0 1  
SFO1 400.1624710 MHz  
NUC1 1H  
P1 14.00 usec  
PLW1 11.52400017 W

F2 - Processing parameters

SI 65536  
SF 400.1600108 MHz  
WDW EM  
SSB 0  
LB 0.30 Hz  
GB 0  
PC 1.00

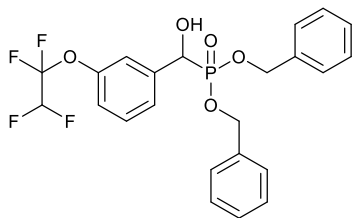

**10f (<sup>13</sup>C NMR)**

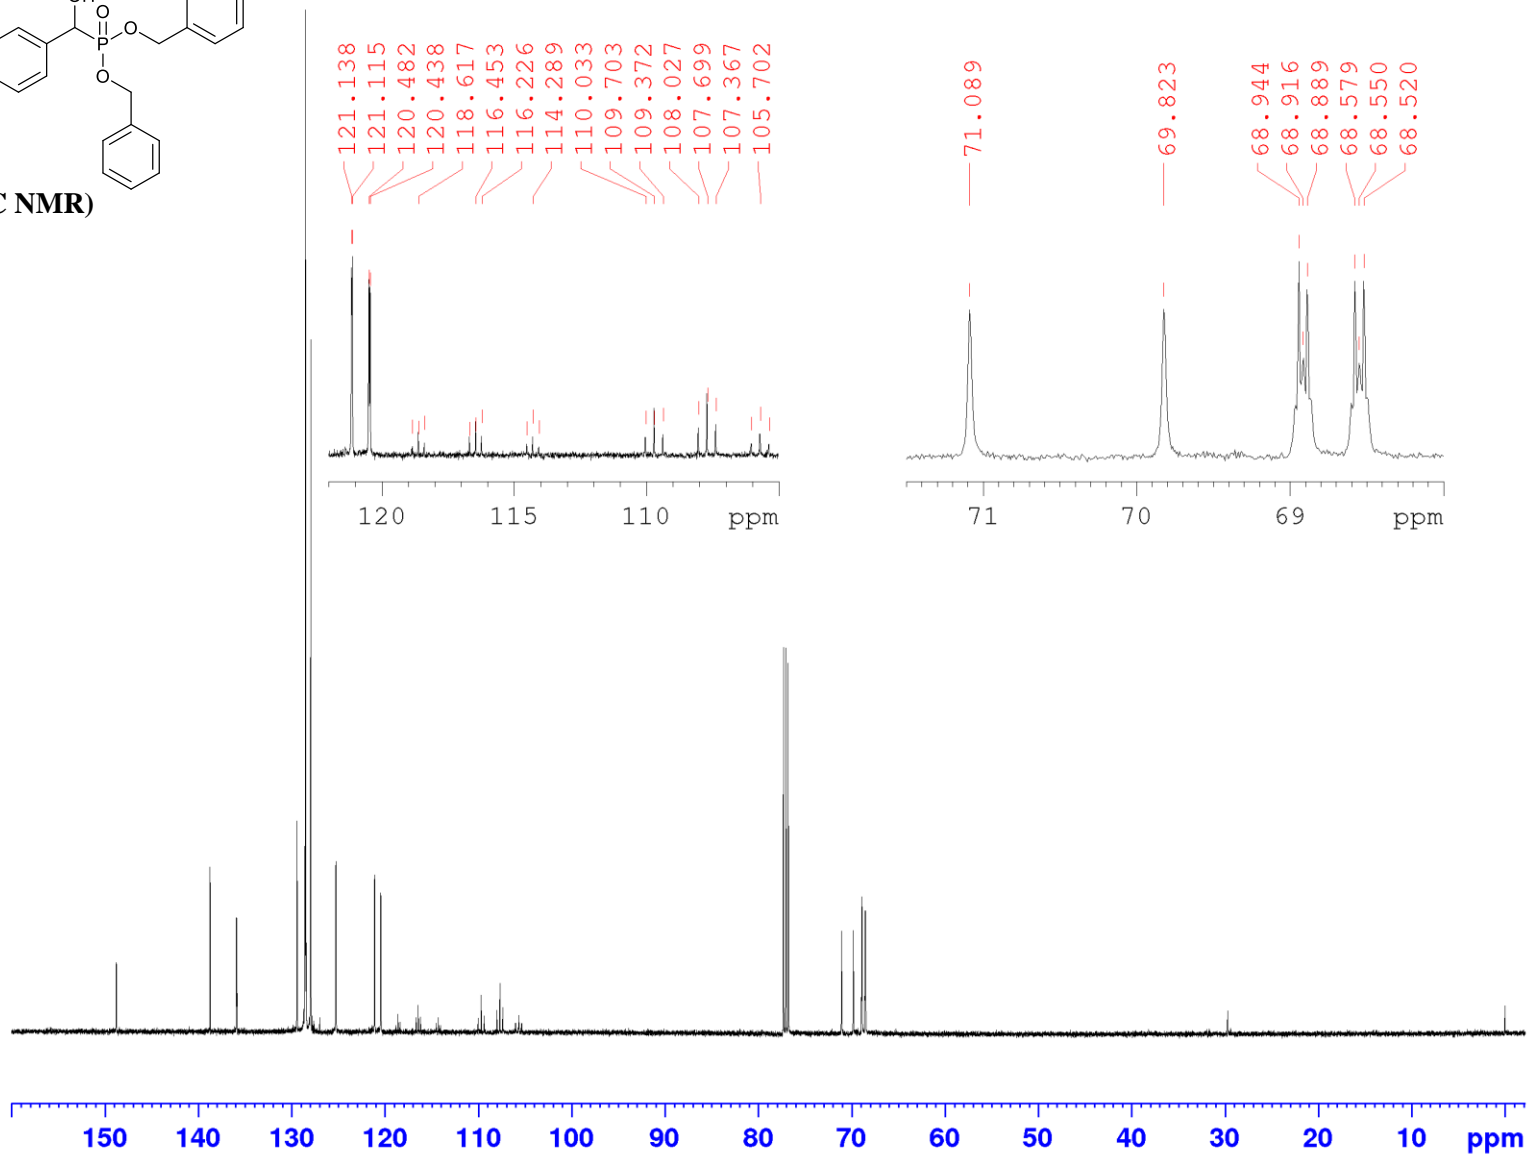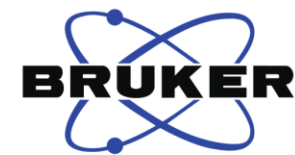

Current Data Parameters  
NAME CD2170330\_CD9\_Carbon01.fid  
EXPNO 1  
PROCNO 1

F2 - Processing parameters  
SI 32768  
SF 125.6600690 MHz  
WDW EM  
SSB 0  
LB 0.30 Hz  
GB 0  
PC 1.00

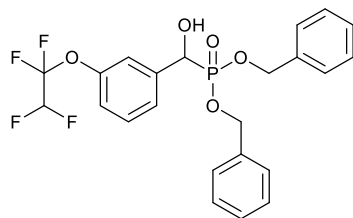

**10f ( $^{31}\text{P}$  NMR)**

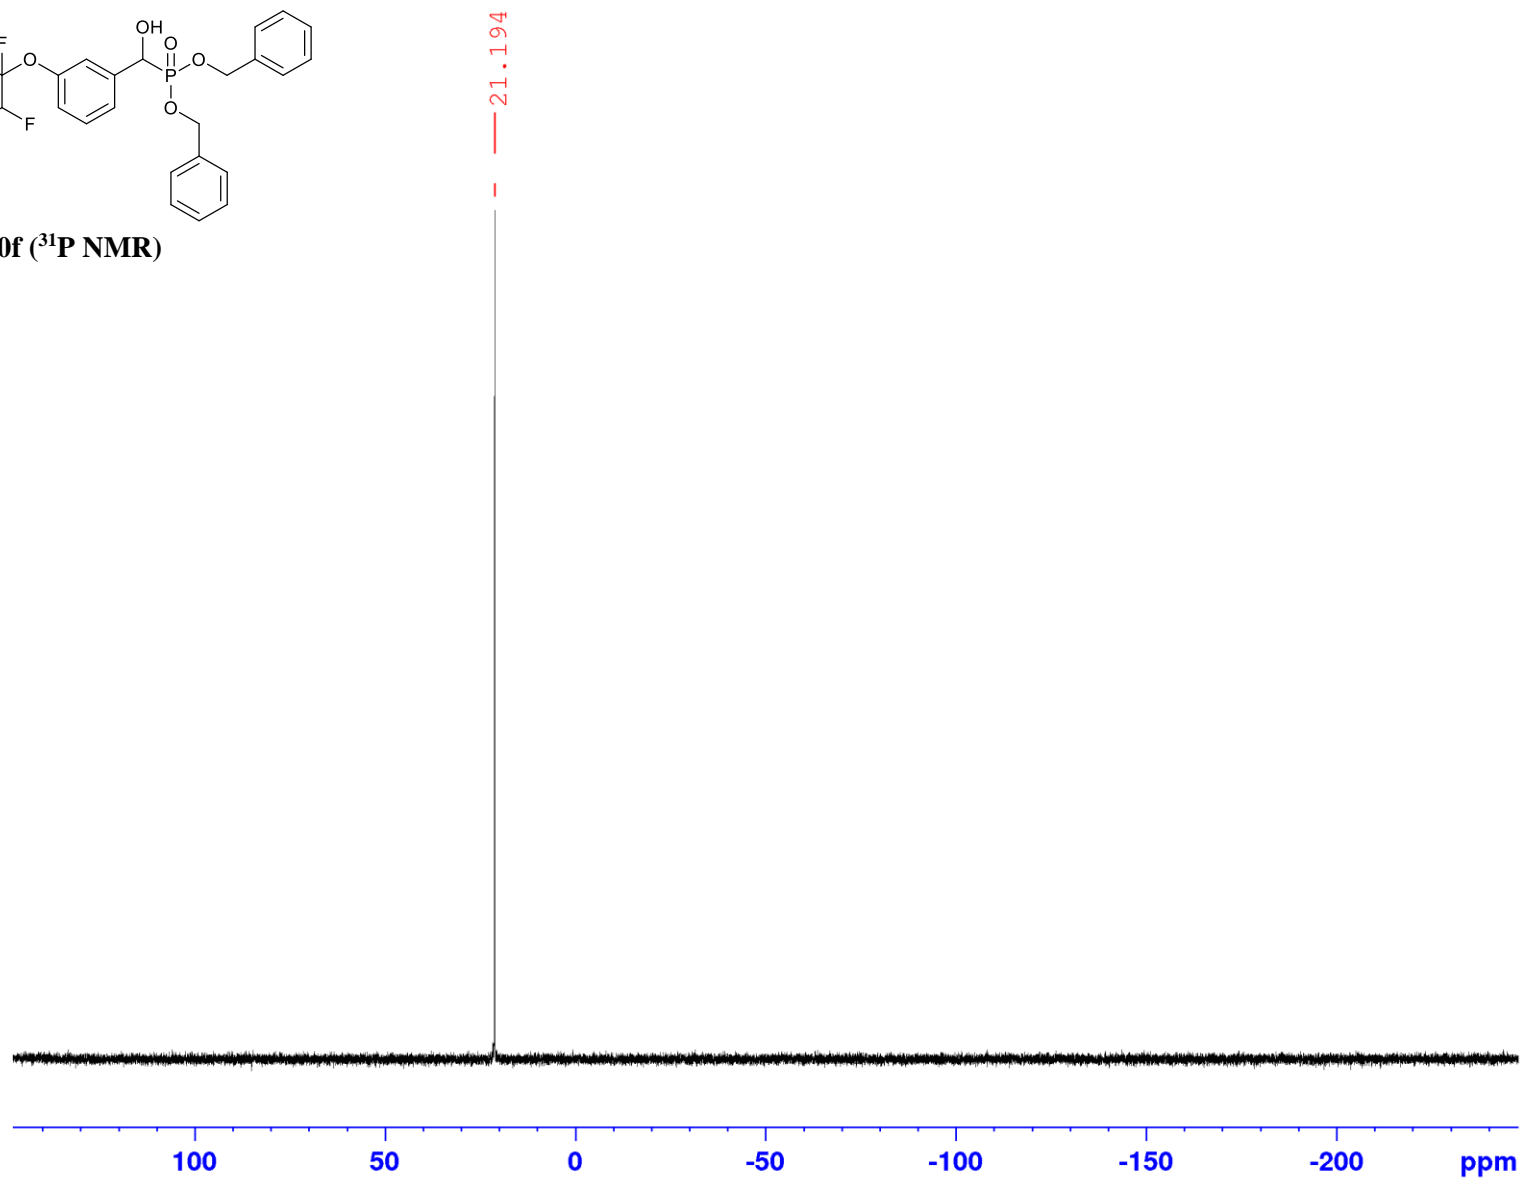

Current Data Parameters  
 NAME CD9  
 EXPNO 2  
 PROCNO 1

F2 - Acquisition Parameters  
 Date\_ 20190205  
 Time 10.57 h  
 INSTRUM spect  
 PROBHD Z108618\_0921 (  
 PULPROG zgpg30  
 TD 65536  
 SOLVENT CDCl3  
 NS 16  
 DS 4  
 SWH 64102.563 Hz  
 FIDRES 1.956255 Hz  
 AQ 0.5111808 sec  
 RG 196.38  
 DW 7.800 usec  
 DE 50.00 usec  
 TE 299.9 K  
 D1 2.00000000 sec  
 D11 0.03000000 sec  
 TD0 1  
 SFO1 161.9796378 MHz  
 NUC1  $^{31}\text{P}$   
 P1 15.00 usec  
 PLW1 11.77099991 W  
 SFO2 400.1616006 MHz  
 NUC2  $^1\text{H}$   
 CPDPRG[2] waltz16  
 PCPD2 90.00 usec  
 PLW2 11.52400017 W  
 PLW12 0.27886000 W  
 PLW13 0.14026000 W

F2 - Processing parameters  
 SI 32768  
 SF 161.9877372 MHz  
 WDW EM  
 SSB 0  
 LB 1.00 Hz  
 GB 0  
 PC 1.40

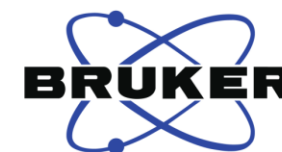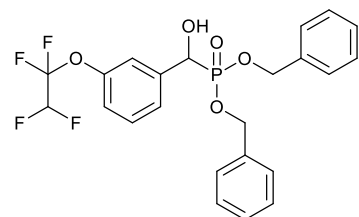

10f (<sup>19</sup>F NMR)

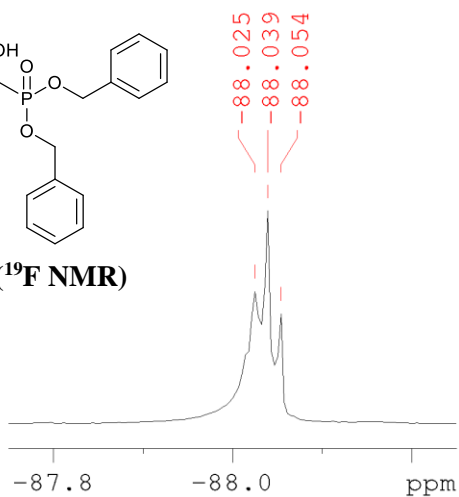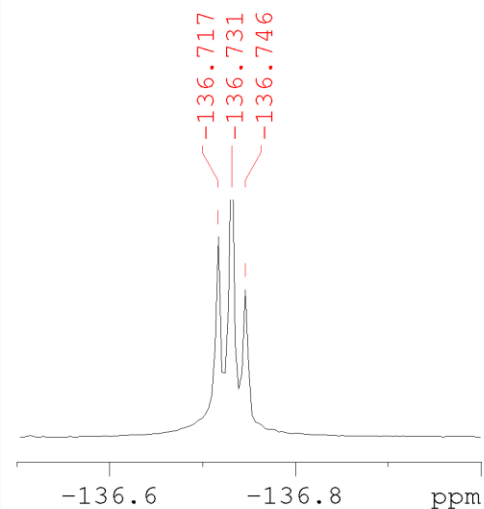

Current Data Parameters  
NAME CD9  
EXPNO 3  
PROCNO 1

F2 - Acquisition Parameters  
Date\_ 20190205  
Time 10.59 h  
INSTRUM spect  
PROBHD Z108618\_0921 (  
PULPROG zgfhigqn.2  
TD 131072  
SOLVENT CDCl3  
NS 16  
DS 4  
SWH 89285.711 Hz  
FIDRES 1.362392 Hz  
AQ 0.7340032 sec  
RG 196.38  
DW 5.600 usec  
DE 120.00 usec  
TE 299.8 K  
D1 1.00000000 sec  
D11 0.03000000 sec  
D12 0.00002000 sec  
TD0 1  
SFO1 376.4889418 MHz  
NUC1 19F  
P1 15.00 usec  
PLW1 17.75399971 W  
SFO2 400.1616006 MHz  
NUC2 1H  
CPDPRG[2] waltz16  
PCPD2 90.00 usec  
PLW2 11.52400017 W  
PLW12 0.27886000 W

F2 - Processing parameters  
SI 65536  
SF 376.5265944 MHz  
WDW EM  
SSB 0  
LB 0.30 Hz  
GB 0  
PC 1.00

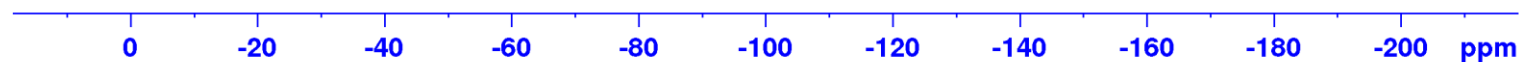

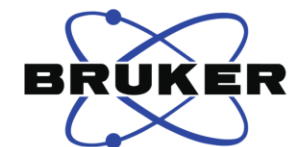

Current Data Parameters  
 NAME LH14 H  
 EXPNO 1  
 PROCNO 1

F2 - Acquisition Parameters  
 Date\_ 20180419  
 Time 15.10 h  
 INSTRUM spect  
 PROBHD Z108618\_0921 (   
 PULPROG zg30  
 TD 65536  
 SOLVENT CDCl3  
 NS 16  
 DS 2  
 SWH 8012.820 Hz  
 FIDRES 0.244532 Hz  
 AQ 4.0894465 sec  
 RG 6.39  
 DW 62.400 usec  
 DE 6.50 usec  
 TE 299.2 K  
 D1 1.00000000 sec  
 TD0 1  
 SFO1 400.1624710 MHz  
 NUC1 1H  
 P1 14.00 usec  
 PLW1 11.52400017 W

F2 - Processing parameters  
 SI 65536  
 SF 400.1600261 MHz  
 WDW EM  
 SSB 0  
 LB 0.30 Hz  
 GB 0  
 PC 1.00

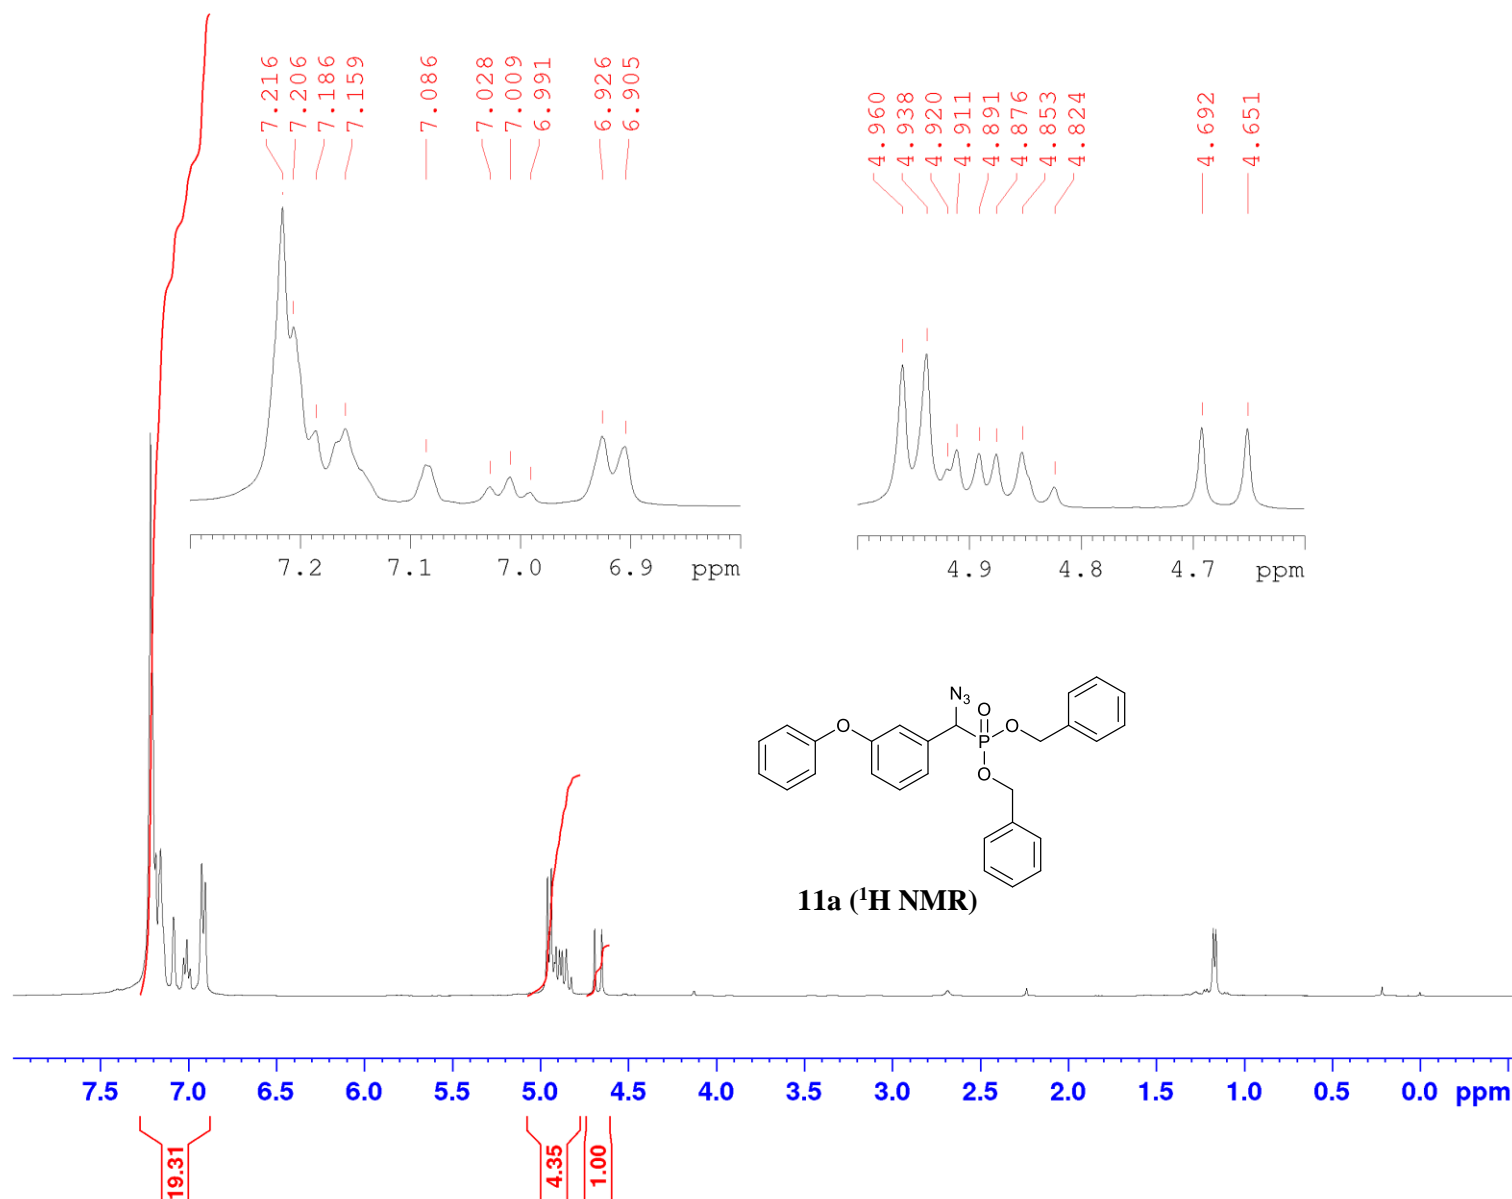

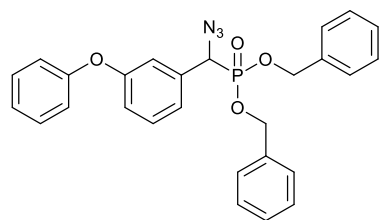

11a ( $^{13}\text{C}$  NMR)

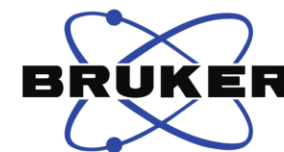

Current Data Parameters  
 NAME LH14 (C and P)  
 EXPNO 1  
 PROCNO 1

F2 - Acquisition Parameters  
 Date\_ 20180423  
 Time 17.30 h  
 INSTRUM spect  
 PROBHD Z108618\_0921 (  
 PULPROG zgpg30  
 TD 65536  
 SOLVENT CDCl3  
 NS 1024  
 DS 4  
 SWH 24038.461 Hz  
 FIDRES 0.733596 Hz  
 AQ 1.3631488 sec  
 RG 196.38  
 DW 20.800 usec  
 DE 6.50 usec  
 TE 301.4 K  
 D1 2.00000000 sec  
 D11 0.03000000 sec  
 TD0 1  
 SFO1 100.6303741 MHz  
 NUC1  $^{13}\text{C}$   
 P1 10.00 usec  
 PLW1 55.50099945 W  
 SFO2 400.1616006 MHz  
 NUC2  $^1\text{H}$   
 CPDPRG[2] waltz16  
 PCPD2 90.00 usec  
 PLW2 11.52400017 W  
 PLW12 0.27886000 W  
 PLW13 0.14026000 W

F2 - Processing parameters  
 SI 32768  
 SF 100.6203756 MHz  
 WDW EM  
 SSB 0  
 LB 1.00 Hz  
 GB 0  
 PC 1.40

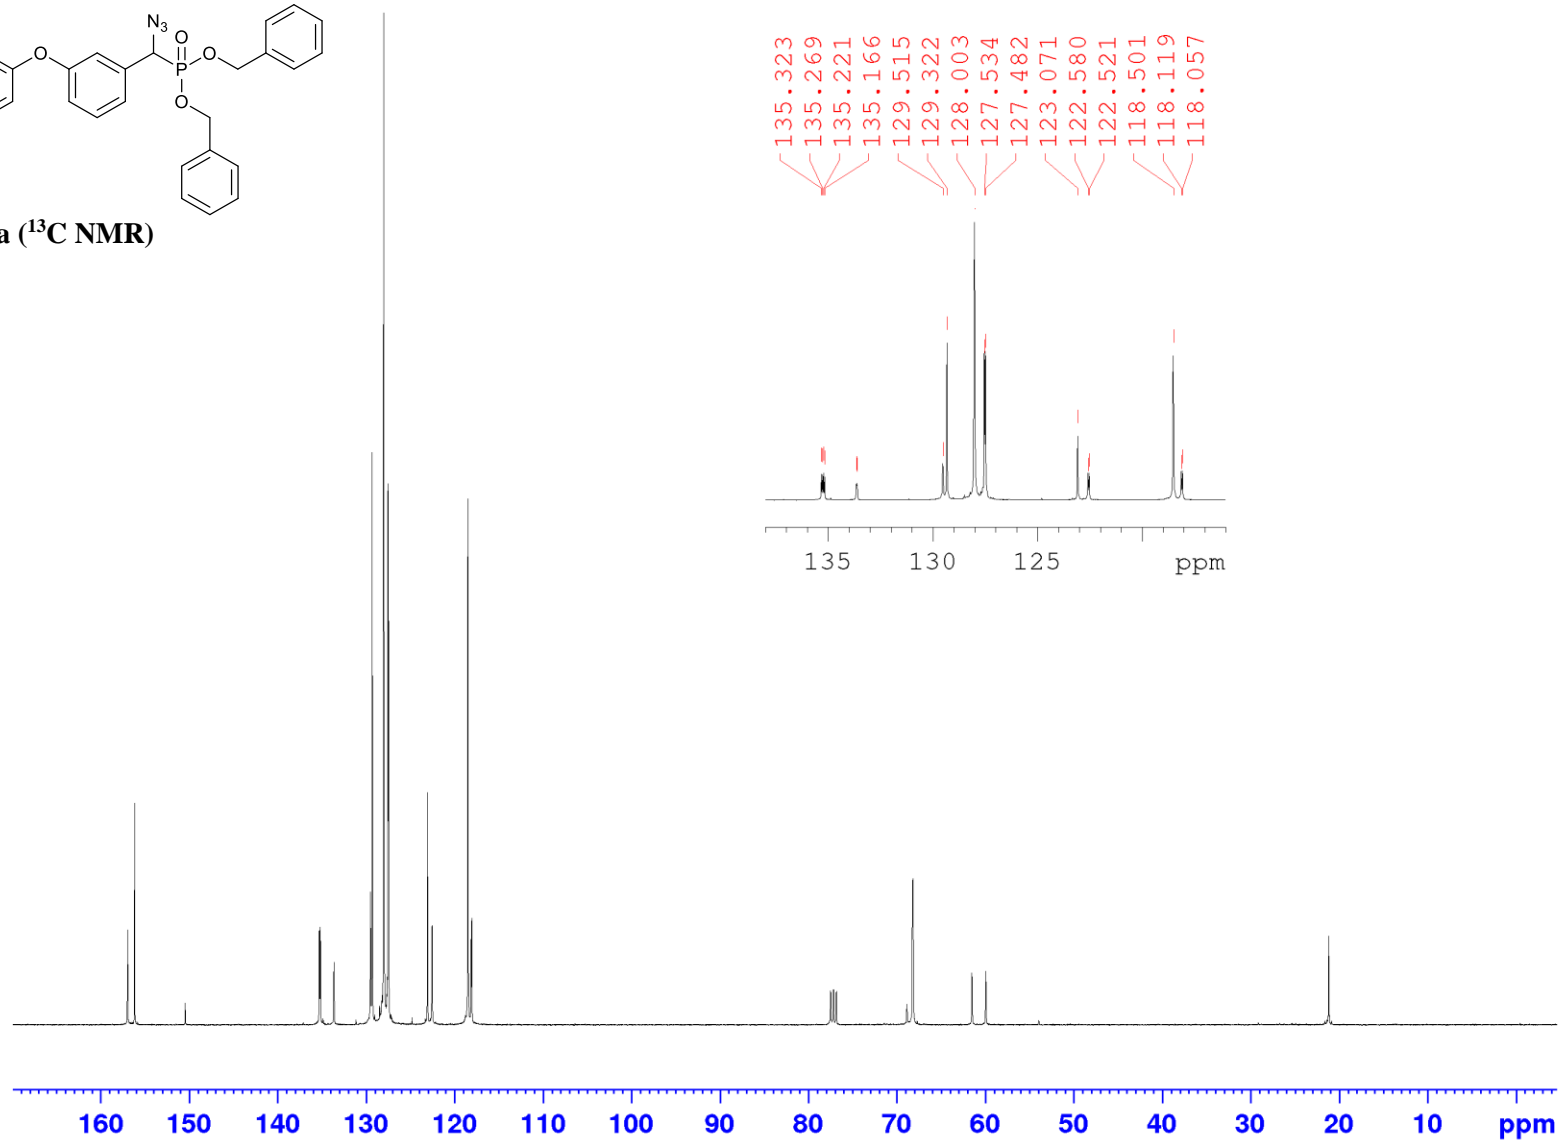

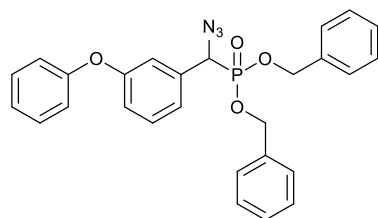

**11a (<sup>31</sup>P NMR)**

19.23

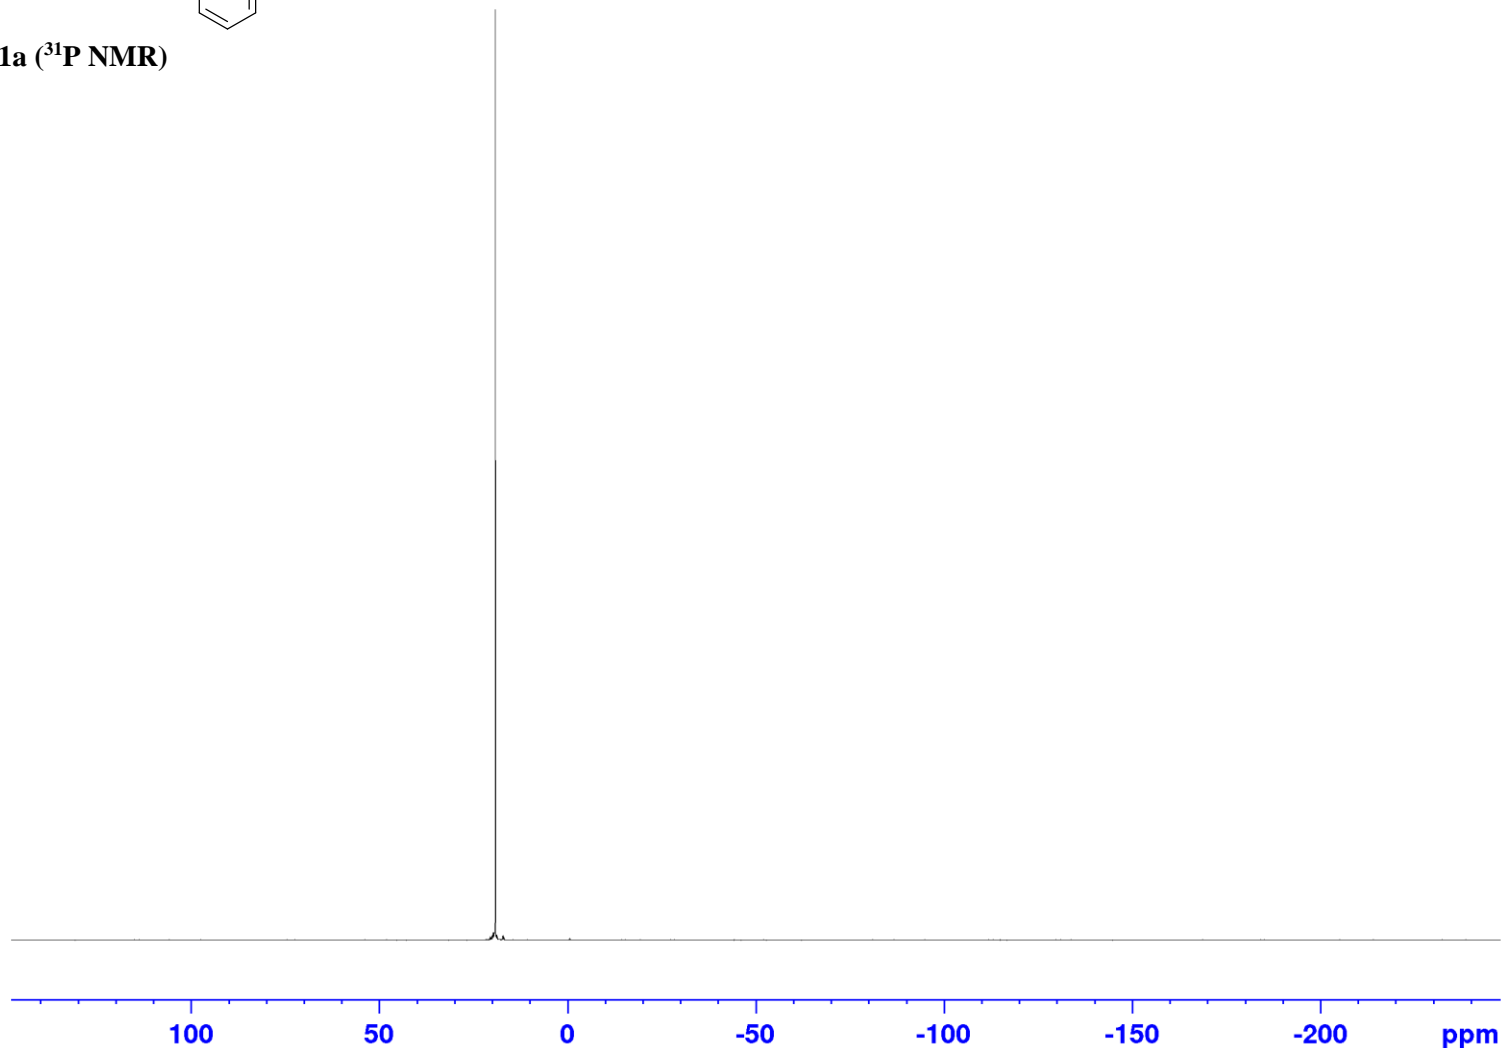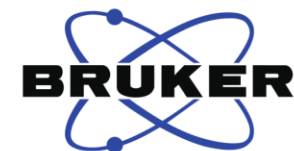

Current Data Parameters  
NAME LH14 (C and P)  
EXPNO 2  
PROCNO 1

F2 - Acquisition Parameters  
Date\_ 20180423  
Time 17.33 h  
INSTRUM spect  
PROBHD Z108618\_0921 (  
PULPROG zgpg30  
TD 65536  
SOLVENT CDCl3  
NS 16  
DS 4  
SWH 64102.563 Hz  
FIDRES 1.956255 Hz  
AQ 0.5111808 sec  
RG 196.38  
DW 7.800 use  
DE 6.50 use  
TE 301.1 K  
D1 2.00000000 sec  
D11 0.03000000 sec  
TD0 1  
SFO1 161.9796378 MHz  
NUC1 31P  
P1 15.00 use  
PLW1 11.77099991 W  
SFO2 400.1616006 MHz  
NUC2 1H  
CPDPRG[2] waltz16  
PCPD2 90.00 use  
PLW2 11.52400017 W  
PLW12 0.27886000 W  
PLW13 0.14026000 W

F2 - Processing parameters  
SI 32768  
SF 161.9877372 MHz  
WDW EM  
SSB 0  
LB 1.00 Hz  
GB 0  
PC 1.40

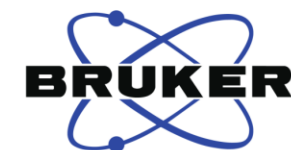

Current Data Parameters  
 NAME CD95 P3P36  
 EXPNO 1  
 PROCNO 1

F2 - Acquisition Parameters  
 Date\_ 20190801  
 Time 16.39 h  
 INSTRUM spect  
 PROBHD Z108618\_0921 (  
 PULPROG zg30  
 TD 65536  
 SOLVENT CDCl3  
 NS 16  
 DS 2  
 SWH 8012.820 Hz  
 FIDRES 0.244532 Hz  
 AQ 4.0894465 sec  
 RG 30.94  
 DW 62.400 usec  
 DE 6.50 usec  
 TE 298.1 K  
 D1 1.00000000 sec  
 TD0 1  
 SFO1 400.1624710 MHz  
 NUC1 1H  
 P1 14.00 usec  
 PLW1 11.52400017 W

F2 - Processing parameters  
 SI 65536  
 SF 400.1600137 MHz  
 WDW EM  
 SSB 0  
 LB 0.30 Hz  
 GB 0  
 PC 1.00

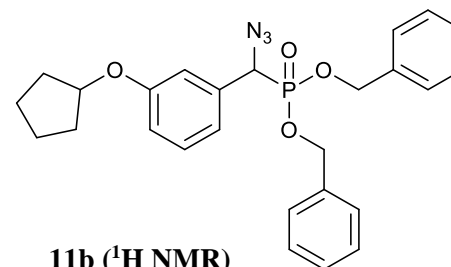

11b (<sup>1</sup>H NMR)

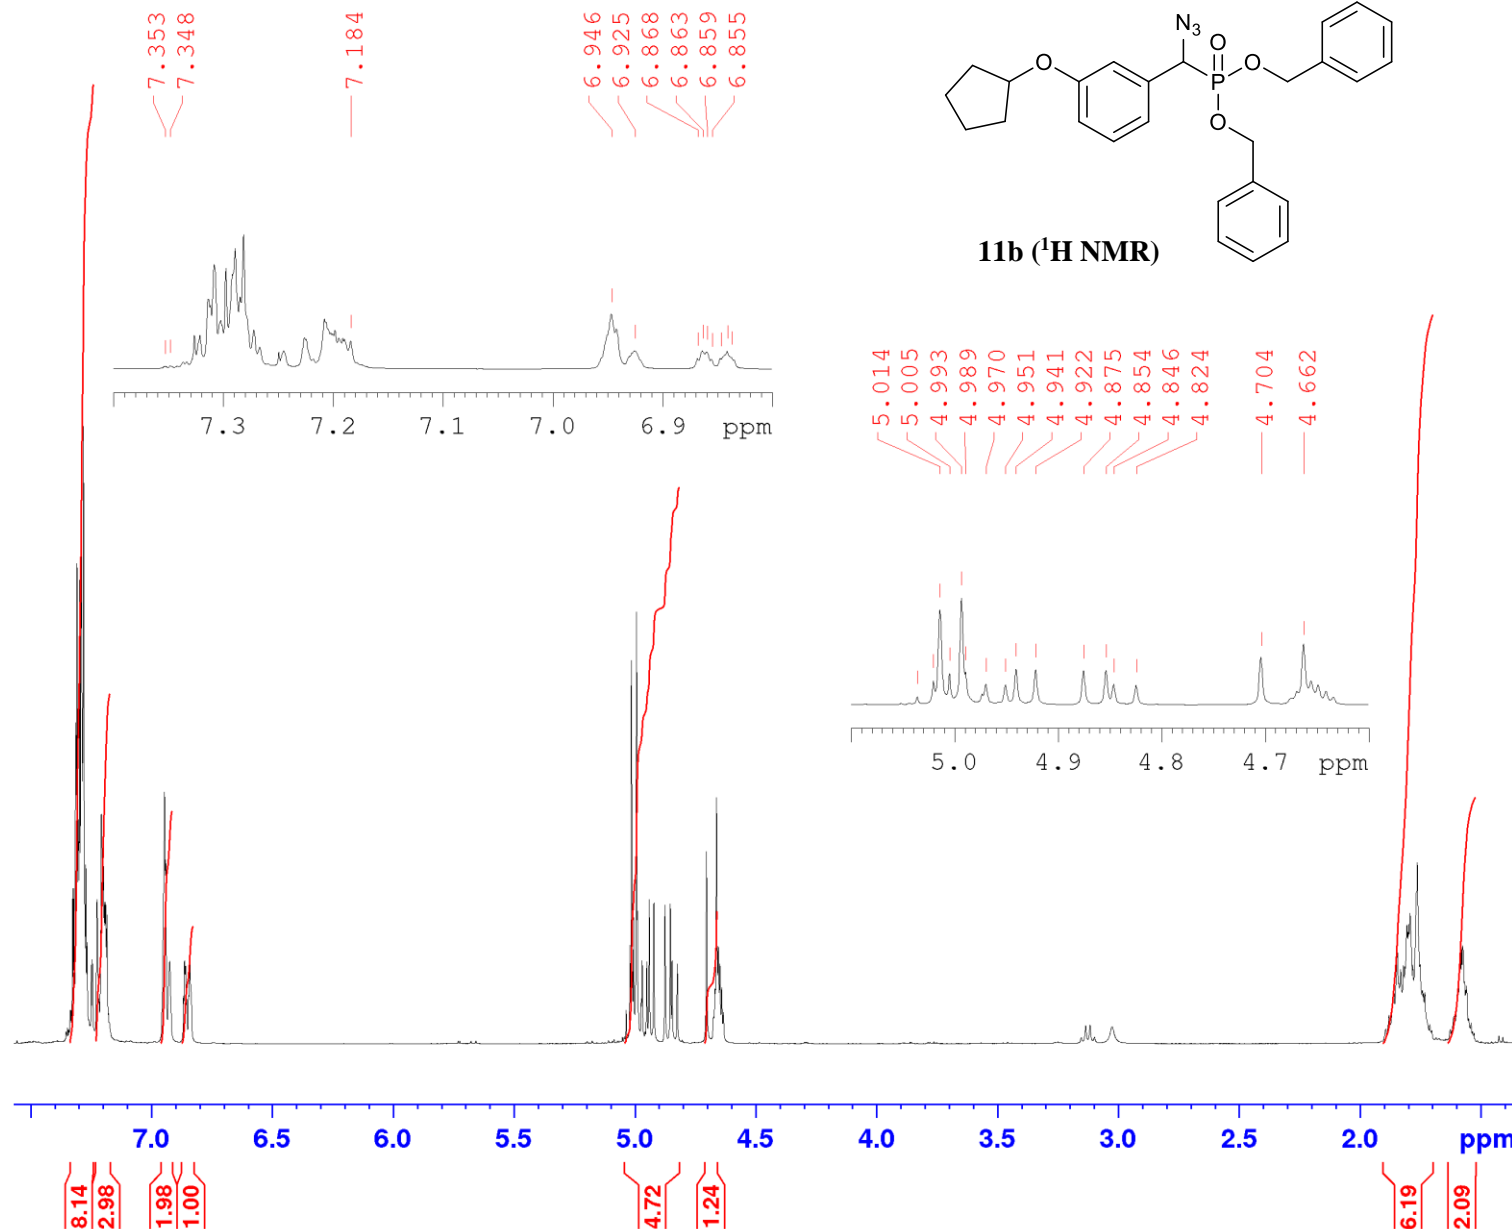

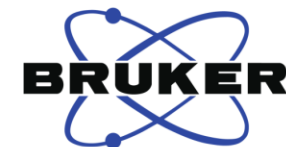

Current Data Parameters  
 NAME CD95 P3P36  
 EXPNO 2  
 PROCNO 1

F2 - Acquisition Parameters  
 Date\_ 20190802  
 Time 4.15 h  
 INSTRUM spect  
 PROBHD Z108618\_0921 (  
 PULPROG zgpg30  
 TD 65536  
 SOLVENT CDCl3  
 NS 2300  
 DS 4  
 SWH 24038.461 Hz  
 FIDRES 0.733596 Hz  
 AQ 1.3631488 sec  
 RG 196.38  
 DW 20.800 usec  
 DE 6.50 usec  
 TE 298.6 K  
 D1 2.00000000 sec  
 D11 0.03000000 sec  
 TD0 1  
 SFO1 100.6303741 MHz  
 NUC1 13C  
 P1 10.00 usec  
 PLW1 55.50099945 W  
 SFO2 400.1616006 MHz  
 NUC2 1H  
 CPDPRG[2] waltz16  
 PCPD2 90.00 usec  
 PLW2 11.52400017 W  
 PLW12 0.27886000 W  
 PLW13 0.14026000 W

F2 - Processing parameters  
 SI 32768  
 SF 100.6203157 MHz  
 WDW EM  
 SSB 0  
 LB 1.00 Hz  
 GB 0  
 PC 1.40

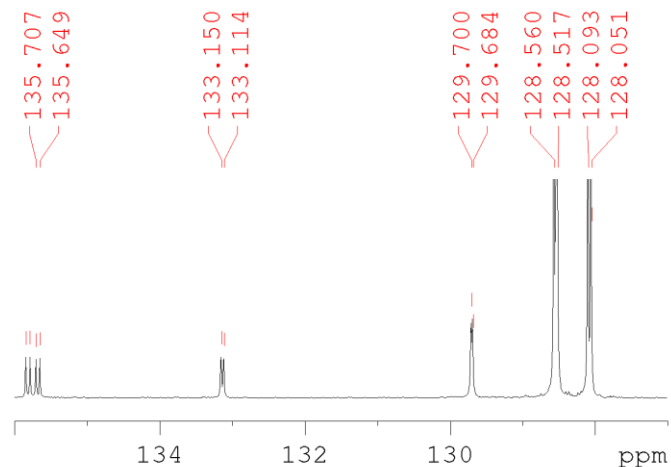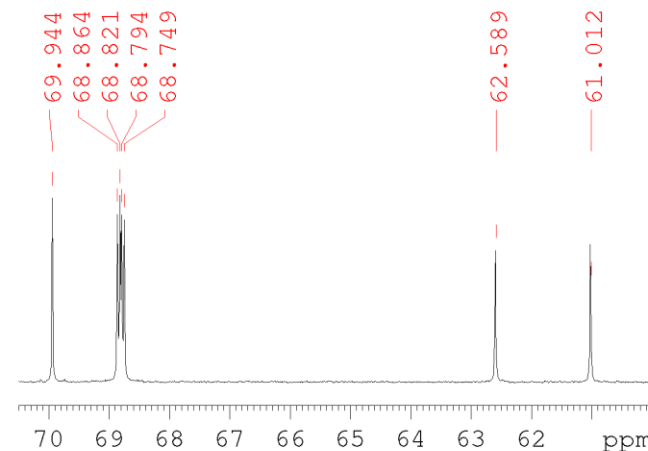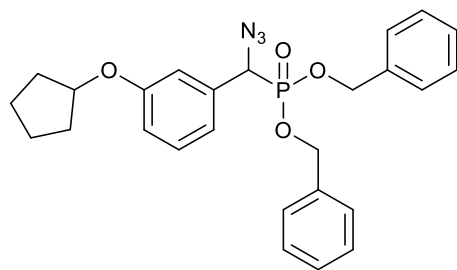

**11b (<sup>13</sup>C NMR)**

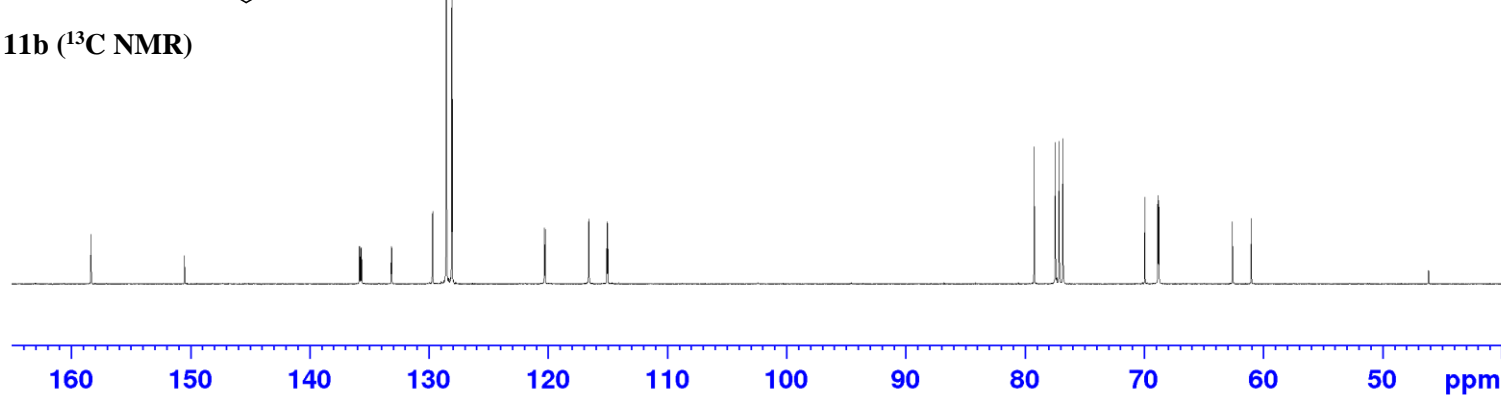

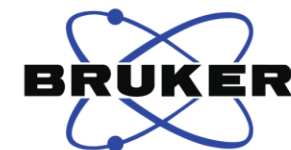

Current Data Parameters  
NAME CD95 P3P36  
EXPNO 6  
PROCNO 1

F2 - Acquisition Parameters  
Date\_ 20190802  
Time 6.07 h  
INSTRUM spect  
PROBHD Z108618\_0921 (  
PULPROG zg30  
TD 65536  
SOLVENT CDCl3  
NS 4  
DS 0  
SWH 64102.563 Hz  
FIDRES 1.956255 Hz  
AQ 0.5111808 sec  
RG 196.38  
DW 7.800 usec  
DE 50.00 usec  
TE 299.2 K  
D1 2.00000000 sec  
TD0 1  
SFO1 161.9796378 MHz  
NUC1 31P  
P1 15.00 usec  
PLW1 11.77099991 W

F2 - Processing parameters  
SI 32768  
SF 161.9877372 MHz  
WDW EM  
SSB 0  
LB 1.00 Hz  
GB 0  
PC 1.40

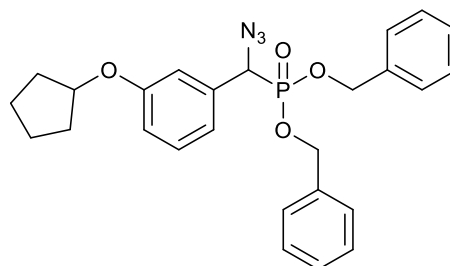

11b ( $^{31}\text{P}$  NMR)

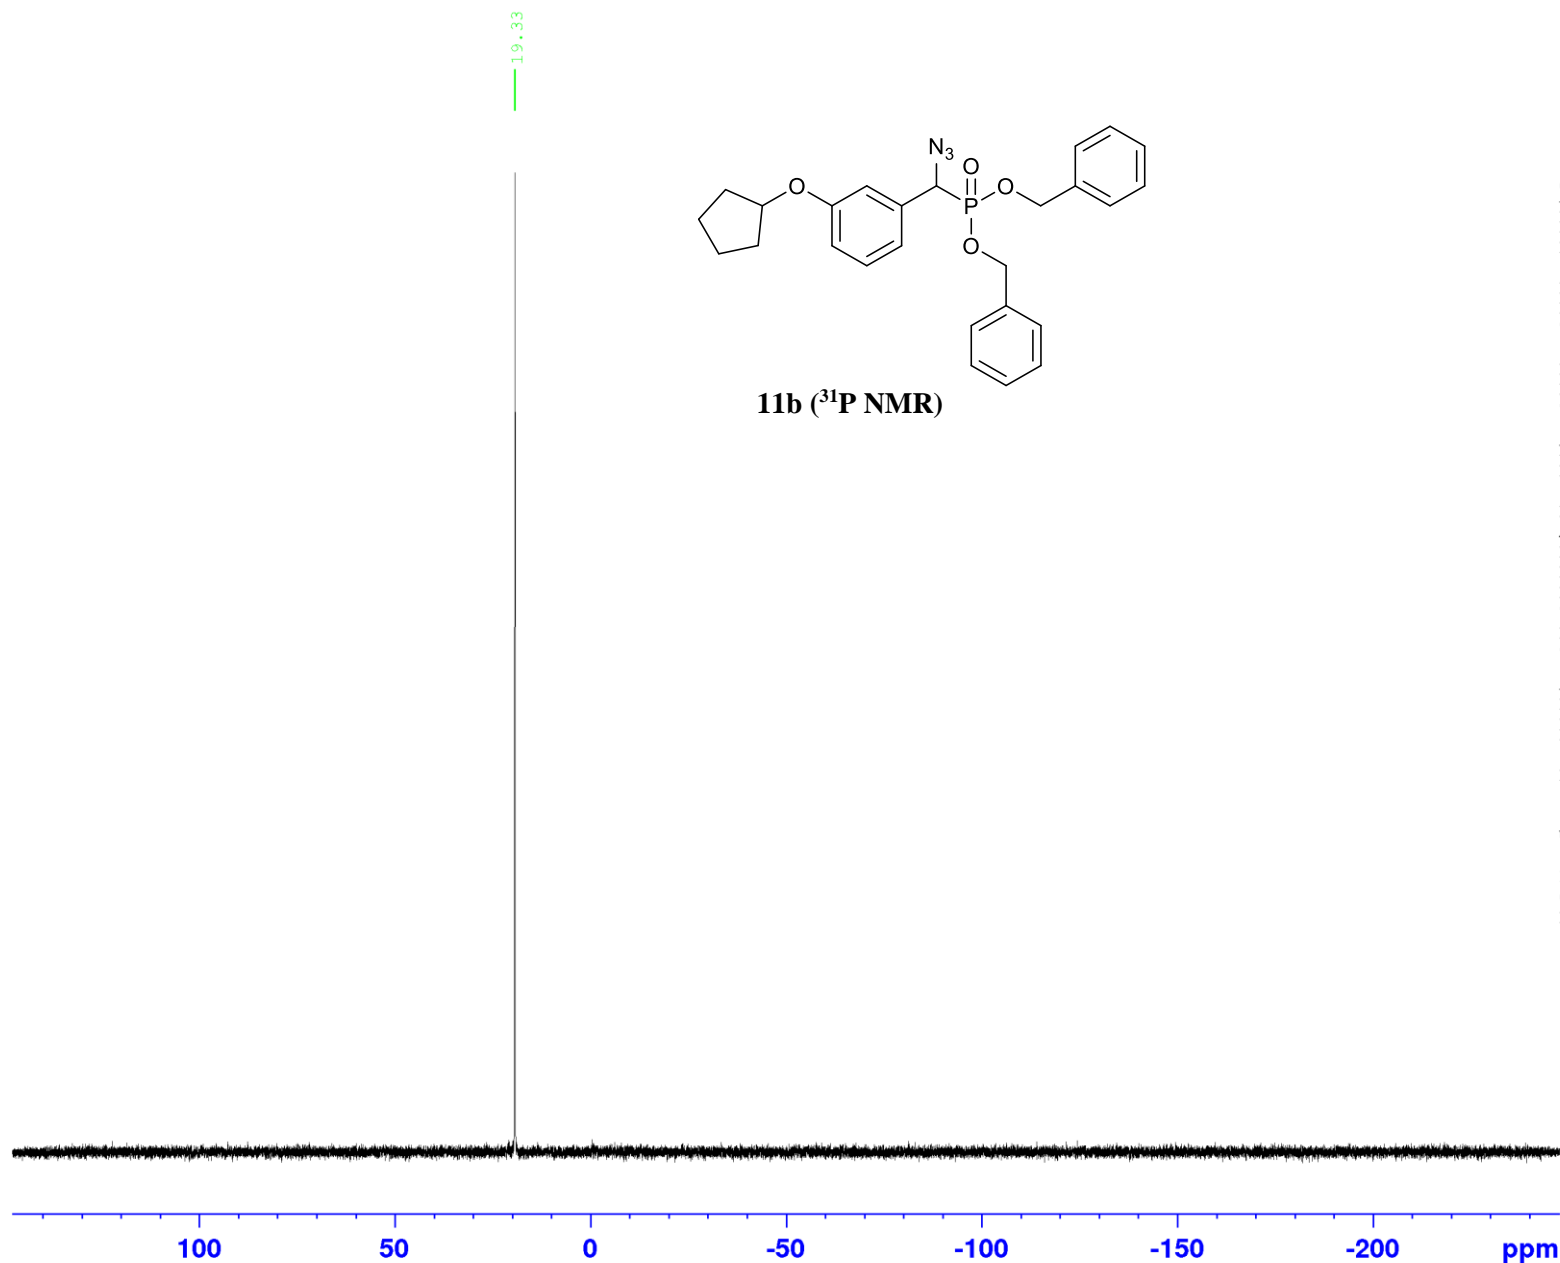

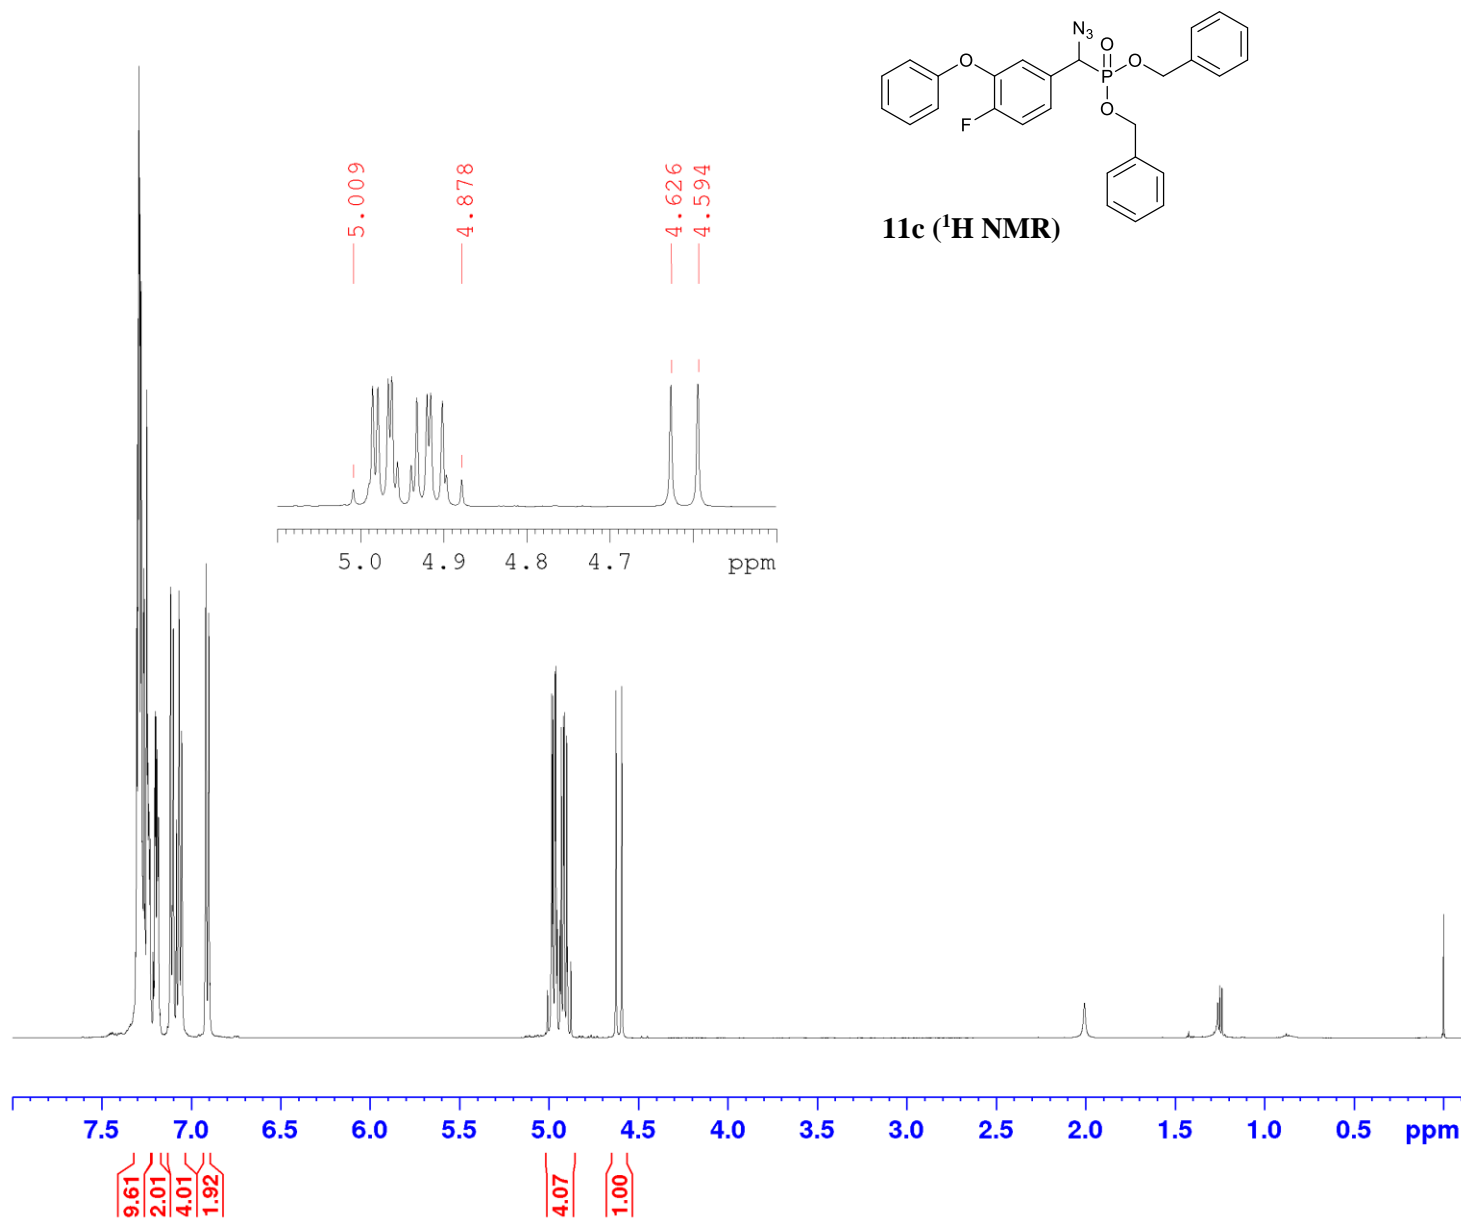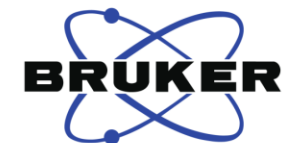

Current Data Parameters  
NAME CD58  
EXPNO 1  
PROCNO 1

F2 - Acquisition Parameters  
Date\_ 20180427  
Time 10.57 h  
INSTRUM CAB AV4 500 MHZ BASIC  
PROBHD Z150364\_0005 (zq30)  
PULPROG zg30  
TD 65536  
SOLVENT CDCl3  
NS 16  
DS 2  
SWH 10000.000 Hz  
FIDRES 0.305176 Hz  
AQ 3.2767999 sec  
RG 10.9863  
DW 50.000 usec  
DE 16.23 usec  
TE 298.0 K  
D1 1.00000000 sec  
TD0 1  
SFO1 499.7470859 MHz  
NUC1 1H  
P1 12.00 usec  
PLW1 15.53100014 W

F2 - Processing parameters  
SI 65536  
SF 499.7440342 MHz  
WDW EM  
SSB 0  
LB 0.30 Hz  
GB 0  
PC 1.00

155.25  
153.28  
153.26  
144.07  
143.97  
135.60  
135.55  
135.49  
135.45  
129.79  
128.89  
128.86  
128.83  
128.67  
128.61  
128.59  
128.13  
128.08  
124.50  
124.45  
124.40  
123.52  
121.45  
121.41  
117.54  
117.34  
117.33  
117.19  
117.18

77.38  
77.12  
76.87  
68.94  
68.88  
68.83  
61.51  
60.24

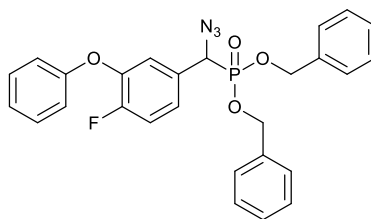

**11c (<sup>13</sup>C NMR)**

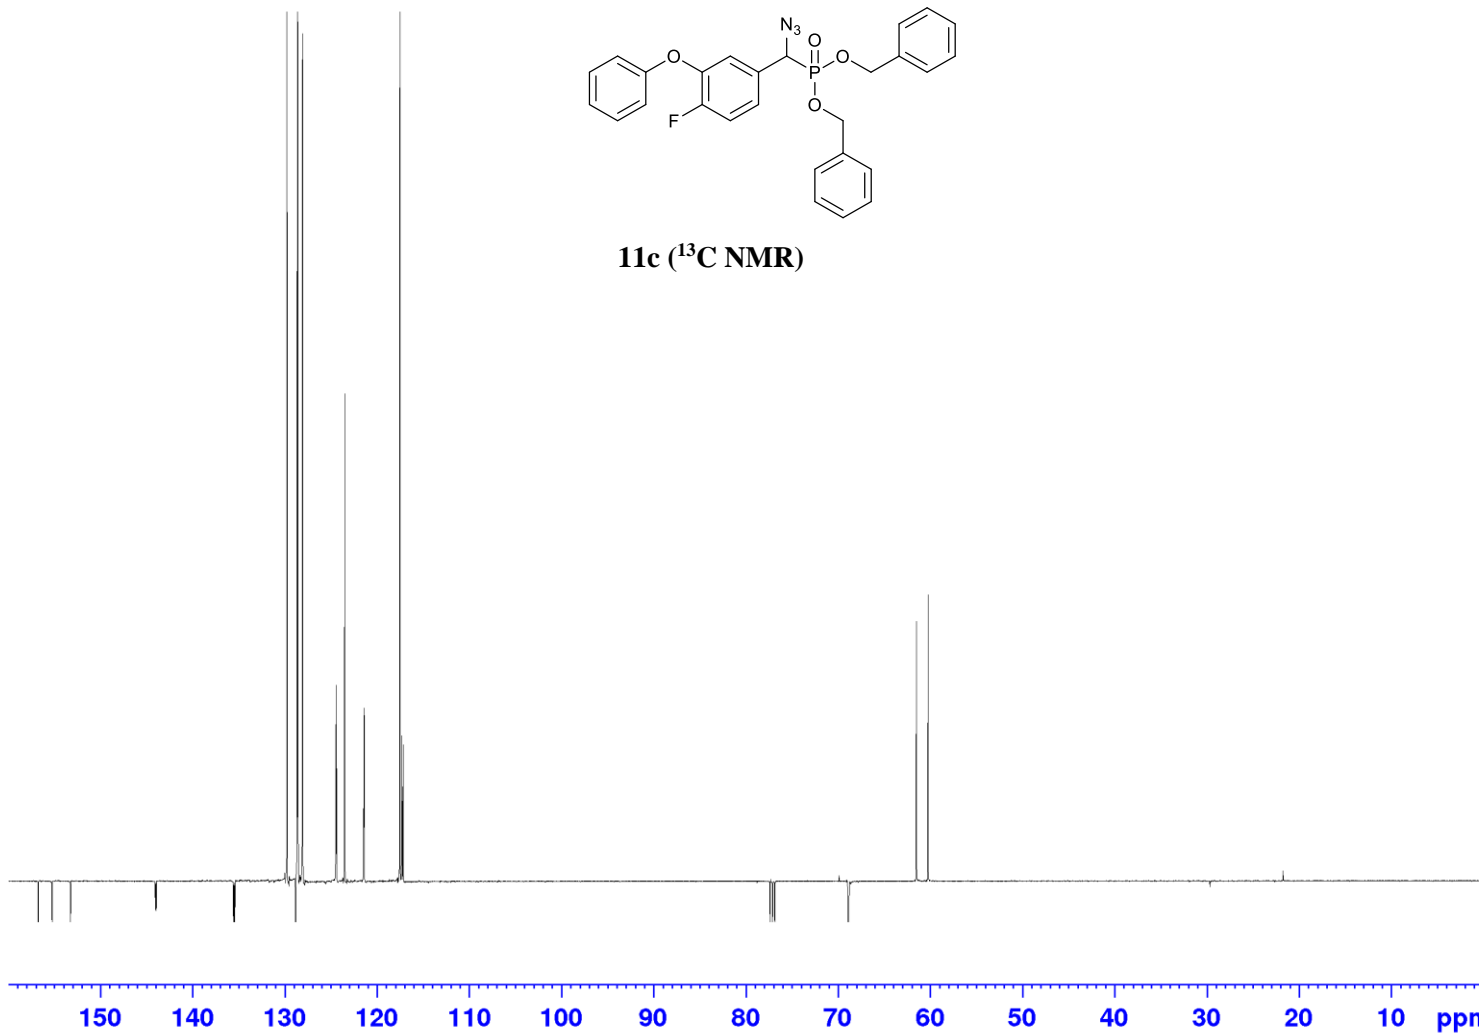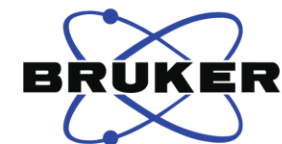

Current Data Parameters  
NAME CD58  
EXPNO 2  
PROCNO 1

F2 - Acquisition Parameters  
Date\_ 20180427  
Time 11.25 h  
INSTRUM CAB AV4 500 MHZ BASIC  
PROBHD Z150364\_0005 (PULPROG  
PULPROG deptgpgpp  
TD 65536  
SOLVENT CDCl3  
NS 512  
DS 8  
SWH 30120.482 Hz  
FIDRES 0.919204 Hz  
AQ 1.0878977 sec  
RG 101  
DW 16.600 usec  
DE 18.00 usec  
TE 298.0 K  
CNST2 145.0000000  
D1 2.00000000 sec  
D2 0.00344828 sec  
D12 0.00002000 sec  
D16 0.00020000 sec  
TD0 1  
SF01 125.6732948 MHz  
NUC1 13C  
P1 10.00 usec  
P13 2000.00 usec  
PLW0 0 W  
PLW1 51.23600006 W  
SPNAM[5] Crp60comp.4  
SPOAL5 0.500  
SPOFFS5 0 Hz  
SPW5 7.82830000 W  
SFO2 499.7459990 MHz  
NUC2 1H  
CNST12 1.5000000  
CFDPRG[2] waltz16  
P0 18.00 usec  
P3 12.00 usec  
P4 24.00 usec  
PCPD2 80.00 usec  
PLW2 15.53100014 W  
PLW12 0.34306911 W  
GPNAM[1] SMSQ10.100  
GPZ1 31.00 %  
GPNAM[2] SMSQ10.100  
GPZ2 31.00 %  
GPNAM[3] SMSQ10.100  
GPZ3 31.00 %  
P16 1000.00 usec

F2 - Processing parameters  
SI 32768  
SF 125.6607401 MHz  
WDW EM  
SSB 0  
LB 1.00 Hz  
GB 0  
PC 1.40

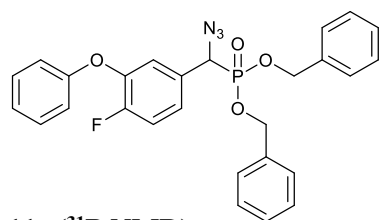

**11c ( $^{31}\text{P}$  NMR)**

18.85  
18.83

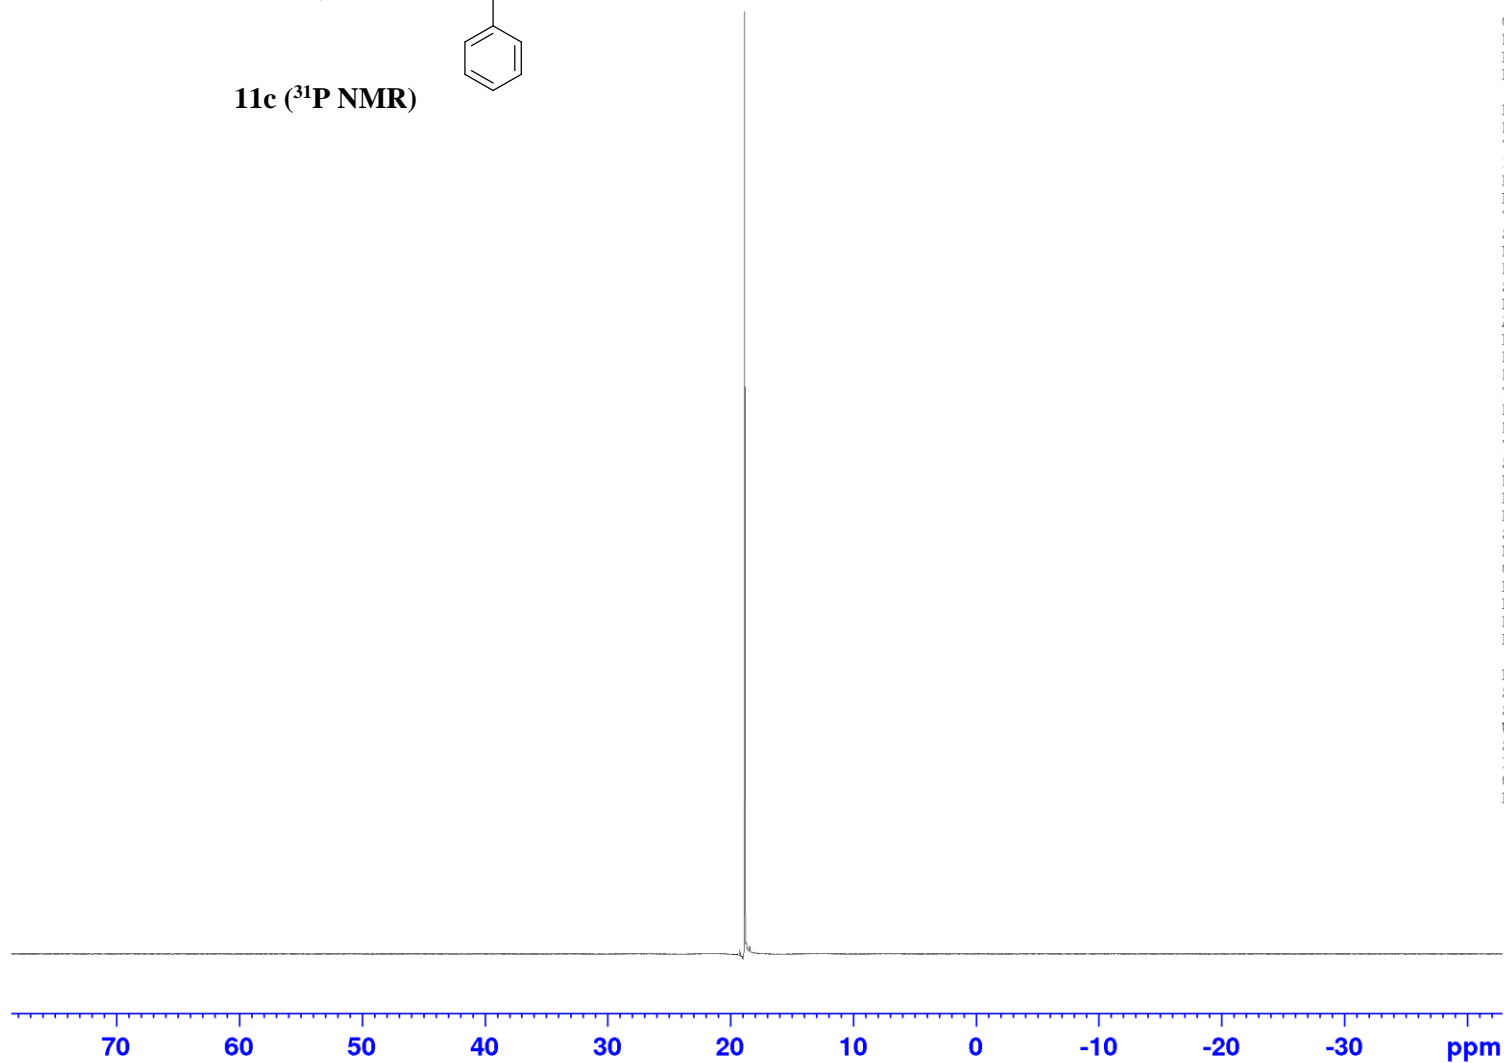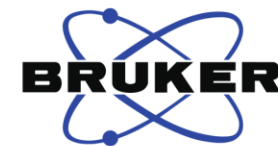

Current Data Parameters  
NAME CD58  
EXPNO 3  
PROCNO 1

F2 - Acquisition Parameters  
Date\_ 20180427  
Time 11.27 h  
INSTRUM CAB AV4 500 MHZ BASIC  
PROBHD Z150364\_0005 {  
PULPROG zgpg30  
TD 65536  
SOLVENT CDC13  
NS 16  
DS 4  
SWH 81967.211 Hz  
FIDRES 2.501441 Hz  
AQ 0.3997696 sec  
RG 101  
DW 6.100 usec  
DE 18.00 usec  
TE 298.0 K  
D1 2.00000000 sec  
D11 0.03000000 sec  
TD0 1  
SFO1 202.2899643 MHz  
NUC1  $^{31}\text{P}$   
P1 12.00 usec  
PLW1 45.76100159 W  
SFO2 499.7459990 MHz  
NUC2  $^1\text{H}$   
CPDPRG2 waltz16  
PCPD2 80.00 usec  
PLW2 15.53100014 W  
PLW12 0.34306911 W  
PLW13 0.17194620 W

F2 - Processing parameters  
SI 32768  
SF 202.3000793 MHz  
WDW EM  
SSB 0  
LB 1.00 Hz  
GB 0  
PC 1.40

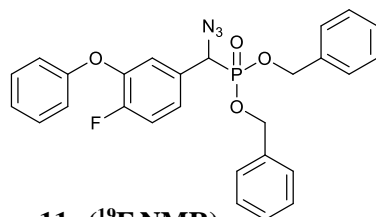

**11c ( $^{19}\text{F}$  NMR)**

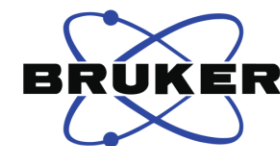

Current Data Parameters  
 NAME 19F  
 EXPNO 5  
 PROCNO 1

F2 - Acquisition Parameters  
 Date\_ 20180413  
 Time 22.41 h  
 INSTRUM spect  
 PROBHD Z108618\_0921 (  
 PULPROG zgflqn  
 TD 131072  
 SOLVENT CDCl3  
 NS 16  
 DS 4  
 SWH 89285.711 Hz  
 FIDRES 1.362392 Hz  
 AQ 0.7340032 sec  
 RG 196.38  
 DW 5.600 usec  
 DE 6.50 usec  
 TE 298.4 K  
 D1 1.00000000 sec  
 TD0 1  
 SFO1 376.4889418 MHz  
 NUC1 19F  
 P1 15.00 usec  
 PLW1 17.75399971 W

F2 - Processing parameters  
 SI 65536  
 SF 376.5265944 MHz  
 WDW EM  
 SSB 0  
 LB 0.30 Hz  
 GB 0  
 PC 1.00

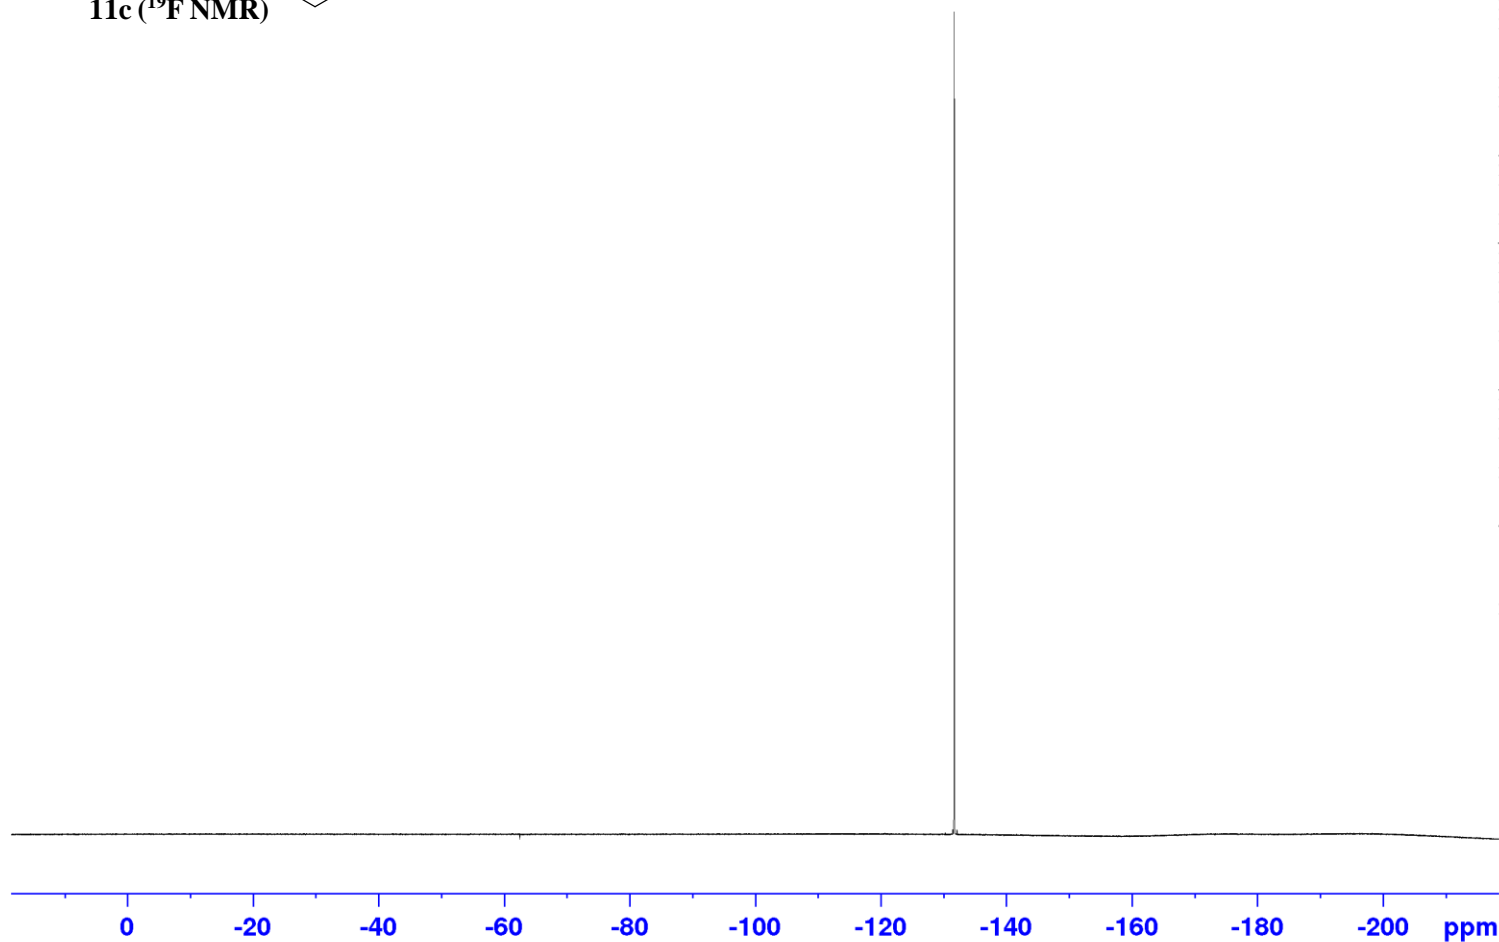

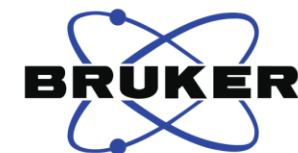

Current Data Parameters  
 NAME CD84  
 EXPNO 1  
 PROCNO 1

F2 - Acquisition Parameters  
 Date\_ 20190411  
 Time 17.07 h  
 INSTRUM CAB AV4 500 MHZ BASIC  
 PROBHD Z150364\_0005 (zg30)  
 PULPROG zg30  
 TD 65536  
 SOLVENT CDCl3  
 NS 16  
 DS 2  
 SWH 10000.000 Hz  
 FIDRES 0.305176 Hz  
 AQ 3.2767999 sec  
 RG 14.6484  
 DW 50.000 usec  
 DE 16.23 usec  
 TE 298.0 K  
 D1 1.00000000 sec  
 TD0 1  
 SF01 499.7470859 MHz  
 NUC1 1H  
 P1 12.00 usec  
 PLW1 15.53100014 W

F2 - Processing parameters  
 SI 65536  
 SF 499.7440222 MHz  
 WDW EM  
 SSB 0  
 LB 0.30 Hz  
 GB 0  
 PC 1.00

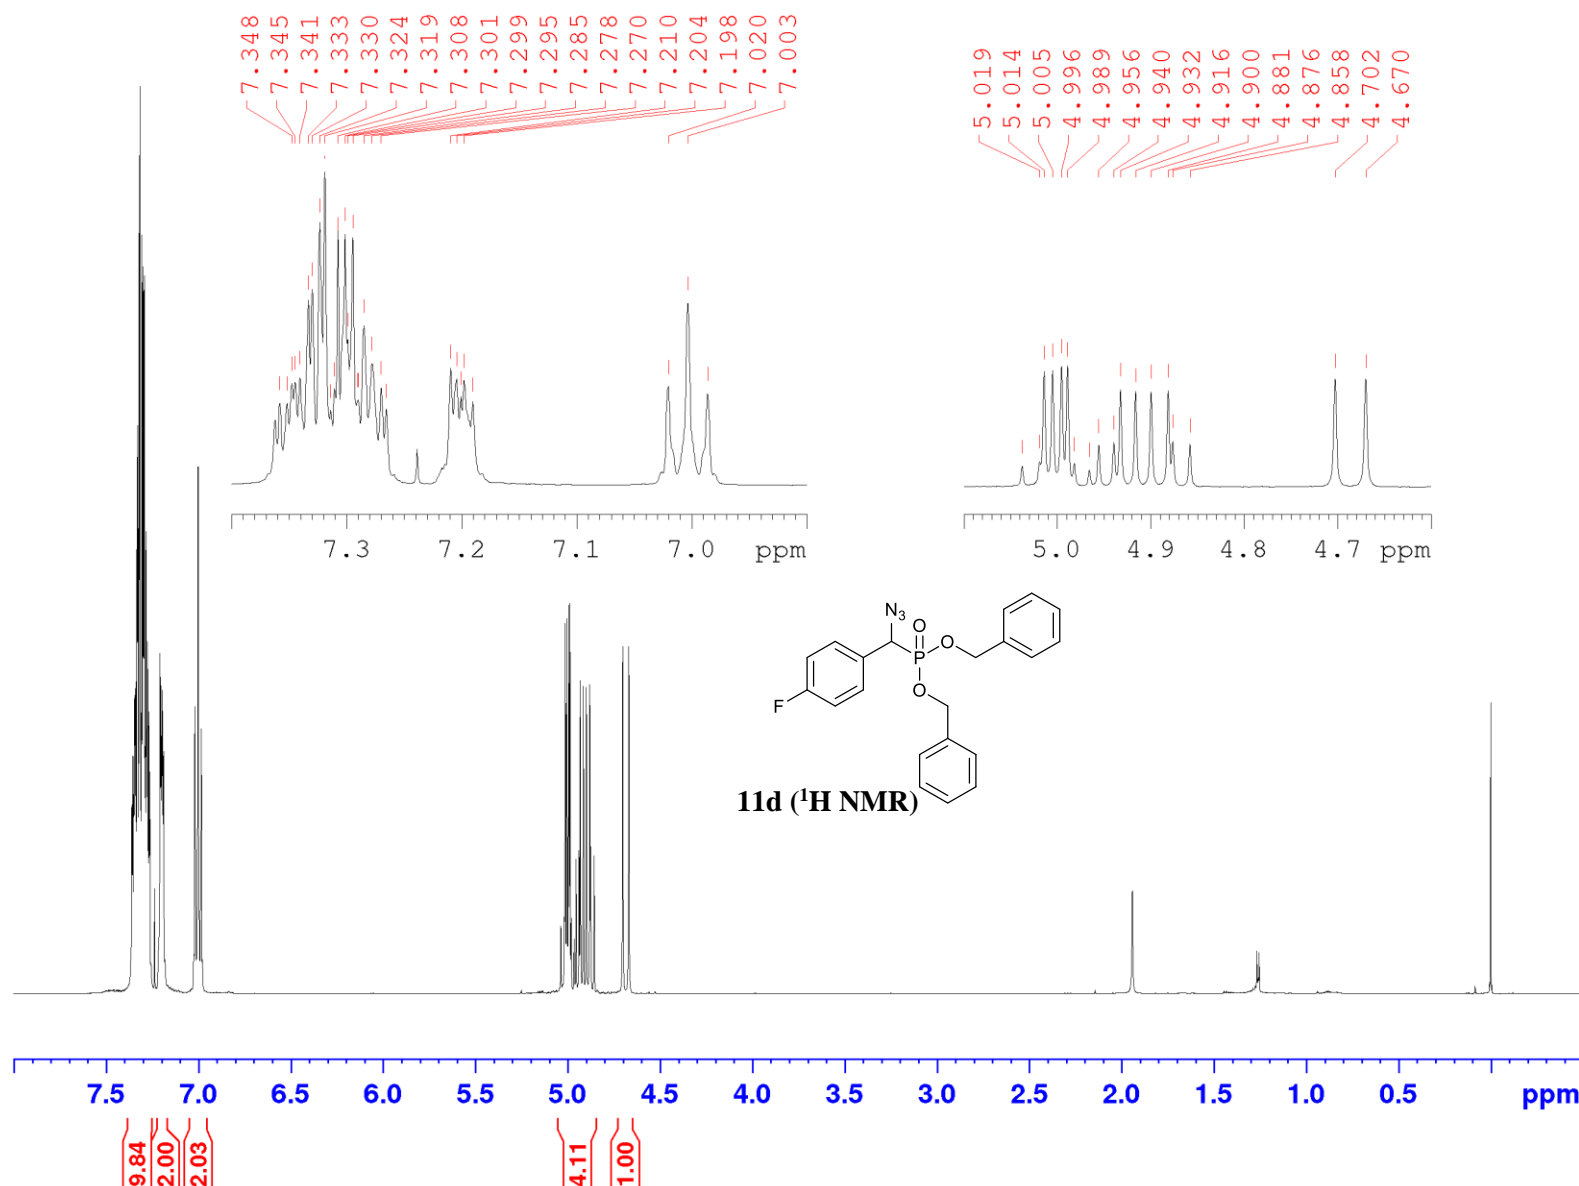

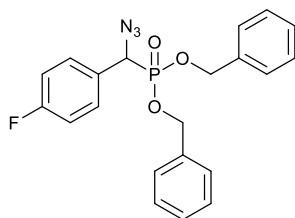

**11d ( $^{13}\text{C}$  NMR)**

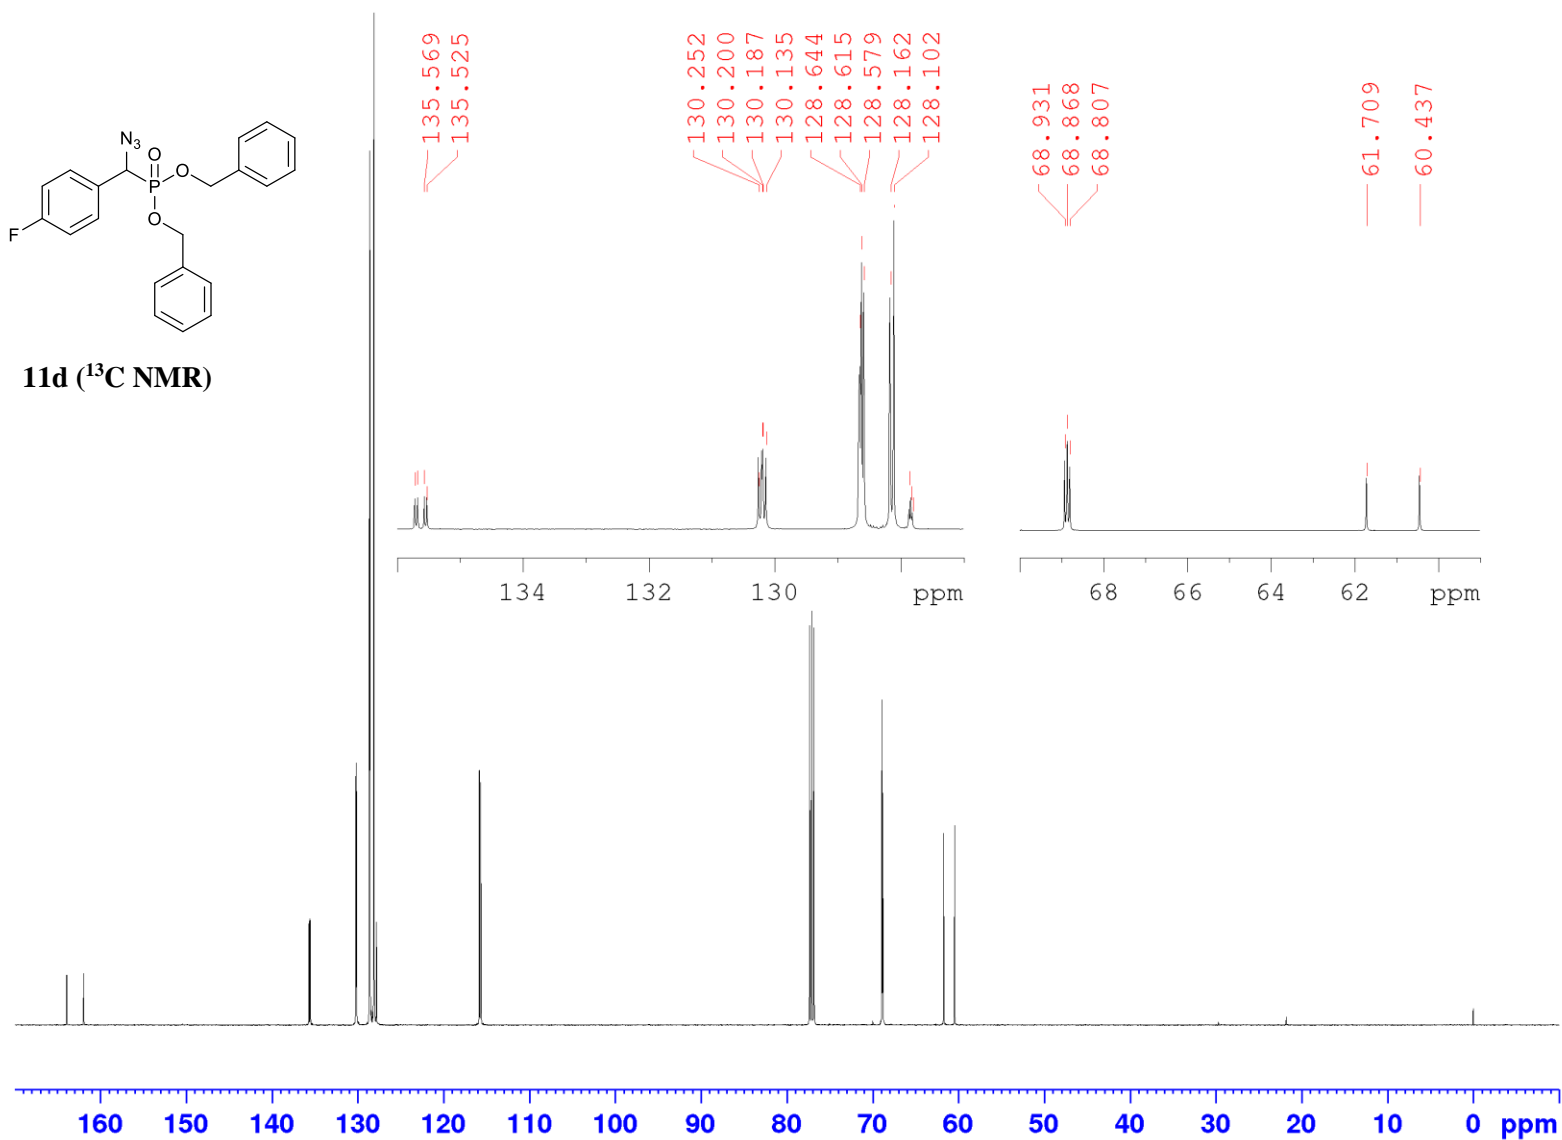

Current Data Parameters  
NAME CD84  
EXPNO 2  
PROCNO 1

F2 - Acquisition Parameters  
Date\_ 20190412  
Time 0.52 h  
INSTRUM CAB AV4 500 MHZ BASIC  
PROBHD Z150364\_0005 (  
PULPROG zgpg30  
TD 65536  
SOLVENT CDCl3  
NS 2048  
DS 4  
SWH 30120.482 Hz  
FIDRES 0.919204 Hz  
AQ 1.0878977 sec  
RG 101  
DW 16.600 usec  
DE 18.00 usec  
TE 298.0 K  
D1 2.00000000 sec  
D11 0.03000000 sec  
TD0 1  
SFO1 125.6732948 MHz  
NUC1 13C  
P1 10.00 usec  
PLW1 51.23600006 W  
SFO2 499.7459990 MHz  
NUC2 1H  
CPDPRG[2] waltz16  
PCPD2 80.00 usec  
PLW2 15.53100014 W  
PLW12 0.34944999 W  
PLW13 0.17549001 W

F2 - Processing parameters  
SI 32768  
SF 125.6607342 MHz  
WDW EM  
SSB 0  
LB 1.00 Hz  
GB 0  
PC 1.40

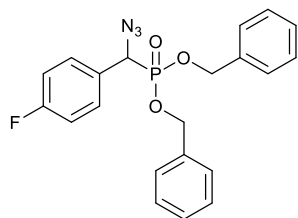

**11d (<sup>31</sup>P NMR)**

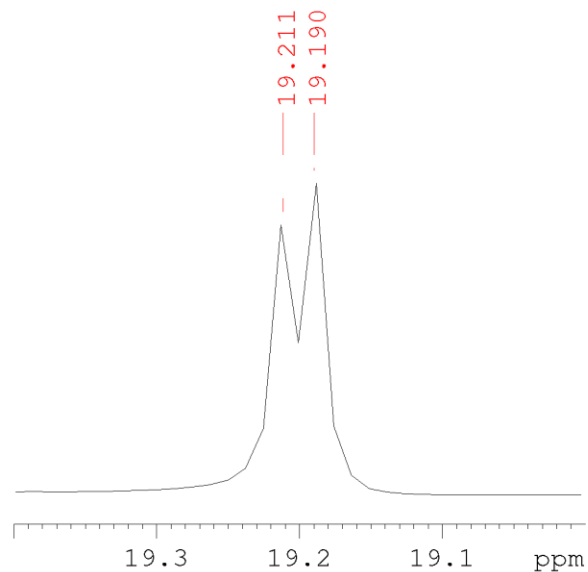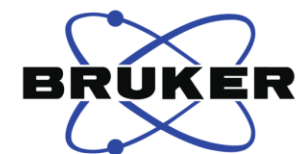

Current Data Parameters  
NAME CD84  
EXPNO 6  
PROCNO 1

F2 - Acquisition Parameters  
Date\_ 20190412  
Time 2.25 h  
INSTRUM CAB AV4 500 MHZ BASIC  
PROBHD Z150364\_0005 (   
PULPROG zgpg30  
TD 65536  
SOLVENT CDCl3  
NS 16  
DS 4  
SWH 81967.211 Hz  
FIDRES 2.501441 Hz  
AQ 0.3997696 sec  
RG 101  
DW 6.100 usec  
DE 18.00 usec  
TE 298.0 K  
D1 2.00000000 sec  
D11 0.03000000 sec  
TD0 1  
SFO1 202.2899643 MHz  
NUC1 31P  
P1 12.00 usec  
PLW1 45.76100159 W  
SFO2 499.7459990 MHz  
NUC2 1H  
CPDPRG[2] waltz16  
PCPD2 80.00 usec  
PLW2 15.53100014 W  
PLW12 0.34944999 W  
PLW13 0.17549001 W

F2 - Processing parameters  
SI 32768  
SF 202.3000793 MHz  
WDW EM  
SSB 0  
LB 1.00 Hz  
GB 0  
PC 1.40

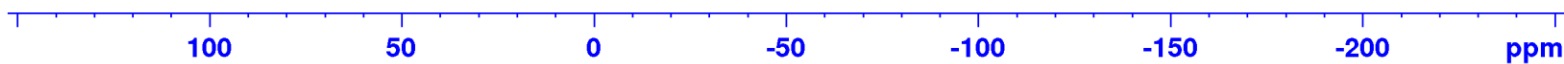

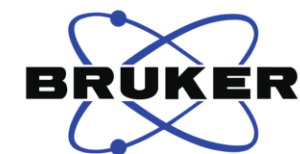

Current Data Parameters  
NAME CD84 19F  
EXPNO 1  
PROCNO 1

F2 - Acquisition Parameters  
Date\_ 20190412  
Time 11.30 h  
INSTRUM spect  
PROBHD Z108618\_0921 (   
PULPROG zgfhigqn.2  
TD 131072  
SOLVENT CDCl3  
NS 16  
DS 4  
SWH 89285.711 Hz  
FIDRES 1.362392 Hz  
AQ 0.7340032 sec  
RG 196.38  
DW 5.600 usec  
DE 120.00 usec  
TE 299.2 K  
D1 1.00000000 sec  
D11 0.03000000 sec  
D12 0.00002000 sec  
TD0 1  
SFO1 376.4889418 MHz  
NUC1 19F  
P1 15.00 usec  
PLW1 17.75399971 W  
SFO2 400.1616006 MHz  
NUC2 1H  
CPDPRG[2] waltz16  
PCPD2 90.00 usec  
PLW2 11.52400017 W  
PLW12 0.27886000 W

F2 - Processing parameters  
SI 65536  
SF 376.5265944 MHz  
WDW EM  
SSB 0  
LB 0.30 Hz  
GB 0  
PC 1.00

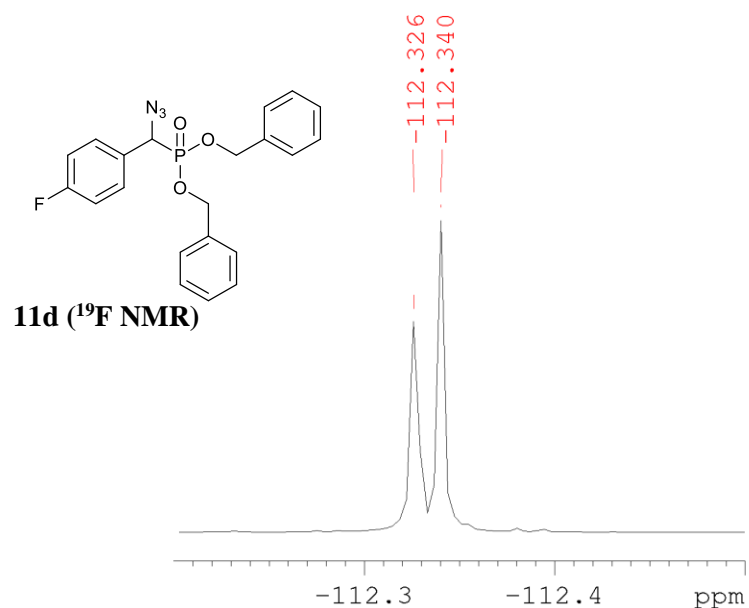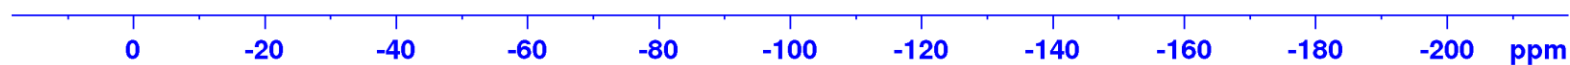

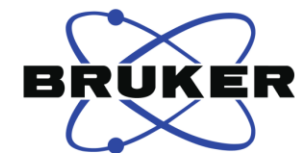

Current Data Parameters  
 NAME CD77  
 EXPNO 1  
 PROCNO 1

F2 - Acquisition Parameters  
 Date\_ 20180705  
 Time 15.54 h  
 INSTRUM spect  
 PROBHD Z108618\_0921 (   
 PULPROG zg30  
 TD 65536  
 SOLVENT CDC13  
 NS 16  
 DS 2  
 SWH 8012.820 Hz  
 FIDRES 0.244532 Hz  
 AQ 4.0894465 sec  
 RG 20.22  
 DW 62.400 usec  
 DE 6.50 usec  
 TE 298.7 K  
 D1 1.00000000 sec  
 TD0 1  
 SFO1 400.1624710 MHz  
 NUC1 1H  
 P1 14.00 usec  
 PLW1 11.52400017 W

F2 - Processing parameters  
 SI 65536  
 SF 400.1600168 MHz  
 WDW EM  
 SSB 0  
 LB 0.30 Hz  
 GB 0  
 PC 1.00

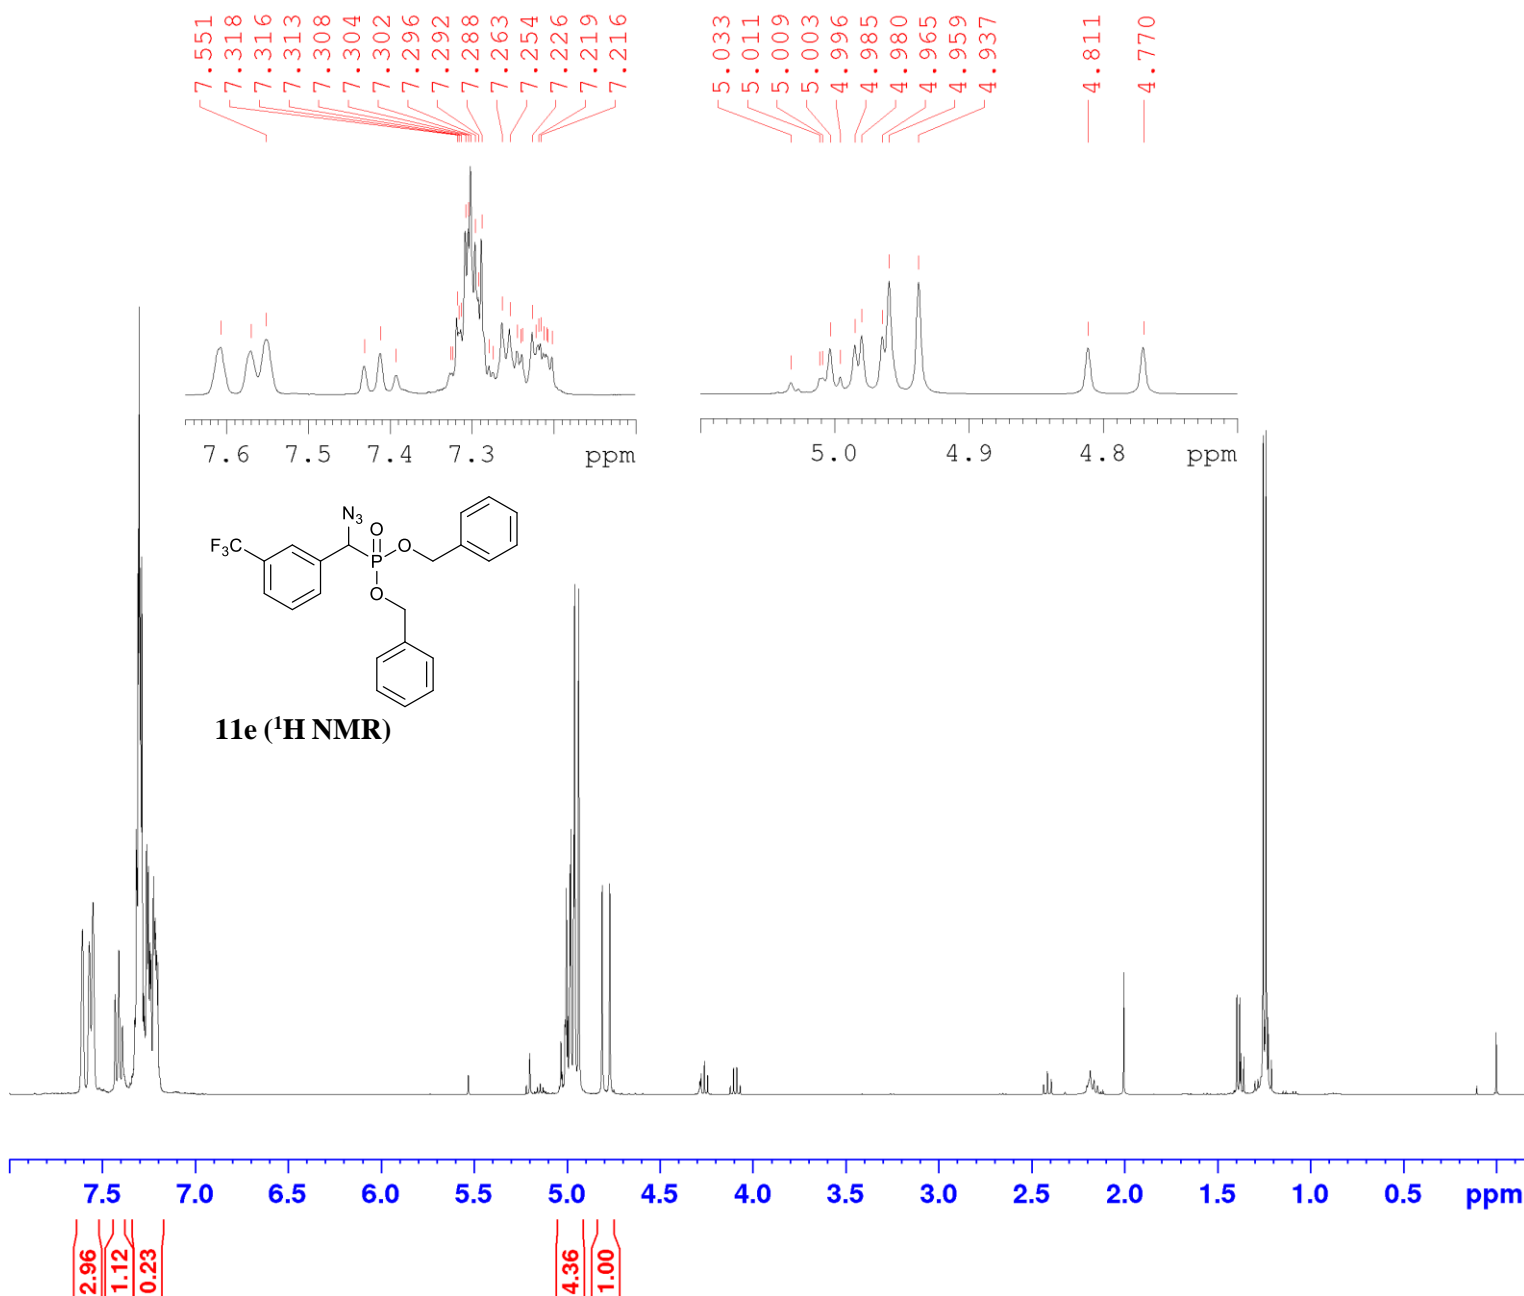

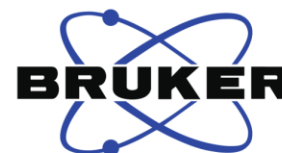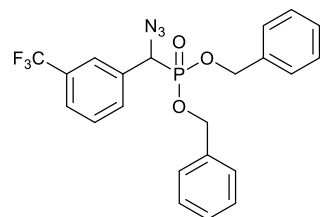

11e (<sup>13</sup>C NMR)

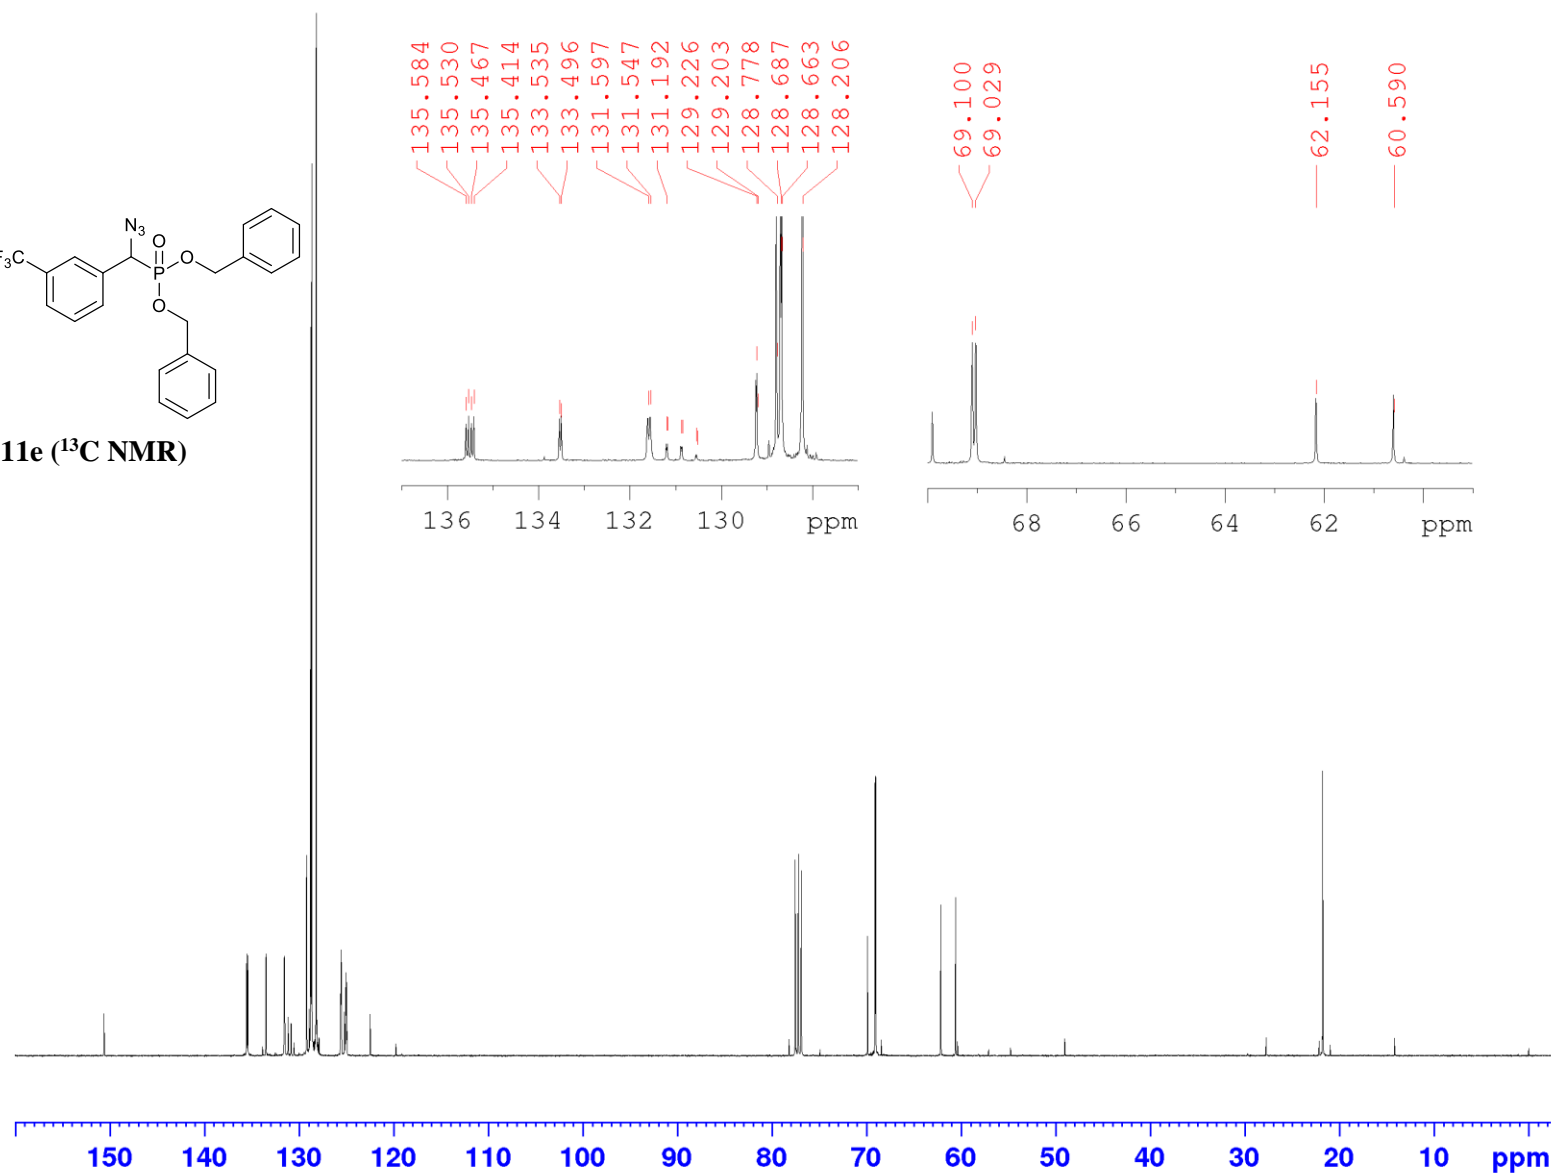

#### Current Data Parameters

NAME CD77  
EXPNO 2  
PROCNO 1

#### F2 - Acquisition Parameters

Date\_ 20180705  
Time 23.27 h  
INSTRUM spect  
PROBHD Z108618\_0921 (  
PULPROG zgpg30  
TD 65536  
SOLVENT CDCl3  
NS 2048  
DS 4  
SWH 24038.461 Hz  
FIDRES 0.733596 Hz  
AQ 1.3631488 sec  
RG 196.38  
DW 20.800 usec  
DE 6.50 usec  
TE 299.5 K  
D1 2.00000000 sec  
D11 0.03000000 sec  
TD0 1  
SFO1 100.6303741 MHz  
NUC1 13C  
P1 10.00 usec  
PLW1 55.50099945 W  
SFO2 400.1616006 MHz  
NUC2 1H  
CPDPRG[2] waltz16  
PCPD2 90.00 usec  
PLW2 11.52400017 W  
PLW12 0.27886000 W  
PLW13 0.14026000 W

#### F2 - Processing parameters

SI 32768  
SF 100.6203114 MHz  
WDW EM  
SSB 0  
LB 1.00 Hz  
GB 0  
PC 1.40

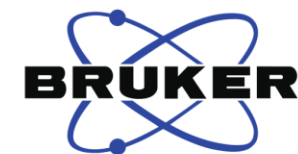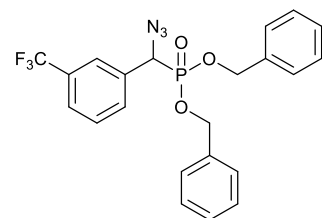

**11e (<sup>31</sup>P NMR)**

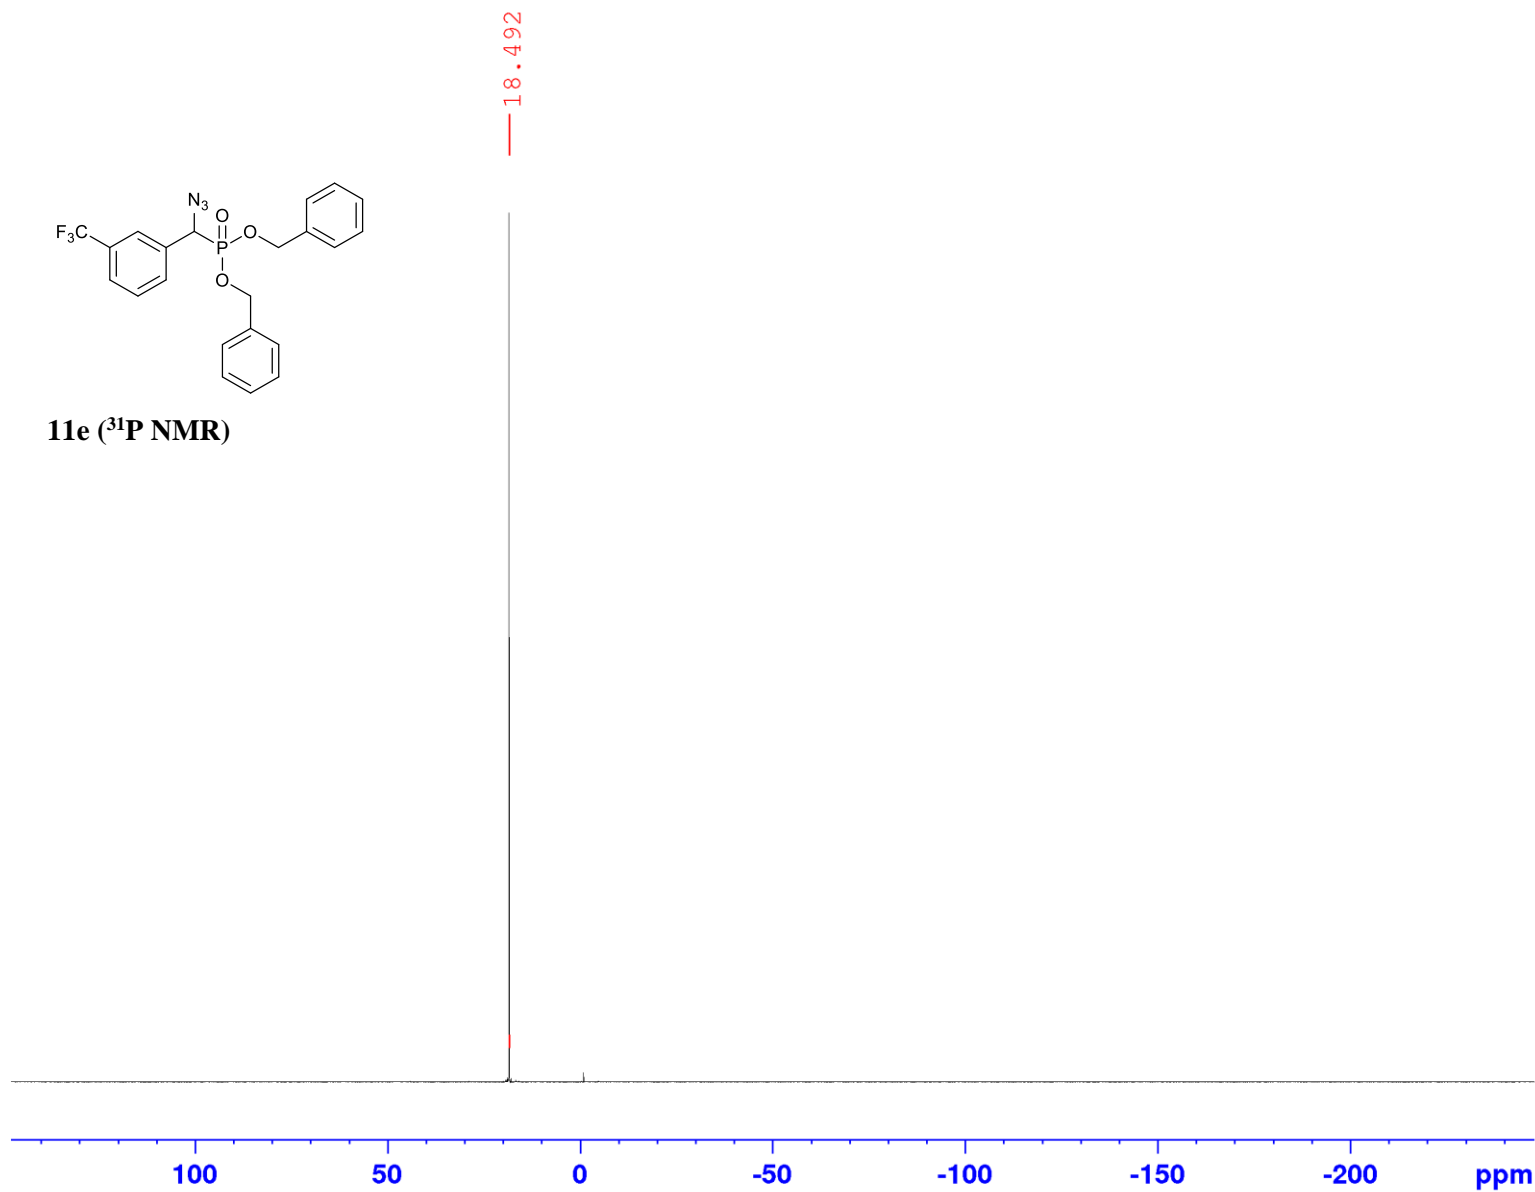

Current Data Parameters  
NAME CD77  
EXPNO 6  
PROCNO 1

F2 - Acquisition Parameters  
Date\_ 20180706  
Time 1.13 h  
INSTRUM spect  
PROBHD Z108618\_0921 (  
PULPROG zgpg30  
TD 65536  
SOLVENT CDC13  
NS 16  
DS 4  
SWH 64102.563 Hz  
FIDRES 1.956255 Hz  
AQ 0.5111808 sec  
RG 196.38  
DW 7.800 usec  
DE 6.50 usec  
TE 299.0 K  
D1 2.00000000 sec  
D11 0.03000000 sec  
TD0 1  
SFO1 161.9796378 MHz  
NUC1 31P  
P1 15.00 usec  
PLW1 11.77099991 W  
SFO2 400.1616006 MHz  
NUC2 1H  
CPDPRG[2] waltz16  
PCPD2 90.00 usec  
PLW2 11.52400017 W  
PLW12 0.27886000 W  
PLW13 0.14026000 W

F2 - Processing parameters  
SI 32768  
SF 161.9877372 MHz  
WDW EM  
SSB 0  
LB 1.00 Hz  
GB 0  
PC 1.40

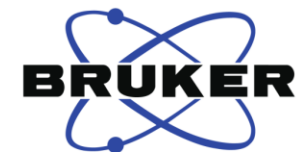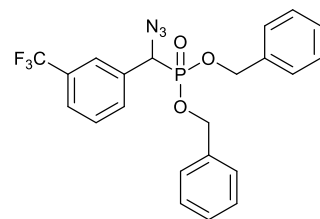

11e (<sup>19</sup>F NMR)

— -62.571

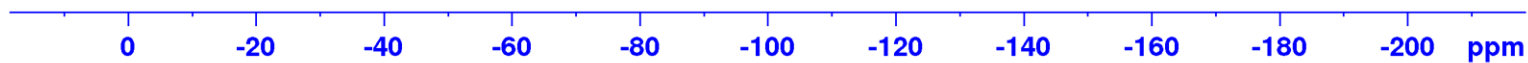

Current Data Parameters

NAME CD77  
EXPNO 7  
PROCNO 1

F2 - Acquisition Parameters

Date\_ 20180706  
Time 1.16 h  
INSTRUM spect  
PROBHD Z108618\_0921 (  
PULPROG zgfhigqn.2  
TD 131072  
SOLVENT CDCl3  
NS 16  
DS 4  
SWH 89285.711 Hz  
FIDRES 1.362392 Hz  
AQ 0.7340032 sec  
RG 196.38  
DW 5.600 usec  
DE 6.50 usec  
TE 298.8 K  
D1 1.00000000 sec  
D11 0.03000000 sec  
D12 0.00002000 sec  
TD0 1  
SFO1 376.4889418 MHz  
NUC1 19F  
P1 15.00 usec  
PLW1 17.75399971 W  
SFO2 400.1616006 MHz  
NUC2 1H  
CPDPRG[2] waltz16  
PCPD2 90.00 usec  
PLW2 11.52400017 W  
PLW12 0.27886000 W

F2 - Processing parameters

SI 65536  
SF 376.5265944 MHz  
WDW EM  
SSB 0  
LB 0.30 Hz  
GB 0  
PC 1.00

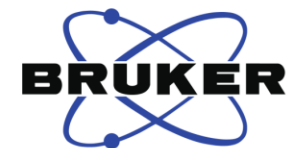

Current Data Parameters  
 NAME CD54 B3P39  
 EXPNO 1  
 PROCNO 1

F2 - Acquisition Parameters  
 Date\_ 20190730  
 Time 17.22 h  
 INSTRUM CAB AV4 500 MHZ BASIC  
 PROBHD Z150364\_0005 (zg30)  
 PULPROG 65536  
 TD 16  
 SOLVENT CDCl3  
 NS 2  
 DS 10000.000 Hz  
 SWH 0.305176 Hz  
 FIDRES 3.2767999 sec  
 AQ 50  
 RG 50.000 usec  
 DE 16.23 usec  
 TE 298.0 K  
 D1 1.00000000 sec  
 TD0 1  
 SFO1 499.7470859 MHz  
 NUC1 1H  
 P1 12.00 usec  
 PLW1 15.53100014 W

F2 - Processing parameters  
 SI 65536  
 SF 499.7440152 MHz  
 WDW EM  
 SSB 0  
 LB 0.30 Hz  
 GB 0  
 PC 1.00

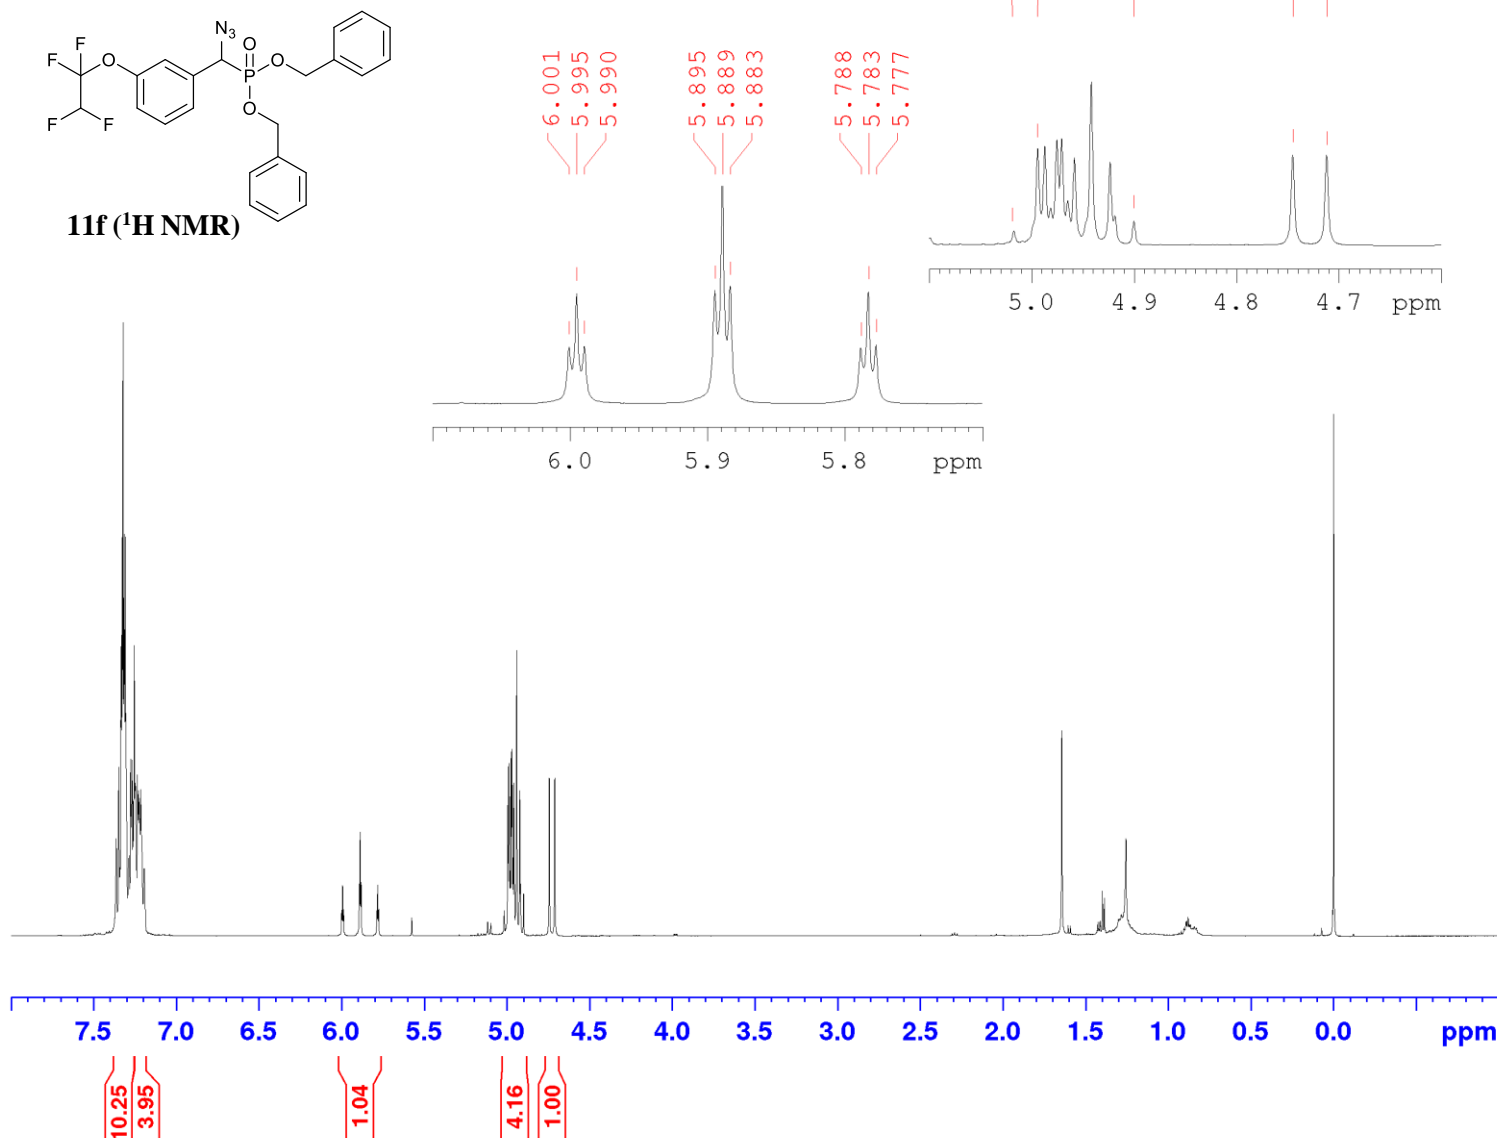

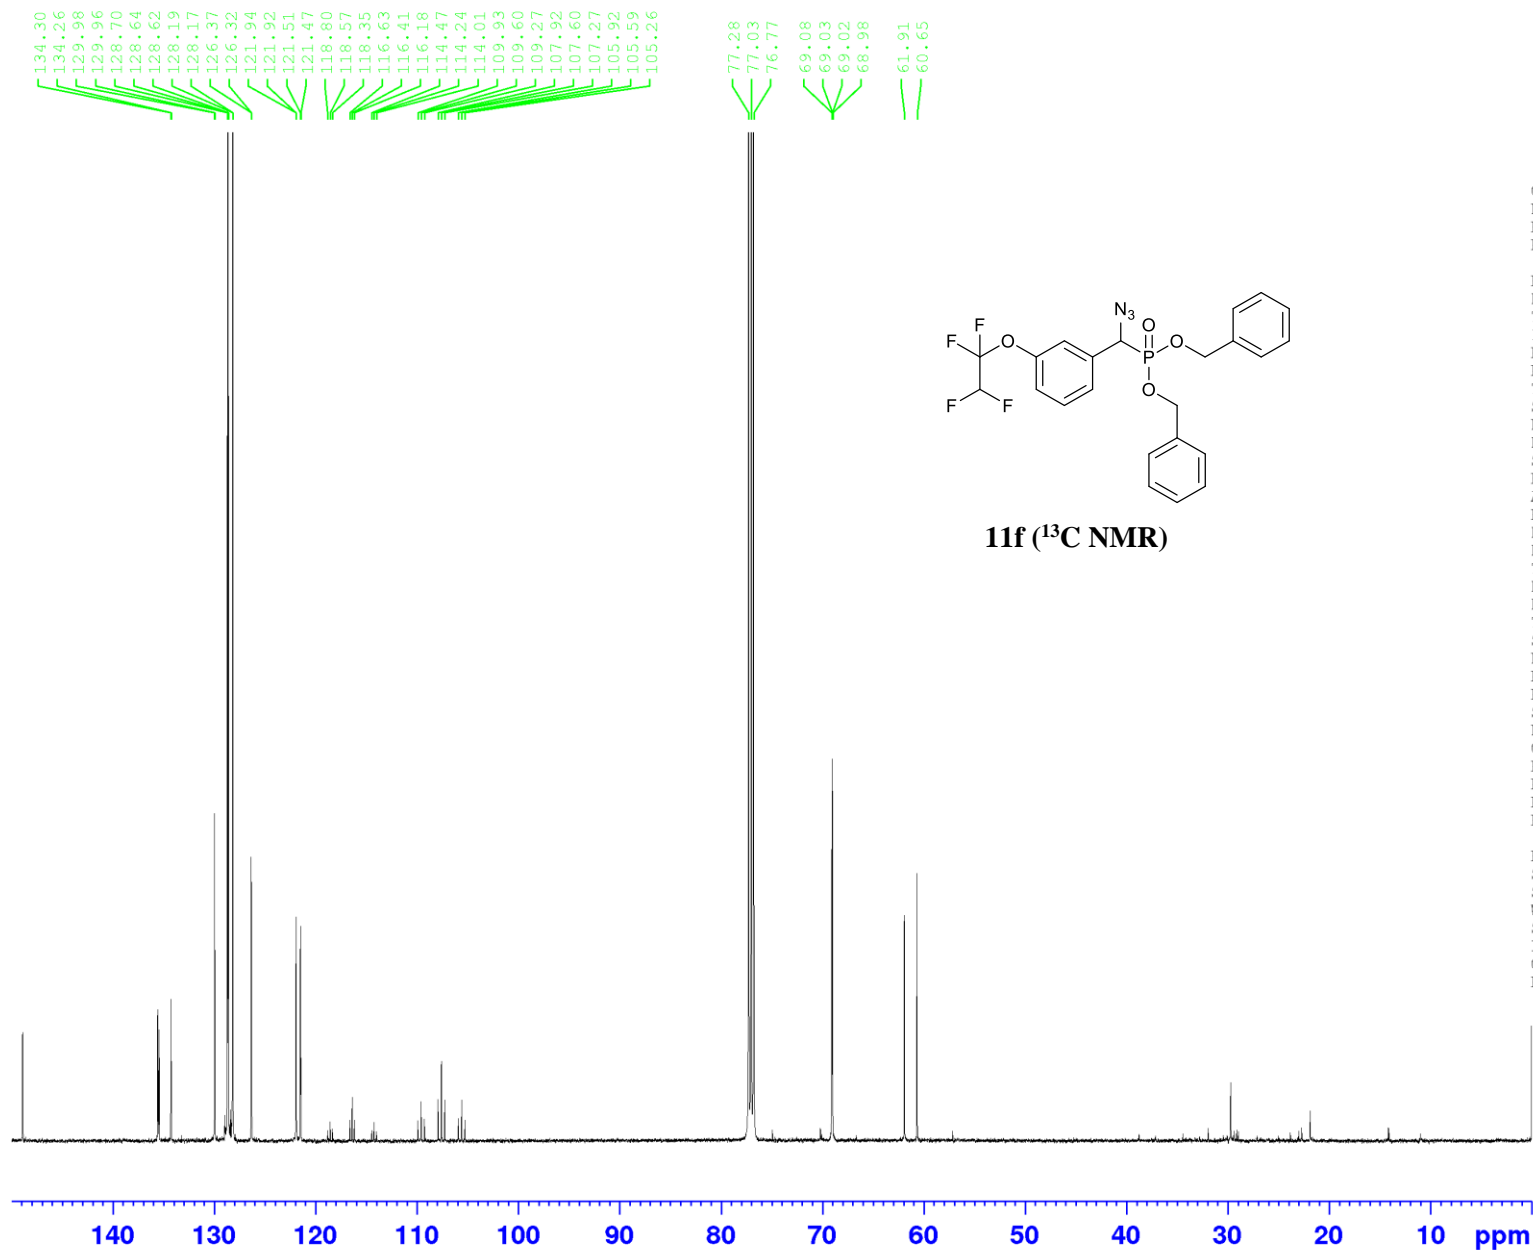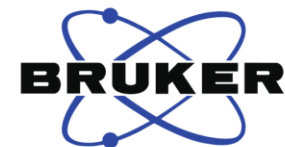

Current Data Parameters  
NAME CD54 B3P39  
EXPNO 2  
PROCNO 1

F2 - Acquisition Parameters  
Date\_ 20190731  
Time 3.46 h  
INSTRUM CAB AV4 500 MHZ BASIC  
PROBHD Z150364\_0005 (  
PULPROG zgpg30  
TD 65536  
SOLVENT CDCl3  
NS 2800  
DS 4  
SWH 30120.482 Hz  
FIDRES 0.919204 Hz  
AQ 1.0878977 sec  
RG 101  
DW 16.600 usec  
DE 18.00 usec  
TE 298.0 K  
D1 2.00000000 sec  
D11 0.03000000 sec  
TD0 1  
SFO1 125.6732948 MHz  
NUC1 13C  
P1 10.00 usec  
PLW1 51.23600006 W  
SFO2 499.7459990 MHz  
NUC2 1H  
CPDPRG2 waltz16  
PCPD2 80.00 usec  
PLW2 15.53100014 W  
PLW12 0.34944999 W  
PLW13 0.17549001 W

F2 - Processing parameters  
SI 32768  
SF 125.6607302 MHz  
WDW EM  
SSB 0  
LB 1.00 Hz  
GB 0  
PC 1.40

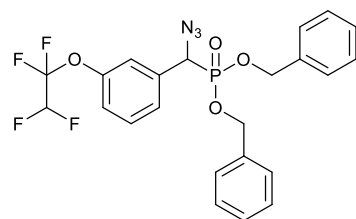

**11f (<sup>31</sup>P NMR)**

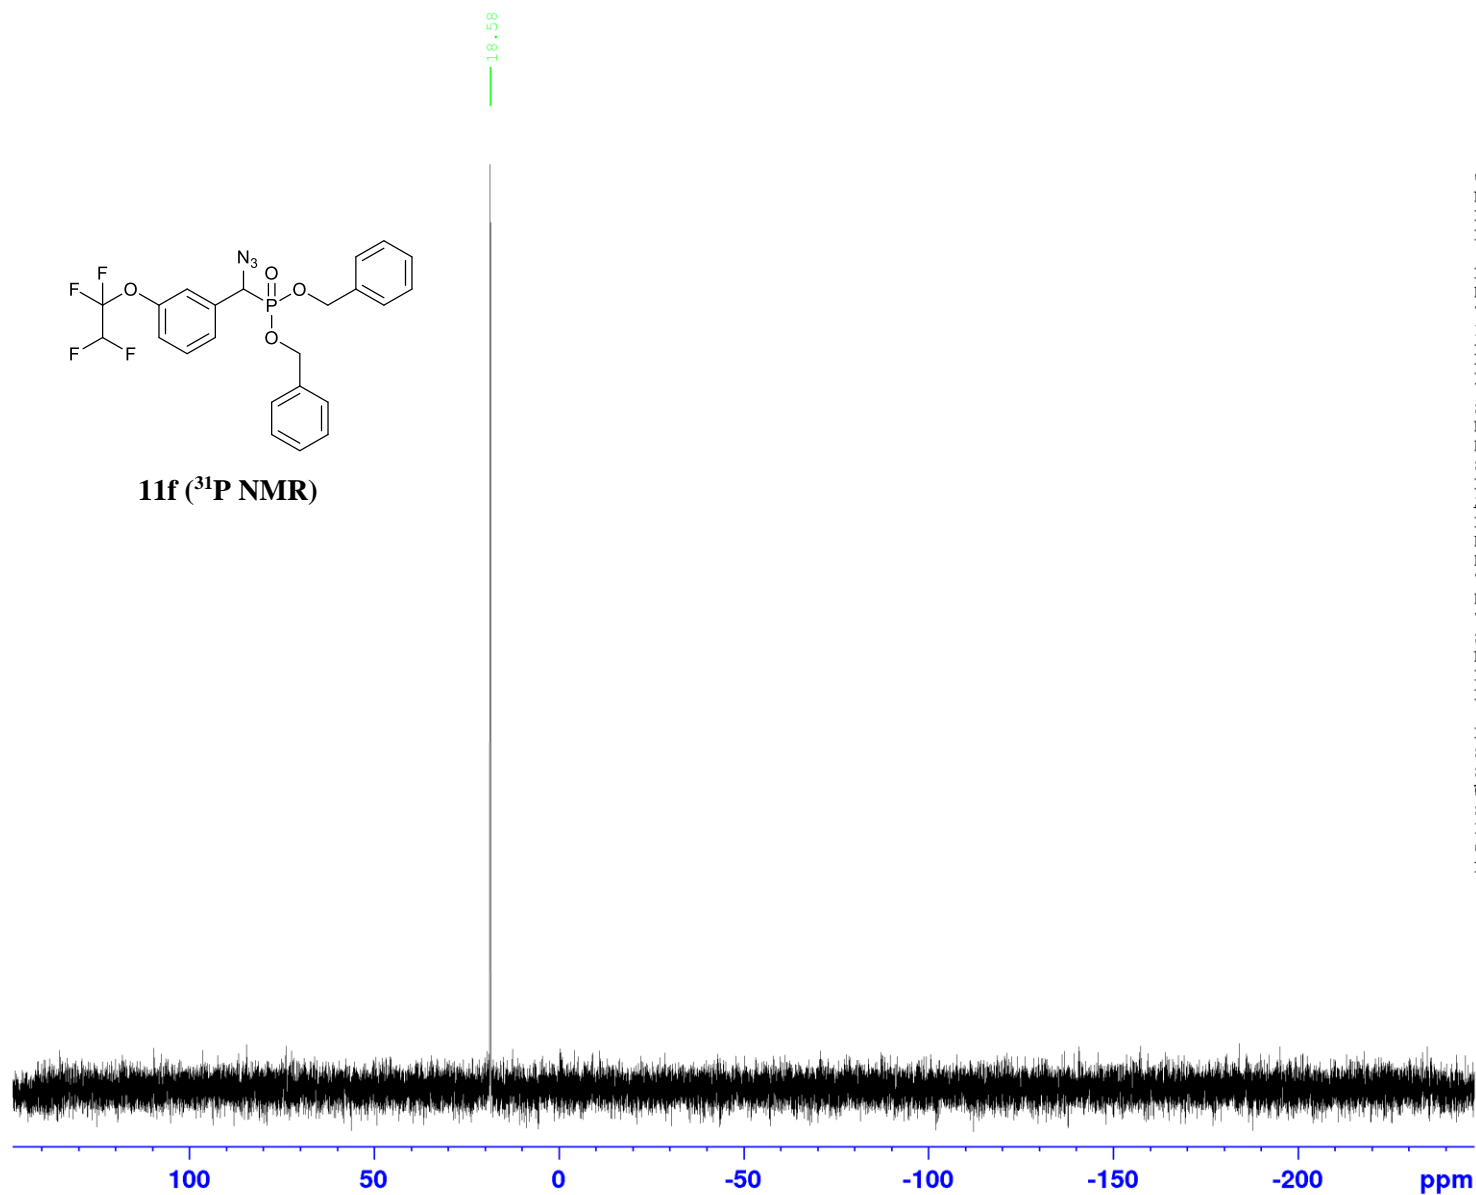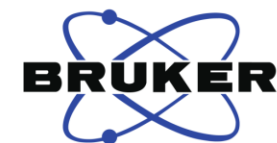

Current Data Parameters  
 NAME CD54 B3P39 P+F  
 EXPNO 2  
 PROCNO 1

F2 - Acquisition Parameters  
 Date\_ 20190801  
 Time 10.03 h  
 INSTRUM spect  
 PROBHD Z108618\_0921 (  
 PULPROG zg30  
 TD 65536  
 SOLVENT CDCl3  
 NS 4  
 DS 0  
 SWH 64102.563 Hz  
 FIDRES 1.956255 Hz  
 AQ 0.5111808 sec  
 RG 196.38  
 DW 7.800 usec  
 DE 50.00 usec  
 TE 298.8 K  
 D1 2.00000000 sec  
 TD0 1  
 SFO1 161.9796378 MHz  
 NUC1 31P  
 P1 15.00 usec  
 PLW1 11.77099991 W

F2 - Processing parameters  
 SI 32768  
 SF 161.9877372 MHz  
 WDW EM  
 SSB 0  
 LB 1.00 Hz  
 GB 0  
 PC 1.40

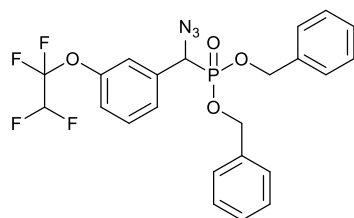

**11f ( $^{19}\text{F}$  NMR)**

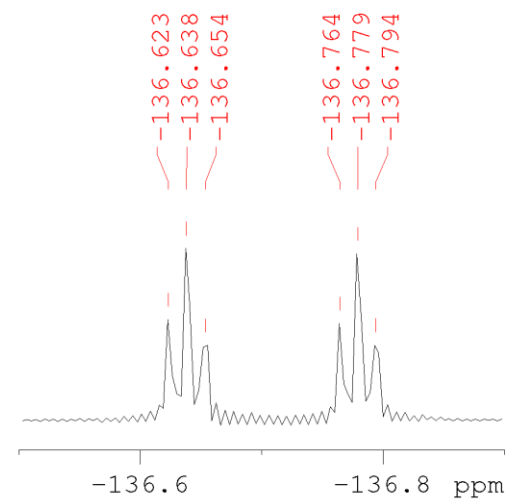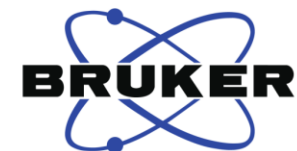

Current Data Parameters  
 NAME CD54 B3P39 P+F  
 EXPNO 1  
 PROCNO 1

F2 - Acquisition Parameters  
 Date\_ 20190801  
 Time 10.02 h  
 INSTRUM spect  
 PROBHD Z108618\_0921 (  
 PULPROG zgfglgn  
 TD 65536  
 SOLVENT CDCl3  
 NS 4  
 DS 0  
 SWH 89285.711 Hz  
 FIDRES 2.724784 Hz  
 AQ 0.3670016 sec  
 RG 196.38  
 DW 5.600 usec  
 DE 120.00 usec  
 TE 298.8 K  
 D1 1.00000000 sec  
 TD0 1  
 SFO1 376.4889413 MHz  
 NUC1  $^{19}\text{F}$   
 P1 15.00 usec  
 PLW1 17.75399971 W

F2 - Processing parameters  
 SI 65536  
 SF 376.5265940 MHz  
 WDW EM  
 SSB 0  
 LB 0.30 Hz  
 GB 0  
 PC 1.00

0 -20 -40 -60 -80 -100 -120 -140 -160 -180 -200 ppm

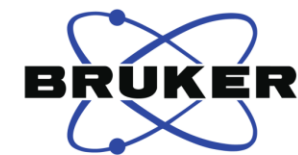

Current Data Parameters  
 NAME CD78  
 EXPNO 1  
 PROCNO 1

F2 - Acquisition Parameters  
 Date\_ 20190321  
 Time 12.48 h  
 INSTRUM CAB AV4 500 MHZ BASIC  
 PROBHD Z150364\_0005 (zg30)  
 TD 65536  
 SOLVENT CDCl3  
 NS 16  
 DS 2  
 SWH 10000.000 Hz  
 FIDRES 0.305176 Hz  
 AQ 3.2767999 sec  
 RG 32  
 DW 50.000 usec  
 DE 16.23 usec  
 TE 298.0 K  
 D1 1.00000000 sec  
 TD0 1  
 SFO1 499.7470859 MHz  
 NUC1 1H  
 P1 12.00 usec  
 PLW1 15.53100014 W

F2 - Processing parameters  
 SI 65536  
 SF 499.7440226 MHz  
 WDW EM  
 SSB 0  
 LB 0.30 Hz  
 GB 0  
 PC 1.00

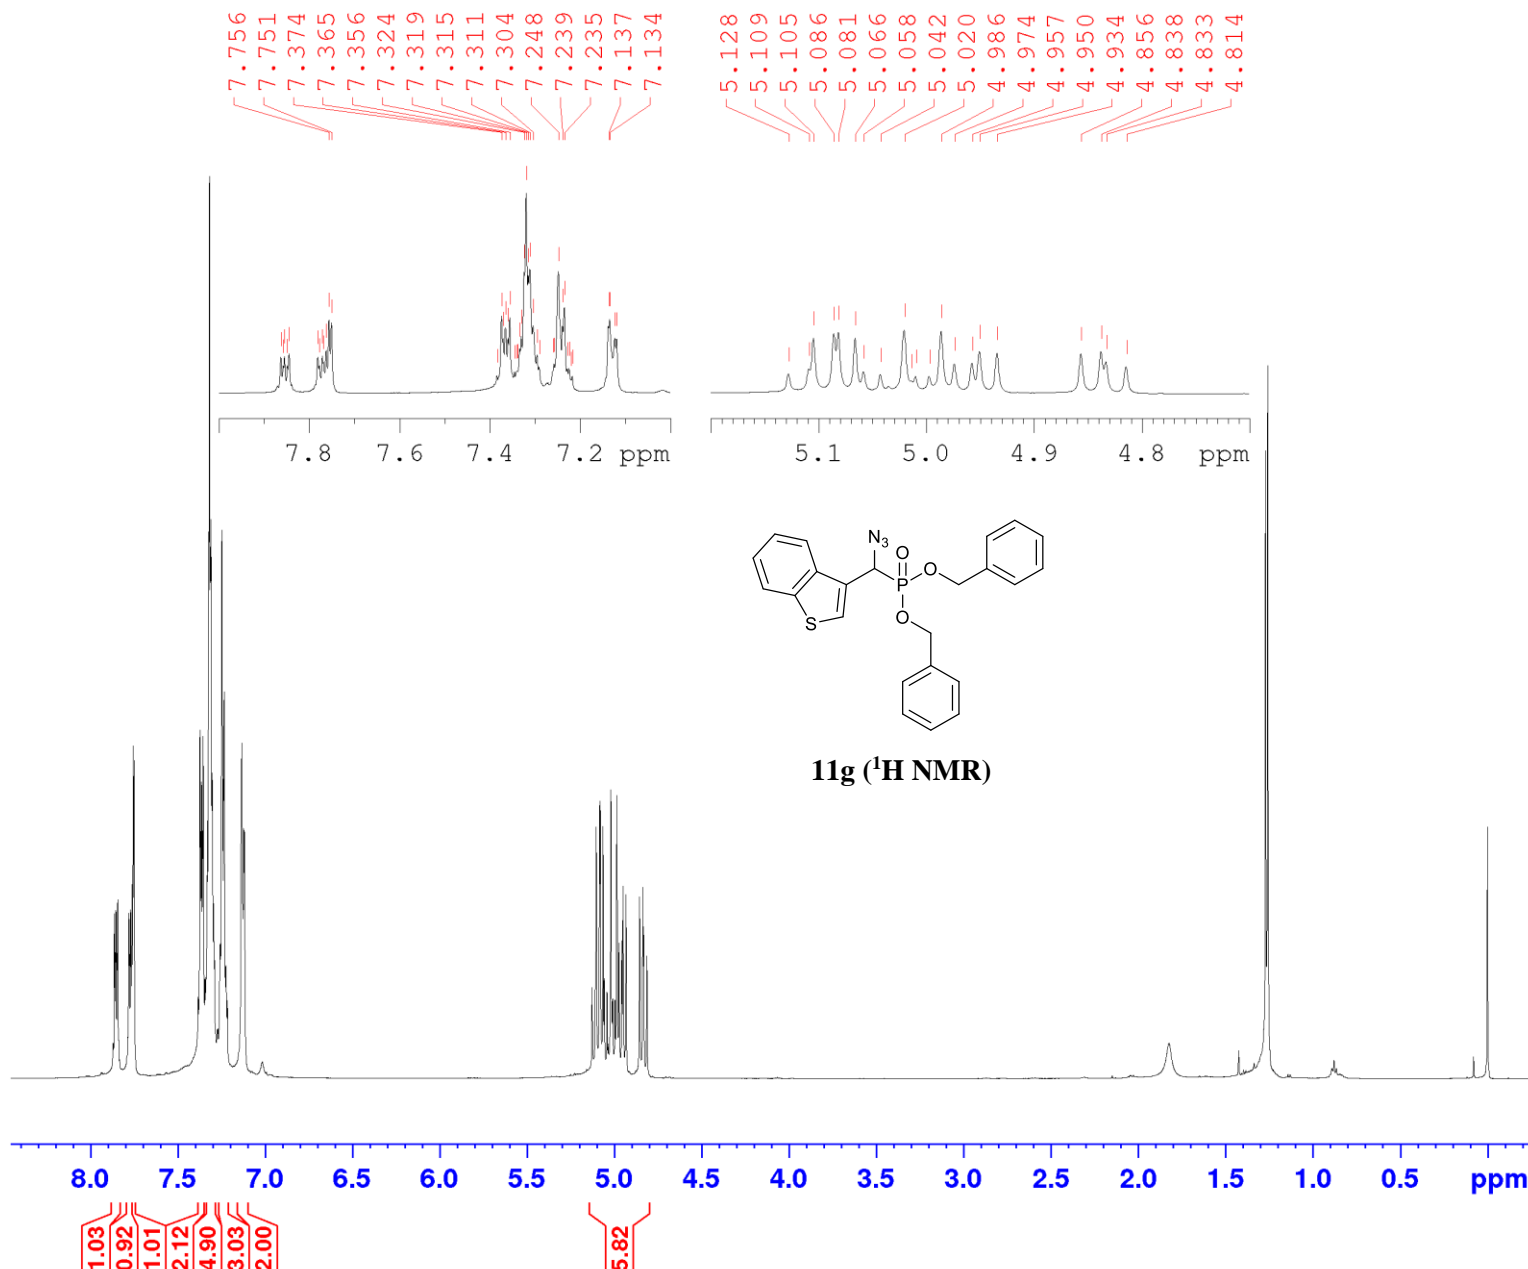

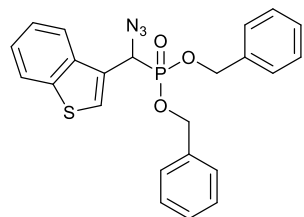

11g ( $^{13}\text{C}$  NMR)

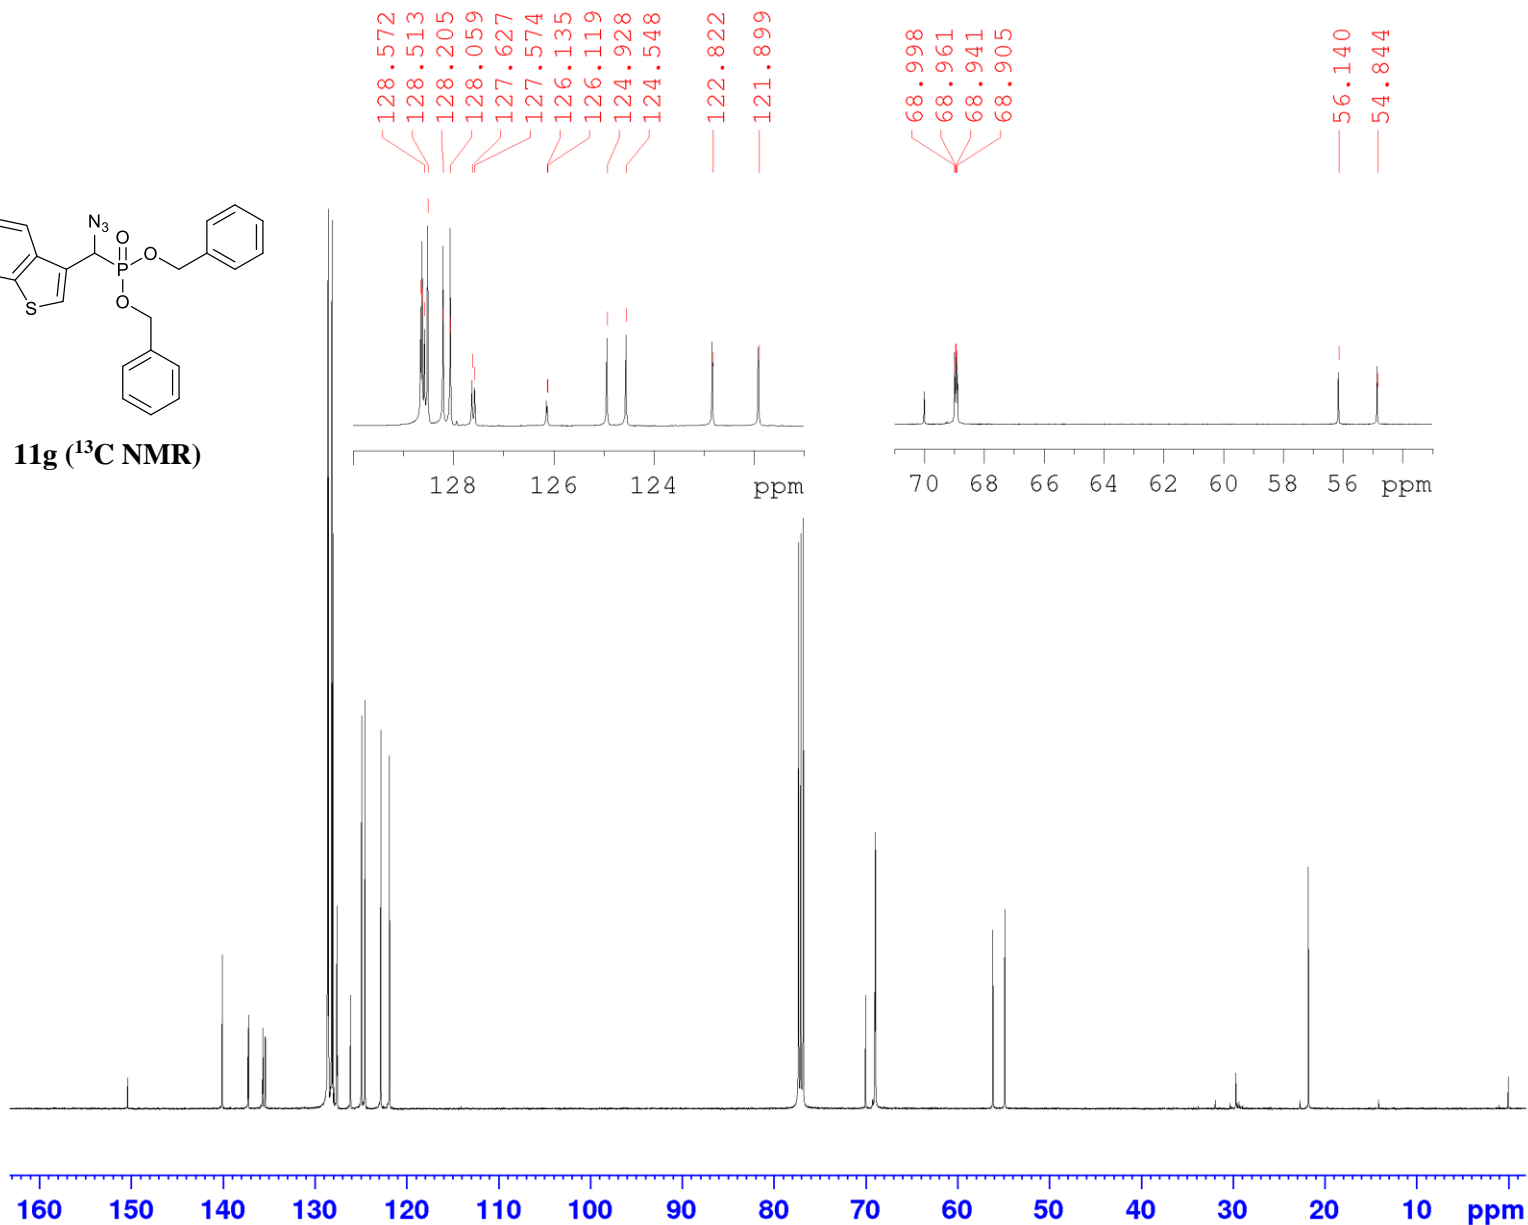

Current Data Parameters  
 NAME CD78  
 EXPNO 2  
 PROCNO 1

F2 - Acquisition Parameters  
 Date\_ 20190321  
 Time 19.53 h  
 INSTRUM CAB AV4 500 MHZ BASIC  
 PROBHD Z150364\_0005 (   
 PULPROG zgpg30  
 TD 65536  
 SOLVENT CDCl3  
 NS 2048  
 DS 4  
 SWH 30120.482 Hz  
 FIDRES 0.919204 Hz  
 AQ 1.0878977 sec  
 RG 101  
 DW 16.600 usec  
 DE 18.00 usec  
 TE 298.0 K  
 D1 2.00000000 sec  
 D11 0.03000000 sec  
 TD0 1  
 SFO1 125.6732948 MHz  
 NUC1 13C  
 P1 10.00 usec  
 PLW1 51.23600006 W  
 SFO2 499.7459990 MHz  
 NUC2 1H  
 CPDPRG[2] waltz16  
 PCPD2 80.00 usec  
 PLW2 15.53100014 W  
 PLW12 0.34944999 W  
 PLW13 0.17549001 W

F2 - Processing parameters  
 SI 32768  
 SF 125.6607349 MHz  
 WDW EM  
 SSB 0  
 LB 1.00 Hz  
 GB 0  
 PC 1.40

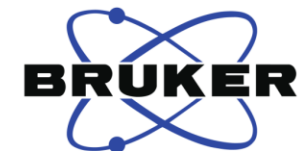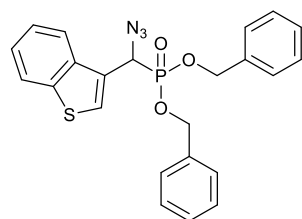

**11g ( $^{31}\text{P}$  NMR)**

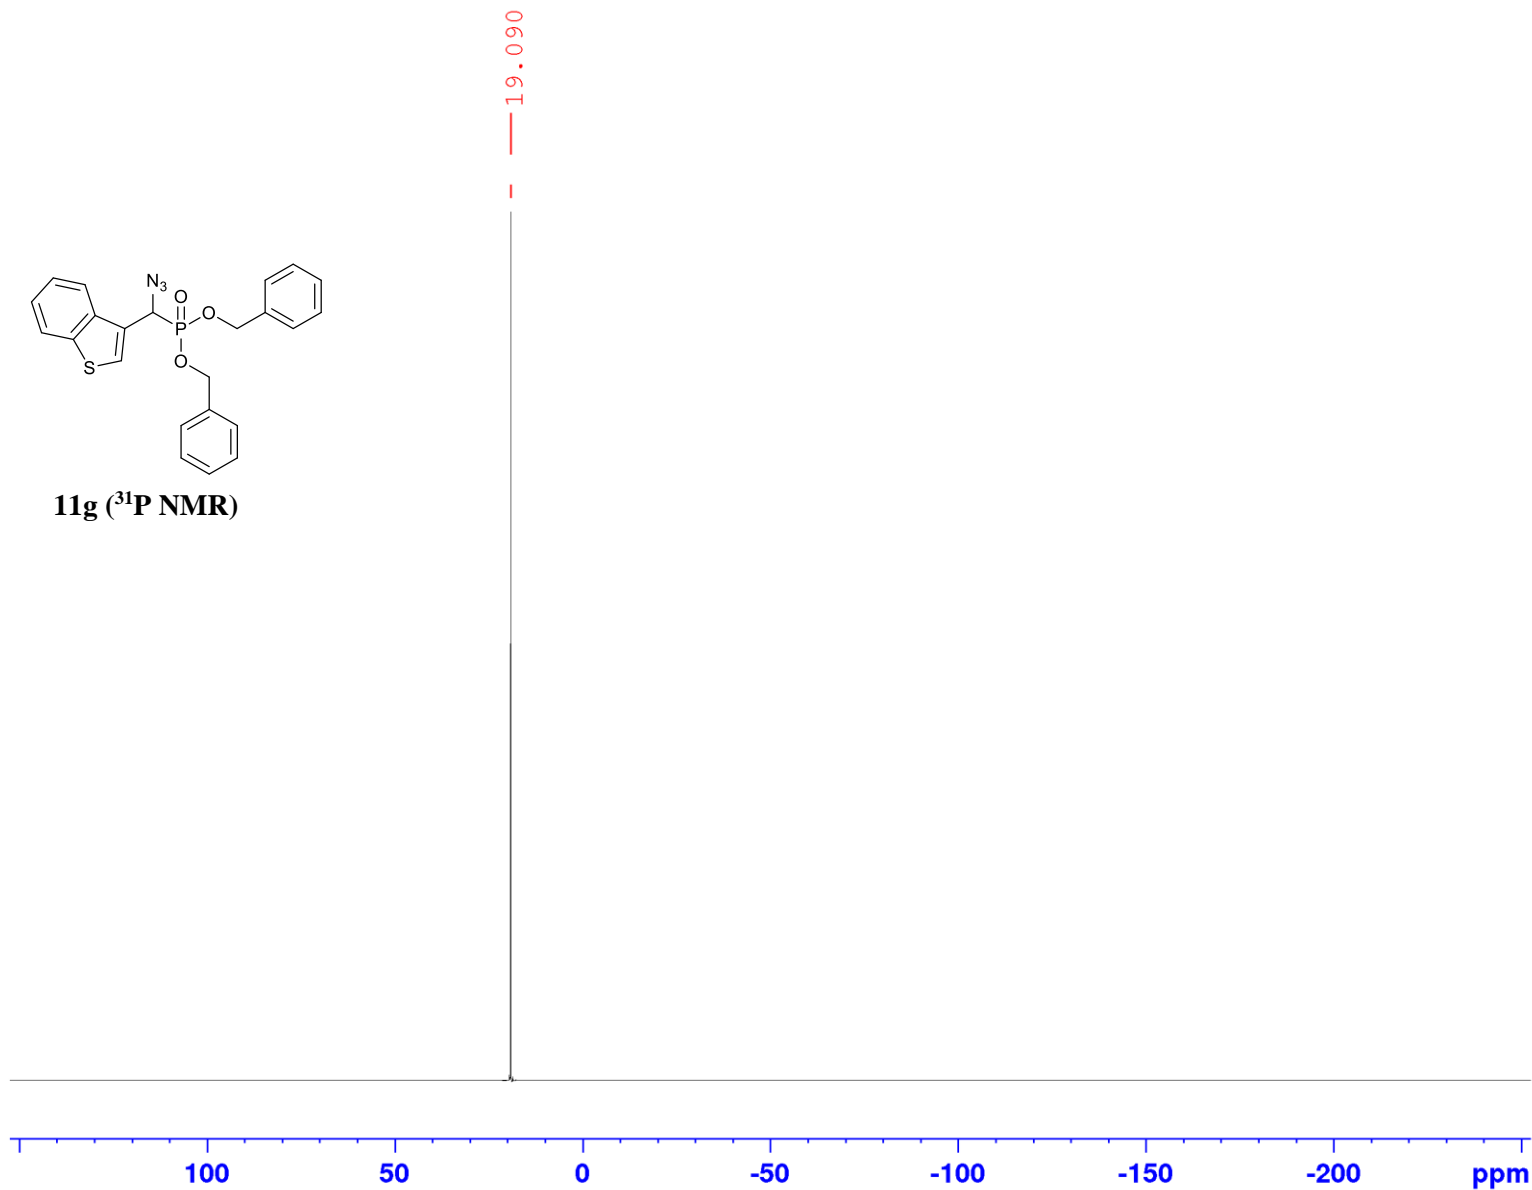

Current Data Parameters  
NAME CD78  
EXPNO 6  
PROCNO 1

F2 - Acquisition Parameters  
Date\_ 20180711  
Time 0.42 h  
INSTRUM CAB AV4 500 MHZ BASIC  
PROBHD Z150364\_0005 (  
PULPROG zgpg30  
TD 65536  
SOLVENT CDCl3  
NS 16  
DS 4  
SWH 81967.211 Hz  
FIDRES 2.501441 Hz  
AQ 0.3997696 sec  
RG 101  
DW 6.100 usec  
DE 18.00 usec  
TE 298.0 K  
D1 2.00000000 sec  
D11 0.03000000 sec  
TD0 1  
SFO1 202.2899643 MHz  
NUC1  $^{31}\text{P}$   
P1 12.00 usec  
PLW1 45.76100159 W  
SFO2 499.7459990 MHz  
NUC2  $^1\text{H}$   
CPDPRG[2] waltz16  
PCPD2 80.00 usec  
PLW2 15.53100014 W  
PLW12 0.34306911 W  
PLW13 0.17194620 W

F2 - Processing parameters  
SI 32768  
SF 202.3000793 MHz  
WDW EM  
SSB 0  
LB 1.00 Hz  
GB 0  
PC 1.40

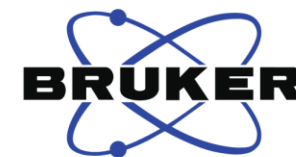

# Current Data Parameters

NAME CD107s  
EXPNO 1  
PROCNO 1

## F2 - Acquisition Parameters

Date\_ 20191213  
Time 15.52 h  
INSTRUM spect  
PROBHD z108618\_0921 (  
PULPROG zg30  
TD 65536  
SOLVENT D2O  
NS 28  
DS 2  
SWH 8012.820 Hz  
FIDRES 0.244532 Hz  
AQ 4.0894465 sec  
RG 196.38  
DW 62.400 usec  
DE 6.50 usec  
TE 299.2 K  
D1 1.00000000 sec  
TD0 1  
SFO1 400.1624710 MHz  
NUC1 1H  
P1 14.00 usec  
PLW1 11.52400017 W

## F2 - Processing parameters

SI 65536  
SF 400.1600000 MHz  
WDW EM  
SSB 0  
LB 0.30 Hz  
GB 0  
PC 1.00

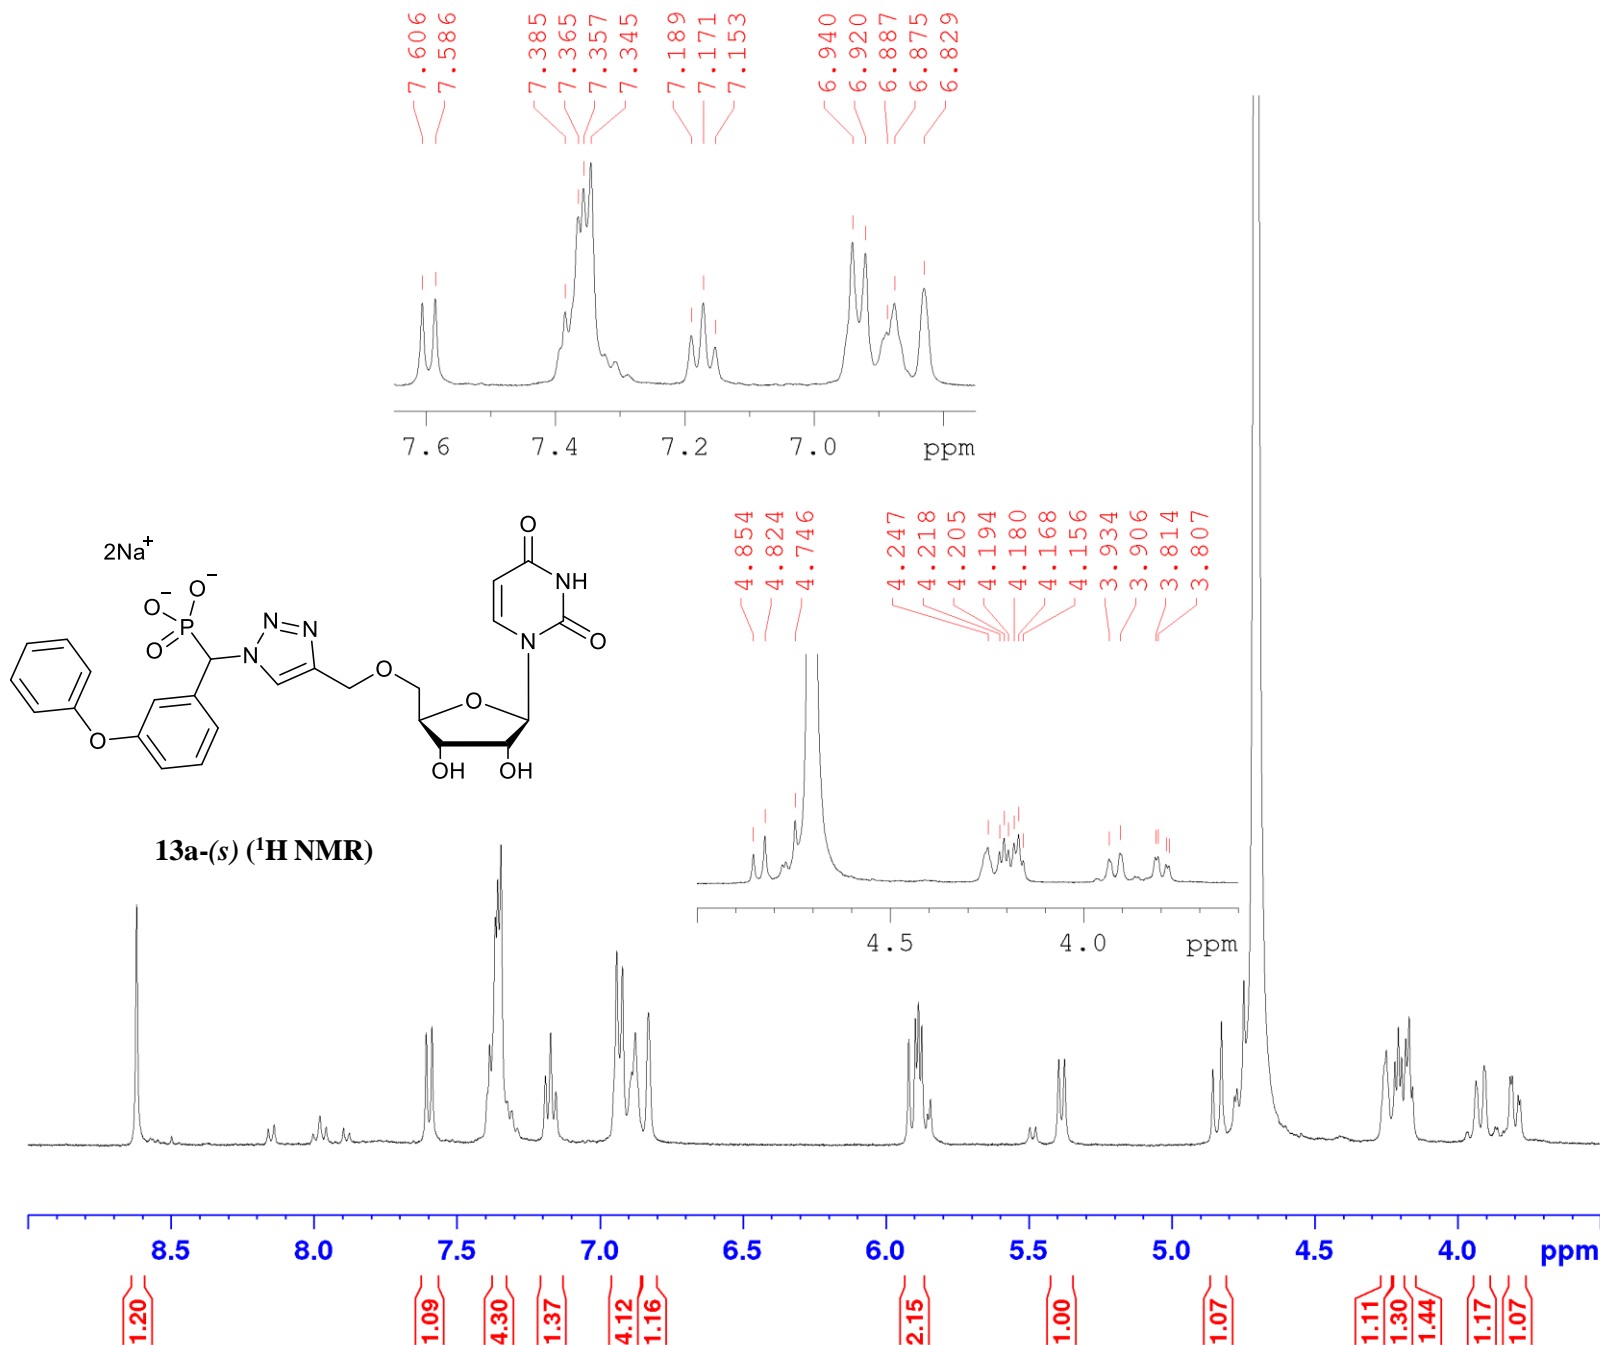

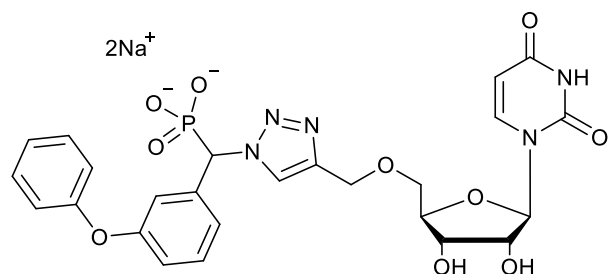

**13a-(s) (<sup>13</sup>C NMR)**

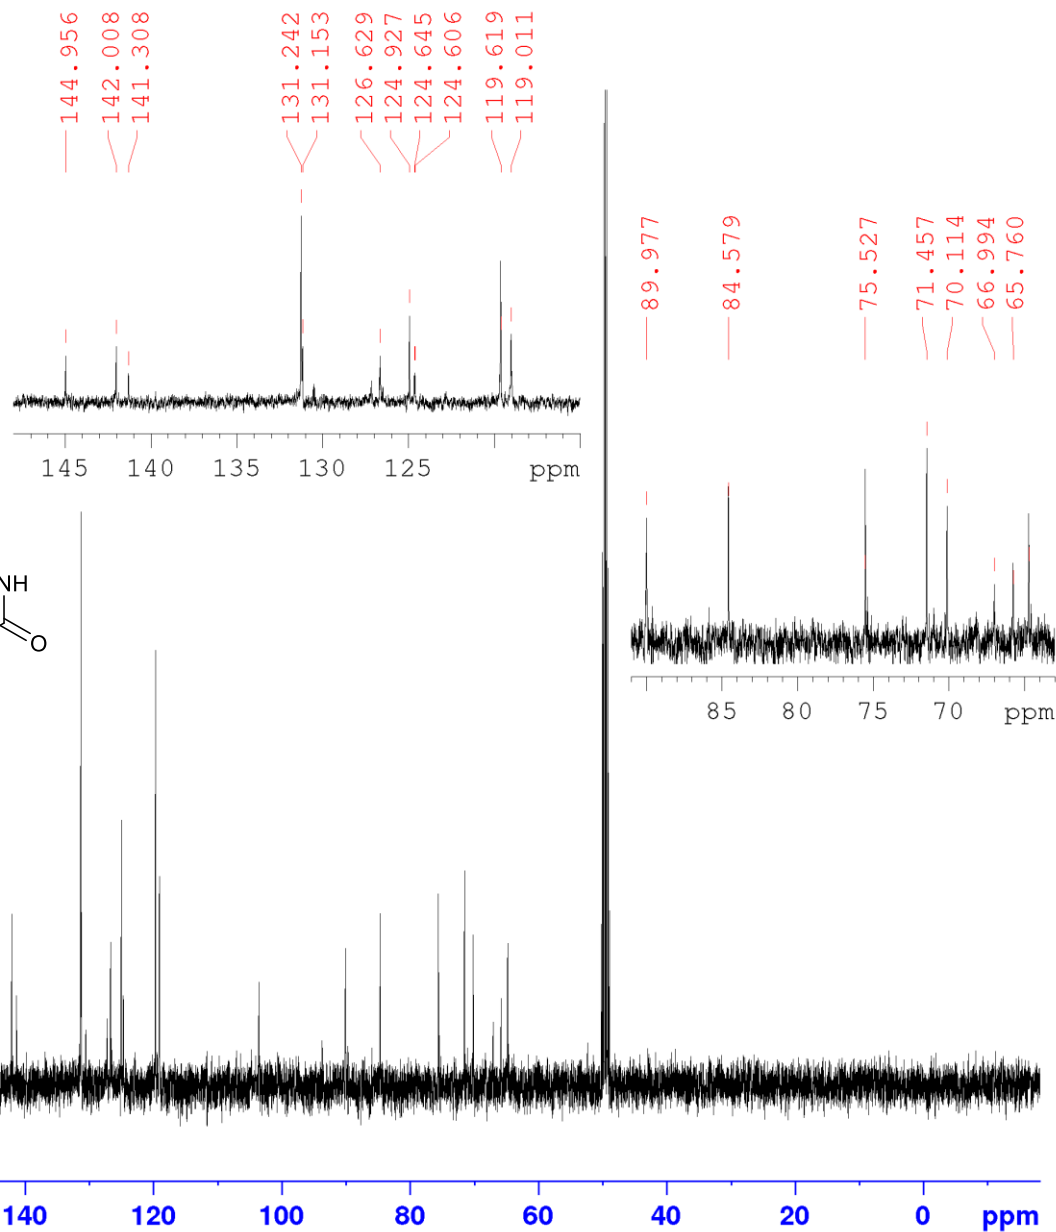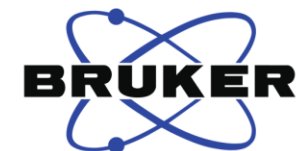

Current Data Parameters  
NAME CD107s  
EXPNO 3  
PROCNO 1

F2 - Acquisition Parameters  
Date\_ 20191214  
Time 2.34 h  
INSTRUM spect  
PROBHD z108618\_0921 (  
PULPROG zgpg30  
TD 65536  
SOLVENT D2O  
NS 3650  
DS 4  
SWH 24038.461 Hz  
FIDRES 0.733596 Hz  
AQ 1.3631488 sec  
RG 196.38  
DW 20.800 usec  
DE 6.50 usec  
TE 299.1 K  
D1 2.00000000 sec  
D11 0.03000000 sec  
TD0 1  
SFO1 100.6303741 MHz  
NUC1 13C  
P1 10.00 usec  
PLW1 55.50099945 W  
SFO2 400.1616006 MHz  
NUC2 1H  
CPDPRG[2] waltz16  
PCPD2 90.00 usec  
PLW2 11.52400017 W  
PLW12 0.27886000 W  
PLW13 0.14026000 W

F2 - Processing parameters  
SI 32768  
SF 100.6201957 MHz  
WDW EM  
SSB 0  
LB 1.00 Hz  
GB 0  
PC 1.40

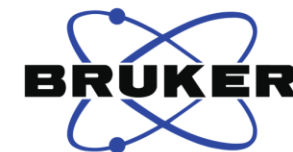

Current Data Parameters  
NAME CD107s  
EXPNO 5  
PROCNO 1

F2 - Acquisition Parameters  
Date\_ 20191214  
Time 3.07 h  
INSTRUM spect  
PROBHD Z108618\_0921 (  
PULPROG zg30  
TD 65536  
SOLVENT D2O  
NS 4  
DS 0  
SWH 64102.563 Hz  
FIDRES 1.956255 Hz  
AQ 0.5111808 sec  
RG 196.38  
DW 7.800 usec  
DE 50.00 usec  
TE 299.2 K  
D1 2.00000000 sec  
TD0 1  
SFO1 161.9796378 MHz  
NUC1 31P  
P1 15.00 usec  
PLW1 11.77099991 W

F2 - Processing parameters  
SI 32768  
SF 161.9877372 MHz  
WDW EM  
SSB 0  
LB 1.00 Hz  
GB 0  
PC 1.40

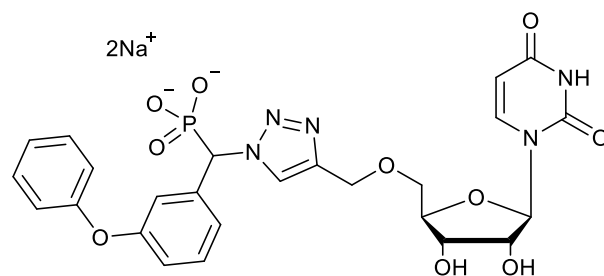

13a-(s) (<sup>31</sup>P NMR)

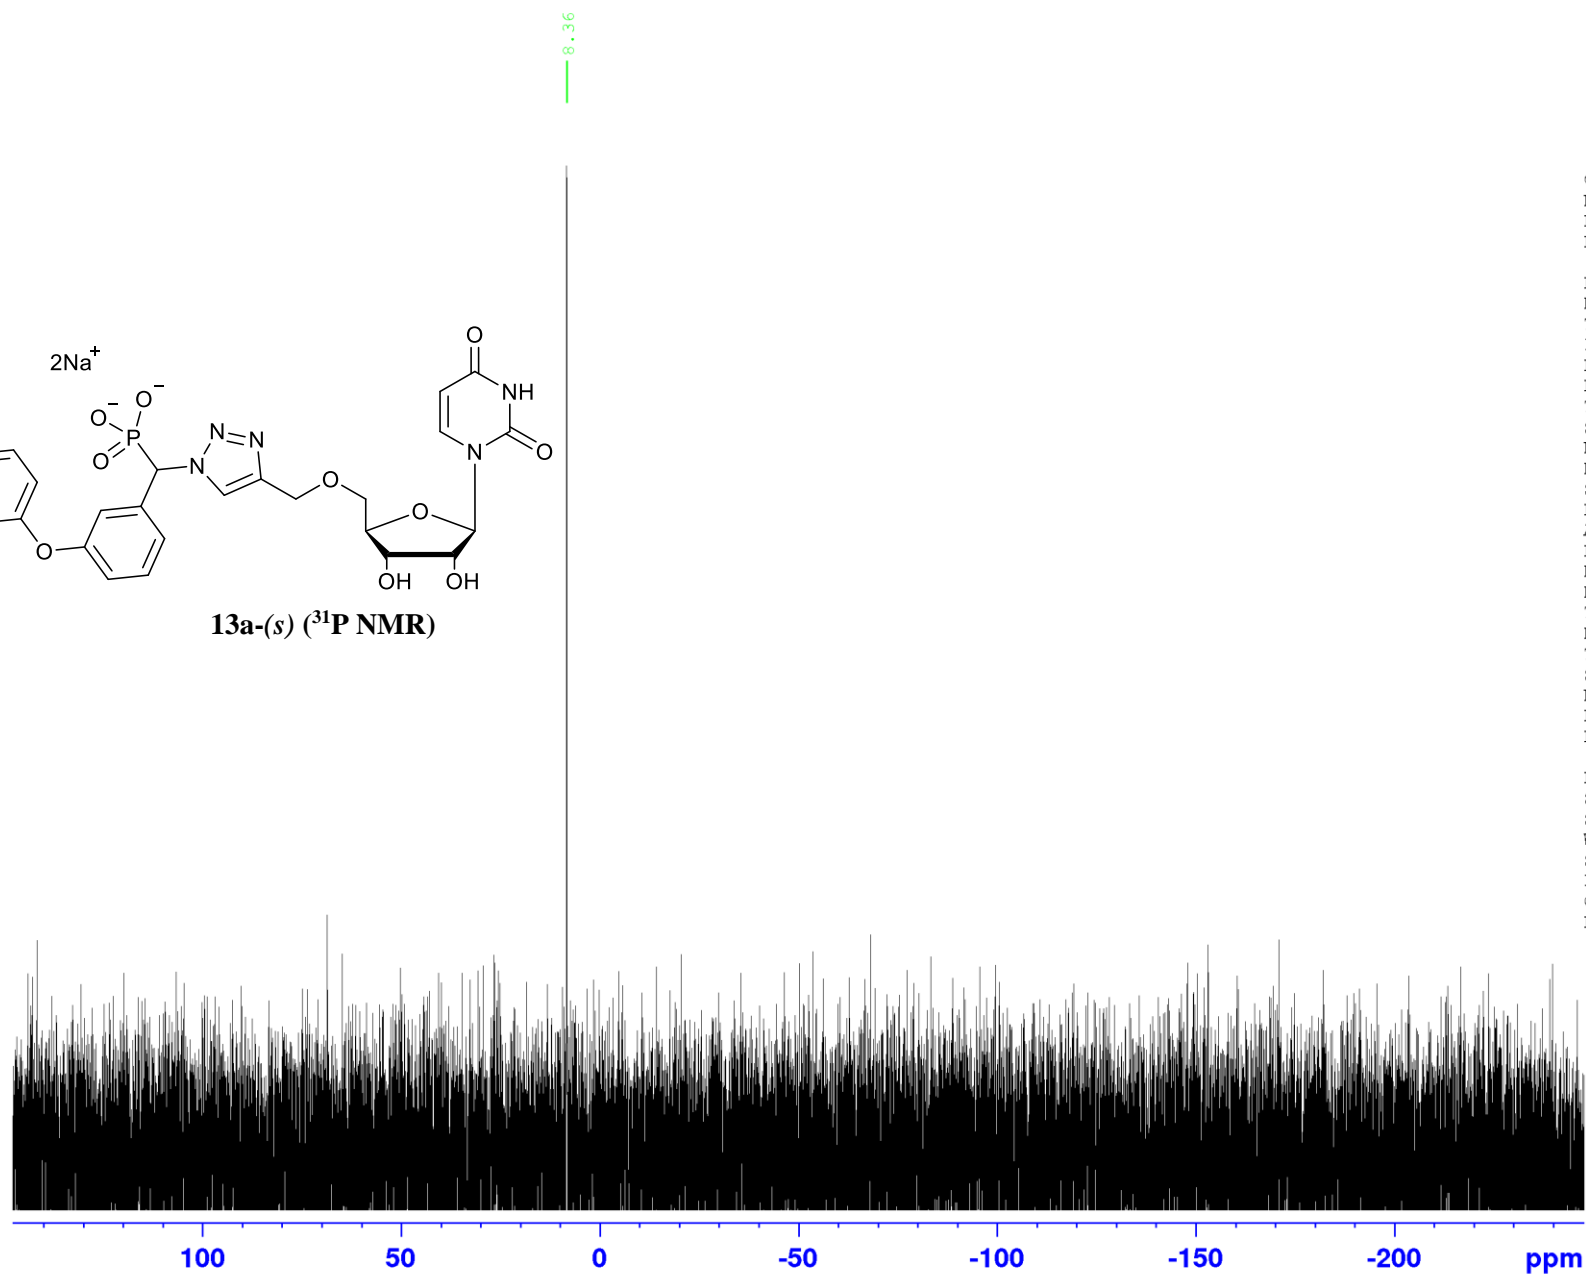

S50

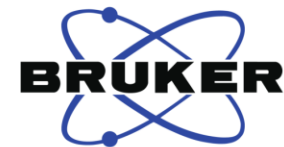

Current Data Parameters  
 NAME CD1071  
 EXPNO 1  
 PROCNO 1

F2 - Acquisition Parameters  
 Date\_ 20191213  
 Time 15.54 h  
 INSTRUM CAB AV4 500 MHZ BASIC  
 PROBHD Z150364\_0005 (   
 PULPROG zg30  
 TD 65536  
 SOLVENT CDCl3  
 NS 20  
 DS 2  
 SWH 10000.000 Hz  
 FIDRES 0.305176 Hz  
 AQ 3.2767999 sec  
 RG 101  
 DW 50.000 usec  
 DE 16.23 usec  
 TE 298.0 K  
 D1 1.00000000 sec  
 TD0 1  
 SFO1 499.7470859 MHz  
 NUC1 1H  
 P1 12.00 usec  
 PLW1 15.53100014 W

F2 - Processing parameters  
 SI 65536  
 SF 499.7452260 MHz  
 WDW EM  
 SSB 0  
 LB 0.30 Hz  
 GB 0  
 PC 1.00

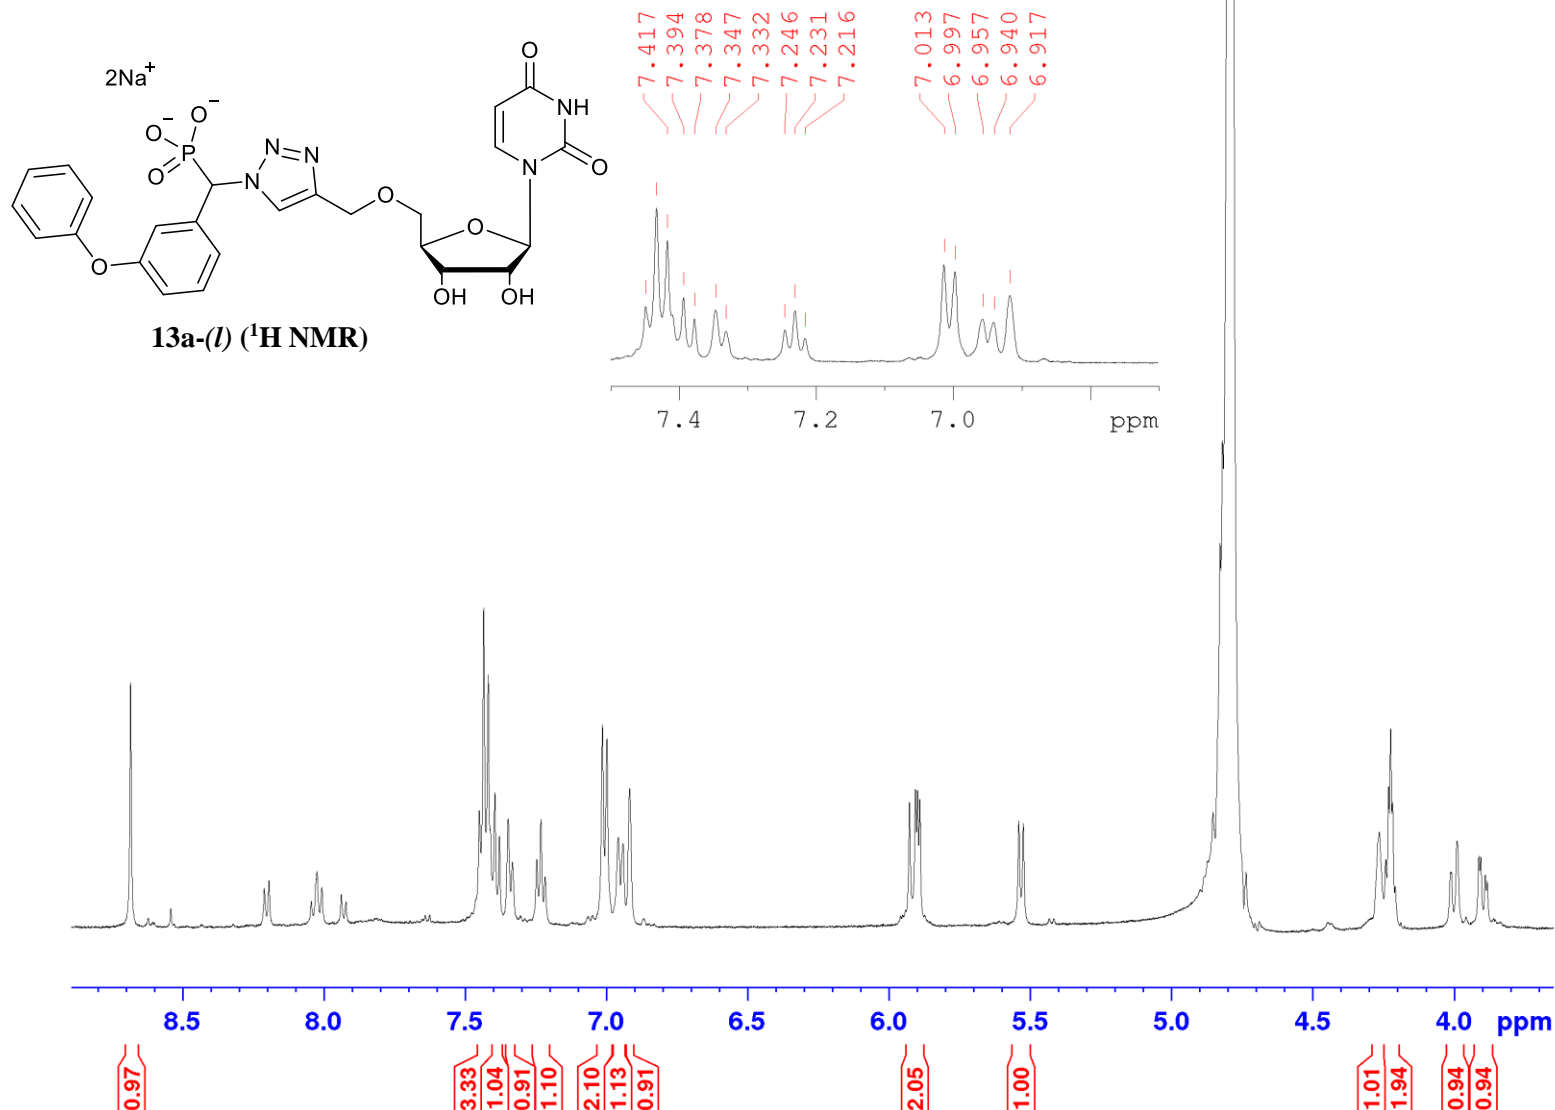

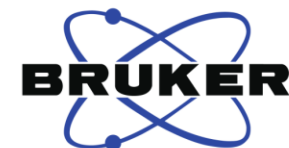

Current Data Parameters  
NAME CD1071  
EXPNO 3  
PROCNO 1

F2 - Acquisition Parameters  
Date\_ 20191214  
Time 17.41 h  
INSTRUM CAB AV4 500 MHZ BASIC  
PROBHD Z150364\_0005 (   
PULPROG zgpg30  
TD 65536  
SOLVENT CDCl3  
NS 3800  
DS 4  
SWH 30120.482 Hz  
FIDRES 0.919204 Hz  
AQ 1.0878977 sec  
RG 101  
DW 16.600 usec  
DE 18.00 usec  
TE 298.0 K  
D1 2.00000000 sec  
D11 0.03000000 sec  
TD0 1  
SFO1 125.6732948 MHz  
NUC1 13C  
P1 10.00 usec  
PLW1 51.23600006 W  
SFO2 499.7459990 MHz  
NUC2 1H  
CPDPRG2 waltz16  
PCPD2 80.00 usec  
PLW2 15.53100014 W  
PLW12 0.34944999 W  
PLW13 0.17549001 W

F2 - Processing parameters  
SI 32768  
SF 125.6608898 MHz  
WDW EM  
SSB 0  
LB 1.00 Hz  
GB 0  
PC 1.40

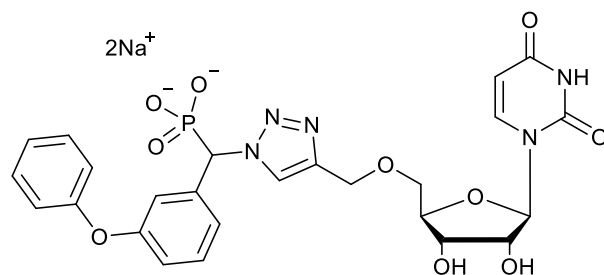

13a-(l) (<sup>13</sup>C NMR)

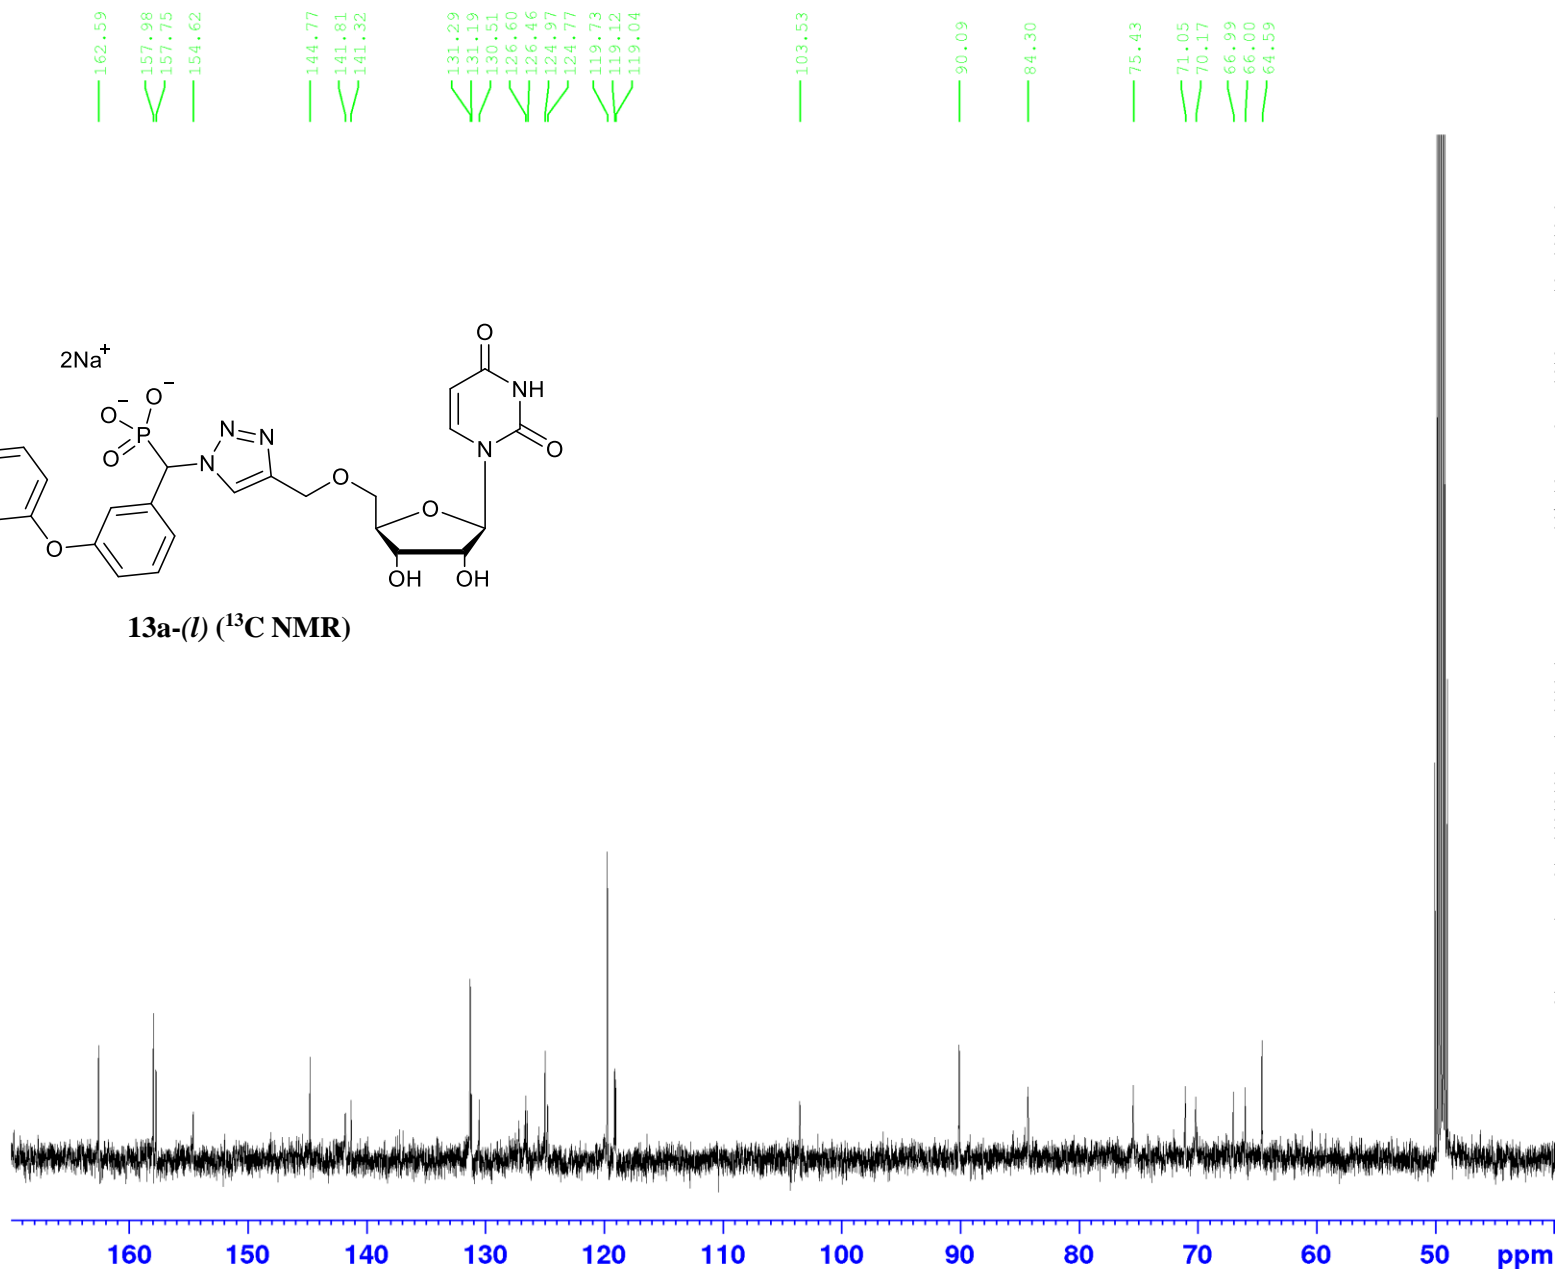

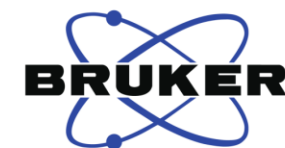

Current Data Parameters  
NAME CD1071  
EXPNO 5  
PROCNO 1

F2 - Acquisition Parameters  
Date\_ 20191214  
Time 18.13 h  
INSTRUM CAB AV4 500 MHZ BASIC  
PROBHD Z150364\_0005 (   
PULPROG zgpg30  
TD 65536  
SOLVENT CDCl3  
NS 16  
DS 4  
SWH 81967.211 Hz  
FIDRES 2.501441 Hz  
AQ 0.3997696 sec  
RG 101  
DW 6.100 usec  
DE 18.00 usec  
TE 298.0 K  
D1 2.00000000 sec  
D11 0.03000000 sec  
TD0 1  
SFO1 202.2899643 MHz  
NUC1 31P  
P1 12.00 usec  
PLW1 45.76100159 W  
SFO2 499.7459990 MHz  
NUC2 1H  
CPDPRG[2] waltz16  
PCPD2 80.00 usec  
PLW2 15.53100014 W  
PLW12 0.34944999 W  
PLW13 0.17549001 W

F2 - Processing parameters  
SI 32768  
SF 202.3000793 MHz  
WDW EM  
SSB 0  
LB 1.00 Hz  
GB 0  
PC 1.40

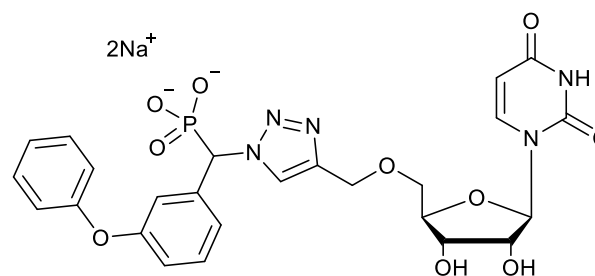

**13a-(l) (<sup>31</sup>P NMR)**

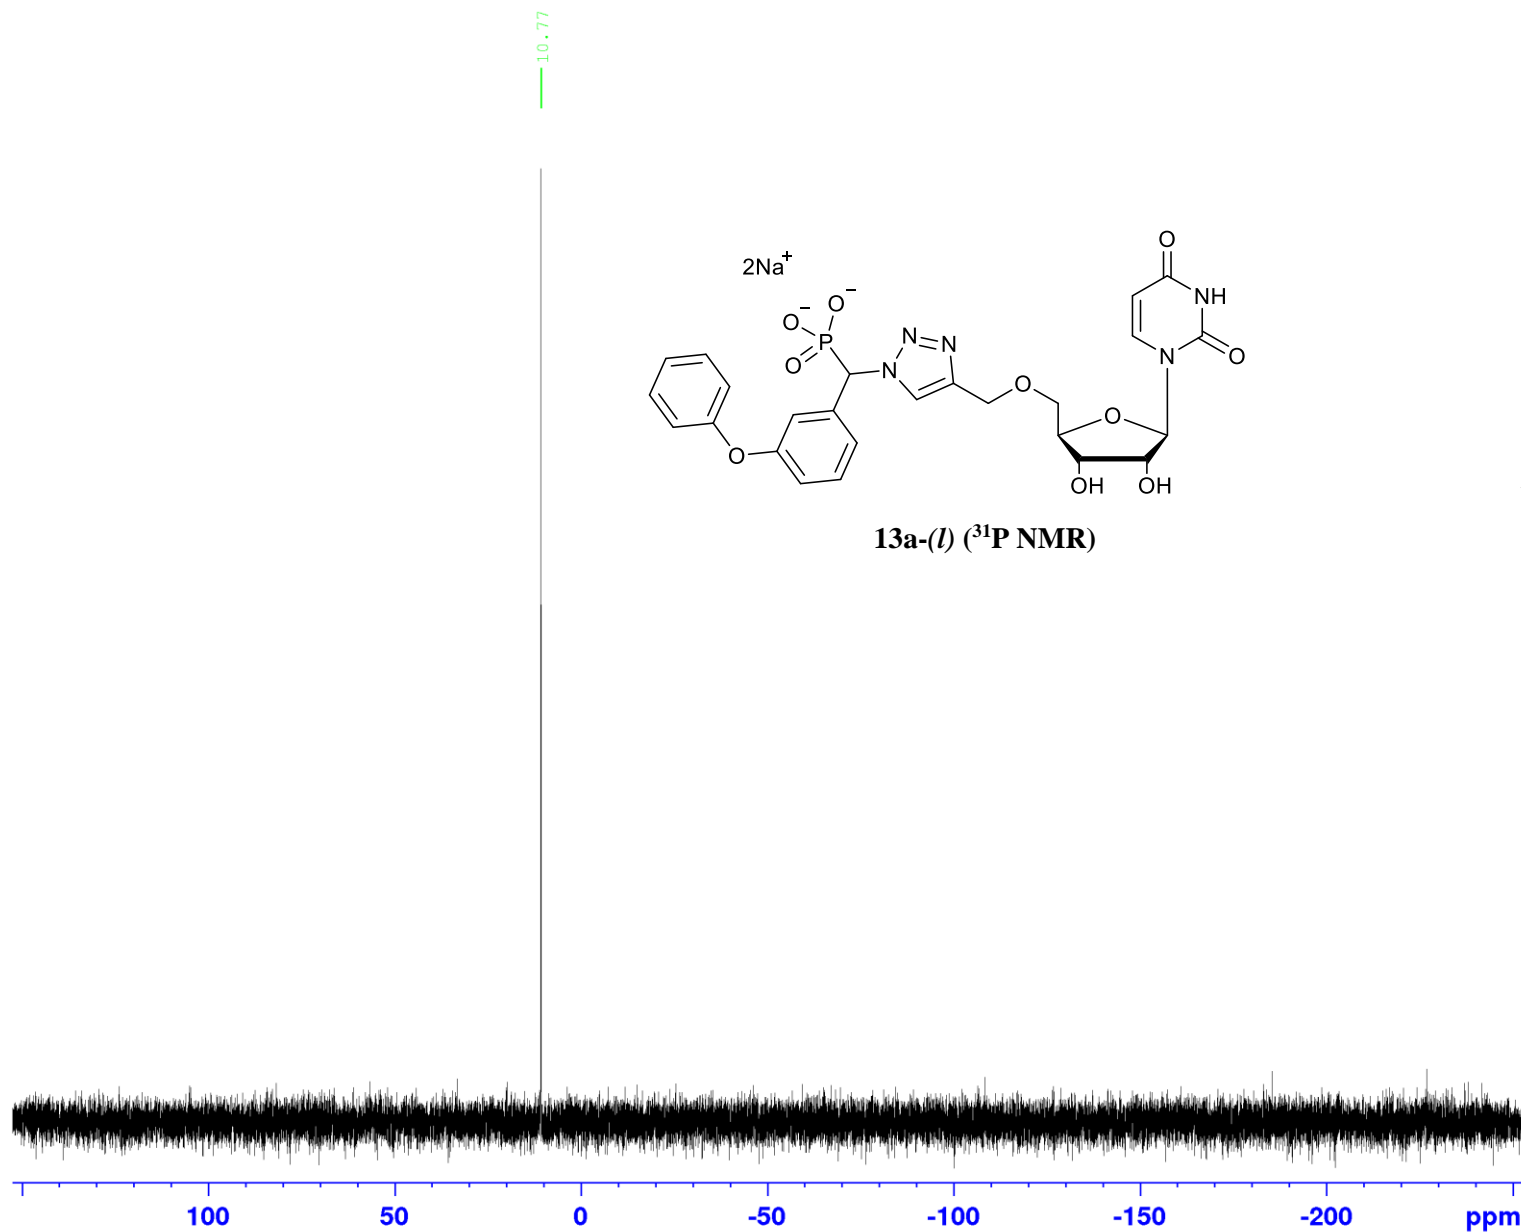

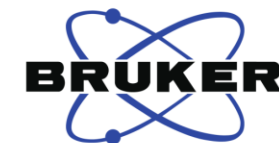

Current Data Parameters  
 NAME CD106s  
 EXPNO 1  
 PROCNO 1

F2 - Acquisition Parameters  
 Date\_ 20191212  
 Time 16.00 h  
 INSTRUM CAB AV4 500 MHZ BASIC  
 PROBHD Z150364\_0005 (zq30)  
 PULPROG zg30  
 TD 65536  
 SOLVENT CDCl3  
 NS 64  
 DS 2  
 SWH 10000.000 Hz  
 FIDRES 0.305176 Hz  
 AQ 3.2767999 sec  
 RG 101  
 DW 50.000 usec  
 DE 16.23 usec  
 TE 298.0 K  
 D1 1.00000000 sec  
 TD0 1  
 SFO1 499.7470859 MHz  
 NUC1 1H  
 P1 12.00 usec  
 PLW1 15.53100014 W

F2 - Processing parameters  
 SI 65536  
 SF 499.7452261 MHz  
 WDW EM  
 SSB 0  
 LB 0.30 Hz  
 GB 0  
 PC 1.00

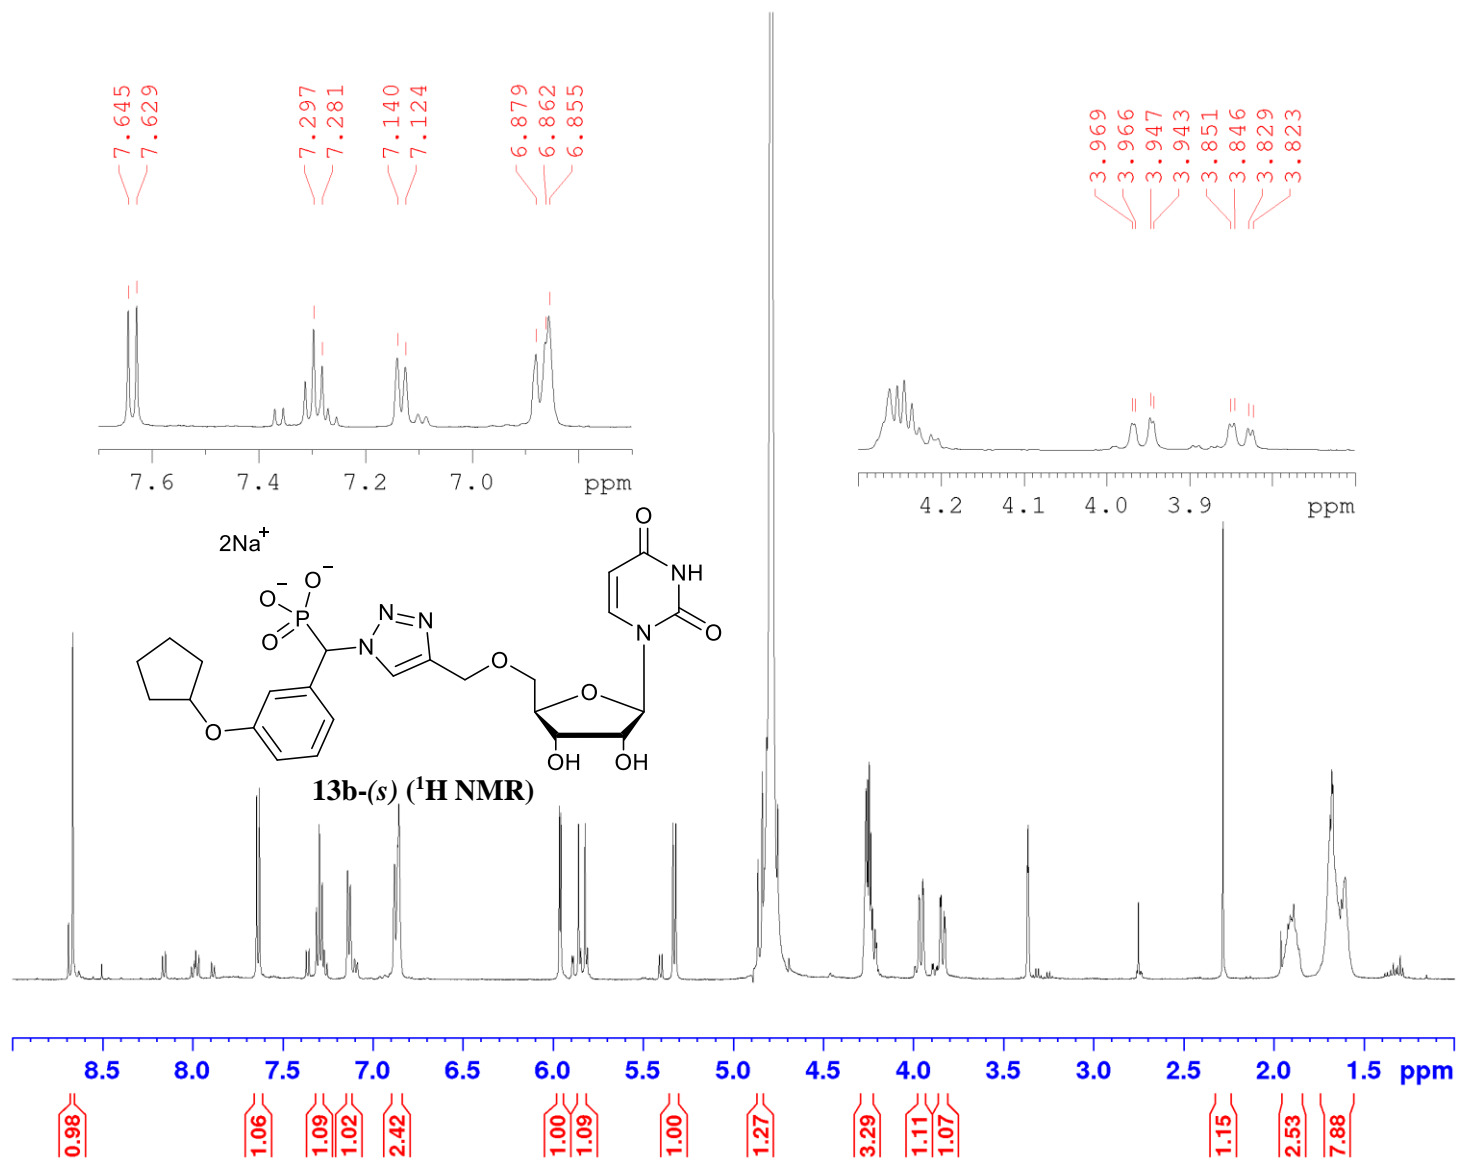

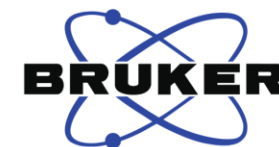

Current Data Parameters  
 NAME CD106s  
 EXPNO 3  
 PROCNO 1

F2 - Acquisition Parameters  
 Date\_ 20191213  
 Time 6.01 h  
 INSTRUM CAB AV4 500 MHZ BASIC  
 PROBHD Z150364\_0005 (zpgpg30)  
 PULPROG zgpg30  
 TD 65536  
 SOLVENT CDCl3  
 NS 3000  
 DS 4  
 SWH 30120.482 Hz  
 FIDRES 0.919204 Hz  
 AQ 1.0878977 sec  
 RG 101  
 DW 16.600 usec  
 DE 18.00 usec  
 TE 298.0 K  
 D1 2.0000000 sec  
 D11 0.0300000 sec  
 TD0 1  
 SFO1 125.6732948 MHz  
 NUC1 13C  
 P1 10.00 usec  
 PLW1 51.2360006 W  
 SFO2 499.7459990 MHz  
 NUC2 1H  
 CPDPRG2 waltz16  
 PCPD2 80.00 usec  
 PLW2 15.53100014 W  
 PLW12 0.34944999 W  
 PLW13 0.17549001 W

F2 - Processing parameters  
 SI 32768  
 SF 125.6608789 MHz  
 WDW EM  
 SSB 0  
 LB 1.00 Hz  
 GB 0  
 PC 1.40

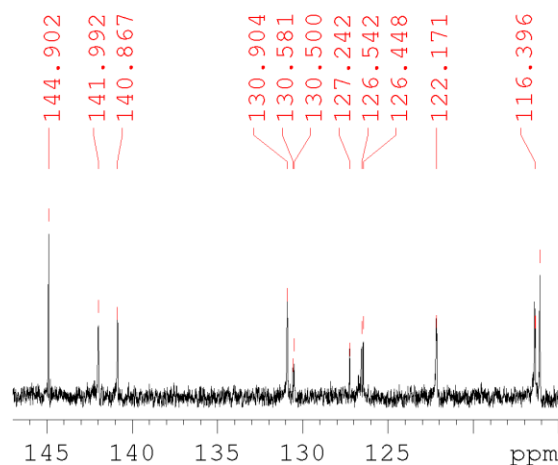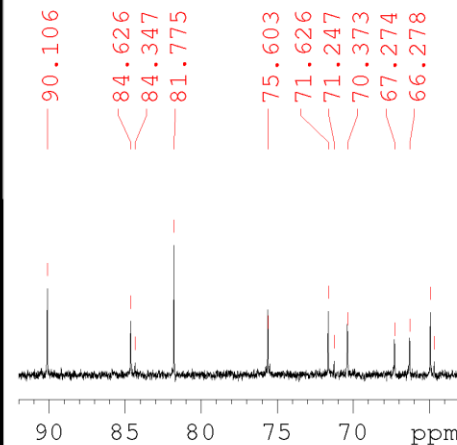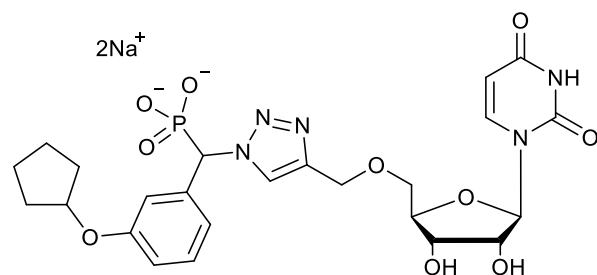

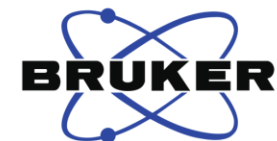

Current Data Parameters  
 NAME CD106s  
 EXPNO 5  
 PROCNO 1

F2 - Acquisition Parameters  
 Date\_ 20191213  
 Time 6.23 h  
 INSTRUM CAB AV4 500 MHZ BASIC  
 PROBHD Z150364\_0005 (zggg30)  
 PULPROG zgpg30  
 TD 65536  
 SOLVENT CDCl3  
 NS 16  
 DS 4  
 SWH 81967.211 Hz  
 FIDRES 2.501441 Hz  
 AQ 0.3997696 sec  
 RG 101  
 DW 6.100 usec  
 DE 18.00 usec  
 TE 298.0 K  
 D1 2.00000000 sec  
 D11 0.03000000 sec  
 TD0 1  
 SFO1 202.2899643 MHz  
 NUC1 31P  
 P1 12.00 usec  
 PLW1 45.76100159 W  
 SFO2 499.7459990 MHz  
 NUC2 1H  
 CPDPRG[2] waltz16  
 PCPD2 80.00 usec  
 PLW2 15.53100014 W  
 PLW12 0.34944999 W  
 PLW13 0.17549001 W

F2 - Processing parameters  
 SI 32768  
 SF 202.3000793 MHz  
 WDW EM  
 SSB 0  
 LB 1.00 Hz  
 GB 0  
 PC 1.40

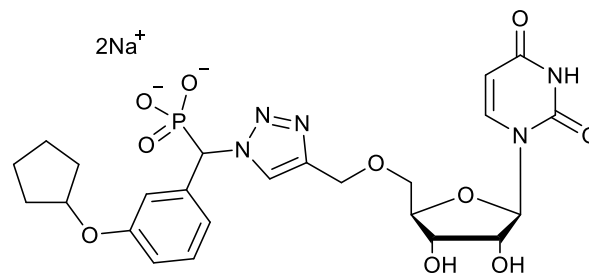

**13b-(s) (<sup>31</sup>P NMR)**

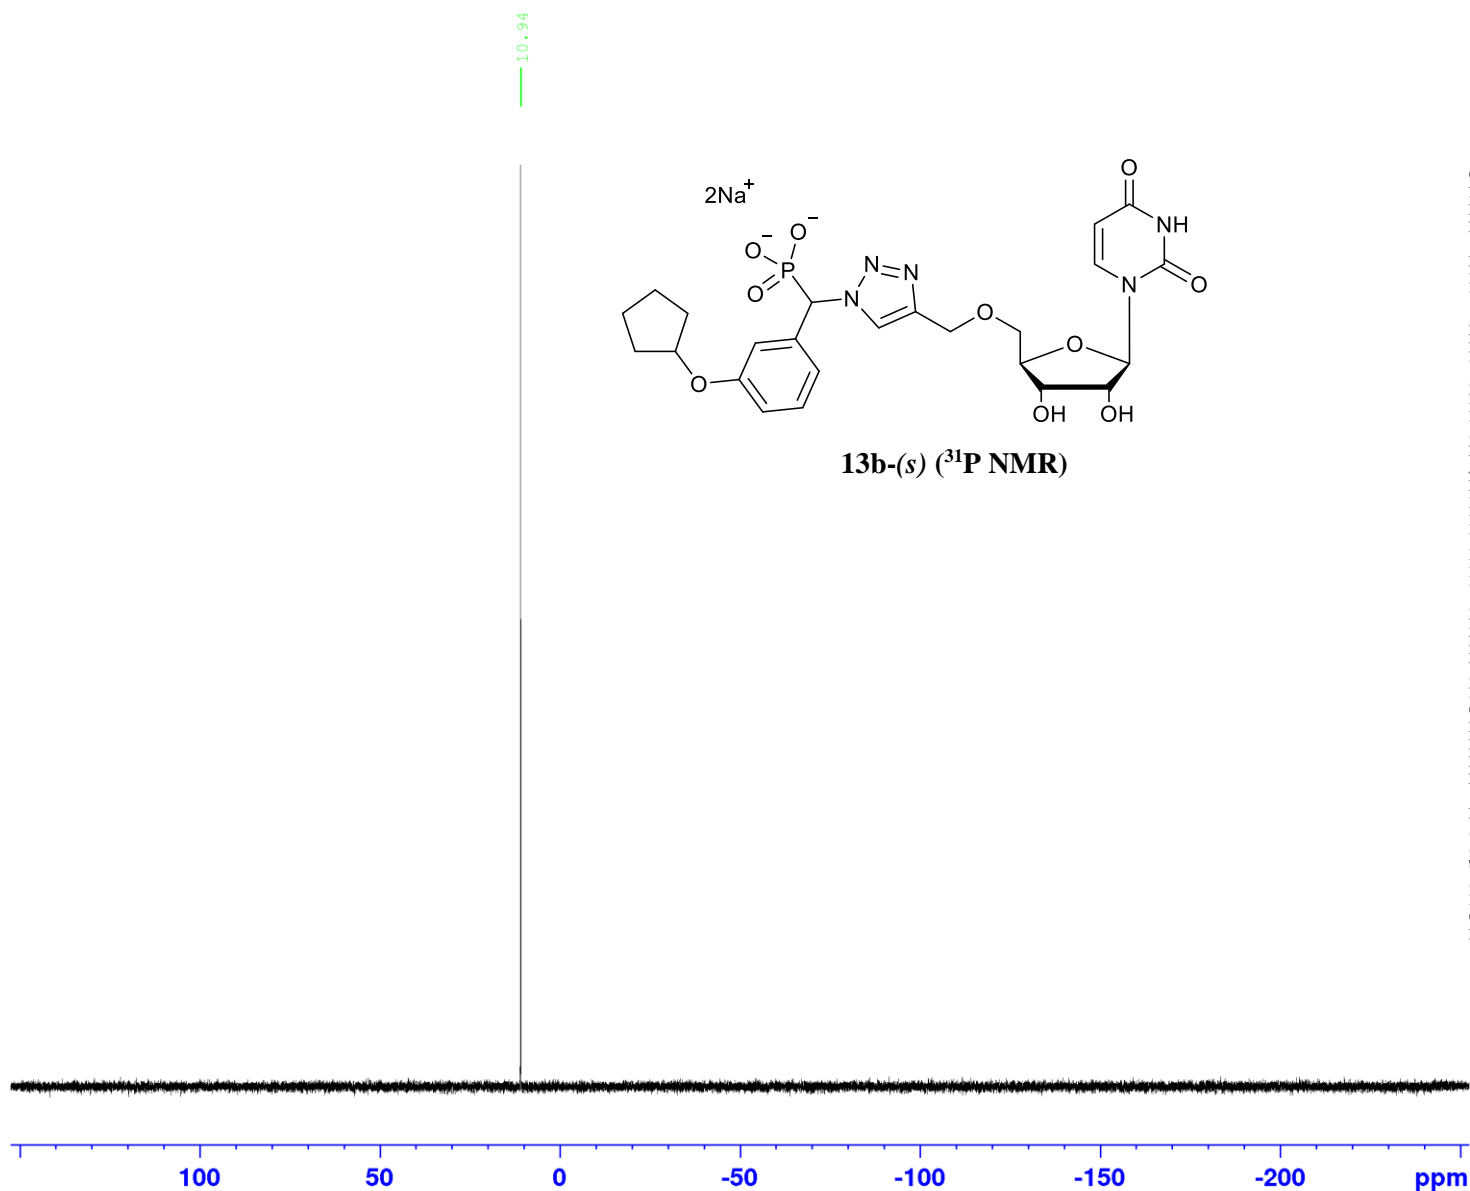

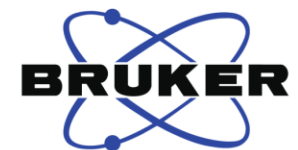

Current Data Parameters  
NAME cd9\_191211\_16  
EXPNO 1  
PROCNO 1

F2 - Acquisition Parameters  
Date\_ 20191211  
Time 10.01 h  
INSTRUM CAB AV4 500 MHZ BASIC  
PROBHD Z150364\_0005 (  
PULPROG zg30  
TD 65536  
SOLVENT D2O  
NS 16  
DS 2  
SWH 10000.000 Hz  
FIDRES 0.305176 Hz  
AQ 3.2767999 sec  
RG 101  
DW 50.000 usec  
DE 16.23 usec  
TE 298.0 K  
D1 1.00000000 sec  
TD0 1  
SFO1 499.7470859 MHz  
NUC1 1H  
P1 12.00 usec  
PLW1 15.53100014 W

F2 - Processing parameters  
SI 65536  
SF 499.7439563 MHz  
WDW EM  
SSB 0  
LB 0.30 Hz  
GB 0  
PC 1.00

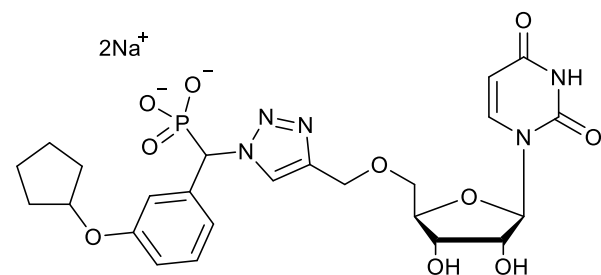

13b-(l) (<sup>1</sup>H NMR)

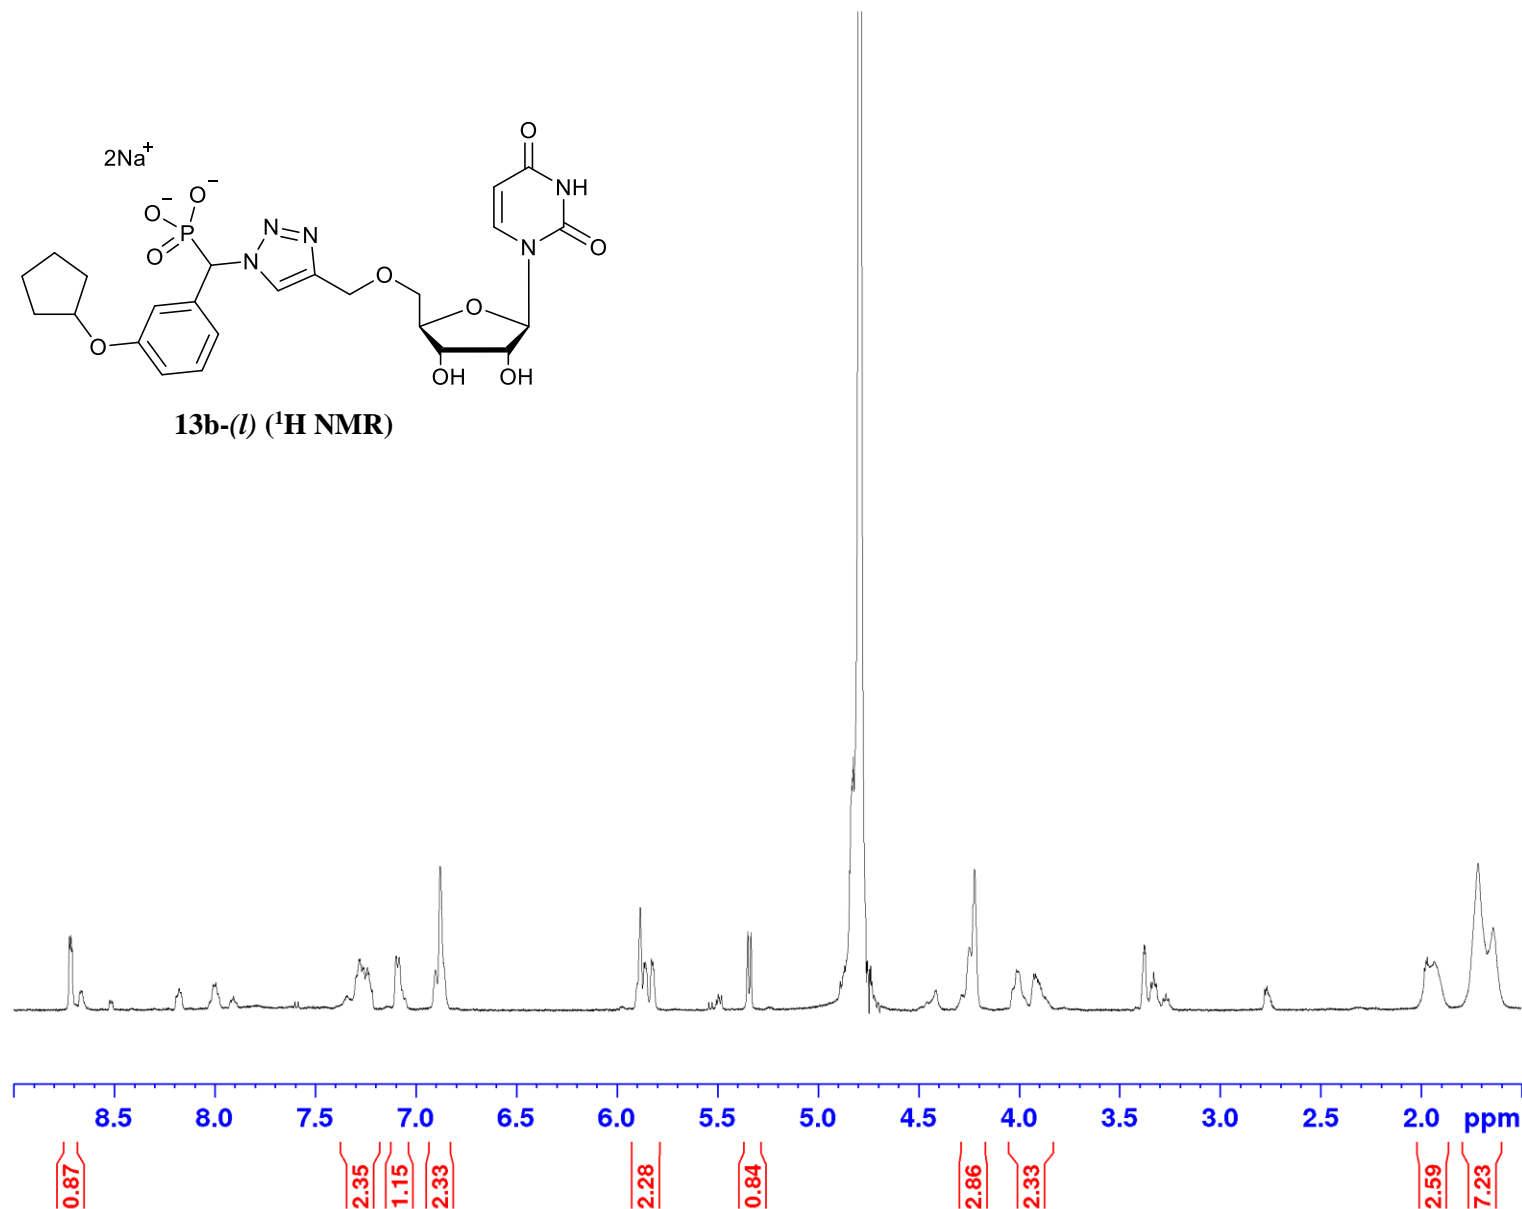

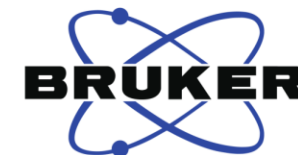

Current Data Parameters  
 NAME cd9\_191211\_16  
 EXPNO 3  
 PROCNO 1

F2 - Acquisition Parameters  
 Date\_ 20191212  
 Time 1.03 h  
 INSTRUM CAB AV4 500 MHZ BASIC  
 PROBHD Z150364\_0005 (   
 PULPROG zgpg30  
 TD 65536  
 SOLVENT D2O  
 NS 3000  
 DS 4  
 SWH 30120.482 Hz  
 FIDRES 0.919204 Hz  
 AQ 1.0878977 sec  
 RG 101  
 DW 16.600 usec  
 DE 18.00 usec  
 TE 298.0 K  
 D1 2.00000000 sec  
 D11 0.03000000 sec  
 TD0 1  
 SFO1 125.6732948 MHz  
 NUC1 13C  
 P1 10.00 usec  
 PLW1 51.23600006 W  
 SFO2 499.7459990 MHz  
 NUC2 1H  
 CPDPRG[2] waltz16  
 PCPD2 80.00 usec  
 PLW2 15.53100014 W  
 PLW12 0.34944999 W  
 PLW13 0.17549001 W

F2 - Processing parameters  
 SI 32768  
 SF 125.6607287 MHz  
 WDW EM  
 SSB 0  
 LB 1.00 Hz  
 GB 0  
 PC 1.40

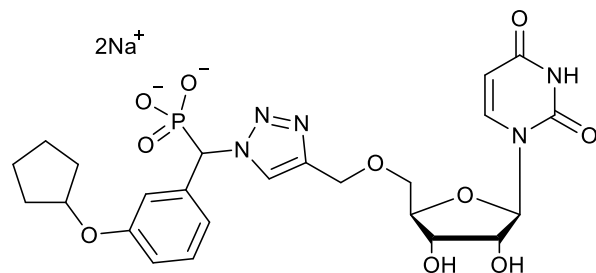

**13b-(I) (<sup>13</sup>C NMR)**

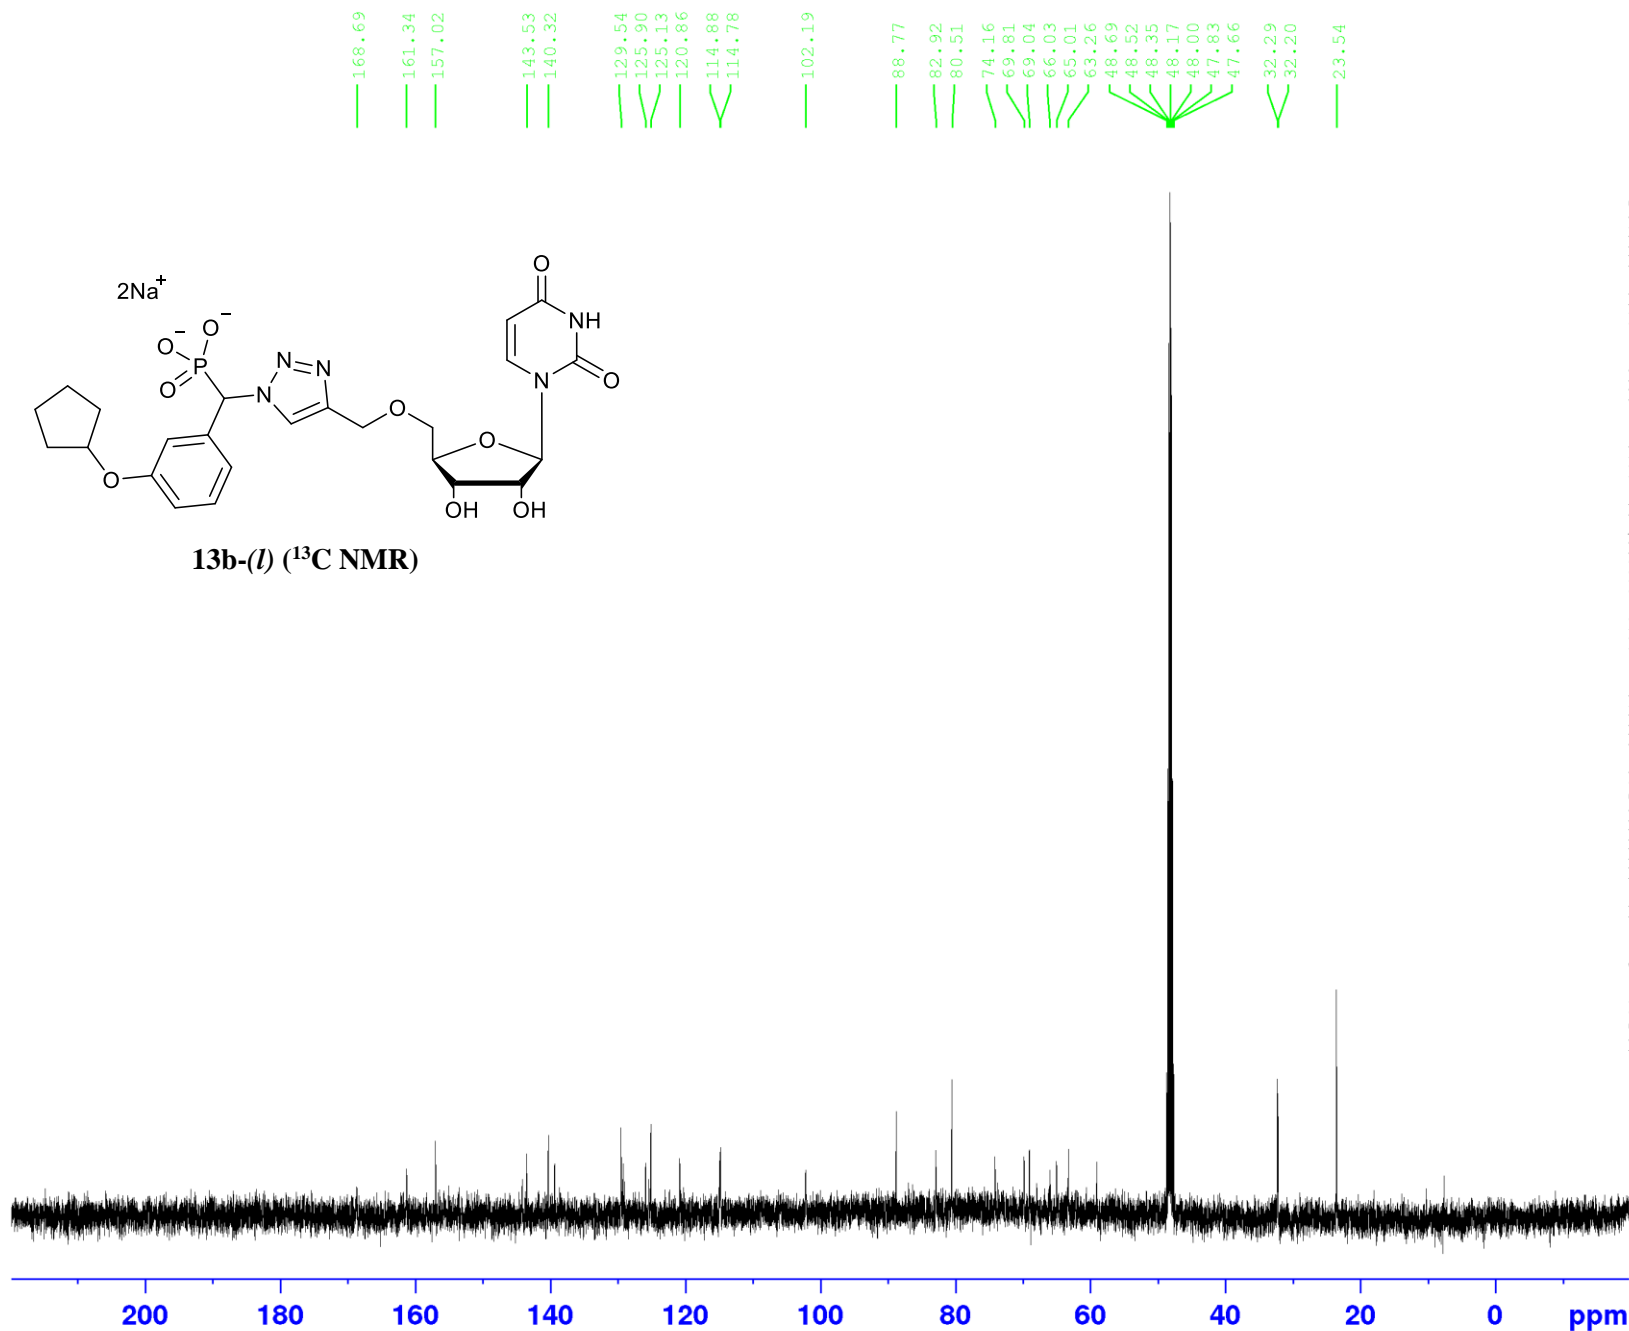

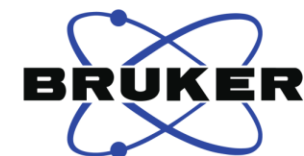

Current Data Parameters

NAME cd9\_200213\_53  
EXPNO 6  
PROCNO 1

F2 - Acquisition Parameters

Date\_ 20200213  
Time 22.04 h  
INSTRUM CAB AV4 500 MHZ BASIC  
PROBHD Z150364\_0005 (  
PULPROG zgpg30  
TD 65536  
SOLVENT D2O  
NS 16  
DS 4  
SWH 81967.211 Hz  
FIDRES 2.501441 Hz  
AQ 0.3997696 sec  
RG 101  
DW 6.100 usec  
DE 18.00 usec  
TE 286.1 K  
D1 2.00000000 sec  
D11 0.03000000 sec  
TD0 1  
SF01 202.2899643 MHz  
NUC1 31P  
P1 12.00 usec  
PLW1 45.76100159 W  
SF02 499.7459990 MHz  
NUC2 1H  
CPDPRG2 waltz16  
PCPD2 80.00 usec  
PLW2 15.53100014 W  
PLW12 0.34944999 W  
PLW13 0.17549001 W

F2 - Processing parameters

SI 32768  
SF 202.3000793 MHz  
WDW EM  
SSB 0  
LB 1.00 Hz  
GB 0  
PC 1.40

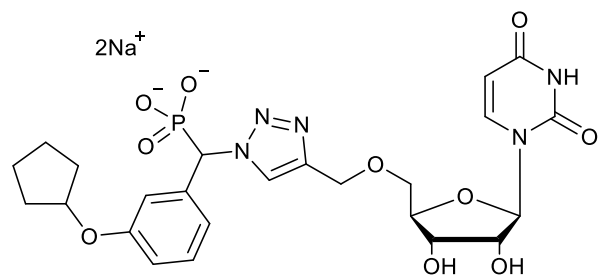

13b-(l) (<sup>31</sup>P NMR)

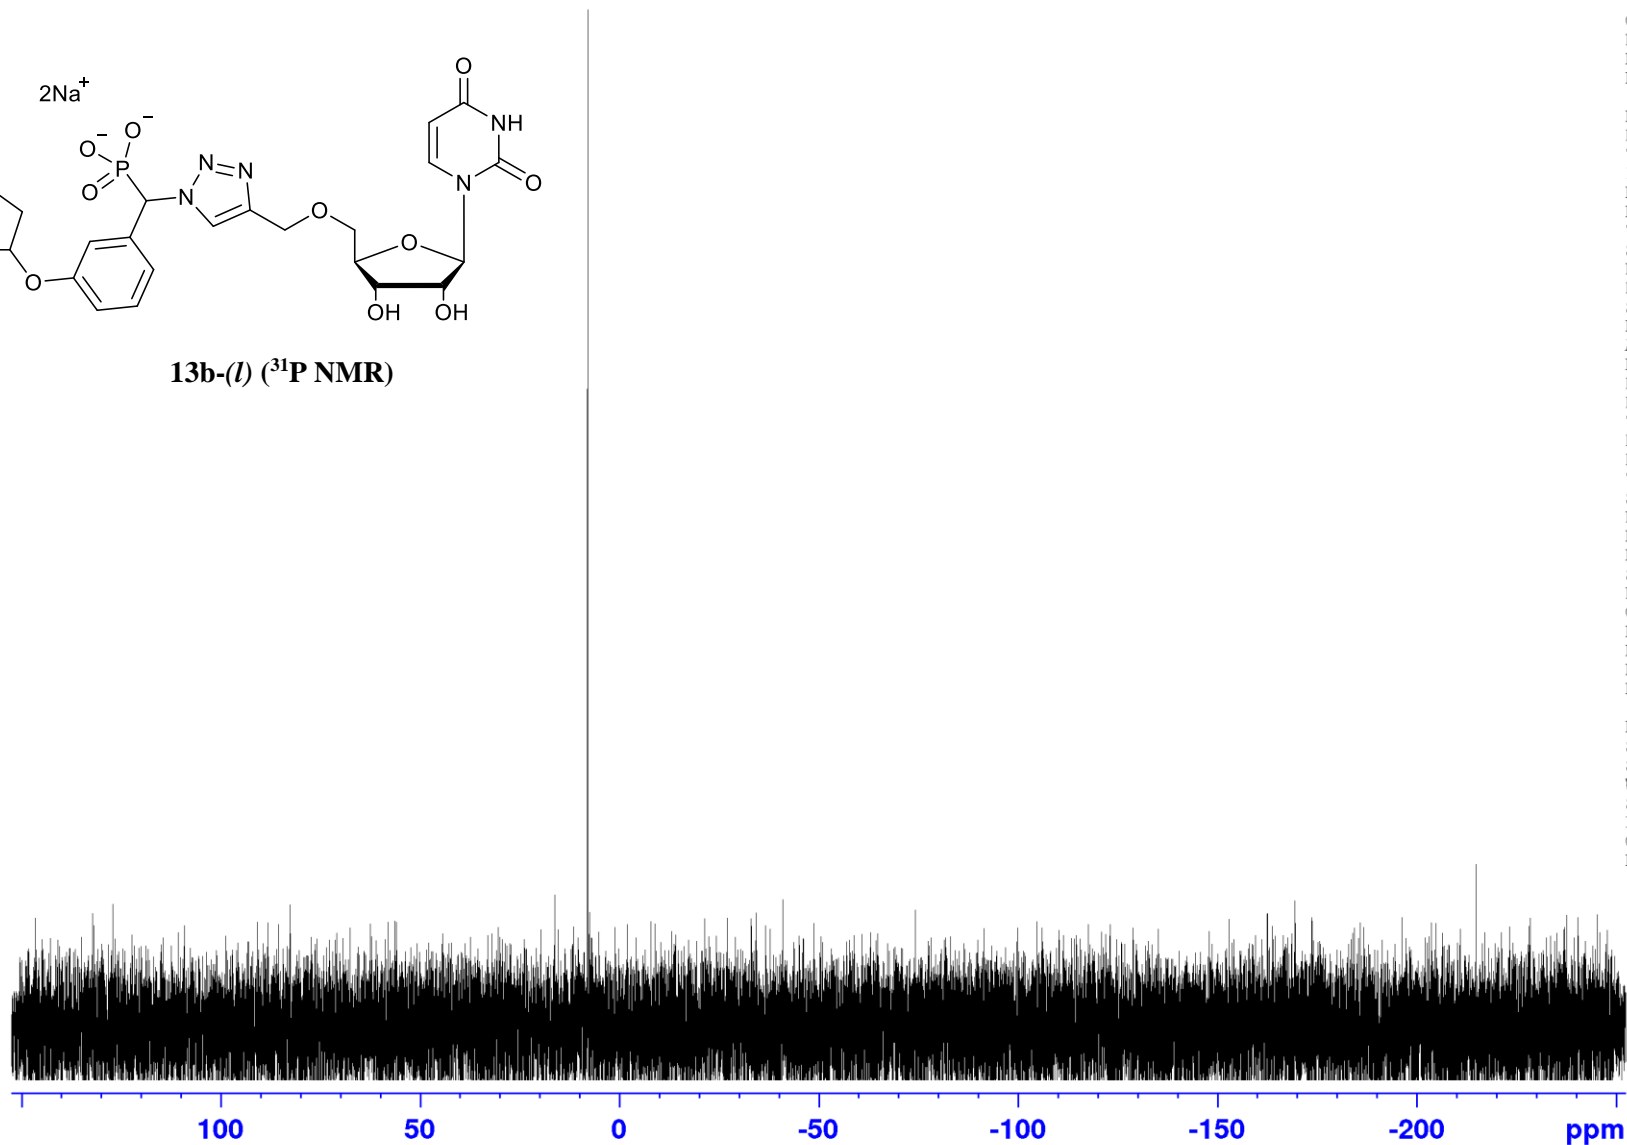

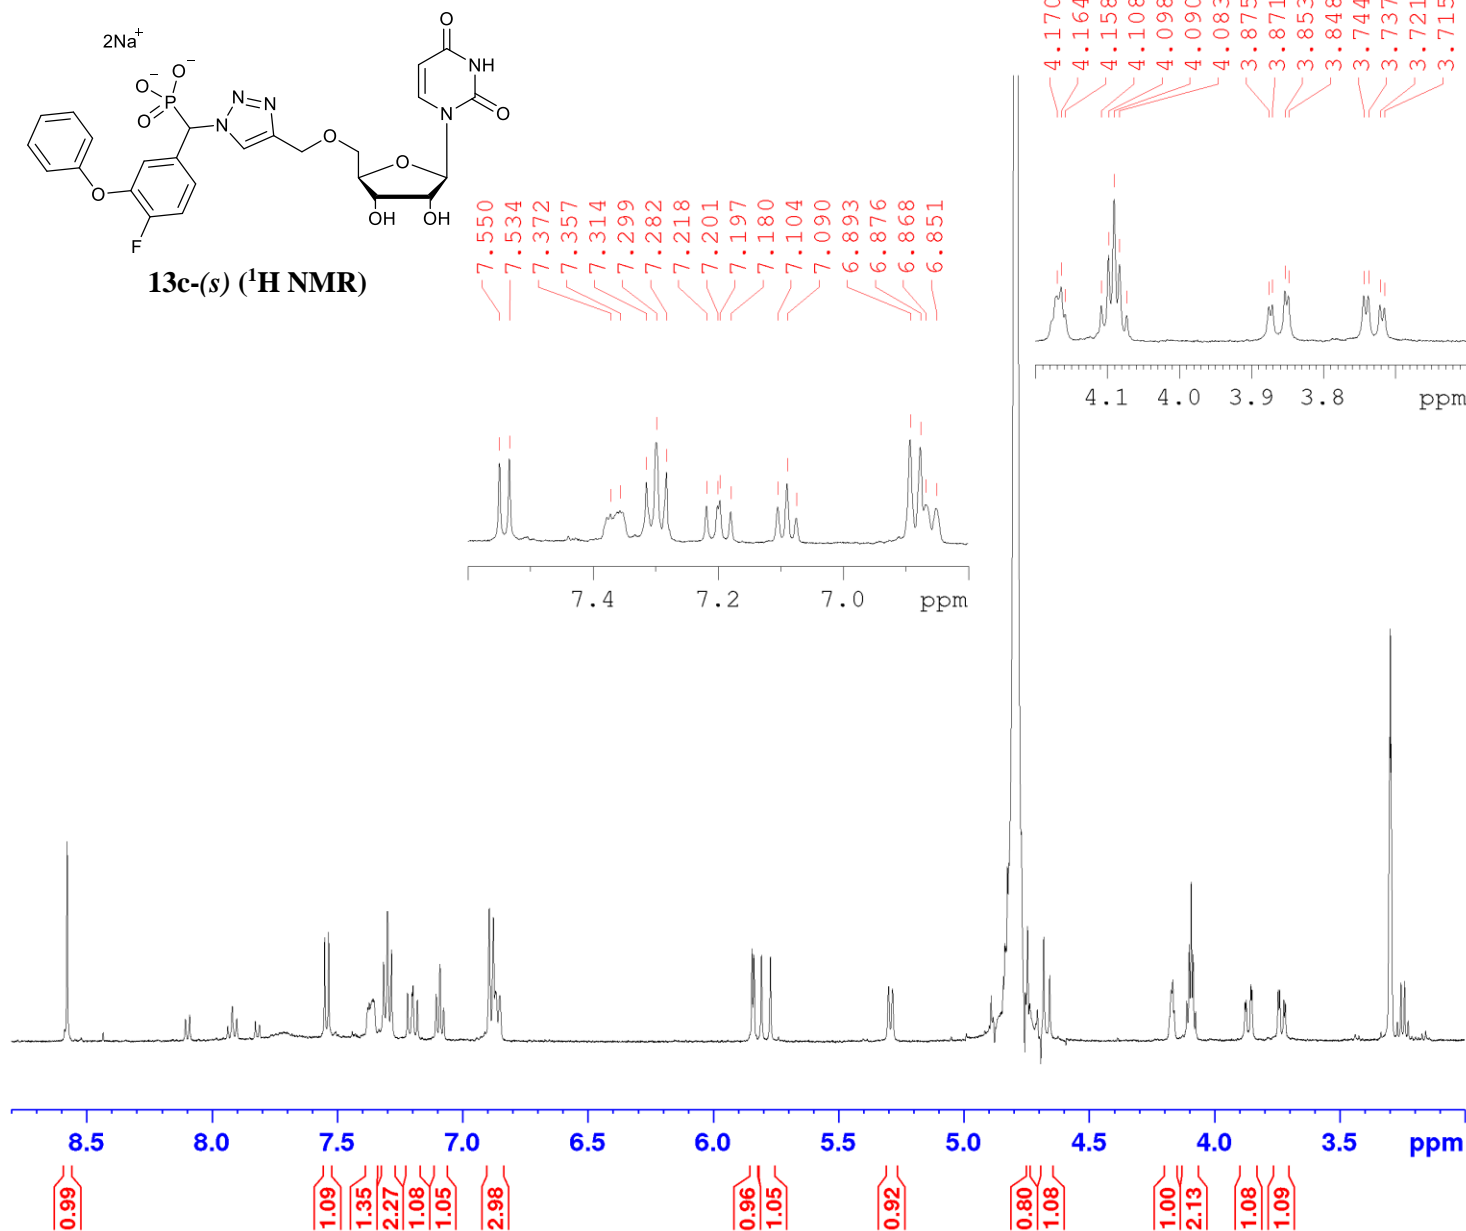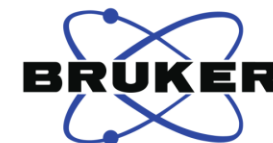

Current Data Parameters  
NAME CD67\_s  
EXPNO 5  
PROCNO 1

F2 - Acquisition Parameters  
Date\_ 20181011  
Time 15.27 h  
INSTRUM CAB AV4 500 MHZ BASIC  
PROBHD Z150364\_0005 (zg30)  
PULPROG 65536  
TD 16  
SOLVENT D2O  
NS 2  
DS 10000.000 Hz  
SWH 0.305176 Hz  
FIDRES 3.2767999 sec  
AQ 92.3077  
RG 50.000 usec  
DE 16.23 usec  
TE 298.0 K  
D1 1.00000000 sec  
TD0 1  
SF01 499.7470859 MHz  
NUC1 1H  
P1 12.00 usec  
PLW1 15.53100014 W

F2 - Processing parameters  
SI 65536  
SF 499.7439580 MHz  
WDW EM  
SSB 0  
LB 0.30 Hz  
GB 0  
PC 1.00

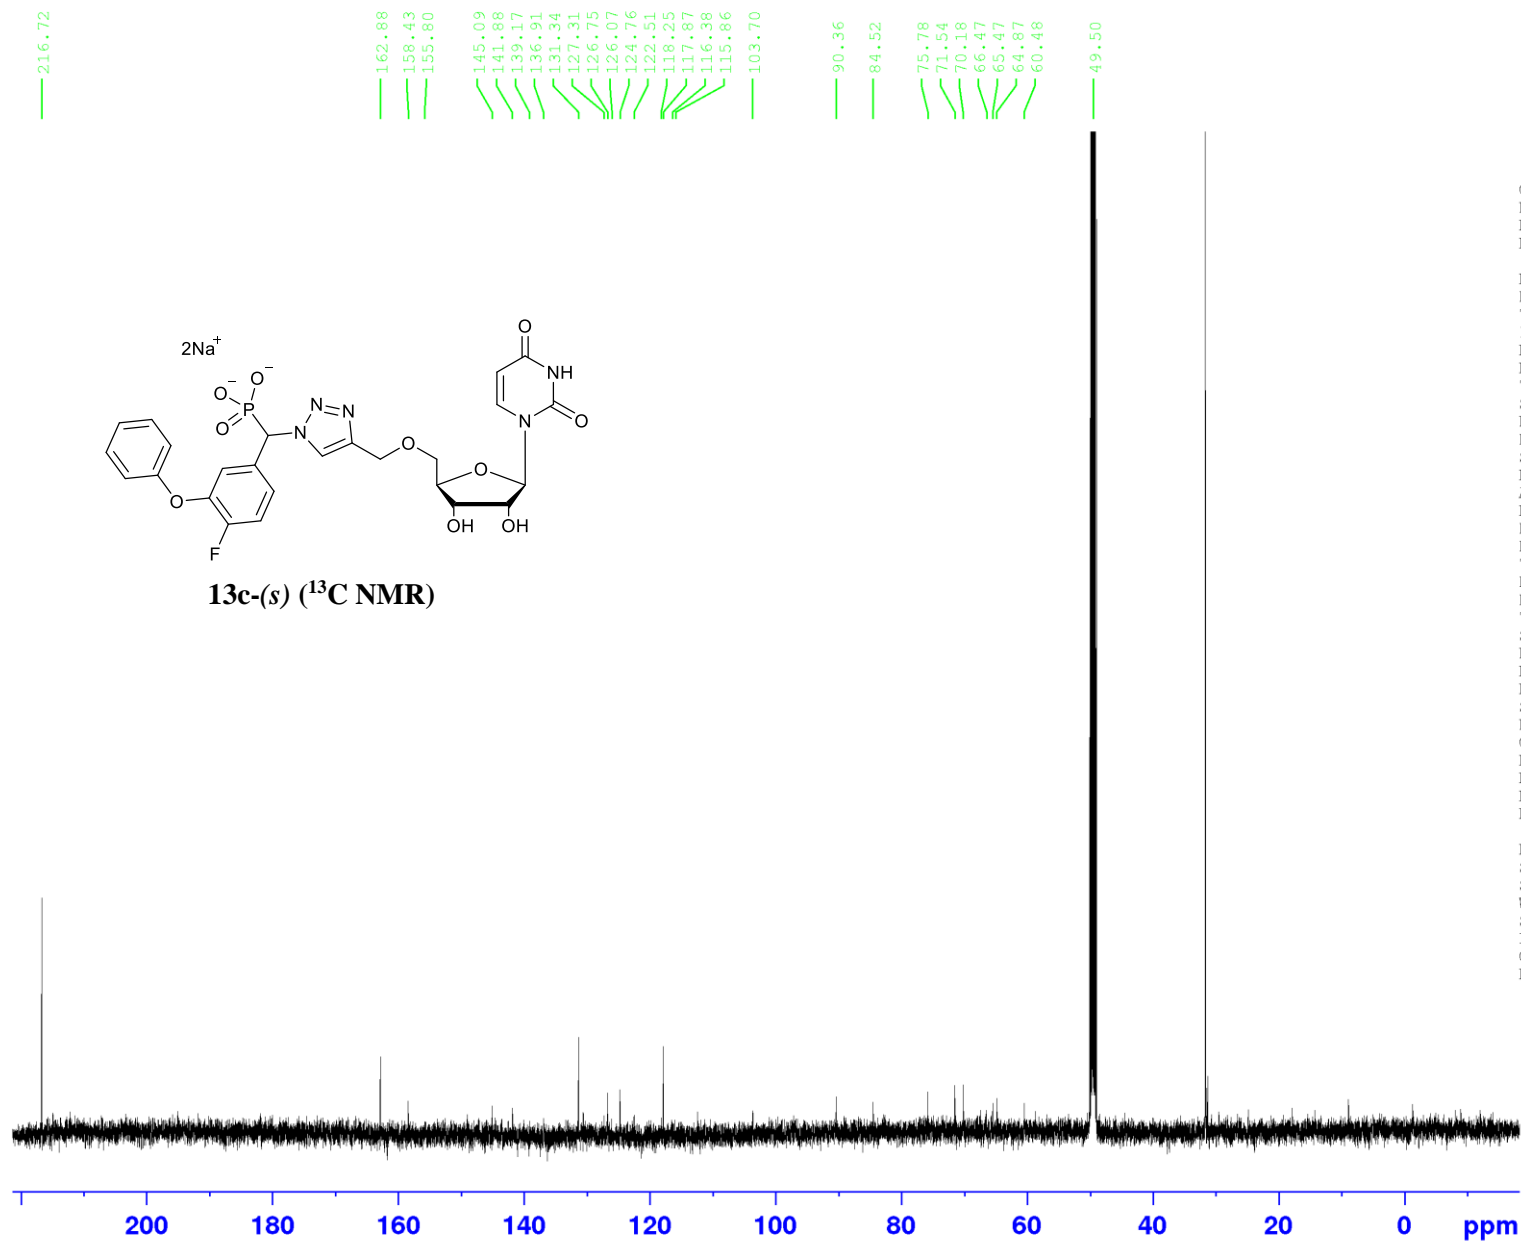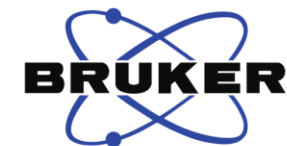

Current Data Parameters  
 NAME CD67\_s  
 EXPNO 8  
 PROCNO 1

F2 - Acquisition Parameters  
 Date\_ 20181012  
 Time 0.17 h  
 INSTRUM CAB AV4 500 MHZ BASIC  
 PROBHD Z150364\_0005 (   
 PULPROG zgpg30  
 TD 65536  
 SOLVENT D2O  
 NS 2056  
 DS 4  
 SWH 30120.482 Hz  
 FIDRES 0.919204 Hz  
 AQ 1.0878977 sec  
 RG 101  
 DW 16.600 usec  
 DE 18.00 usec  
 TE 298.0 K  
 D1 2.00000000 sec  
 D11 0.03000000 sec  
 TD0 1  
 SFO1 125.6732948 MHz  
 NUC1  $^{13}\text{C}$   
 P1 10.00 usec  
 PLW1 51.23600006 W  
 SFO2 499.7459990 MHz  
 NUC2  $^1\text{H}$   
 CPDPRG[2] waltz16  
 PCPD2 80.00 usec  
 PLW2 15.53100014 W  
 PLW12 0.34944999 W  
 PLW13 0.17549001 W

F2 - Processing parameters  
 SI 32768  
 SF 125.6605389 MHz  
 WDW EM  
 SSB 0  
 LB 1.00 Hz  
 GB 0  
 PC 1.40

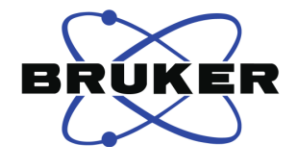

Current Data Parameters  
NAME CD67\_s  
EXPNO 10  
PROCNO 1

F2 - Acquisition Parameters  
Date\_ 20181012  
Time 0.21 h  
INSTRUM CAB AV4 500 MHZ BASIC  
PROBHD Z150364\_0005 (  
PULPROG zgpg30  
TD 65536  
SOLVENT D2O  
NS 16  
DS 4  
SWH 81967.211 Hz  
FIDRES 2.501441 Hz  
AQ 0.3997696 sec  
RG 101  
DW 6.100 usec  
DE 18.00 usec  
TE 298.0 K  
D1 2.00000000 sec  
D11 0.03000000 sec  
TD0 1  
SFO1 202.2899643 MHz  
NUC1 31P  
P1 12.00 usec  
PLW1 45.76100159 W  
SFO2 499.7459990 MHz  
NUC2 1H  
CPDPRG2 waltz16  
PCPD2 80.00 usec  
PLW2 15.53100014 W  
PLW12 0.34944999 W  
PLW13 0.17549001 W

F2 - Processing parameters  
SI 32768  
SF 202.3000793 MHz  
WDW EM  
SSB 0  
LB 1.00 Hz  
GB 0  
PC 1.40

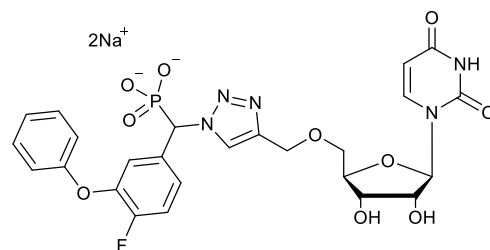

**13c-(s) (<sup>31</sup>P NMR)**

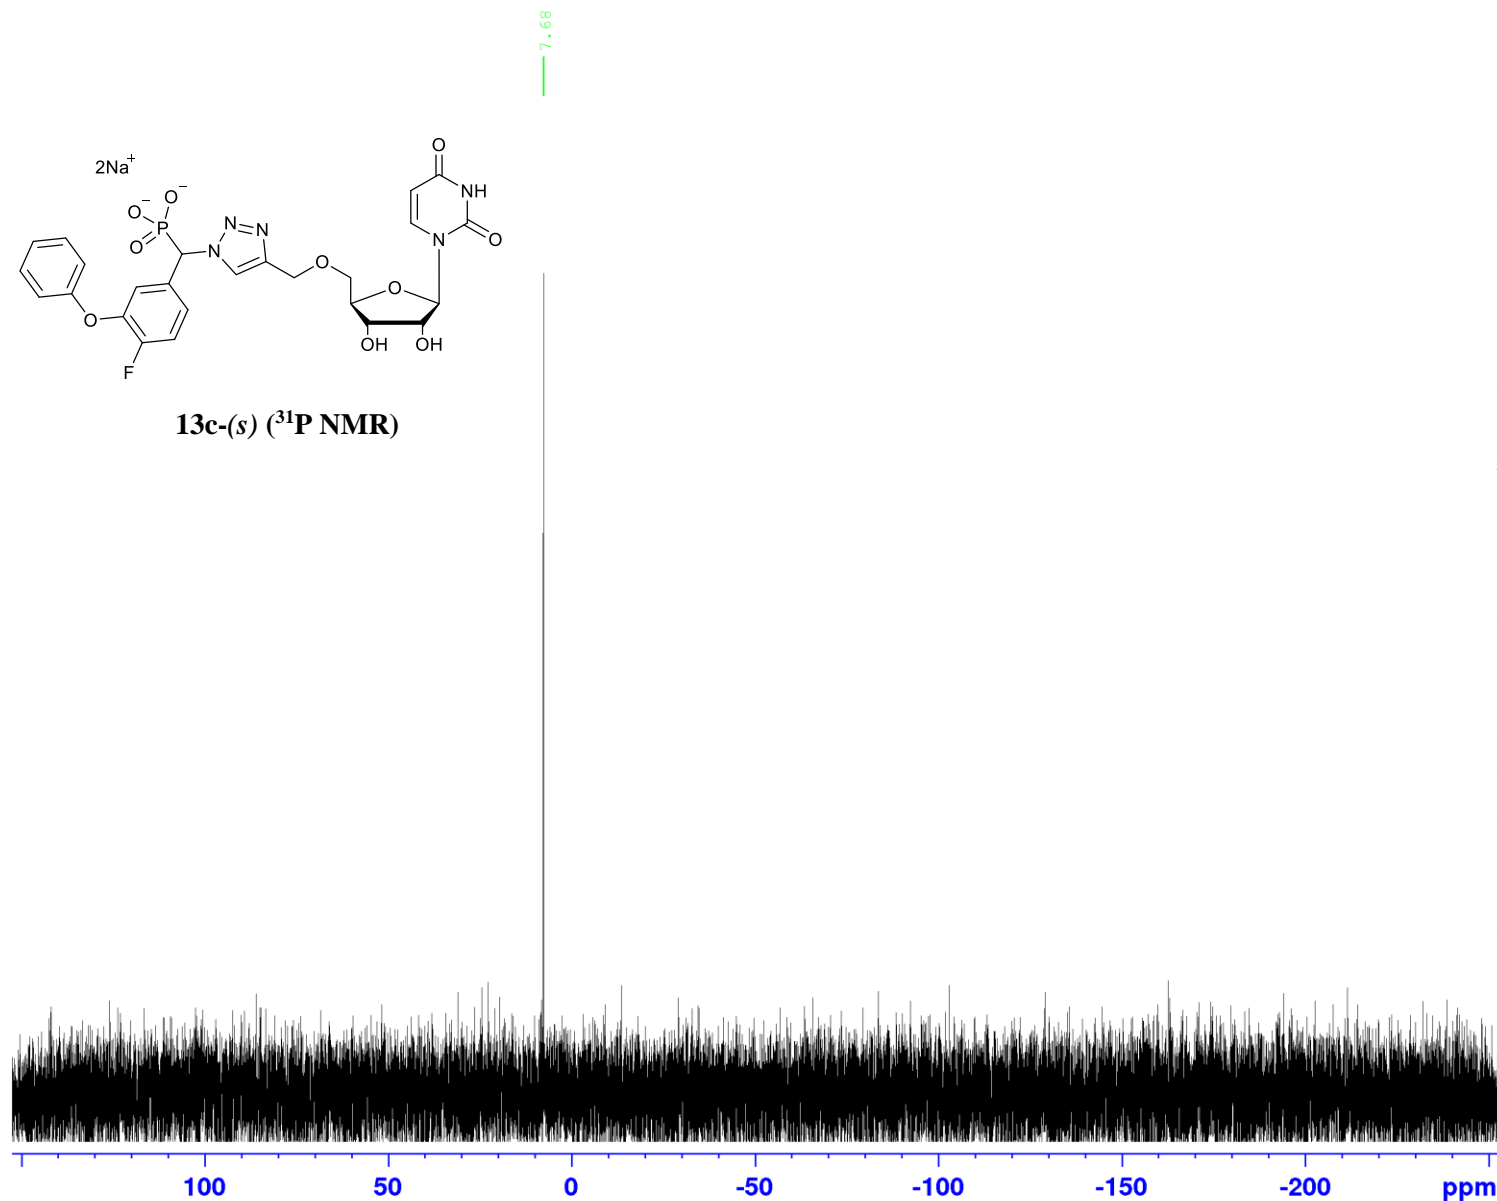

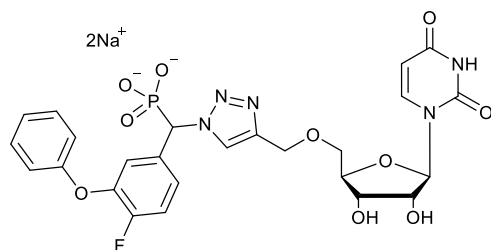

**13c-(s) ( $^{19}\text{F}$  NMR)**

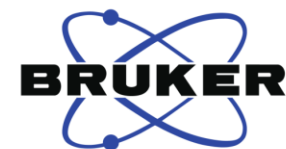

Current Data Parameters  
 NAME cd2\_200107\_17  
 EXPNO 1  
 PROCNO 1

F2 - Acquisition Parameters  
 Date\_ 20200107  
 Time 9.47 h  
 INSTRUM spect  
 PROBHD Z108618\_0921 (  
 PULPROG zgfglqn  
 TD 65536  
 SOLVENT D2O  
 NS 64  
 DS 0  
 SWH 89285.711 Hz  
 FIDRES 2.724784 Hz  
 AQ 0.3670016 sec  
 RG 196.38  
 DW 5.600 usec  
 DE 120.00 usec  
 TE 298.7 K  
 D1 1.00000000 sec  
 TD0 1  
 SF01 376.4889413 MHz  
 NUC1  $^{19}\text{F}$   
 P1 15.00 usec  
 PLW1 17.75399971 W

F2 - Processing parameters  
 SI 65536  
 SF 376.5265940 MHz  
 WDW EM  
 SSB 0  
 LB 0.30 Hz  
 GB 0  
 PC 1.00

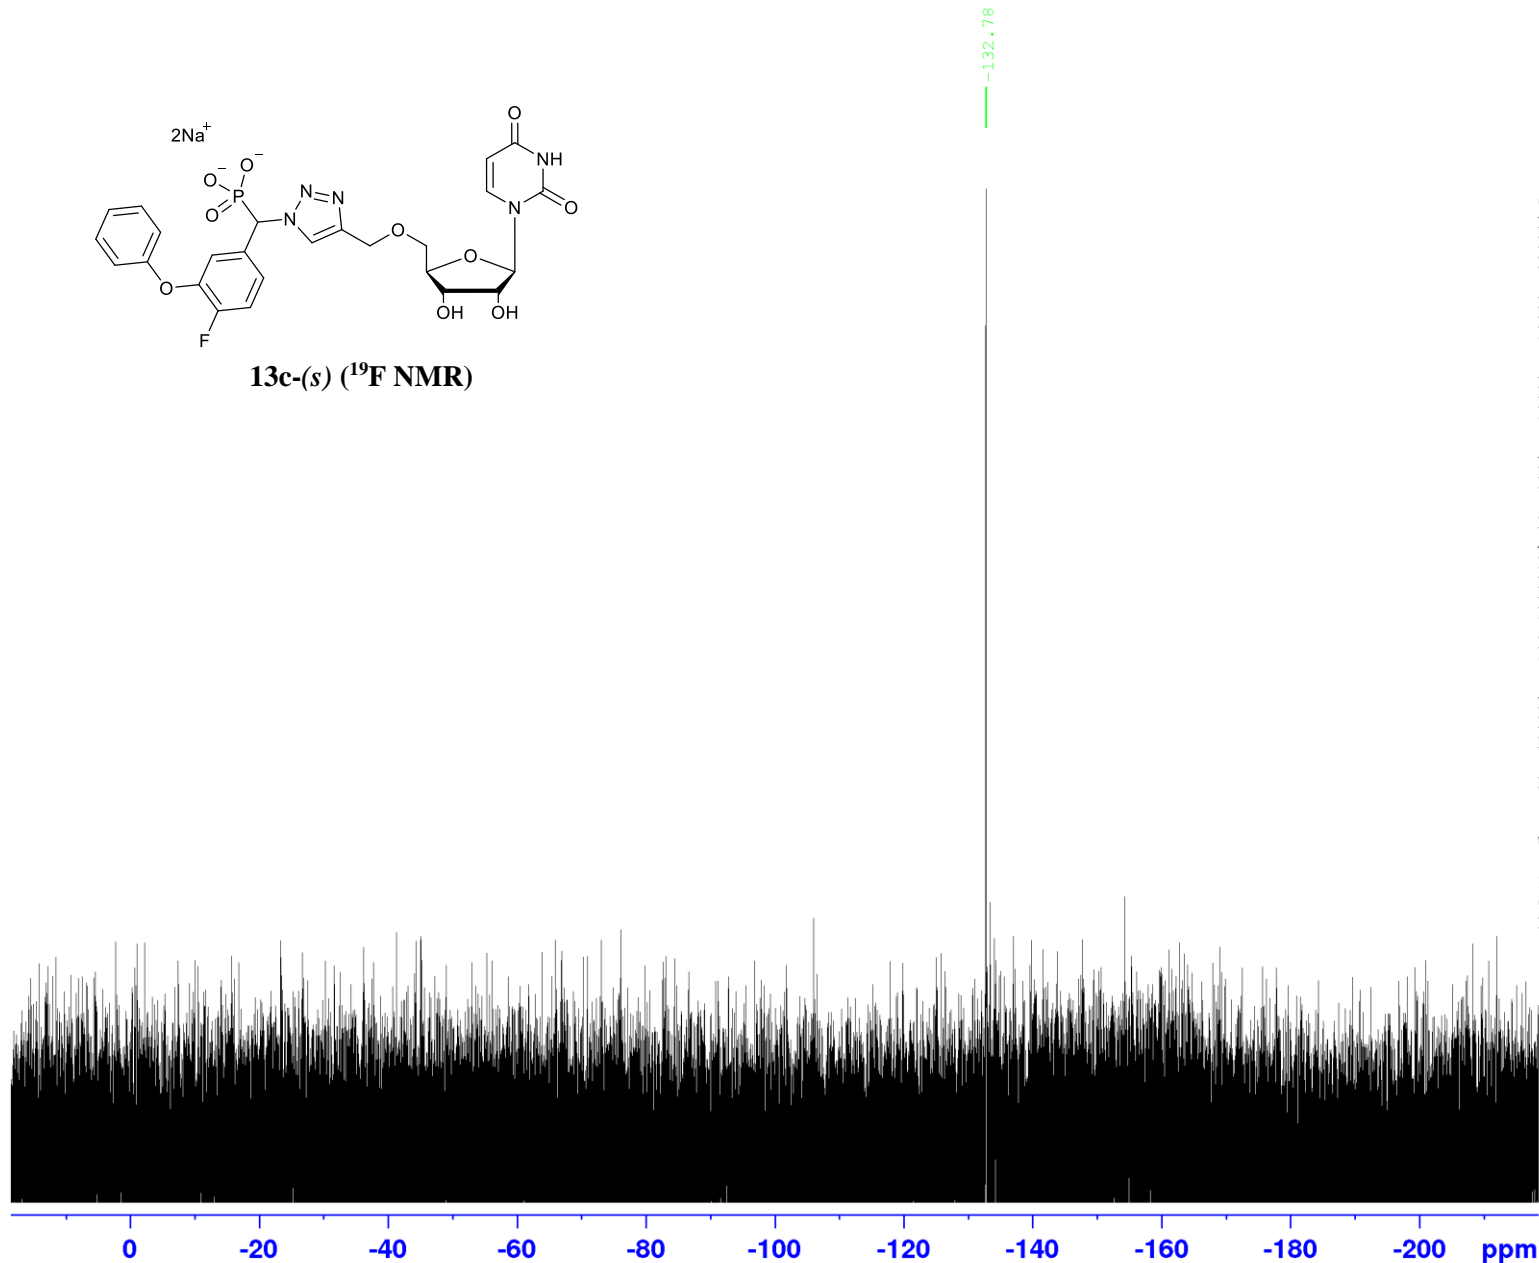

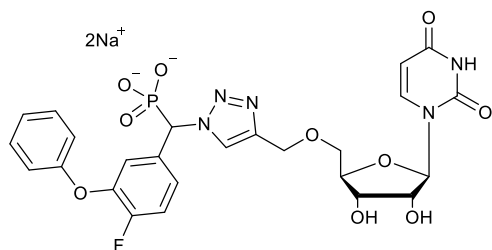

**13c-(I) ( $^1\text{H}$  NMR)**

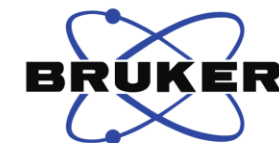

Current Data Parameters  
NAME CD67\_1  
EXPNO 5  
PROCNO 1

F2 - Acquisition Parameters  
Date\_ 20181011  
Time 19.52 h  
INSTRUM CAB AV4 500 MHz BASIC  
PROBHD Z150364\_0005 (  
PULPROG zg30  
TD 65536  
SOLVENT D2O  
NS 16  
DS 2  
SWH 10000.000 Hz  
FIDRES 0.305176 Hz  
AQ 3.2767999 sec  
RG 101  
DW 50.000 usec  
DE 16.23 usec  
TE 298.0 K  
D1 1.00000000 sec  
TD0 1  
SFO1 499.7470859 MHz  
NUC1 1H  
P1 12.00 usec  
PLW1 15.53100014 W

F2 - Processing parameters  
SI 65536  
SF 499.7440000 MHz  
WDW EM  
SSB 0  
LB 0.30 Hz  
GB 0  
PC 1.00

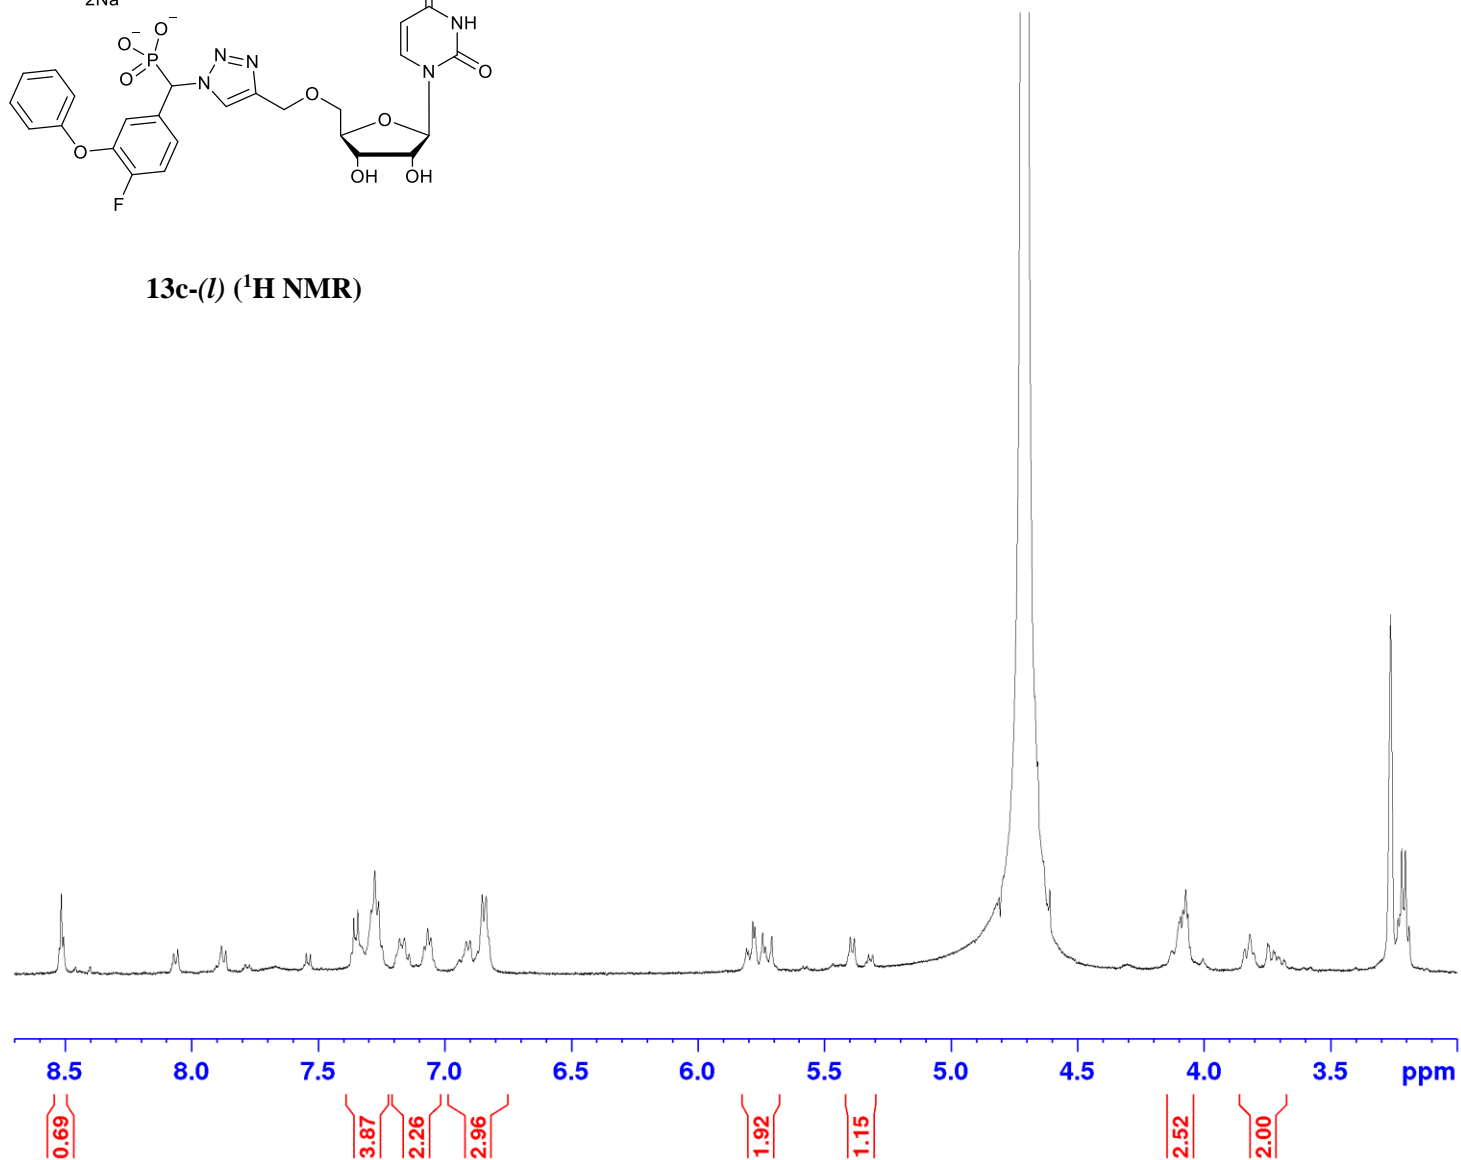

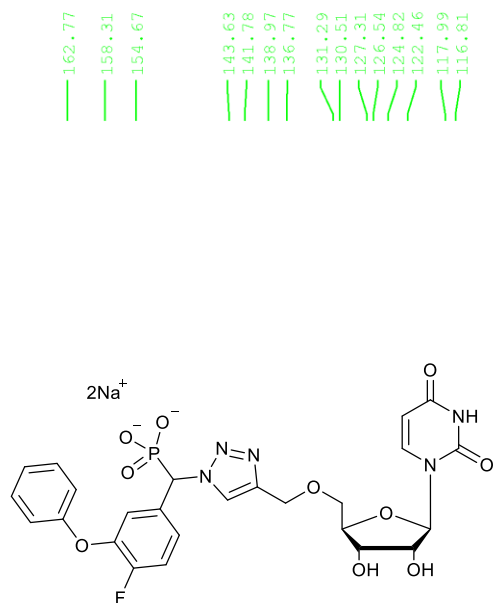

**13c-(I) (<sup>13</sup>C NMR)**

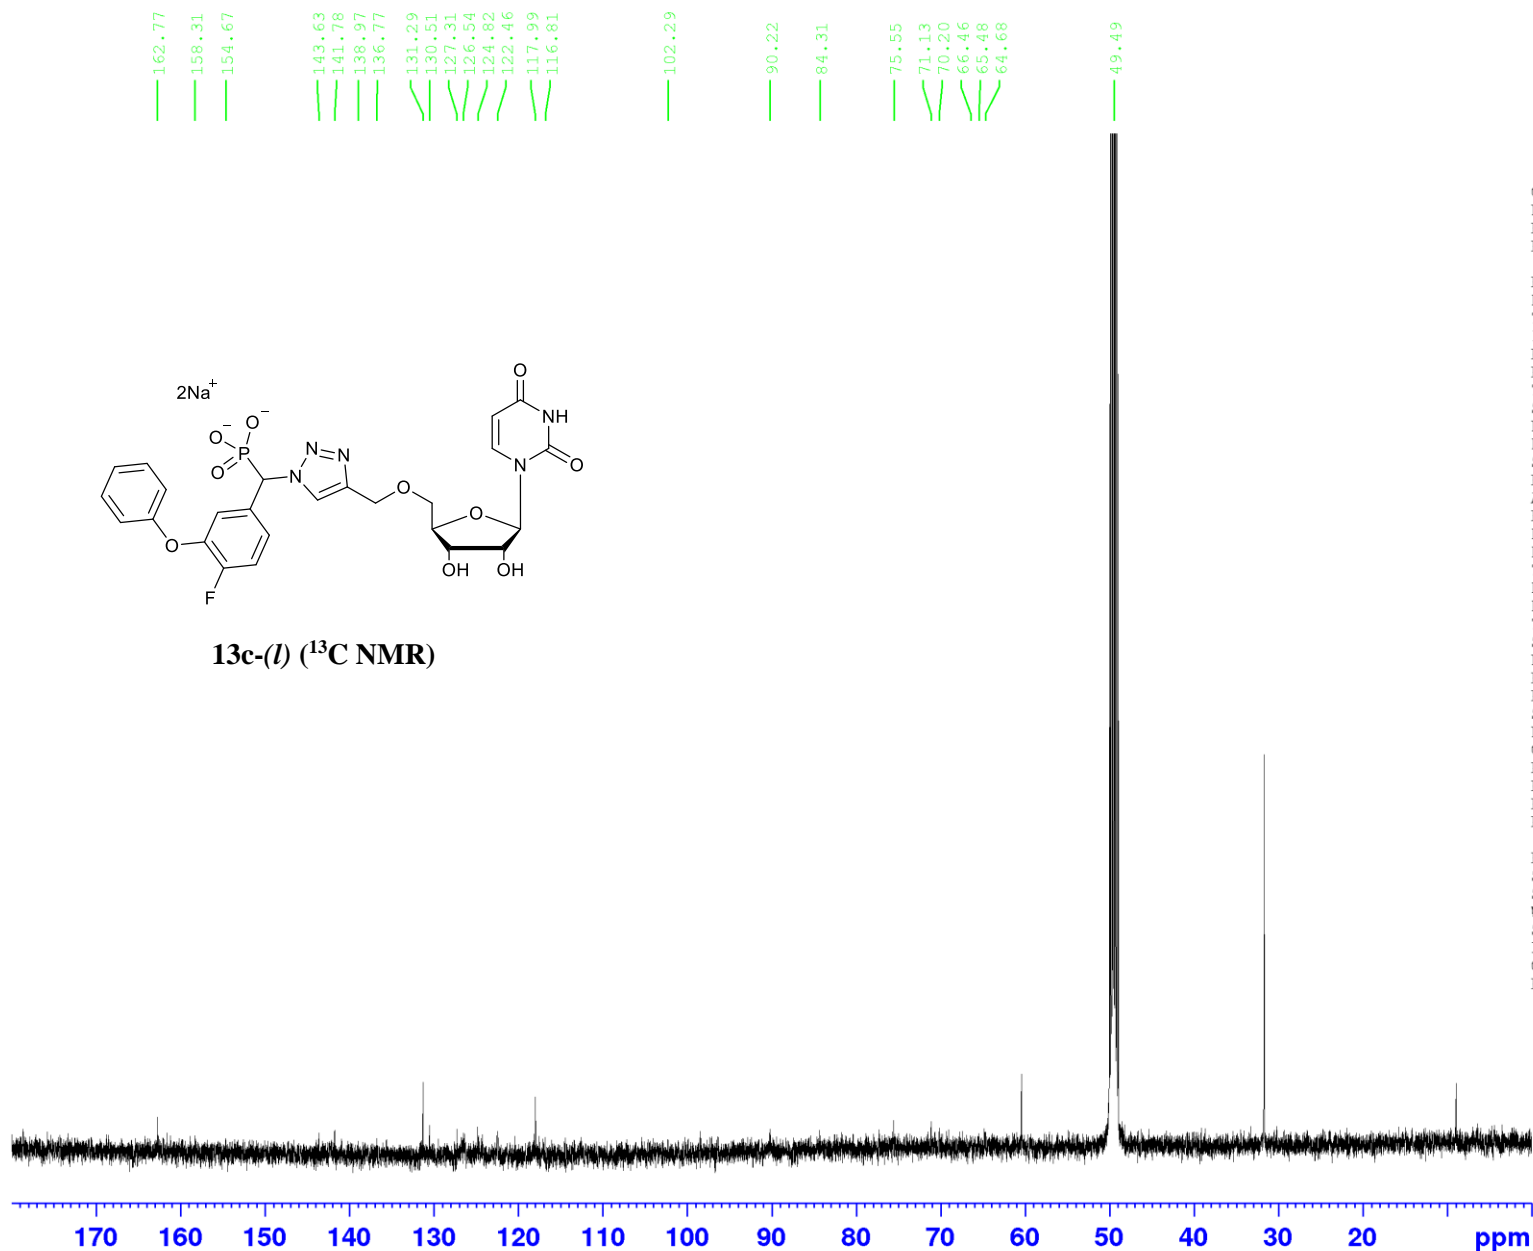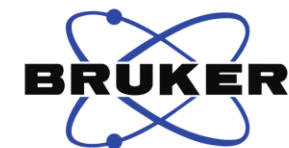

Current Data Parameters  
NAME CD67\_1  
EXPNO 4  
PROCNO 1

F2 - Acquisition Parameters  
Date\_ 20181011  
Time 19.49 h  
INSTRUM CAB AV4 500 MHZ BASIC  
PROBHD Z150364\_0005 (  
PULPROG zgpg30  
TD 65536  
SOLVENT D2O  
NS 2000  
DS 4  
SWH 30120.482 Hz  
FIDRES 0.919204 Hz  
AQ 1.0878977 sec  
RG 101  
DW 16.600 usec  
DE 18.00 usec  
TE 298.0 K  
D1 2.00000000 sec  
D11 0.03000000 sec  
TD0 1  
SF01 125.6732948 MHz  
NUC1 13C  
P1 10.00 usec  
PLW1 51.23600006 W  
SFO2 499.7459990 MHz  
NUC2 1H  
CPDPRG2 waltz16  
PCPD2 80.00 usec  
PLW2 15.53100014 W  
PLW12 0.34944999 W  
PLW13 0.17549001 W

F2 - Processing parameters  
SI 32768  
SF 125.6605531 MHz  
WDW EM  
SSB 0  
LB 1.00 Hz  
GB 0  
PC 1.40

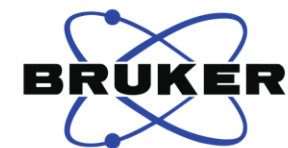

Current Data Parameters  
NAME CD67\_1  
EXPNO 10  
PROCNO 1

F2 - Acquisition Parameters  
Date\_ 20181011  
Time 21.53 h  
INSTRUM CAB AV4 500 MHZ BASIC  
PROBHD Z150364\_0005 (   
PULPROG zgpg30  
TD 65536  
SOLVENT D2O  
NS 16  
DS 4  
SWH 81967.211 Hz  
FIDRES 2.501441 Hz  
AQ 0.3997696 sec  
RG 101  
DW 6.100 usec  
DE 18.00 usec  
TE 298.0 K  
D1 2.00000000 sec  
D11 0.03000000 sec  
TD0 1  
SFO1 202.2899643 MHz  
NUC1 31P  
P1 12.00 usec  
PLW1 45.76100159 W  
SFO2 499.7459990 MHz  
NUC2 1H  
CPDPRG[2] waltz16  
PCPD2 80.00 usec  
PLW2 15.53100014 W  
PLW12 0.34944999 W  
PLW13 0.17549001 W

F2 - Processing parameters  
SI 32768  
SF 202.3000793 MHz  
WDW EM  
SSB 0  
LB 1.00 Hz  
GB 0  
PC 1.40

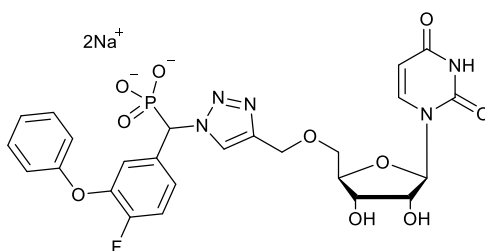

13c-(I) (<sup>31</sup>P NMR)

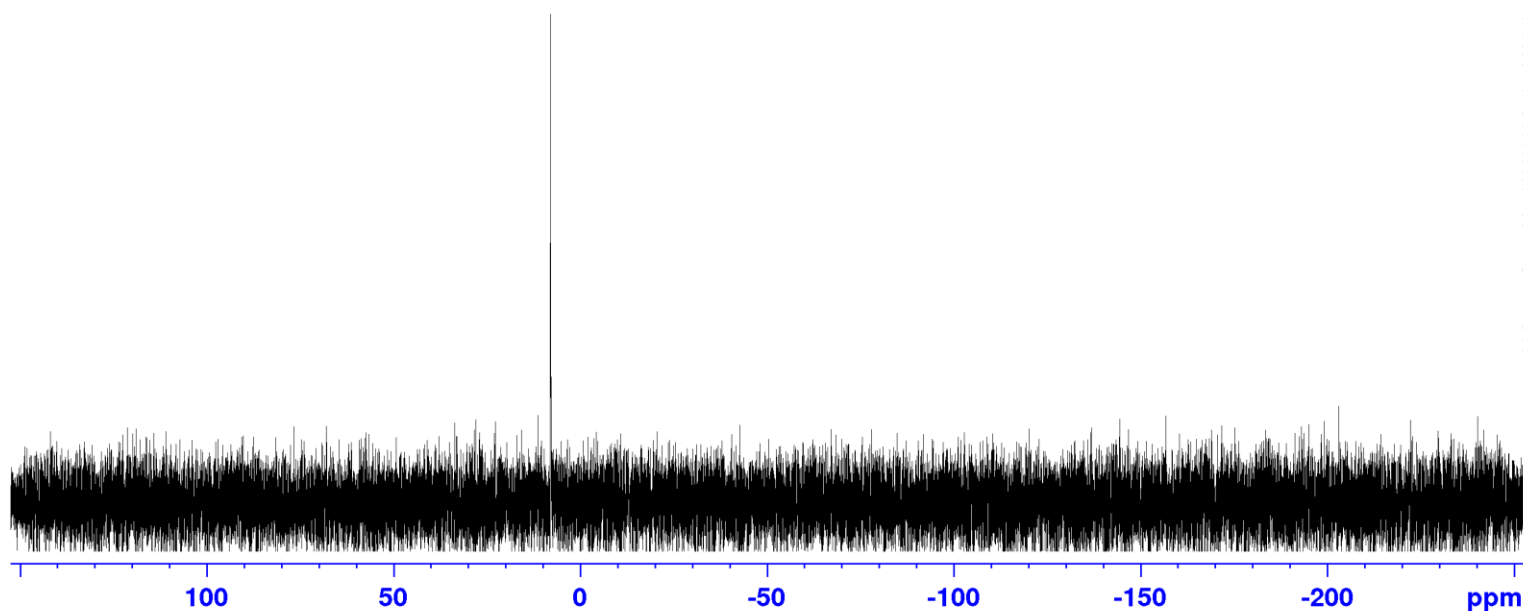

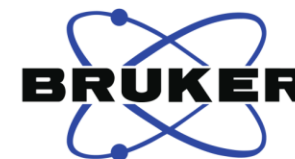

Current Data Parameters  
NAME CD104s  
EXPNO 1  
PROCNO 1

F2 - Acquisition Parameters  
Date\_ 20191219  
Time 13.50 h  
INSTRUM CAB AV4 500 MHZ BASIC  
PROBHD Z150364\_0005 (   
PULPROG zg30  
TD 65536  
SOLVENT D2O  
NS 16  
DS 2  
SWH 10000.000 Hz  
FIDRES 0.305176 Hz  
AQ 3.2767999 sec  
RG 101  
DW 50.000 usec  
DE 16.23 usec  
TE 298.0 K  
D1 1.00000000 sec  
TD0 1  
SFO1 499.7470859 MHz  
NUC1 1H  
P1 12.00 usec  
PLW1 15.53100014 W

F2 - Processing parameters  
SI 65536  
SF 499.7439590 MHz  
WDW EM  
SSB 0  
LB 0.30 Hz  
GB 0  
PC 1.00

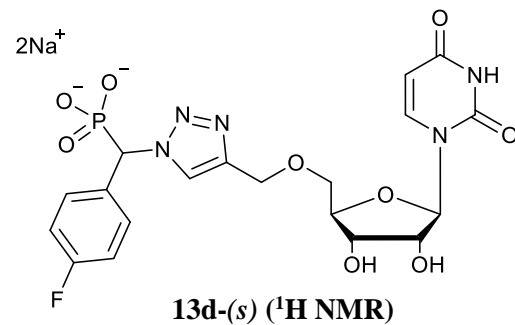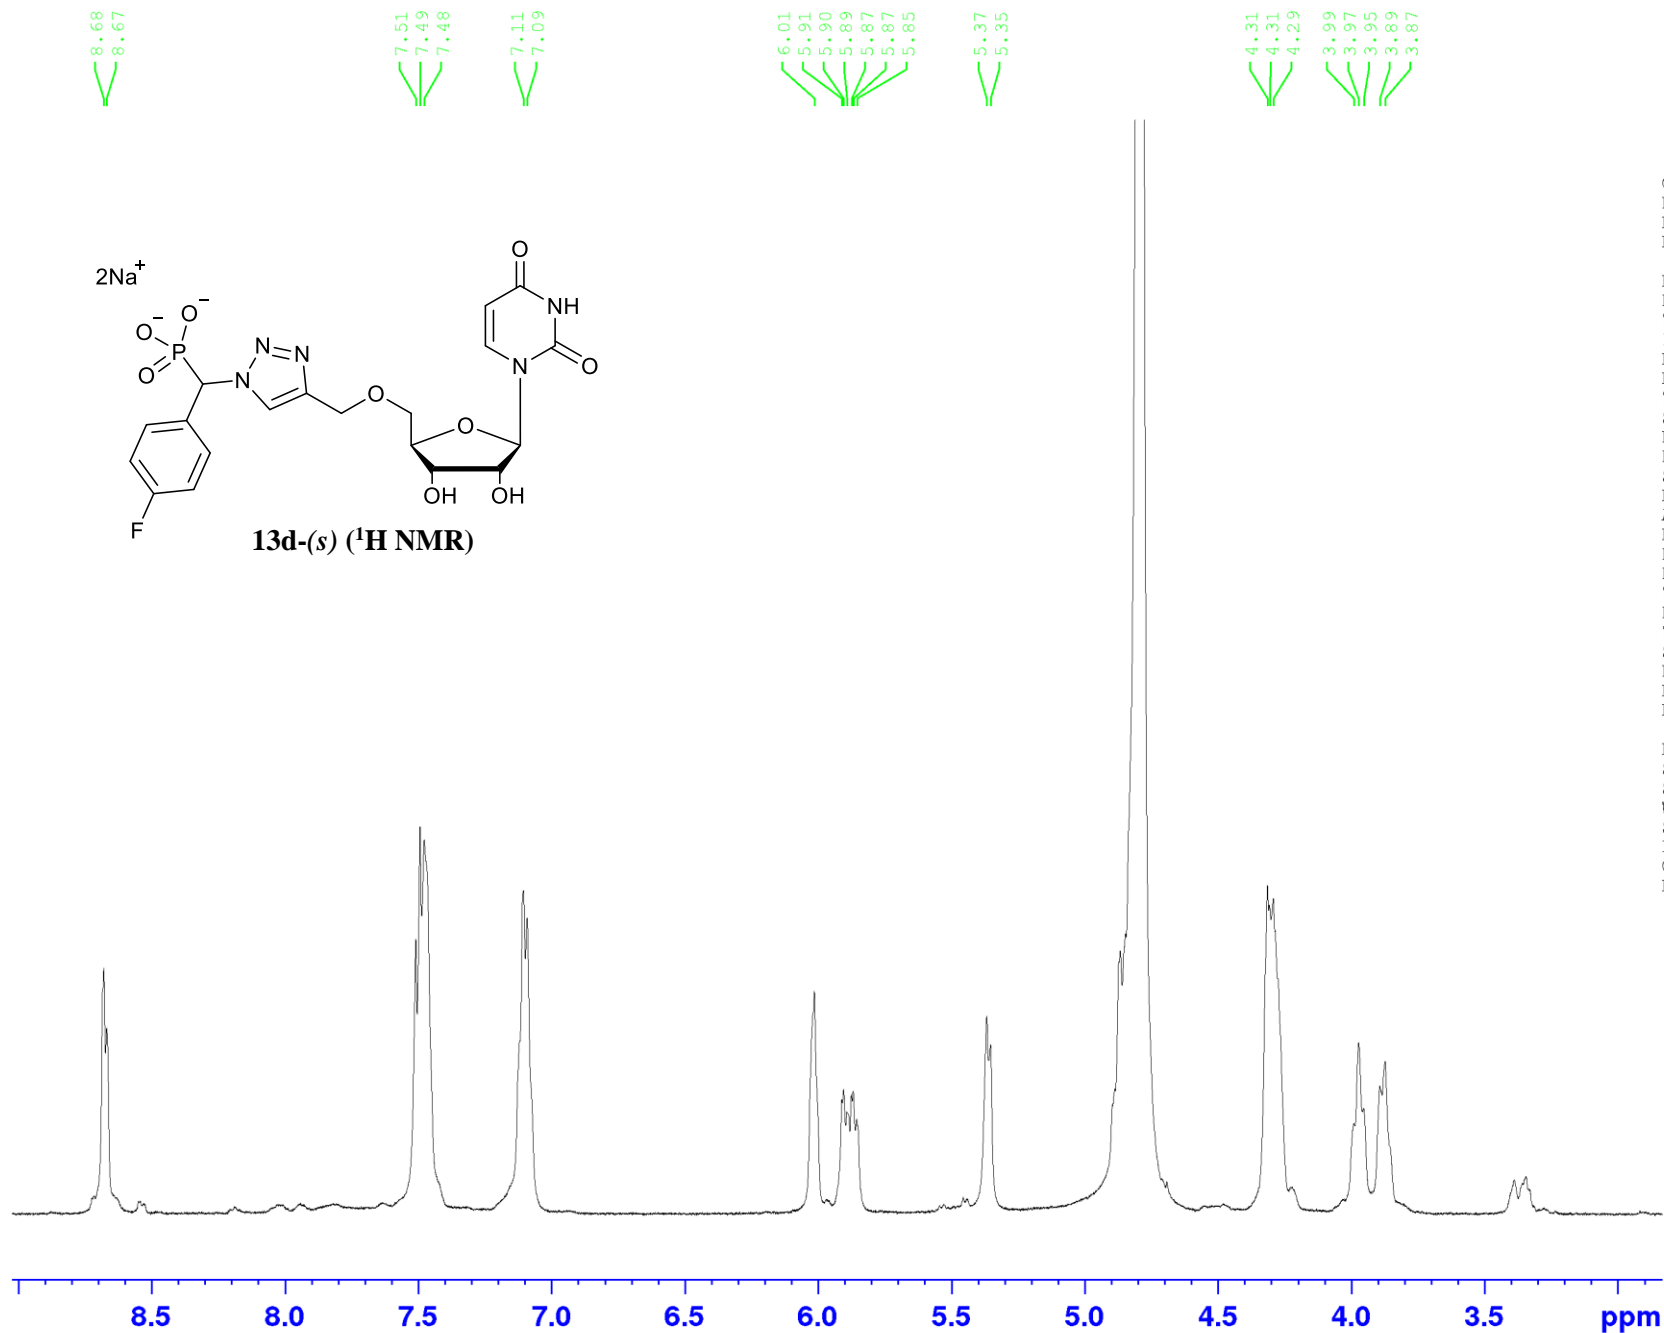

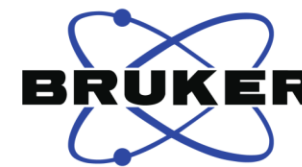

Current Data Parameters  
NAME CD104s  
EXPNO 3  
PROCNO 1

F2 - Acquisition Parameters  
Date\_ 20191220  
Time 5.58 h  
INSTRUM CAB AV4 500 MHZ BASIC  
PROBHD Z150364\_0005 ( )  
PULPROG zgpg30  
TD 65536  
SOLVENT D2O  
NS 3200  
DS 4  
SWH 30120.482 Hz  
FIDRES 0.919204 Hz  
AQ 1.0878977 sec  
RG 101  
DW 16.600 usec  
DE 18.00 usec  
TE 298.0 K  
D1 2.0000000 sec  
D11 0.0300000 sec  
TD0 1  
SFO1 125.6732948 MHz  
NUC1 13C  
P1 10.00 usec  
PLW1 51.23600006 W  
SFO2 499.7459990 MHz  
NUC2 1H  
CPDPRG[2] waltz16  
PCPD2 80.00 usec  
PLW2 15.53100014 W  
PLW12 0.34944999 W  
PLW13 0.17549001 W

F2 - Processing parameters  
SI 32768  
SF 125.6605690 MHz  
WDW EM  
SSB 0  
LB 1.00 Hz  
GB 0  
PC 1.40

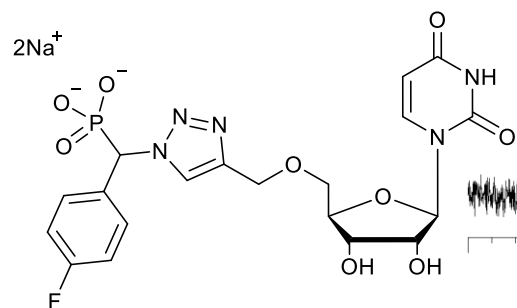

13d-(s) (<sup>13</sup>C NMR)

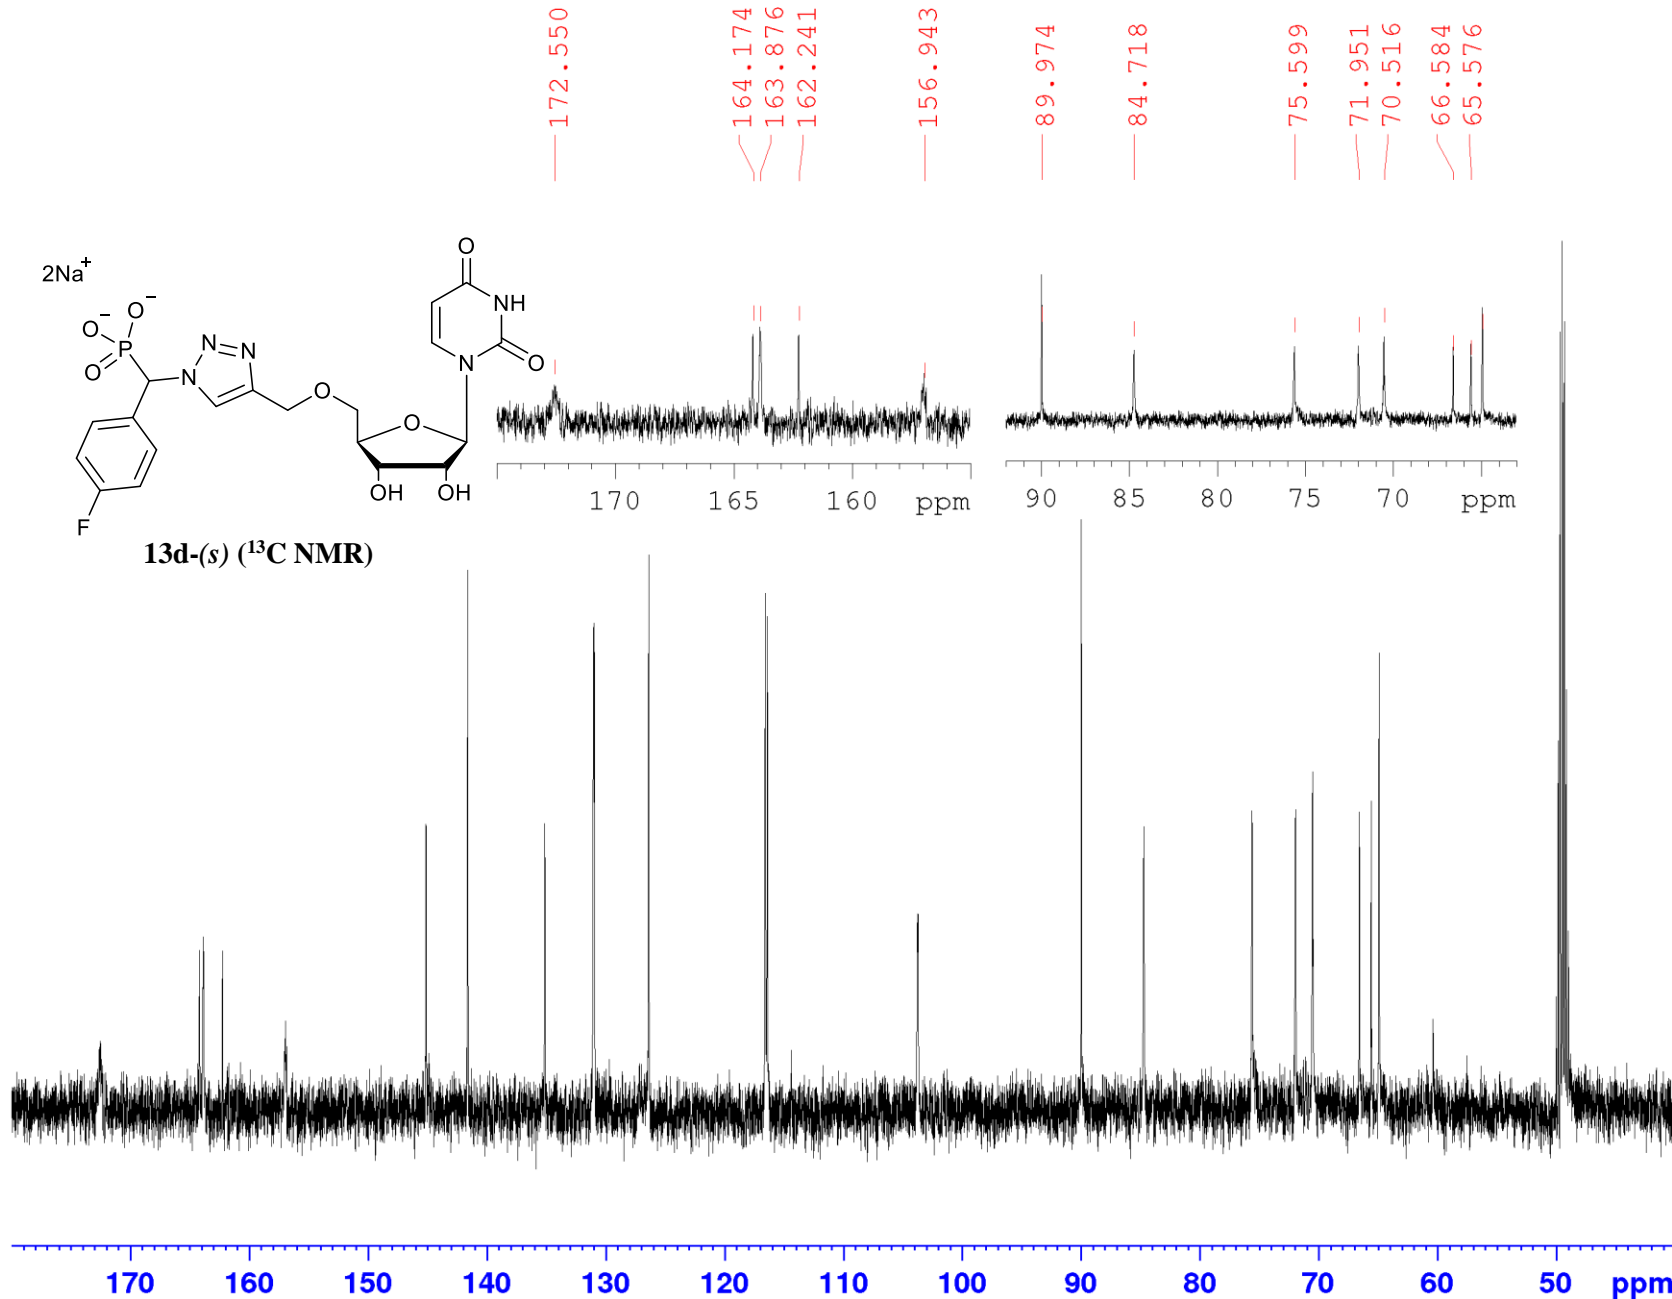

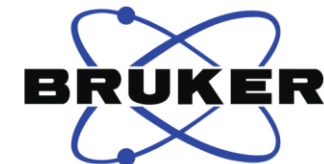

Current Data Parameters  
NAME CD104s  
EXPNO 5  
PROCNO 1

F2 - Acquisition Parameters  
Date\_ 20191220  
Time 6.23 h  
INSTRUM CAB AV4 500 MHZ BASIC  
PROBHD Z150364\_0005 (zggg30)  
PULPROG 65536  
TD 65536  
SOLVENT D2O  
NS 16  
DS 4  
SWH 81967.211 Hz  
FIDRES 2.501441 Hz  
AQ 0.3997696 sec  
RG 101  
DW 6.100 usec  
DE 18.00 usec  
TE 298.0 K  
D1 2.00000000 sec  
D11 0.03000000 sec  
TD0 1  
SFO1 202.2899643 MHz  
NUC1 31P  
P1 12.00 usec  
PLW1 45.76100159 W  
SFO2 499.7459990 MHz  
NUC2 1H  
CPDPRG[2] waltz16  
PCPD2 80.00 usec  
PLW2 15.53100014 W  
PLW12 0.34944999 W  
PLW13 0.17549001 W

F2 - Processing parameters  
SI 32768  
SF 202.3000793 MHz  
WDW EM  
SSB 0  
LB 1.00 Hz  
GB 0  
PC 1.40

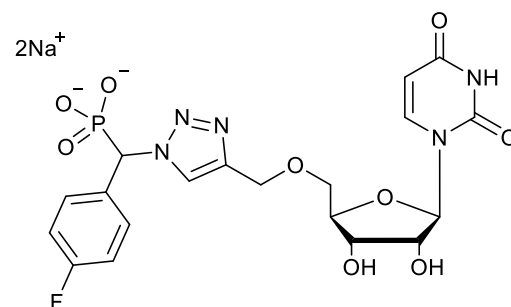

13d-(s) (<sup>31</sup>P NMR)

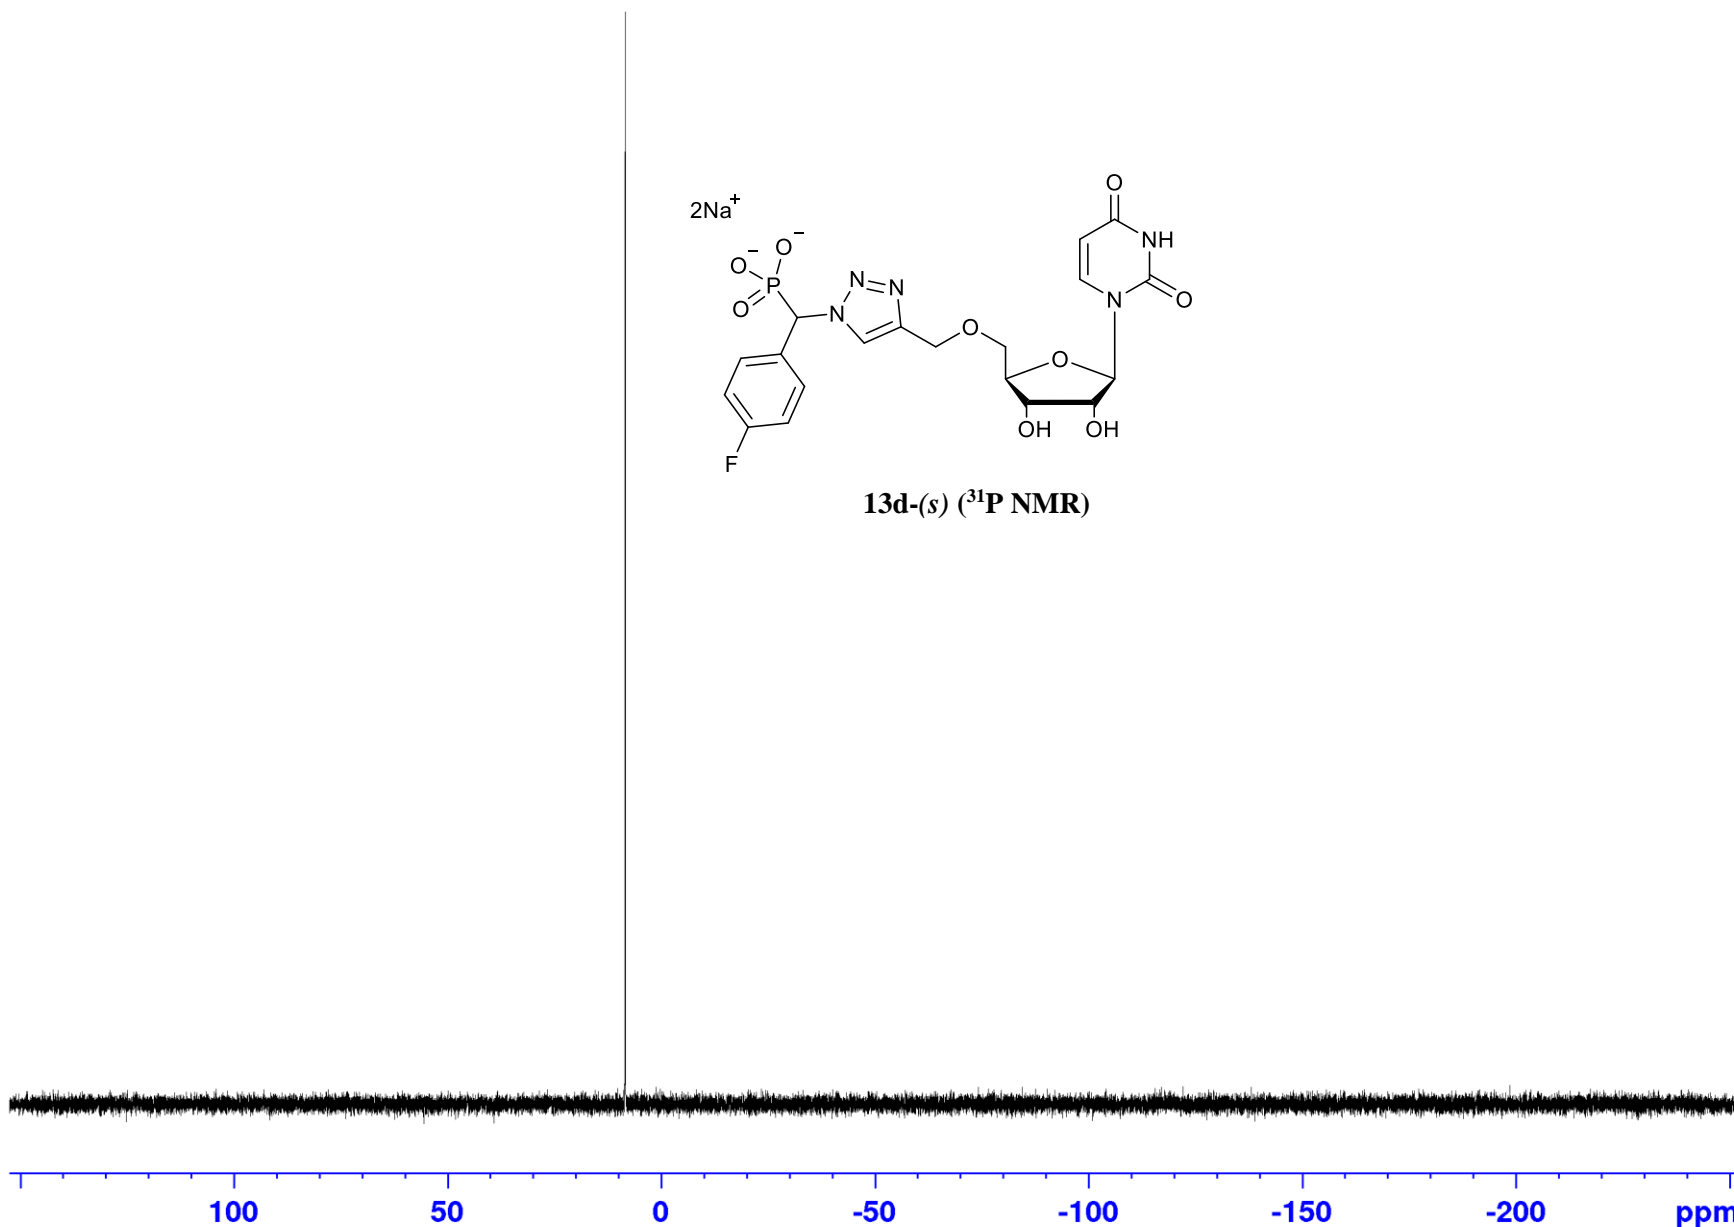

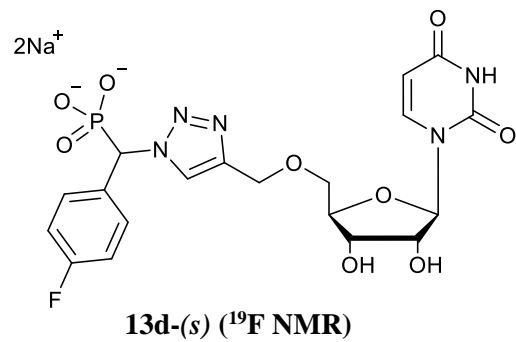

$\sim 112.84$   
 $\sim 112.85$

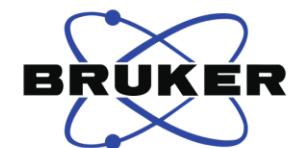

Current Data Parameters  
 NAME 19F  
 EXPNO 1  
 PROCNO 1

F2 - Acquisition Parameters  
 Date\_ 20200303  
 Time 14.25 h  
 INSTRUM spect  
 PROBHD Z108618\_0921 (  
 PULPROG zgflqn  
 TD 65536  
 SOLVENT CDC13  
 NS 8  
 DS 0  
 SWH 89285.711 Hz  
 FIDRES 2.724784 Hz  
 AQ 0.3670016 sec  
 RG 196.38  
 DW 5.600 usec  
 DE 120.00 usec  
 TE 299.2 K  
 D1 1.00000000 sec  
 TD0 1  
 SFO1 376.4889413 MHz  
 NUC1 19F  
 P1 15.00 usec  
 PLW1 17.75399971 W

F2 - Processing parameters  
 SI 65536  
 SF 376.5265940 MHz  
 WDW EM  
 SSB 0  
 LB 0.30 Hz  
 GB 0  
 PC 1.00

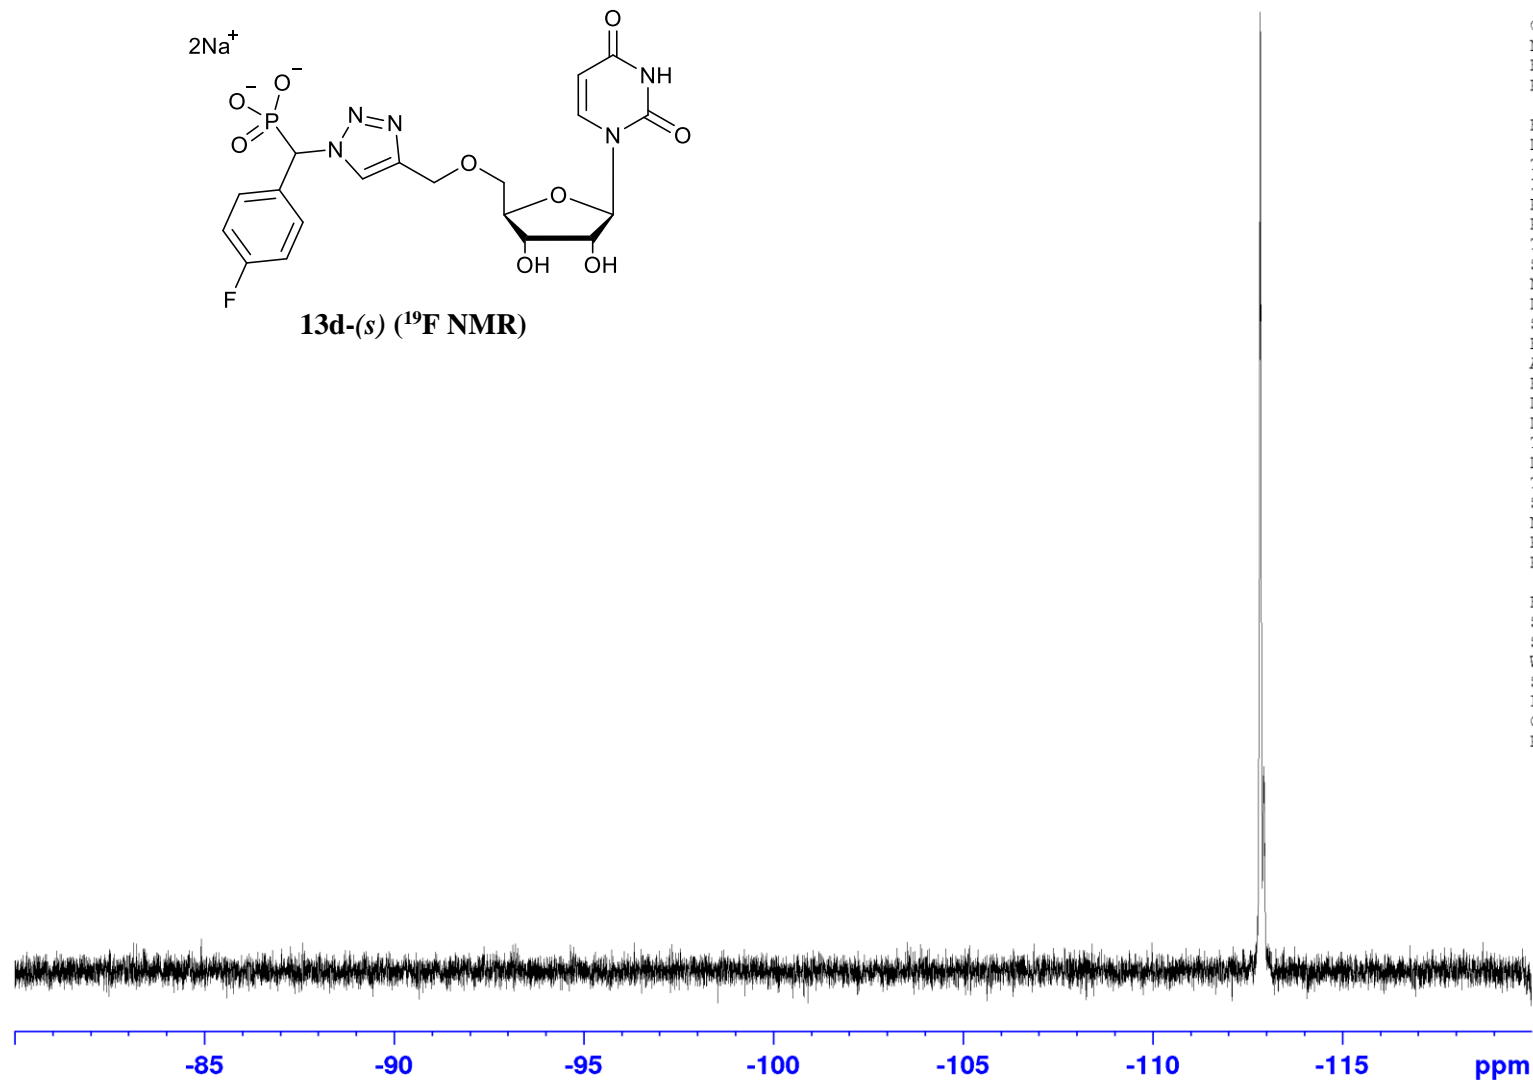

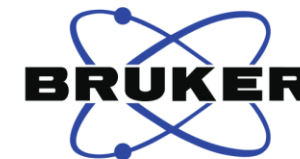

Current Data Parameters  
 NAME CD1041  
 EXPNO 1  
 PROCNO 1

F2 - Acquisition Parameters  
 Date\_ 20191219  
 Time 11.46 h  
 INSTRUM CAB AV4 500 MHZ BASIC  
 PROBHD Z150364\_0005 (   
 PULPROG zg30  
 TD 65536  
 SOLVENT D2O  
 NS 16  
 DS 2  
 SWH 10000.000 Hz  
 FIDRES 0.305176 Hz  
 AQ 3.2767999 sec  
 RG 92.3077  
 DW 50.000 usec  
 DE 16.23 usec  
 TE 298.0 K  
 D1 1.00000000 sec  
 TD0 1  
 SFO1 499.7470859 MHz  
 NUC1 1H  
 P1 12.00 usec  
 PLW1 15.53100014 W

F2 - Processing parameters  
 SI 65536  
 SF 499.7439587 MHz  
 WDW EM  
 SSB 0  
 LB 0.30 Hz  
 GB 0  
 PC 1.00

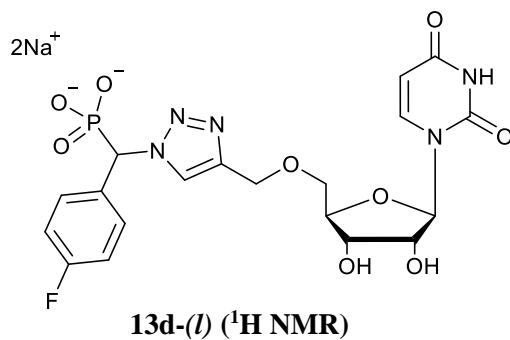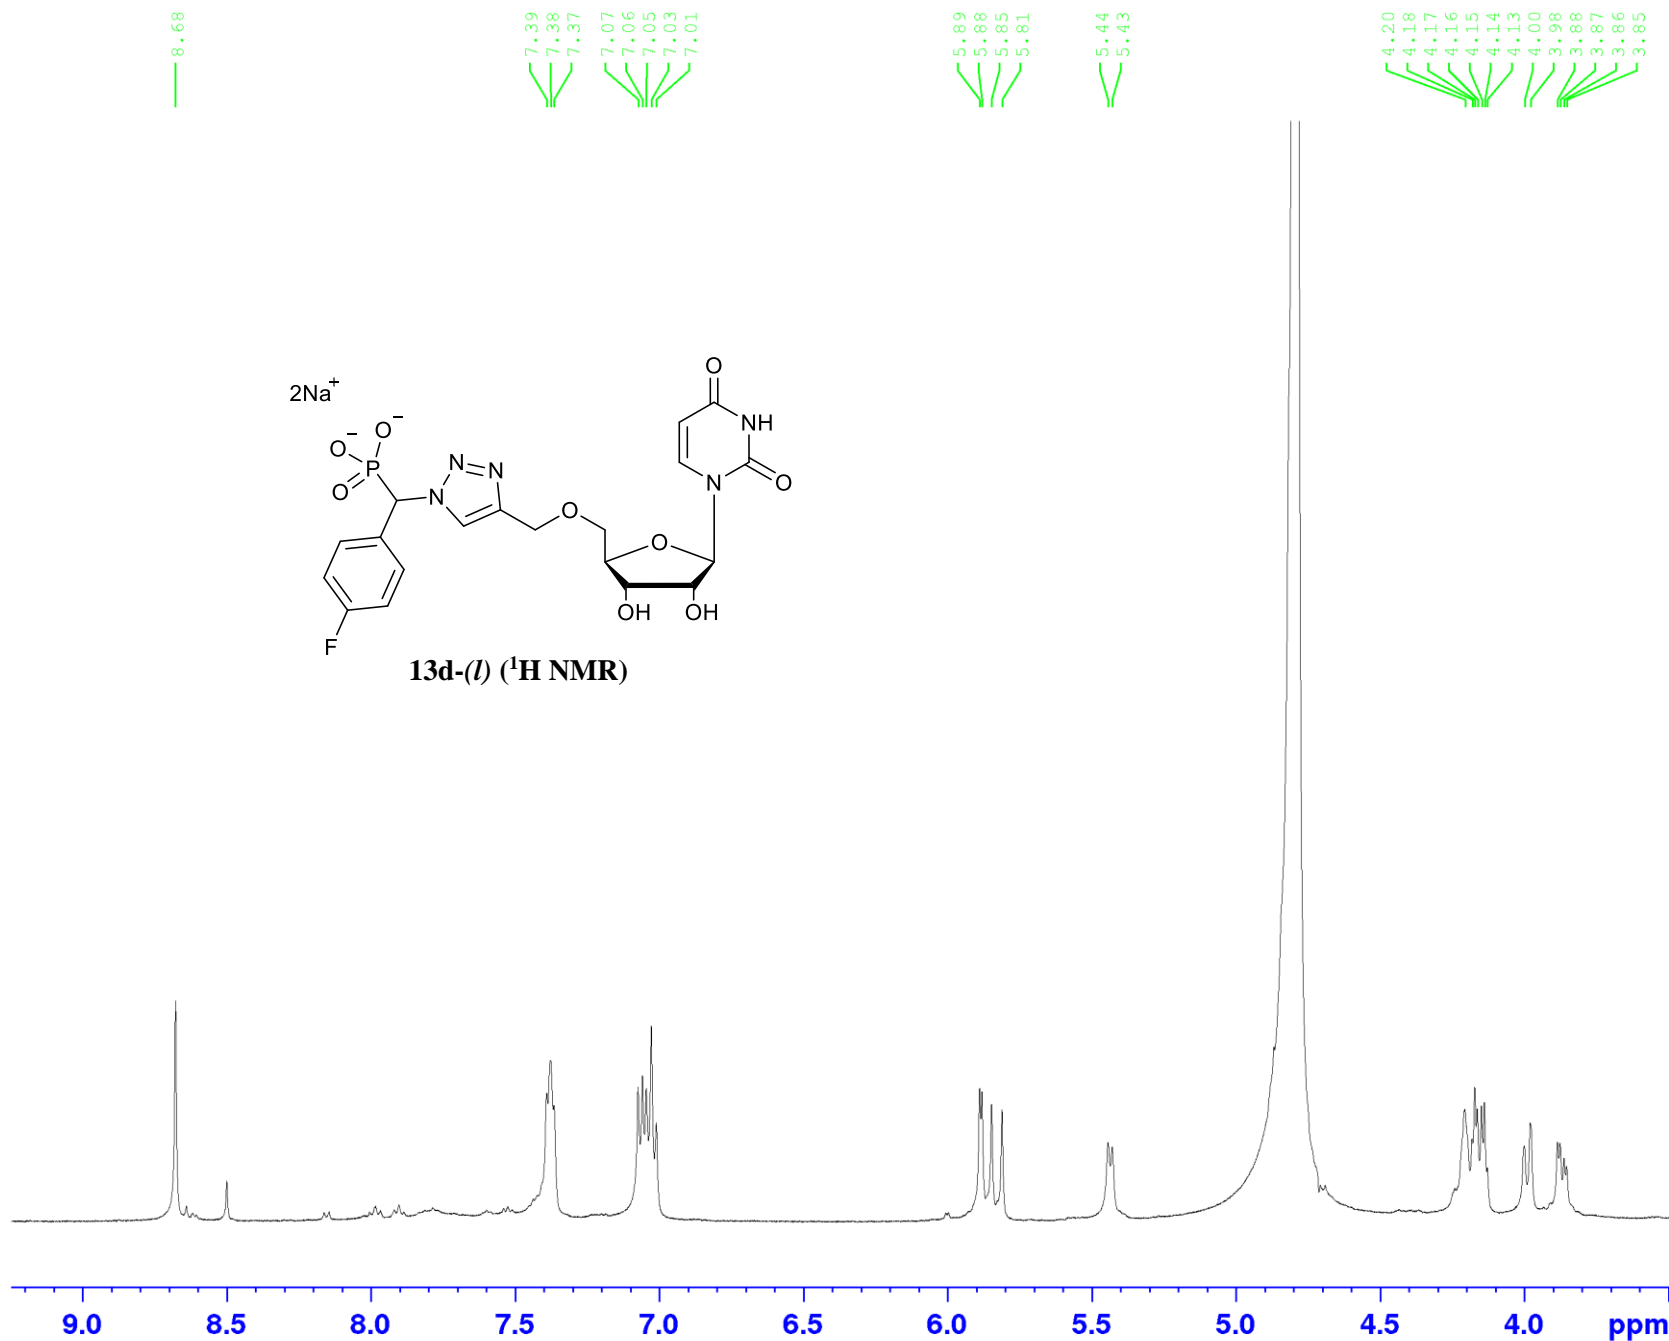

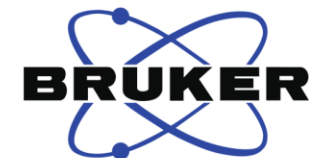

Current Data Parameters  
 NAME CD1041  
 EXPNO 3  
 PROCNO 1

F2 - Acquisition Parameters  
 Date\_ 20191220  
 Time 1.46 h  
 INSTRUM CAB AV4 500 MHZ BASIC  
 PROBHD Z150364\_0005 (   
 PULPROG zgpg30  
 TD 65536  
 SOLVENT D2O  
 NS 3000  
 DS 4  
 SWH 30120.482 Hz  
 FIDRES 0.919204 Hz  
 AQ 1.0878977 sec  
 RG 101  
 DW 16.600 usec  
 DE 18.00 usec  
 TE 298.0 K  
 D1 2.00000000 sec  
 D11 0.03000000 sec  
 TD0 1  
 SFO1 125.6732948 MHz  
 NUC1 13C  
 P1 10.00 usec  
 PLW1 51.23600006 W  
 SFO2 499.7459990 MHz  
 NUC2 1H  
 CPDPRG2 waltz16  
 PCPD2 80.00 usec  
 PLW2 15.53100014 W  
 PLW12 0.34944999 W  
 PLW13 0.17549001 W

F2 - Processing parameters  
 SI 32768  
 SF 125.6605569 MHz  
 WDW EM  
 SSB 0  
 LB 1.00 Hz  
 GB 0  
 PC 1.40

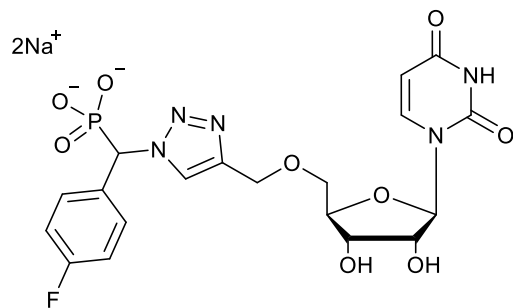

**13d-(I) (<sup>13</sup>C NMR)**

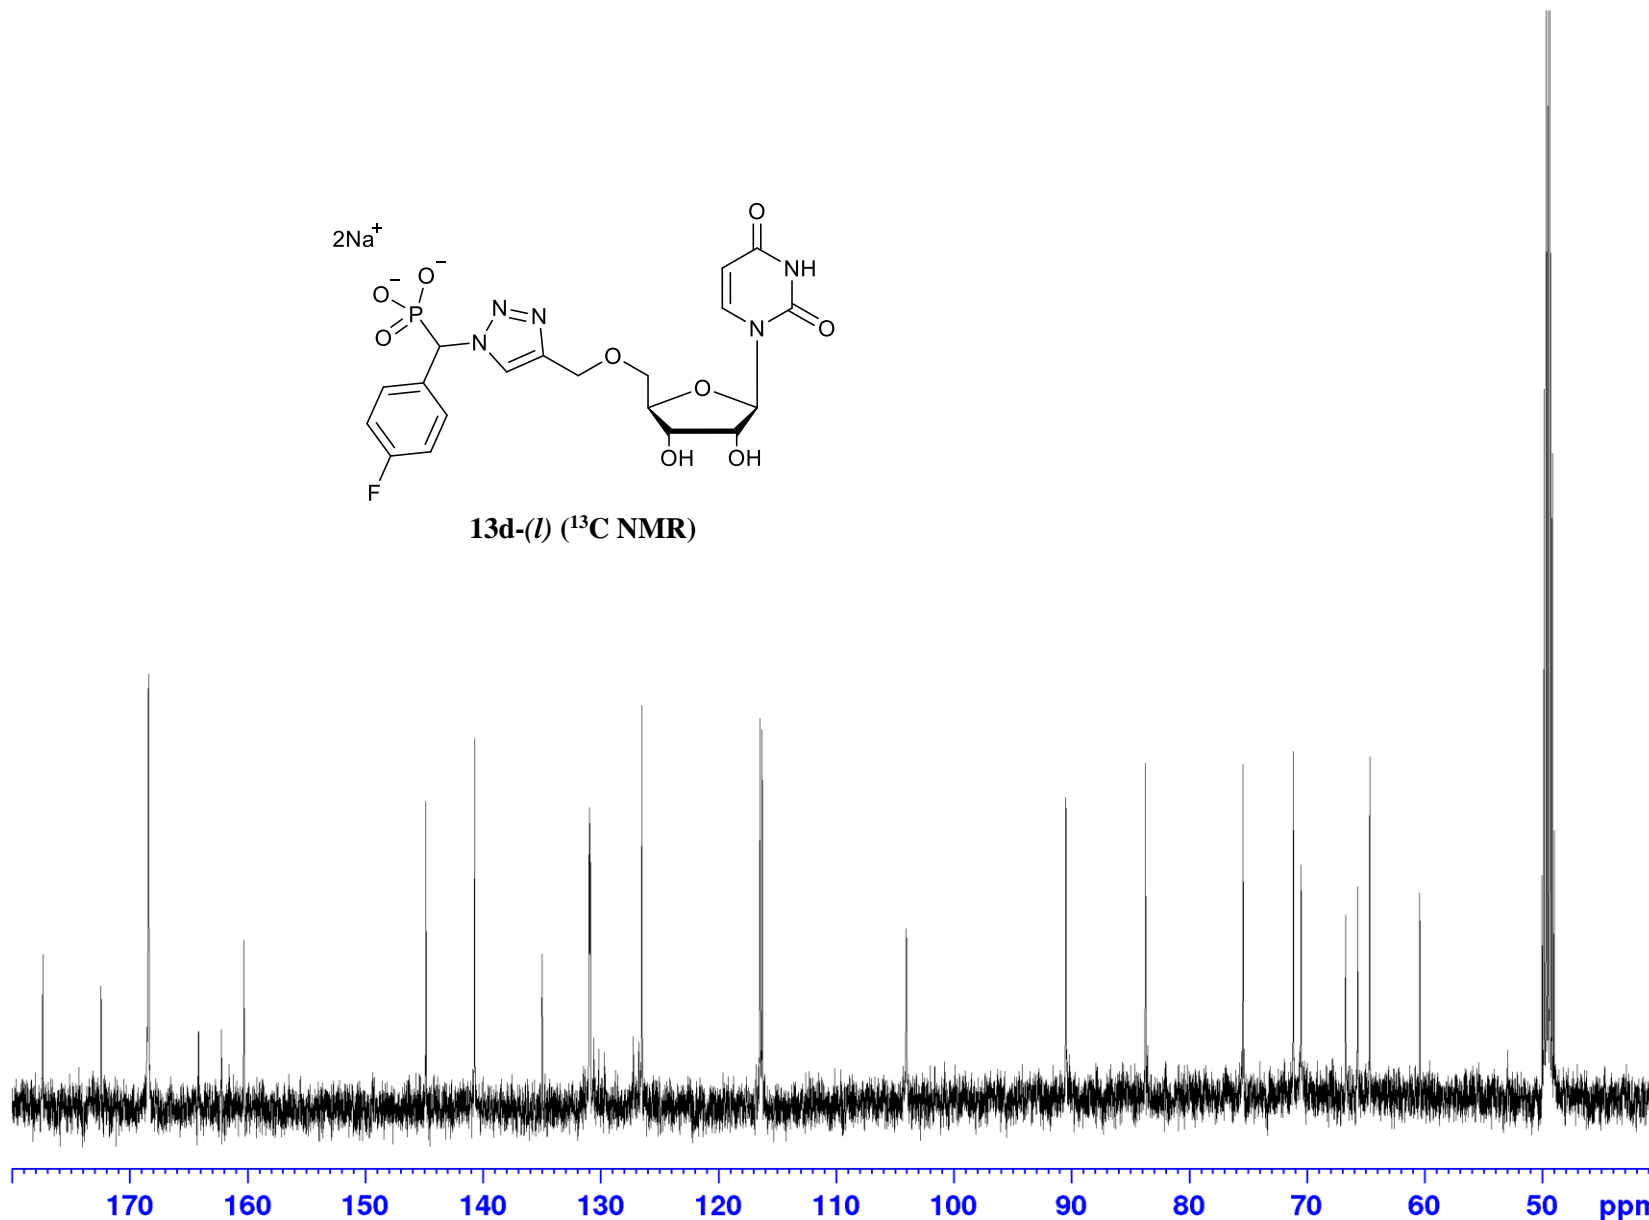

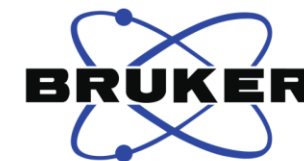

Current Data Parameters  
NAME CD1041  
EXPNO 5  
PROCNO 1

F2 - Acquisition Parameters  
Date\_ 20191220  
Time 2.18 h  
INSTRUM CAB AV4 500 MHZ BASIC  
PROBHD Z150364\_0005 (  
PULPROG zgpg30  
TD 65536  
SOLVENT D2O  
NS 16  
DS 4  
SWH 81967.211 Hz  
FIDRES 2.501441 Hz  
AQ 0.3997696 sec  
RG 101  
DW 6.100 usec  
DE 18.00 usec  
TE 298.0 K  
D1 2.00000000 sec  
D11 0.03000000 sec  
TD0 1  
SFO1 202.2899643 MHz  
NUC1 31P  
P1 12.00 usec  
PLW1 45.76100159 W  
SFO2 499.7459990 MHz  
NUC2 1H  
CPDPRG[2] waltz16  
PCPD2 80.00 usec  
PLW2 15.53100014 W  
PLW12 0.34944999 W  
PLW13 0.17549001 W

F2 - Processing parameters  
SI 32768  
SF 202.3000793 MHz  
WDW EM  
SSB 0  
LB 1.00 Hz  
GB 0  
PC 1.40

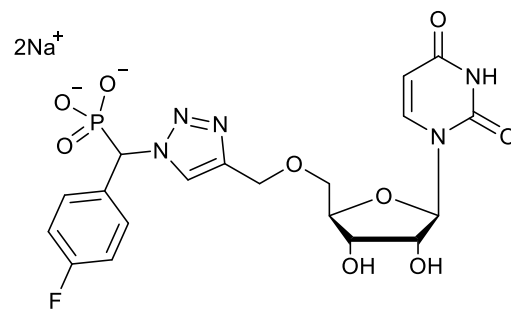

**13d-(I) (<sup>31</sup>P NMR)**

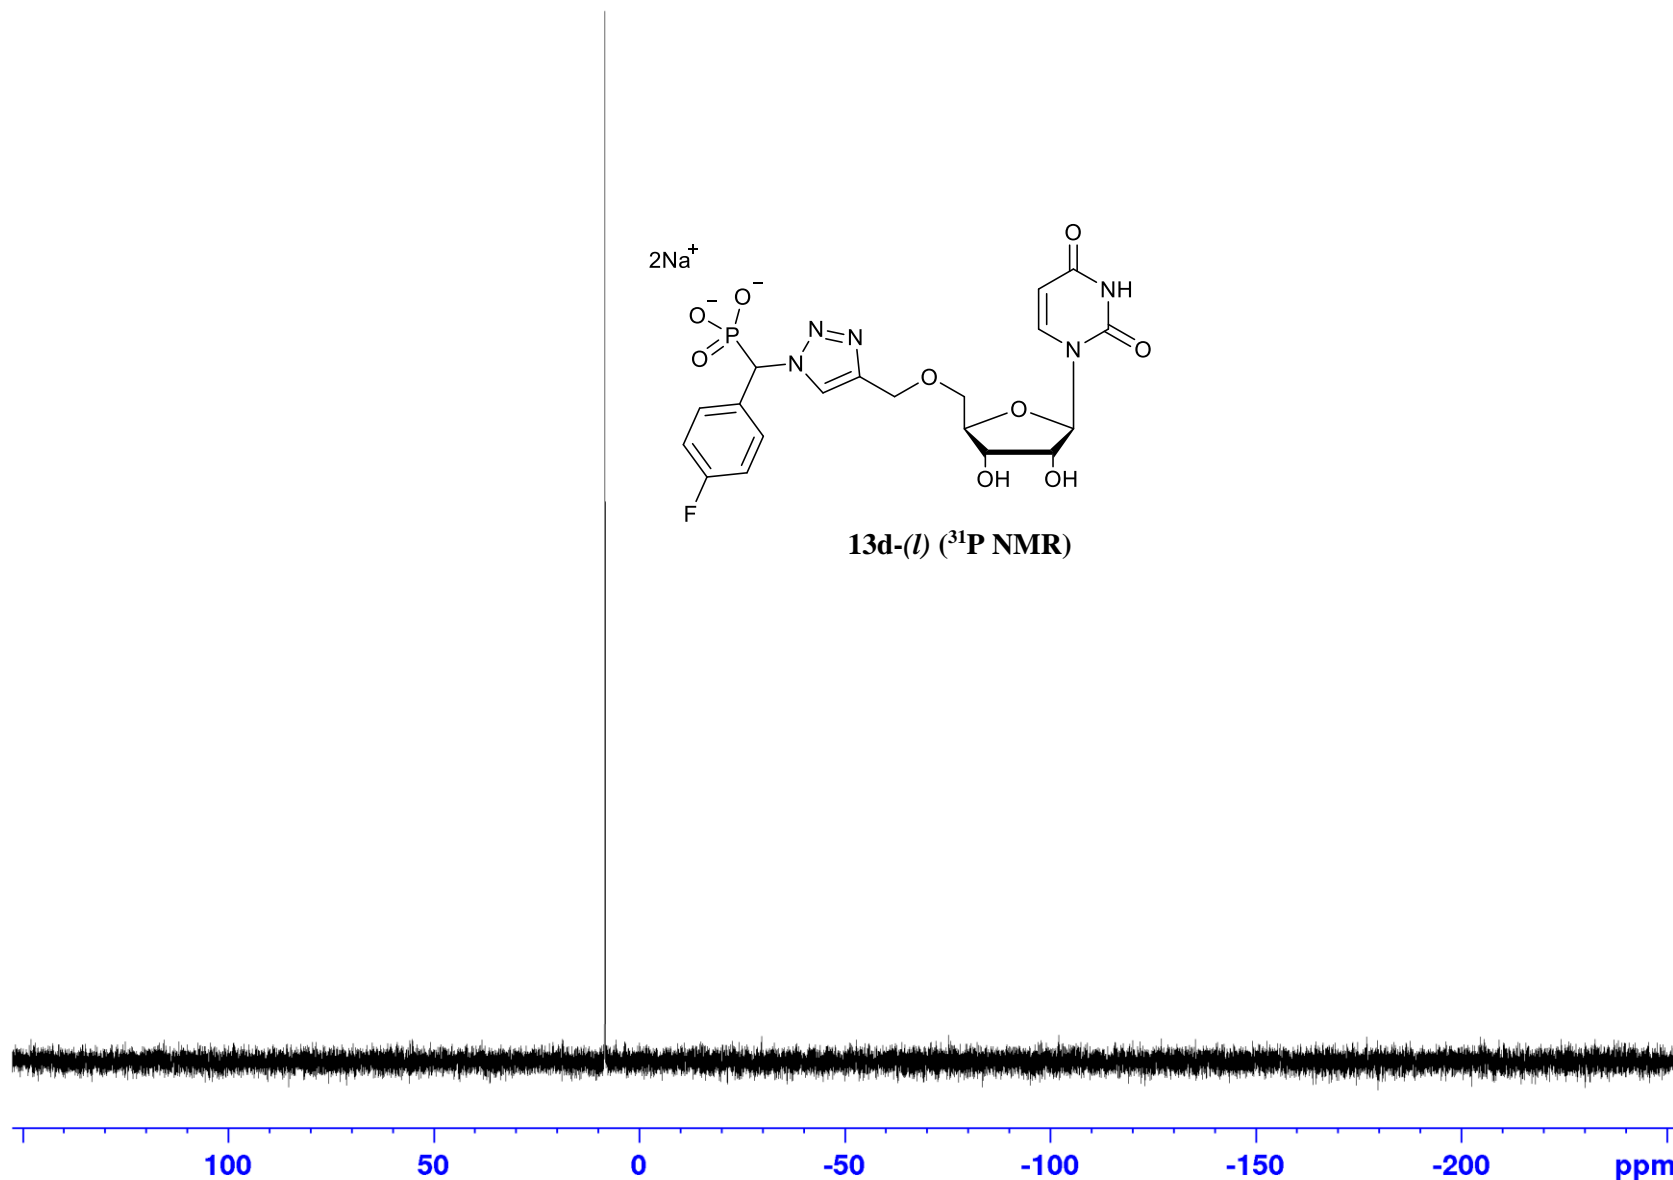

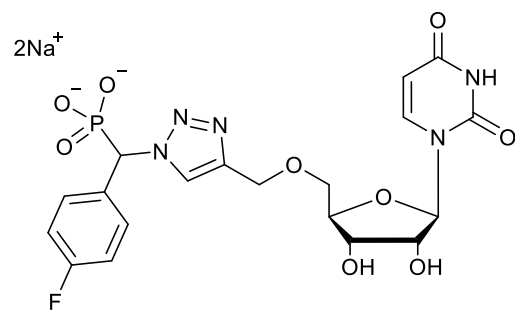

**13d-(l) ( $^{19}\text{F}$  NMR)**

-115.43  
-115.45

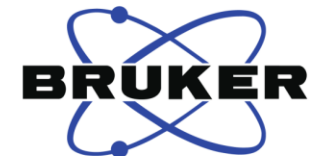

Current Data Parameters  
NAME CD1041  
EXPNO 6  
PROCNO 1

F2 - Acquisition Parameters  
Date\_ 20191220  
Time 2.21 h  
INSTRUM CAB AV4 500 MHZ BASIC  
PROBHD Z150364\_0005 ( )  
PULPROG zg  
TD 131072  
SOLVENT D2O  
NS 16  
DS 4  
SWH 113636.367 Hz  
FIDRES 1.733953 Hz  
AQ 0.5767168 sec  
RG 101  
DW 4.400 usec  
DE 180.00 usec  
TE 298.0 K  
D1 1.00000000 sec  
TD0 1  
SFO1 470.1821514 MHz  
NUC1  $^{19}\text{F}$   
P1 15.00 usec  
PLW1 12.56499958 W

F2 - Processing parameters  
SI 65536  
SF 470.2291743 MHz  
WDW EM  
SSB 0  
LB 0.30 Hz  
GB 0  
PC 1.00

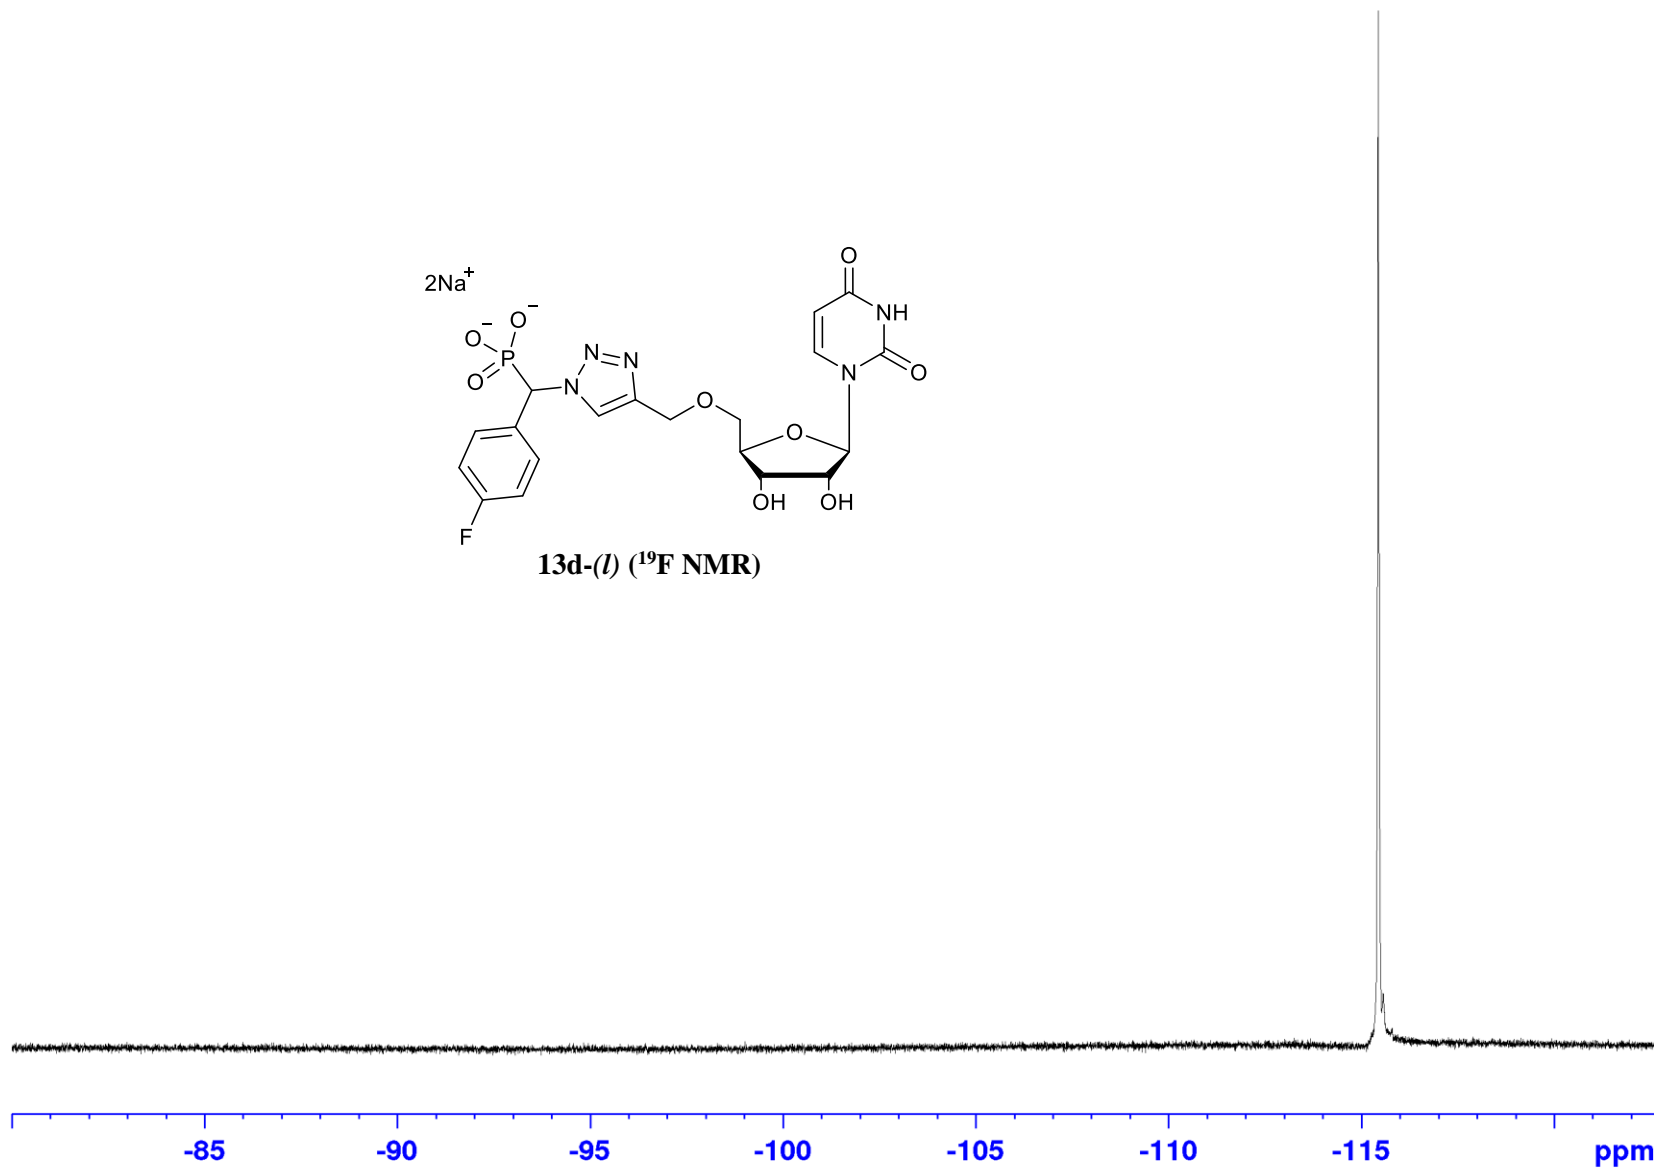

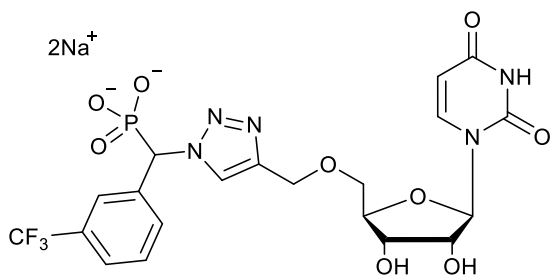

**13e-(s) (<sup>1</sup>H NMR)**

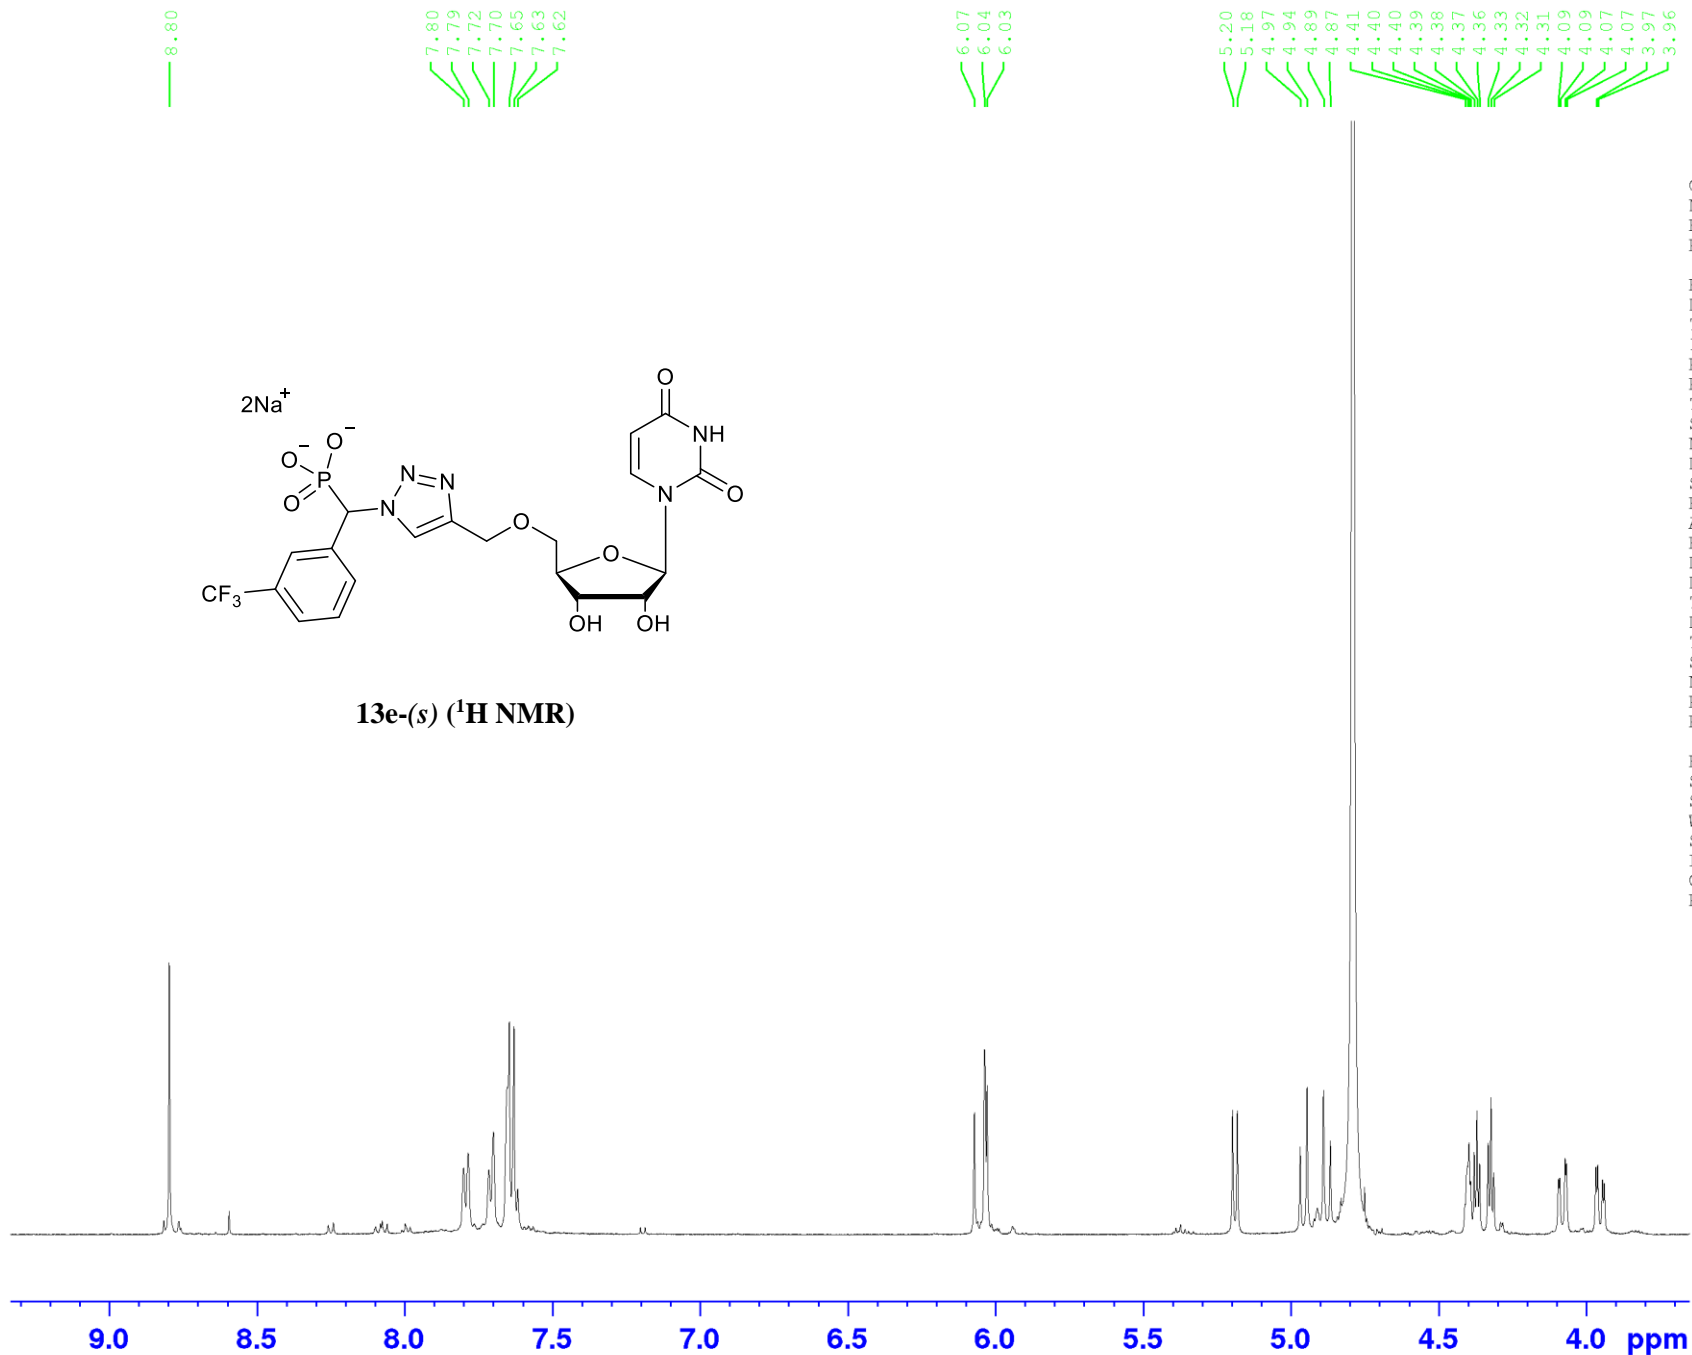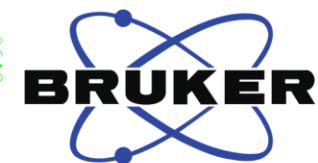

Current Data Parameters

NAME cd9\_191219\_8  
EXPNO 1  
PROCNO 1

F2 - Acquisition Parameters

Date\_ 20191219  
Time 12.40 h  
INSTRUM CAB AV4 500 MHZ BASIC  
PROBHD Z150364\_0005 (   
PULPROG zg30  
TD 65536  
SOLVENT D2O  
NS 32  
DS 2  
SWH 10000.000 Hz  
FIDRES 0.305176 Hz  
AQ 3.2767999 sec  
RG 101  
DW 50.000 usec  
DE 16.23 usec  
TE 298.0 K  
D1 1.00000000 sec  
TD0 1  
SFO1 499.7470859 MHz  
NUC1 1H  
P1 12.00 usec  
PLW1 15.53100014 W

F2 - Processing parameters

SI 65536  
SF 499.7439583 MHz  
WDW EM  
SSB 0  
LB 0.30 Hz  
GB 0  
PC 1.00

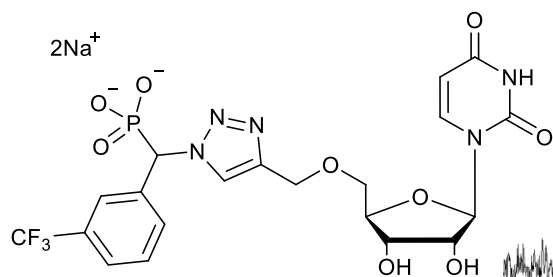

**13e-(s) (<sup>13</sup>C NMR)**

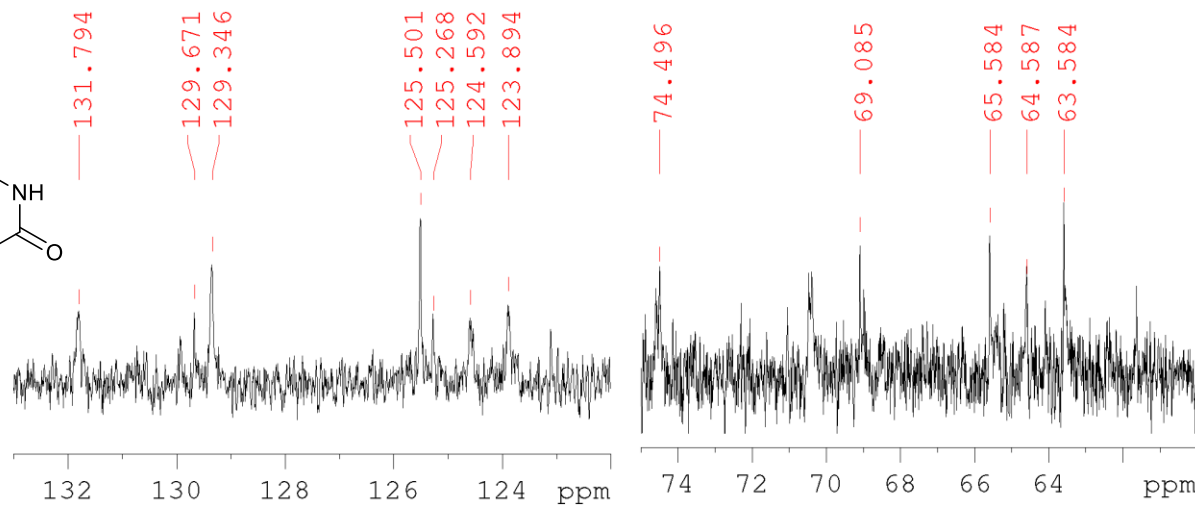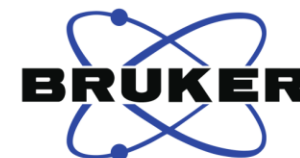

Current Data Parameters  
NAME cd9\_191219\_8  
EXPNO 2  
PROCNO 1

F2 - Acquisition Parameters  
Date\_ 20191219  
Time 13.34 h  
INSTRUM CAB AV4 500 MHZ BASIC  
PROBHD Z150364\_0005 ( )  
PULPROG zgpg30  
TD 65536  
SOLVENT D2O  
NS 1000  
DS 4  
SWH 30120.482 Hz  
FIDRES 0.919204 Hz  
AQ 1.0878977 sec  
RG 101  
DW 16.600 usec  
DE 18.00 usec  
TE 298.0 K  
D1 2.00000000 sec  
D11 0.03000000 sec  
TD0 1  
SFO1 125.6732948 MHz  
NUC1 13C  
P1 10.00 usec  
PLW1 51.23600006 W  
SFO2 499.7459990 MHz  
NUC2 1H  
CPDPRG[2] waltz16  
PCPD2 80.00 usec  
PLW2 15.53100014 W  
PLW12 0.34944999 W  
PLW13 0.17549001 W

F2 - Processing parameters  
SI 32768  
SF 125.6607287 MHz  
WDW EM  
SSB 0  
LB 1.00 Hz  
GB 0  
PC 1.40

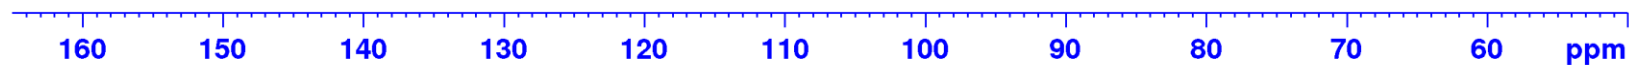

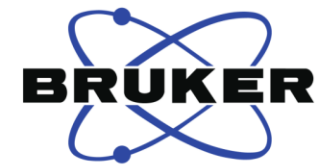

Current Data Parameters  
NAME CD108s  
EXPNO 5  
PROCNO 1

F2 - Acquisition Parameters  
Date\_ 20191217  
Time 3.42 h  
INSTRUM spect  
PROBHD Z108618\_0921 (  
PULPROG zg30  
TD 65536  
SOLVENT D2O  
NS 4  
DS 0  
SWH 64102.563 Hz  
FIDRES 1.956255 Hz  
AQ 0.5111808 sec  
RG 196.38  
DW 7.800 usec  
DE 50.00 usec  
TE 299.2 K  
D1 2.00000000 sec  
TD0 1  
SFO1 161.9796378 MHz  
NUC1 31P  
P1 15.00 usec  
PLW1 11.77099991 W

F2 - Processing parameters  
SI 32768  
SF 161.9877372 MHz  
WDW EM  
SSB 0  
LB 1.00 Hz  
GB 0  
PC 1.40

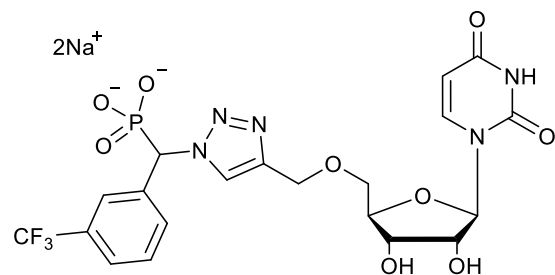

13e-(s) (<sup>31</sup>P NMR)

8.01

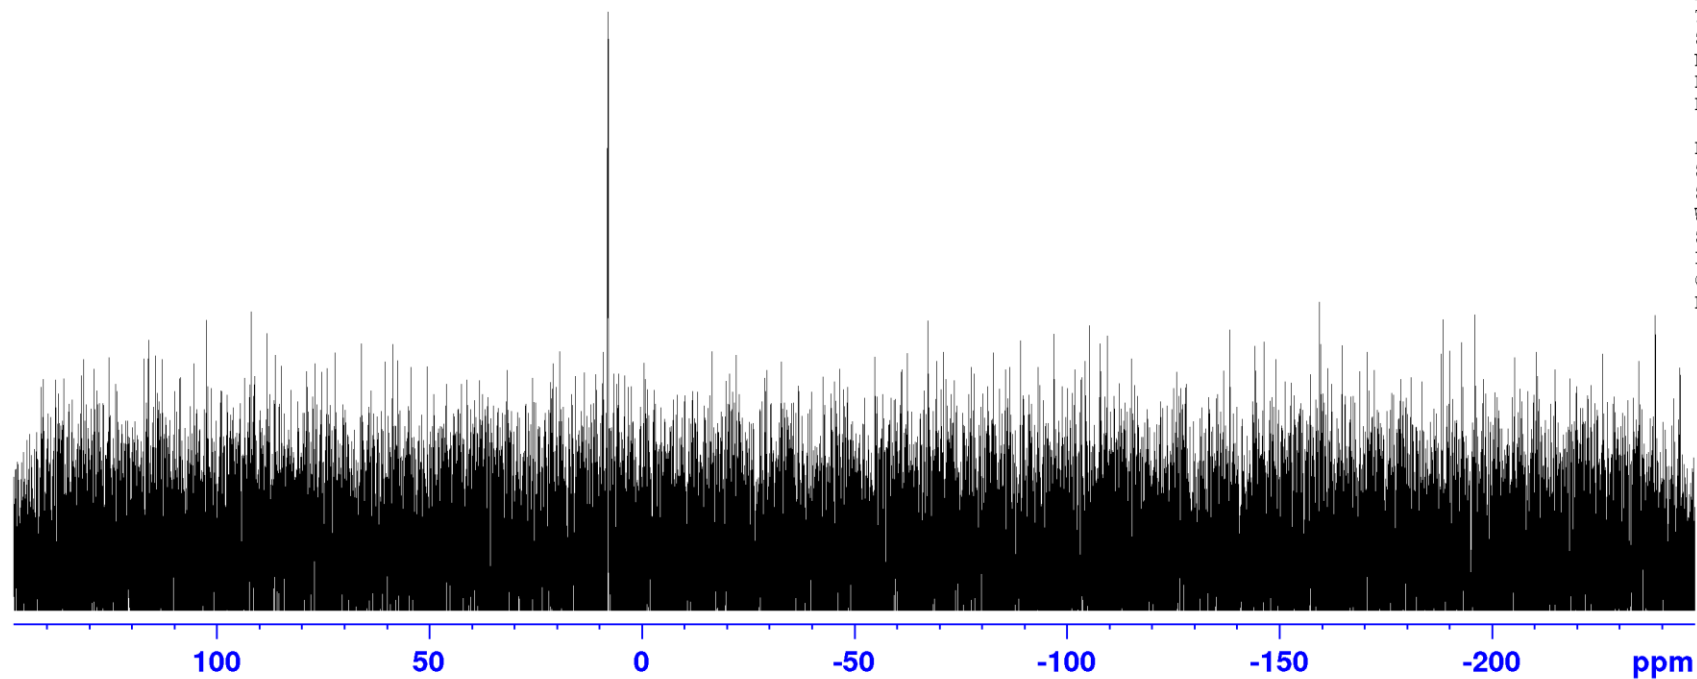

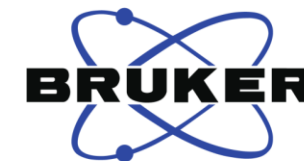

Current Data Parameters  
NAME CD108s  
EXPNO 6  
PROCNO 1

F2 - Acquisition Parameters  
Date\_ 20191217  
Time 3.43 h  
INSTRUM spect  
PROBHD z108618\_0921 (  
PULPROG zgflqn  
TD 65536  
SOLVENT D2O  
NS 4  
DS 0  
SWH 89285.711 Hz  
FIDRES 2.724784 Hz  
AQ 0.3670016 sec  
RG 196.38  
DW 5.600 usec  
DE 120.00 usec  
TE 299.2 K  
D1 1.00000000 sec  
TD0 1  
SFO1 376.4889413 MHz  
NUC1 19F  
P1 15.00 usec  
PLW1 17.75399971 W

F2 - Processing parameters  
SI 65536  
SF 376.5265940 MHz  
WDW EM  
SSB 0  
LB 0.30 Hz  
GB 0  
PC 1.00

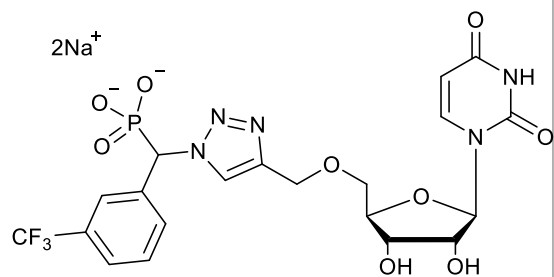

**13e-(s) (<sup>19</sup>F NMR)**

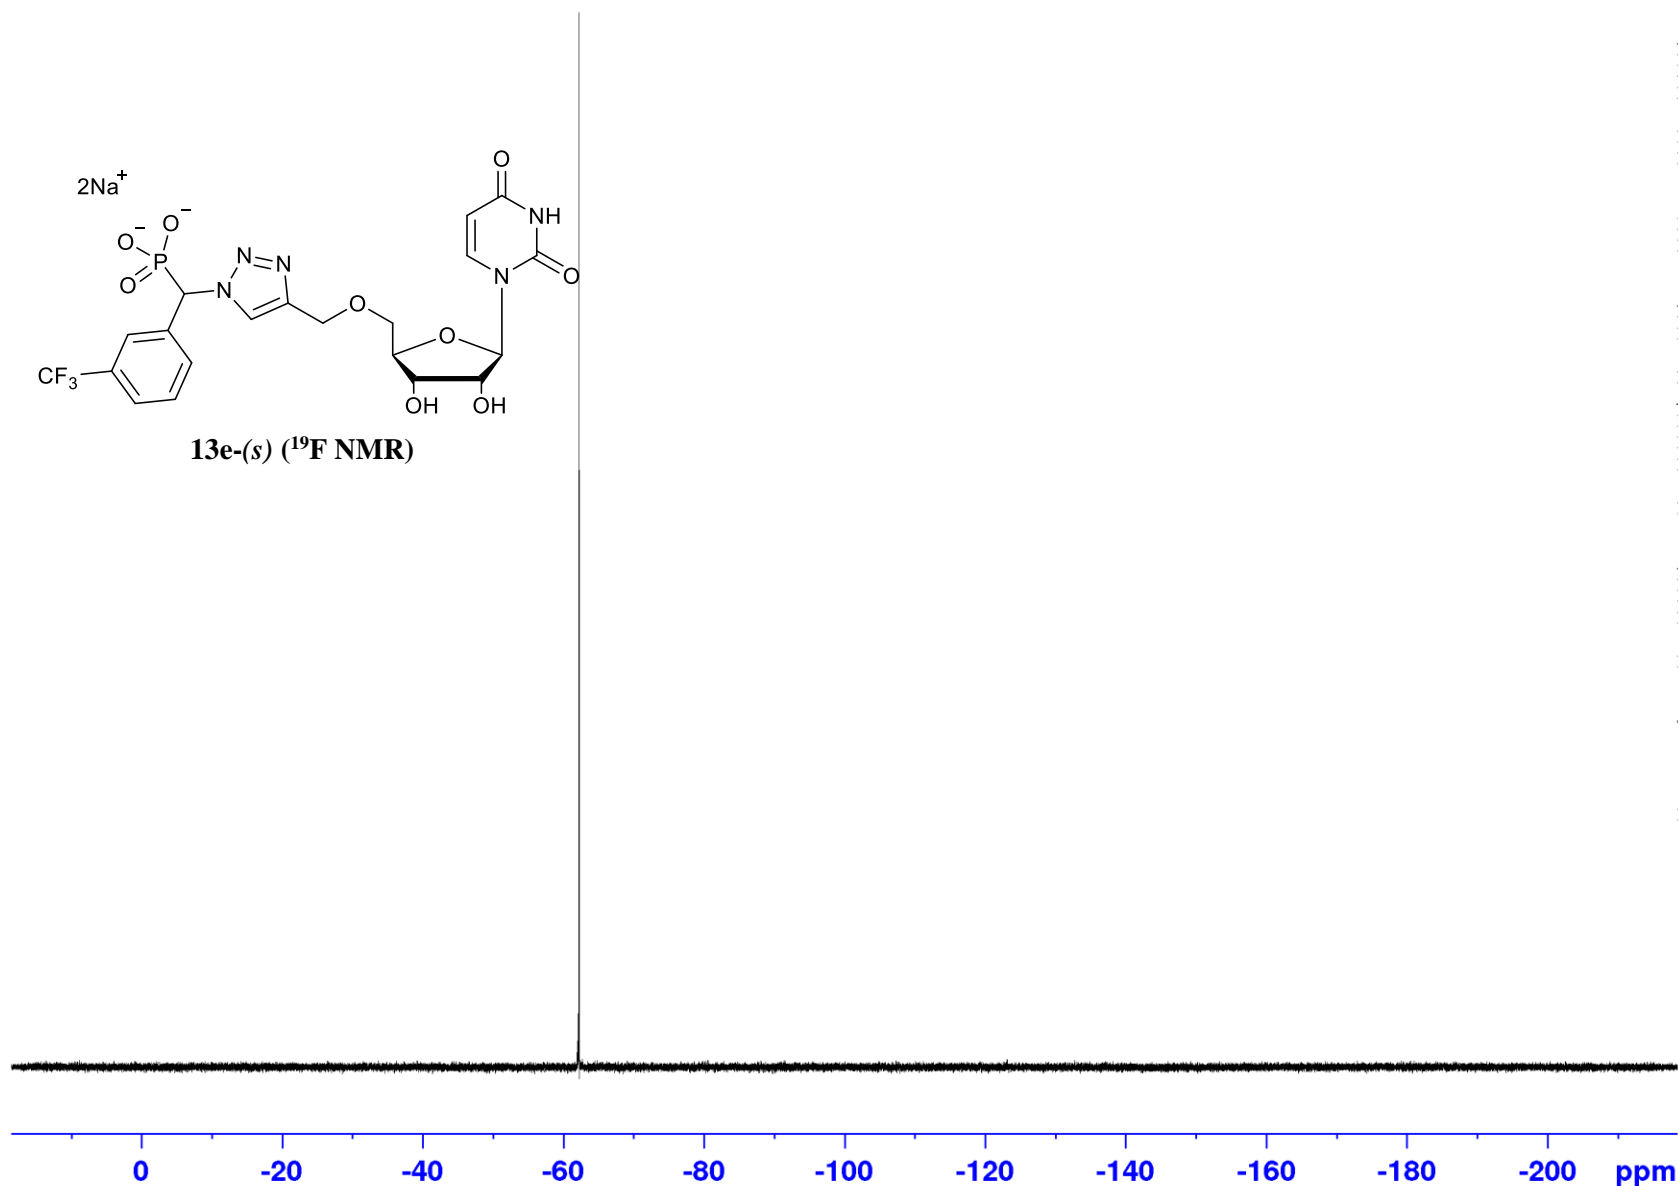

8.81

7.79  
7.77  
7.74  
7.72  
7.65  
7.63  
7.62  
7.37  
7.356.10  
6.05  
5.97  
5.965.45  
5.434.97  
4.94  
4.92  
4.884.35  
4.33  
4.32  
4.31  
4.13  
4.10  
4.04  
4.03  
4.01  
4.00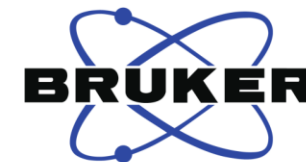

## Current Data Parameters

NAME cd2\_191217\_55  
EXPNO 1  
PROCNO 1

## F2 - Acquisition Parameters

Date\_ 20191217  
Time 12.07 h  
INSTRUM spect  
PROBHD Z108618\_0921 (  
PULPROG zg30  
TD 65536  
SOLVENT D2O  
NS 32  
DS 2  
SWH 8012.820 Hz  
FIDRES 0.244532 Hz  
AQ 4.0894465 sec  
RG 196.38  
DW 62.400 usec  
DE 6.50 usec  
TE 299.2 K  
D1 1.00000000 sec  
TD0 1  
SFO1 400.1624710 MHz  
NUC1 1H  
P1 14.00 usec  
PLW1 11.52400017 W

## F2 - Processing parameters

SI 65536  
SF 400.1599647 MHz  
WDW EM  
SSB 0  
LB 0.30 Hz  
GB 0  
PC 1.00

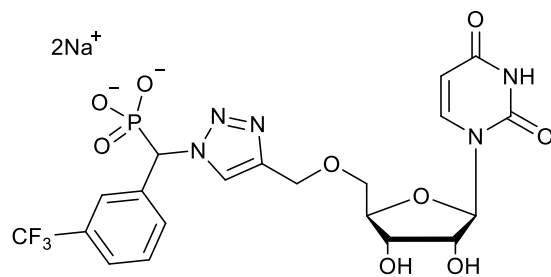13e-(I) (<sup>1</sup>H NMR)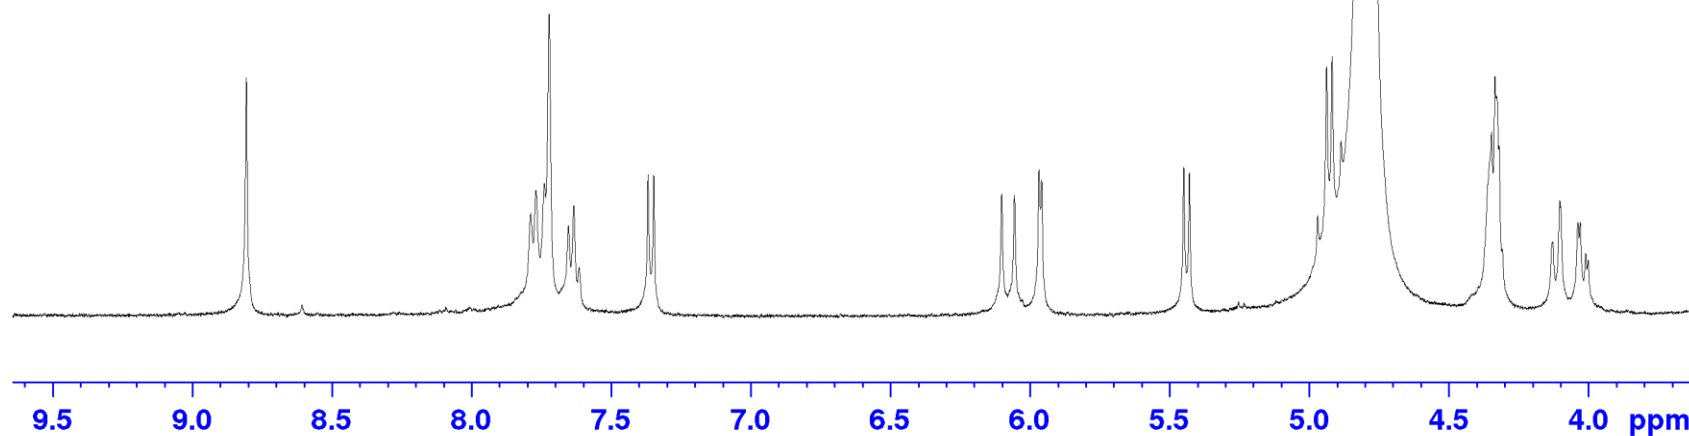

166.78

152.78

148.17

145.20

142.27

139.76

133.03

130.80

130.51

126.59

125.79

125.02

102.95

102.21

97.11

90.01

84.91

75.72

71.56

70.18

66.75

65.50

64.71

49.71

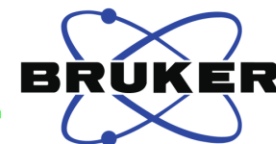

Current Data Parameters  
 NAME CD108s  
 EXPNO 3  
 PROCNO 1

F2 - Acquisition Parameters  
 Date\_ 20191217  
 Time 3.09 h  
 INSTRUM spect  
 PROBHD Z108618\_0921 (   
 PULPROG zgpg30  
 TD 65536  
 SOLVENT D2O  
 NS 2500  
 DS 4  
 SWH 24038.461 Hz  
 FIDRES 0.733596 Hz  
 AQ 1.3631488 sec  
 RG 196.38  
 DW 20.800 usec  
 DE 6.50 usec  
 TE 299.2 K  
 D1 2.00000000 sec  
 D11 0.03000000 sec  
 TD0 1  
 SFO1 100.6303741 MHz  
 NUC1 13C  
 P1 10.00 usec  
 PLW1 55.50099945 W  
 SFO2 400.1616006 MHz  
 NUC2 1H  
 CPDPRG[2] waltz16  
 PCPD2 90.00 usec  
 PLW2 11.52400017 W  
 PLW12 0.27886000 W  
 PLW13 0.14026000 W

F2 - Processing parameters  
 SI 32768  
 SF 100.6202010 MHz  
 WDW EM  
 SSB 0  
 LB 1.00 Hz  
 GB 0  
 PC 1.40

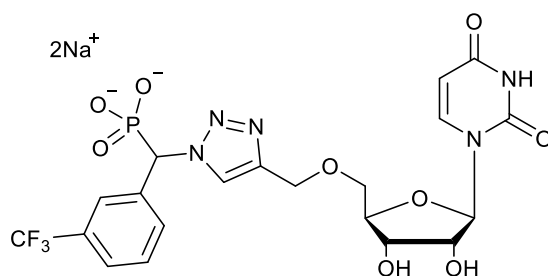

**13e-(I) (<sup>13</sup>C NMR)**

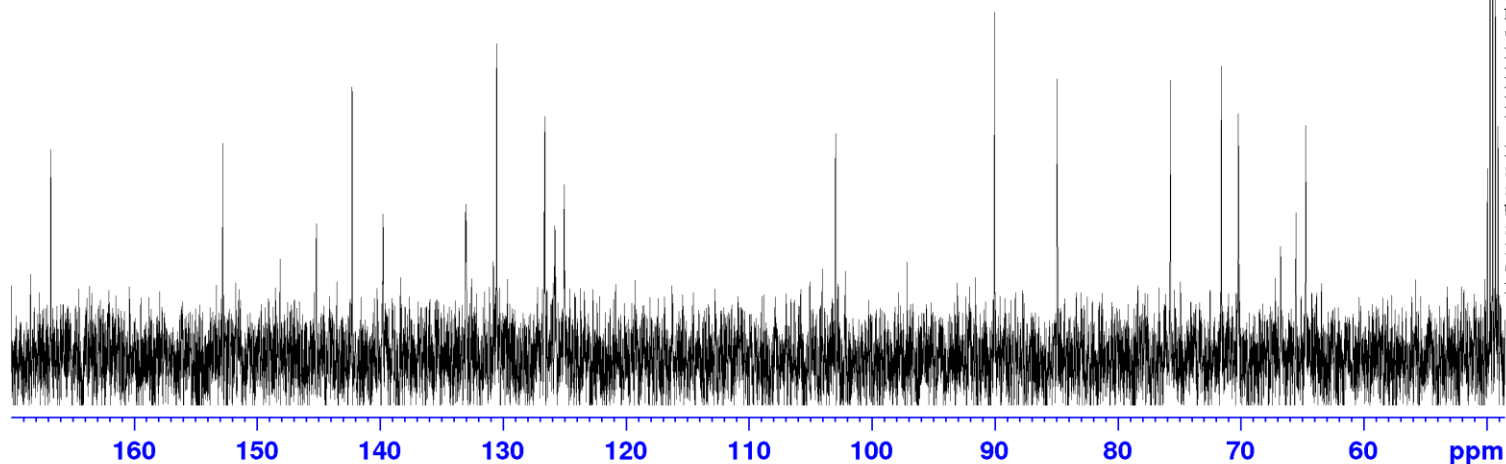

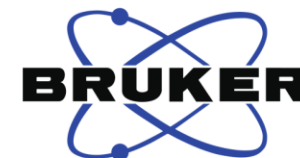

8.15

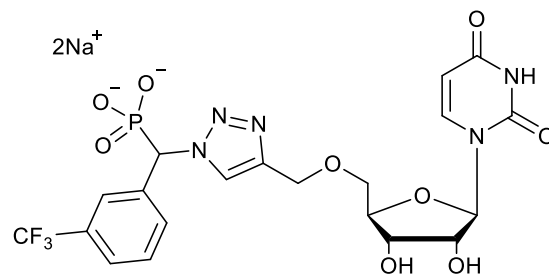

**13e-(l) (<sup>31</sup>P NMR)**

Current Data Parameters  
NAME CD1081  
EXPNO 5  
PROCNO 1

F2 - Acquisition Parameters  
Date\_ 20191217  
Time 4.47 h  
INSTRUM spect  
PROBHD Z108618\_0921 (   
PULPROG zg30  
TD 65536  
SOLVENT D2O  
NS 4  
DS 0  
SWH 64102.563 Hz  
FIDRES 1.956255 Hz  
AQ 0.5111808 sec  
RG 196.38  
DW 7.800 usec  
DE 50.00 usec  
TE 299.1 K  
D1 2.00000000 sec  
TD0 1  
SFO1 161.9796378 MHz  
NUC1 31P  
P1 15.00 usec  
PLW1 11.77099991 W

F2 - Processing parameters  
SI 32768  
SF 161.9877372 MHz  
WDW EM  
SSB 0  
LB 1.00 Hz  
GB 0  
PC 1.40

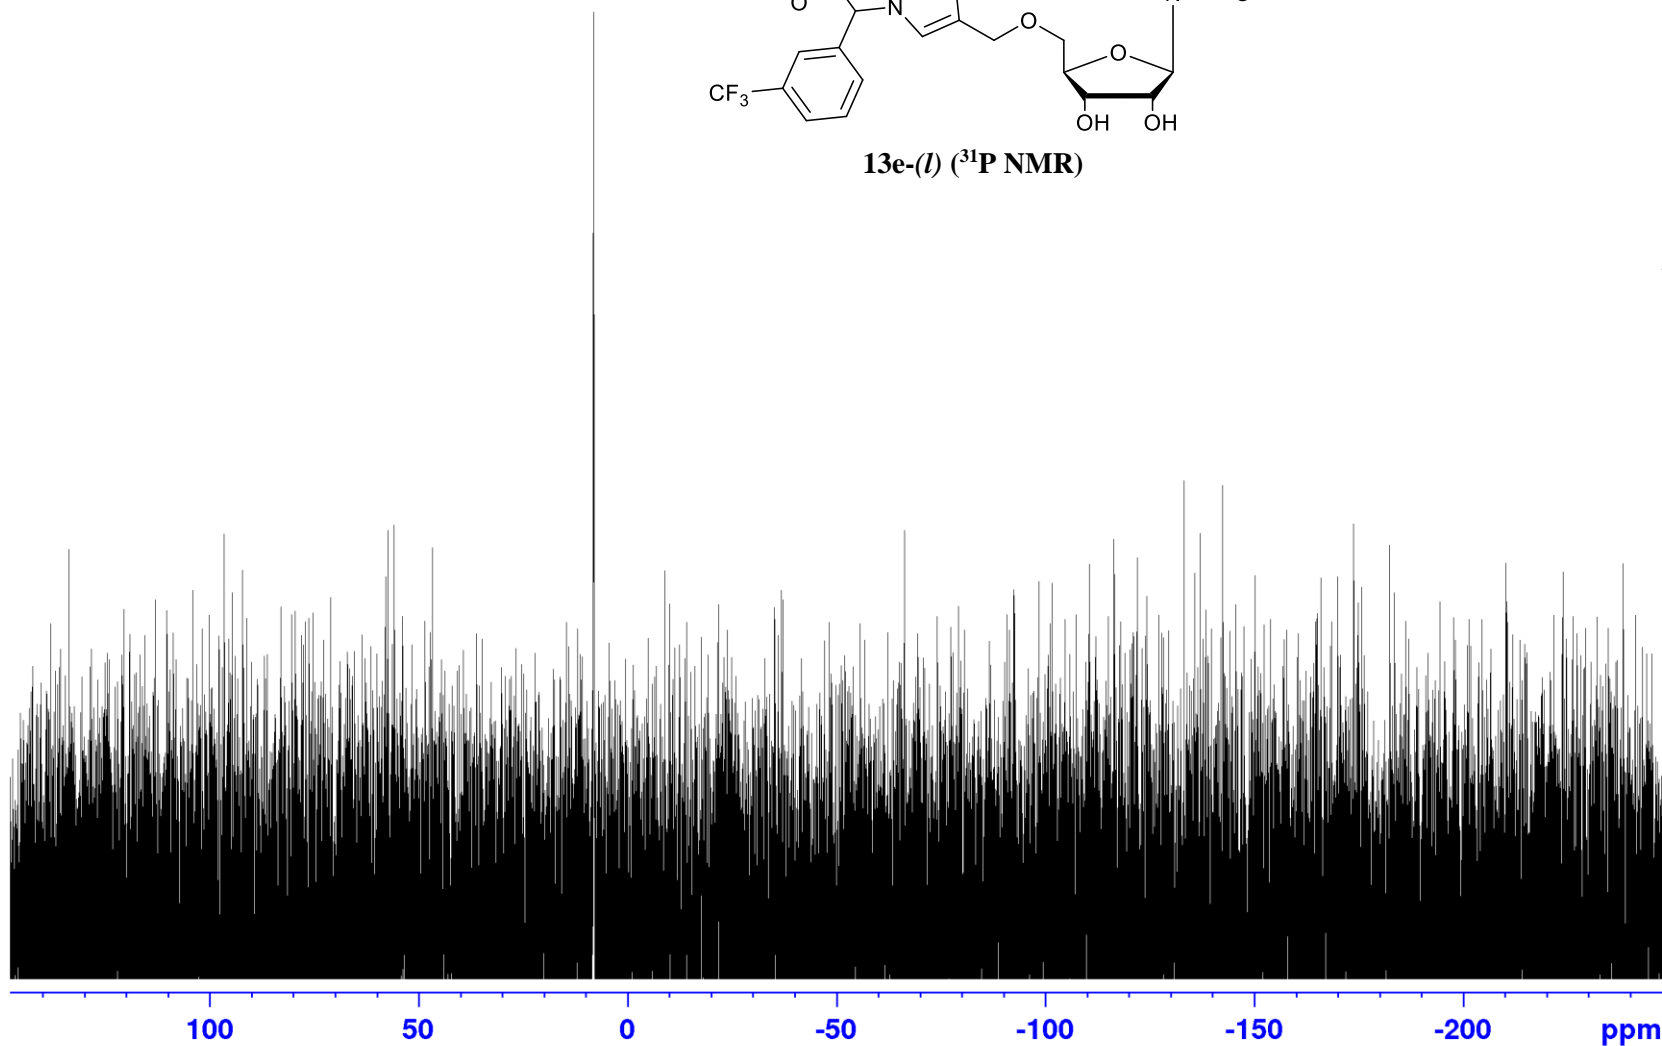

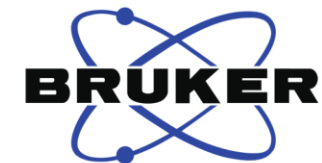

Current Data Parameters  
NAME CD1081  
EXPNO 6  
PROCNO 1

F2 - Acquisition Parameters  
Date\_ 20191217  
Time 4.48 h  
INSTRUM spect  
PROBHD Z108618\_0921 (  
PULPROG zgflqn  
TD 65536  
SOLVENT D2O  
NS 4  
DS 0  
SWH 89285.711 Hz  
FIDRES 2.724784 Hz  
AQ 0.3670016 sec  
RG 196.38  
DW 5.600 usec  
DE 120.00 usec  
TE 299.1 K  
D1 1.00000000 sec  
TD0 1  
SFO1 376.4889413 MHz  
NUC1 19F  
P1 15.00 usec  
PLW1 17.75399971 W

F2 - Processing parameters  
SI 65536  
SF 376.5265940 MHz  
WDW EM  
SSB 0  
LB 0.30 Hz  
GB 0  
PC 1.00

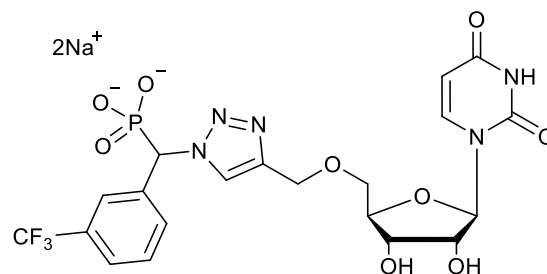

13e-(I) (<sup>19</sup>F NMR)

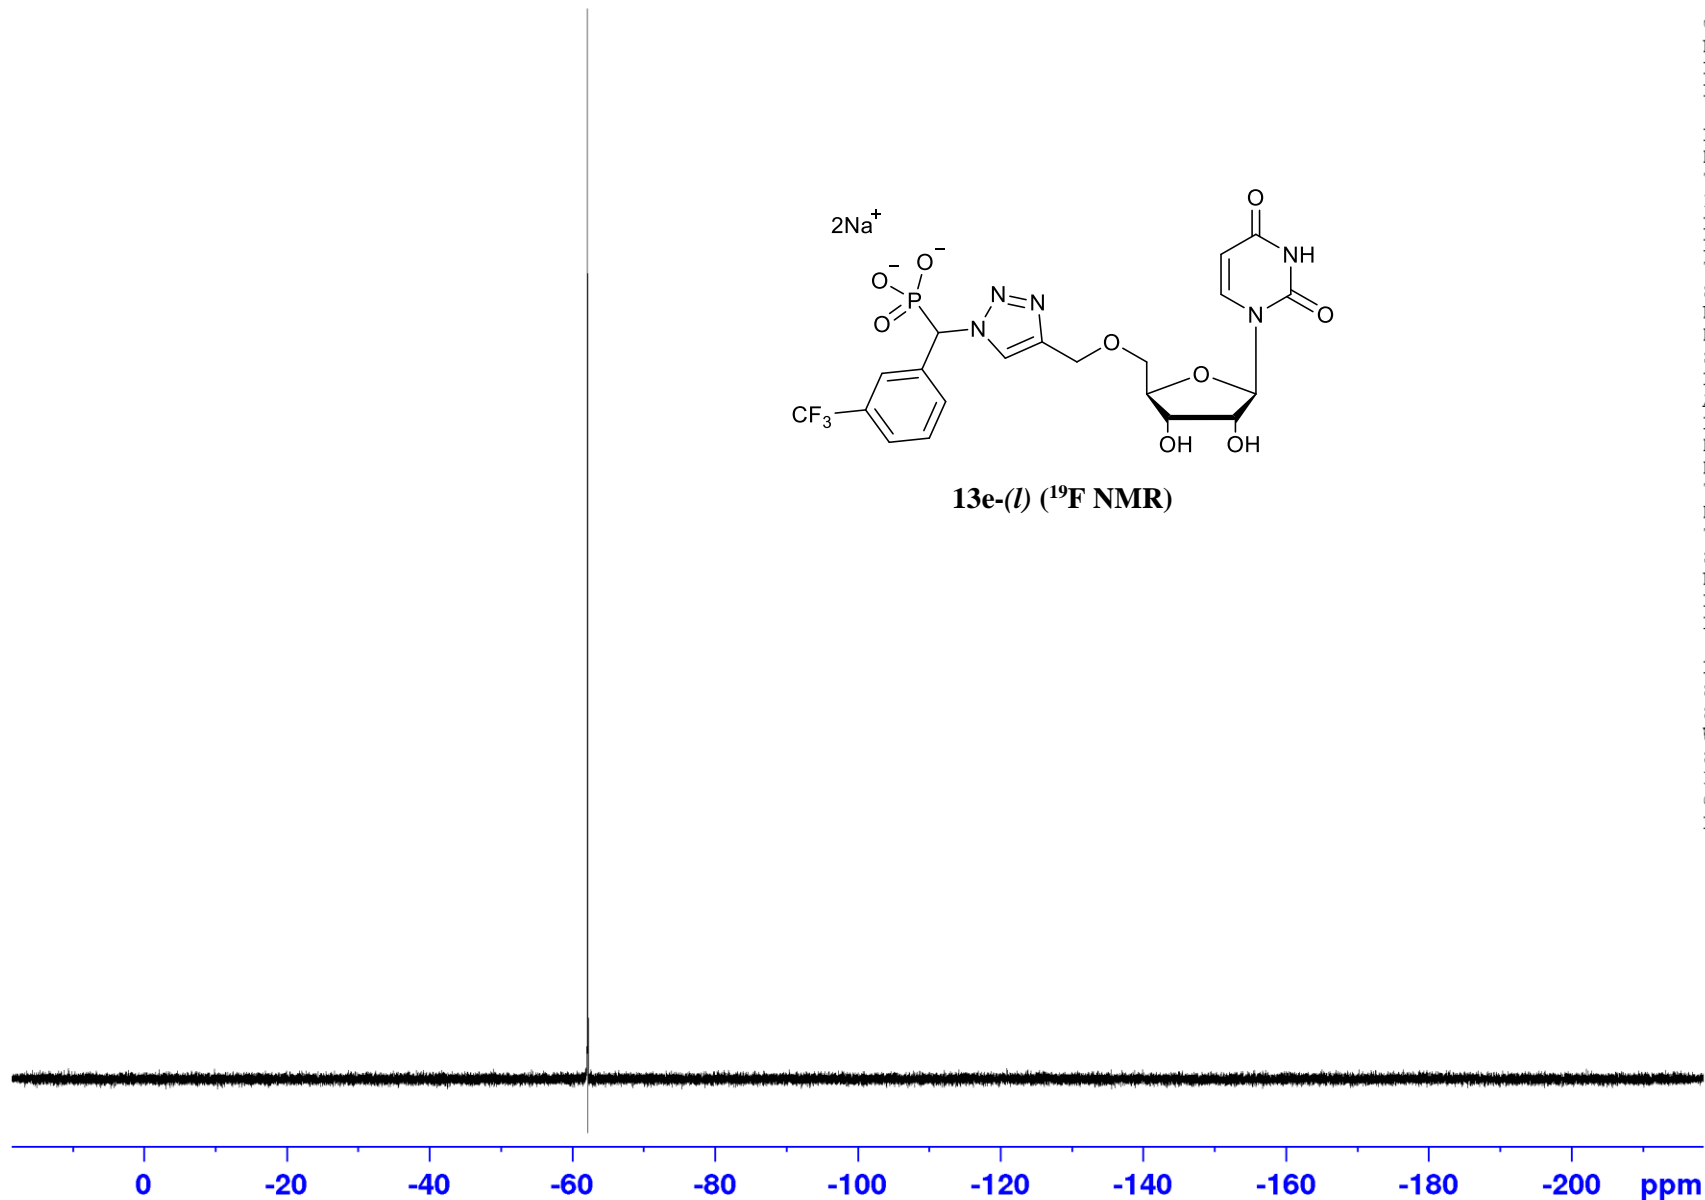

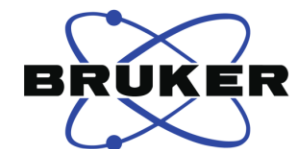

Current Data Parameters

NAME CD66\_s  
EXPNO 1  
PROCNO 1

F2 - Acquisition Parameters

Date\_ 20180604  
Time 13.37 h  
INSTRUM spect  
PROBHD Z108618\_0921 (  
PULPROG zg30  
TD 65536  
SOLVENT D2O  
NS 16  
DS 2  
SWH 8012.820 Hz  
FIDRES 0.244532 Hz  
AQ 4.0894465 sec  
RG 158.68  
DW 62.400 usec  
DE 6.50 usec  
TE 298.5 K  
D1 1.00000000 sec  
TD0 1  
SFO1 400.1624710 MHz  
NUC1 1H  
P1 14.00 usec  
PLW1 11.52400017 W

F2 - Processing parameters

SI 65536  
SF 400.1599746 MHz  
WDW EM  
SSB 0  
LB 0.30 Hz  
GB 0  
PC 1.00

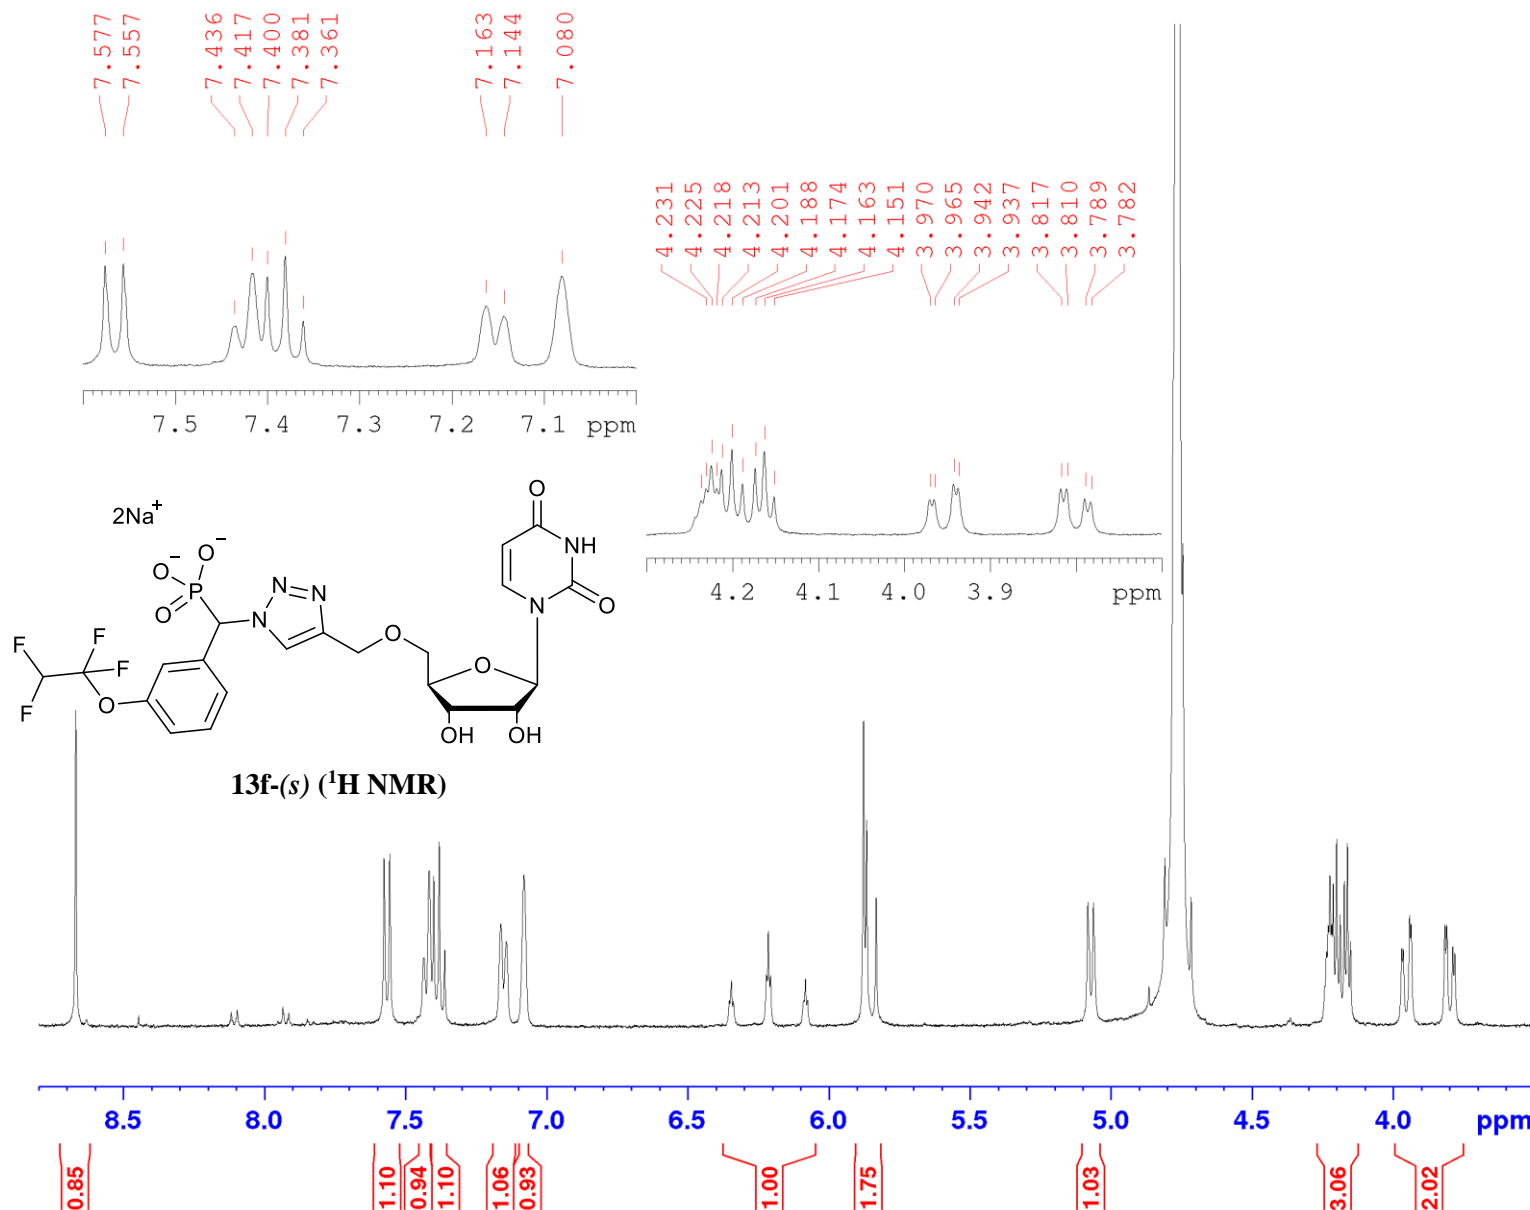

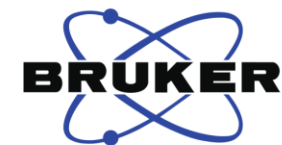

Current Data Parameters  
 NAME CD66\_s  
 EXPNO 2  
 PROCNO 1

F2 - Acquisition Parameters  
 Date\_ 20180604  
 Time 20.00 h  
 INSTRUM spect  
 PROBHD Z108618\_0921 (  
 PULPROG zgpg30  
 TD 65536  
 SOLVENT D2O  
 NS 2048  
 DS 4  
 SWH 24038.461 Hz  
 FIDRES 0.733596 Hz  
 AQ 1.3631488 sec  
 RG 196.38  
 DW 20.800 usec  
 DE 6.50 usec  
 TE 299.0 K  
 D1 2.00000000 sec  
 D11 0.03000000 sec  
 TD0 1  
 SFO1 100.6303741 MHz  
 NUC1 13C  
 P1 10.00 usec  
 PLW1 55.50099945 W  
 SFO2 400.1616006 MHz  
 NUC2 1H  
 CPDPRG[2] waltz16  
 PCPD2 90.00 usec  
 PLW2 11.52400017 W  
 PLW12 0.27886000 W  
 PLW13 0.14026000 W

F2 - Processing parameters  
 SI 32768  
 SF 100.6202477 MHz  
 WDW EM  
 SSB 0  
 LB 1.00 Hz  
 GB 0  
 PC 1.40

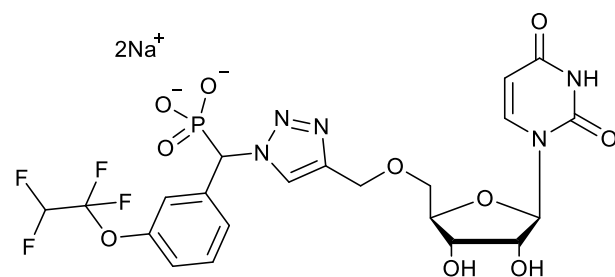

13f-(s) (<sup>13</sup>C NMR)

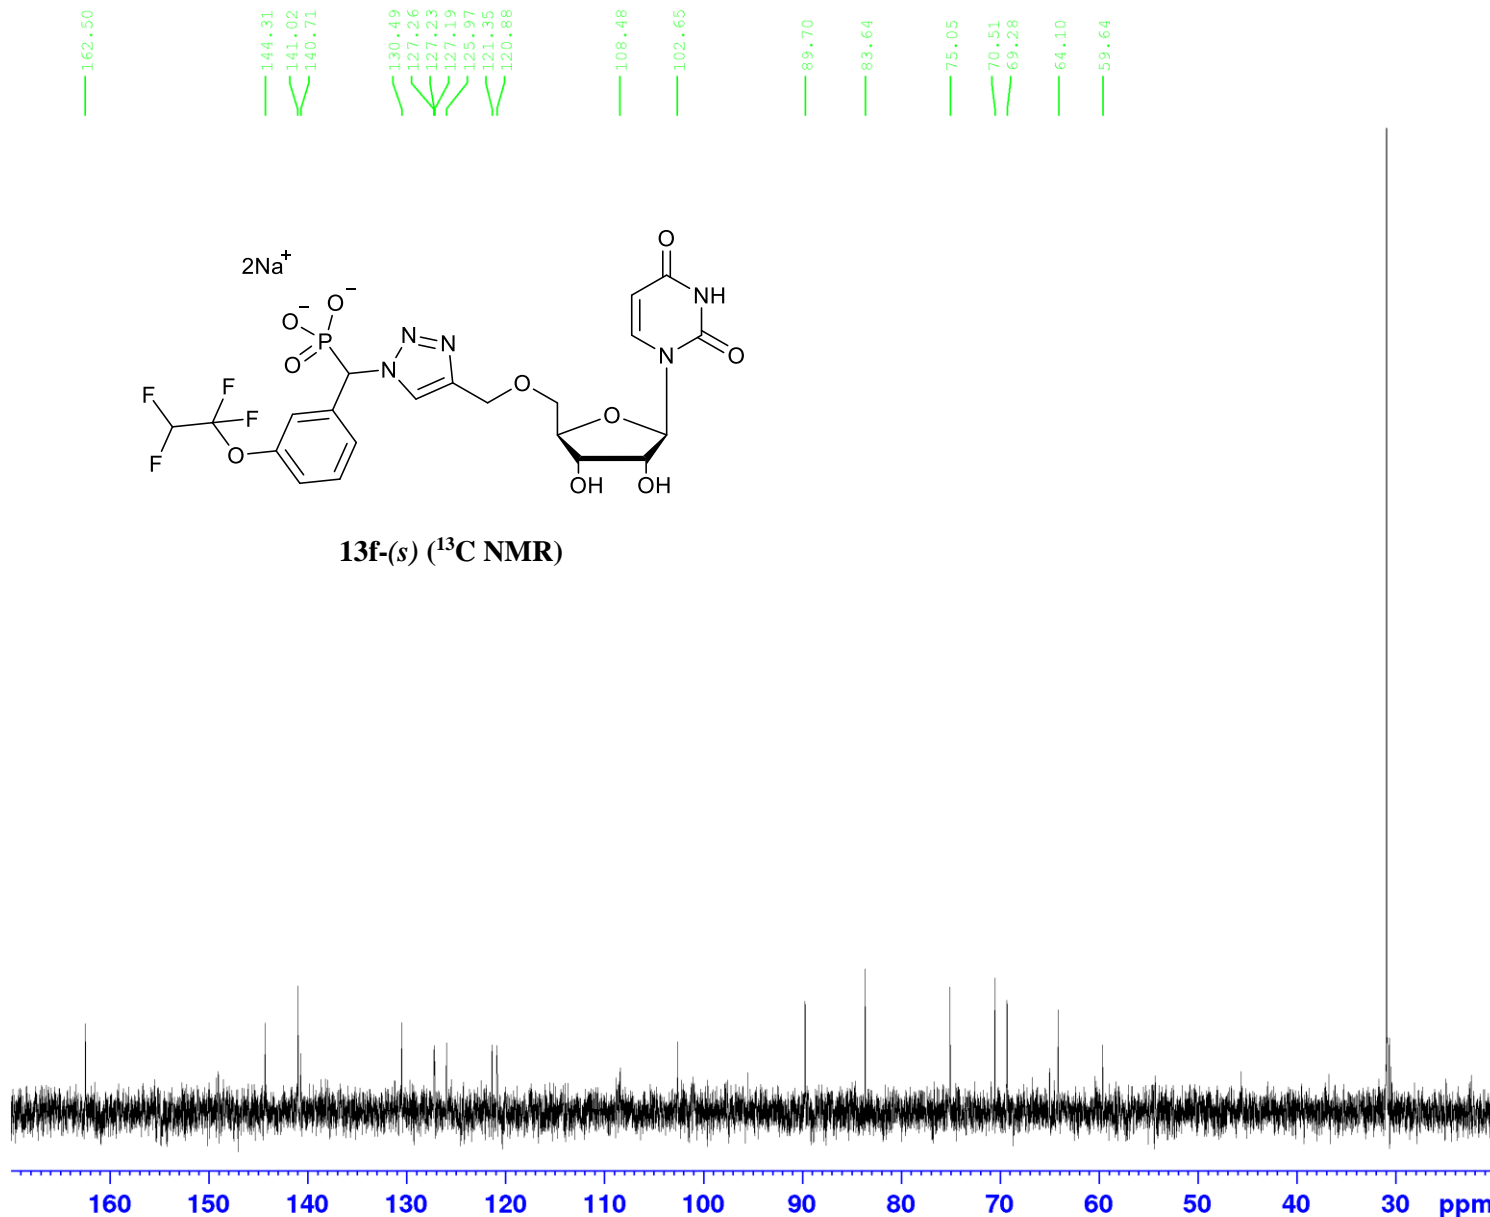

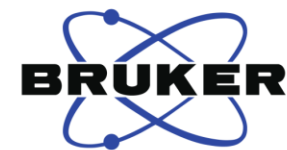

Current Data Parameters  
NAME CD66\_s  
EXPNO 7  
PROCNO 1

F2 - Acquisition Parameters  
Date\_ 20180604  
Time 22.12 h  
INSTRUM spect  
PROBHD Z108618\_0921  
PULPROG zgpg30  
TD 65536  
SOLVENT D2O  
NS 16  
DS 4  
SWH 64102.563 Hz  
FIDRES 1.956255 Hz  
AQ 0.5111808 sec  
RG 196.38  
DW 7.800 usec  
DE 6.50 usec  
TE 299.2 K  
D1 2.00000000 sec  
D11 0.03000000 sec  
TD0 1  
SFO1 161.9796378 MHz  
NUC1 31P  
P1 15.00 usec  
PLW1 11.77099991 W  
SFO2 400.1616006 MHz  
NUC2 1H  
CPDPRG[2] waltz16  
PCPD2 90.00 usec  
PLW2 11.52400017 W  
PLW12 0.27886000 W  
PLW13 0.14026000 W

F2 - Processing parameters  
SI 32768  
SF 161.9877372 MHz  
WDW EM  
SSB 0  
LB 1.00 Hz  
GB 0  
PC 1.40

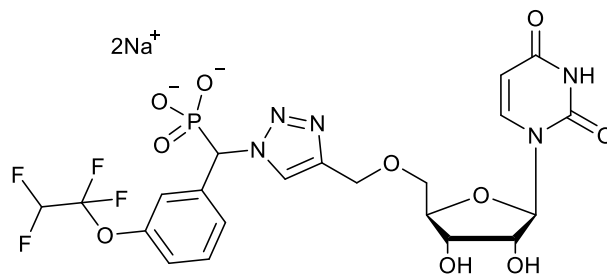

13f-(s) (<sup>31</sup>P NMR)

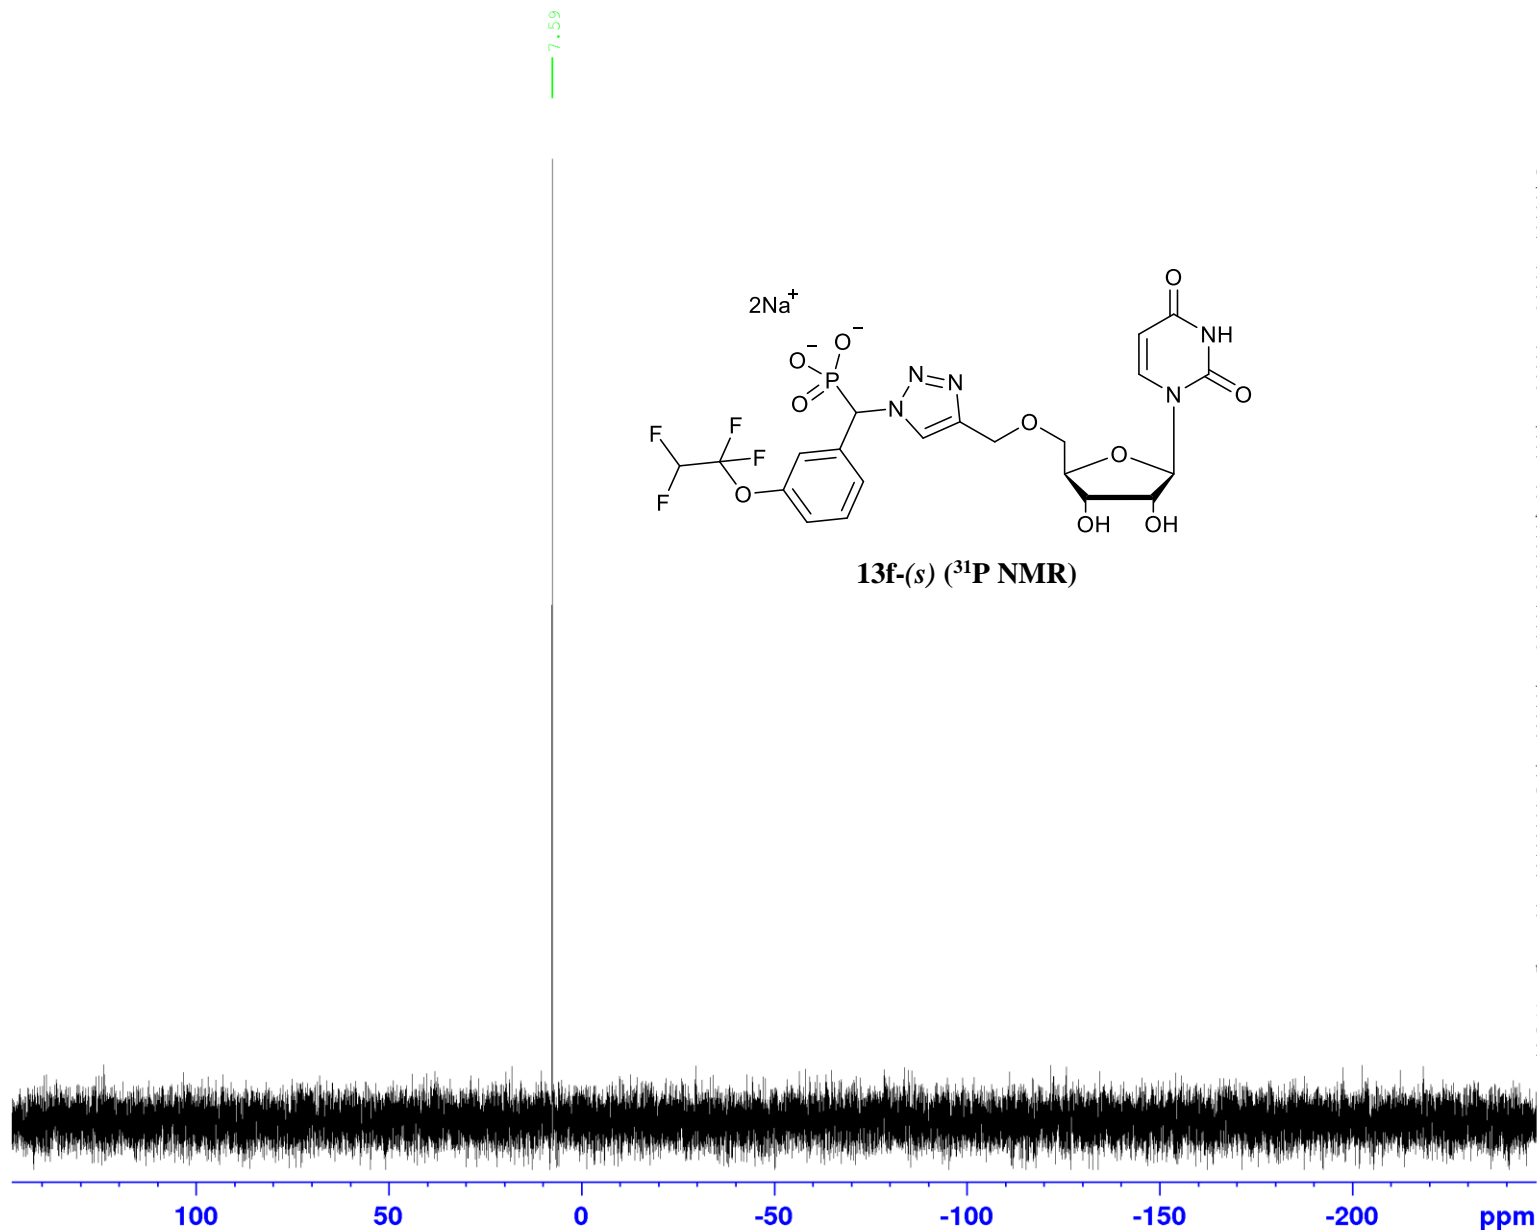

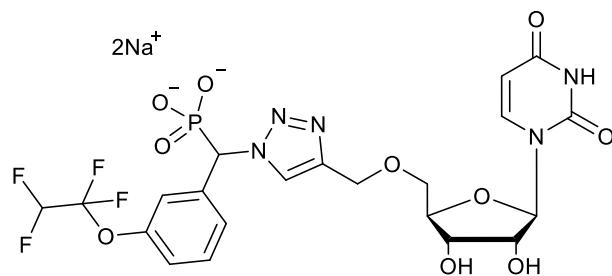

**13f-(s) ( $^{19}\text{F}$  NMR)**

-87.93  
-88.31  
-88.56  
-88.95

-137.61  
-137.63  
-137.65

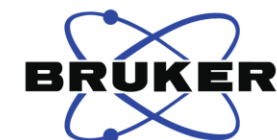

Current Data Parameters  
NAME CD66\_s  
EXPNO 6  
PROCNO 1

F2 - Acquisition Parameters  
Date\_ 20180604  
Time 22.10 h  
INSTRUM spect  
PROBHD Z108618\_0921 (  
PULPROG zgfhigqn.2  
TD 131072  
SOLVENT D2O  
NS 16  
DS 4  
SWH 89285.711 Hz  
FIDRES 1.362392 Hz  
AQ 0.7340032 sec  
RG 196.38  
DW 5.600 usec  
DE 6.50 usec  
TE 299.1 K  
D1 1.00000000 sec  
D11 0.03000000 sec  
D12 0.00002000 sec  
TD0 1  
SFO1 376.4889418 MHz  
NUC1 19F  
P1 15.00 usec  
PLW1 17.75399971 W  
SFO2 400.1616006 MHz  
NUC2 1H  
CPDPRG[2] waltz16  
PCPD2 90.00 usec  
PLW2 11.52400017 W  
PLW12 0.27886000 W

F2 - Processing parameters  
SI 65536  
SF 376.5265944 MHz  
WDW EM  
SSB 0  
LB 0.30 Hz  
GB 0  
PC 1.00

-40 -50 -60 -70 -80 -90 -100 -110 -120 -130 -140 -150 -160 ppm

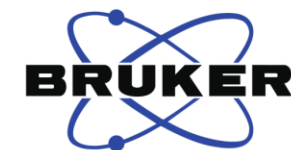

Current Data Parameters  
 NAME CD66\_1  
 EXPNO 2  
 PROCNO 1

F2 - Acquisition Parameters  
 Date\_ 20180605  
 Time 0.19 h  
 INSTRUM spect  
 PROBHD Z108618\_0921 (  
 PULPROG zg30  
 TD 65536  
 SOLVENT D2O  
 NS 64  
 DS 2  
 SWH 8012.820 Hz  
 FIDRES 0.244532 Hz  
 AQ 4.0894465 sec  
 RG 196.38  
 DW 62.400 usec  
 DE 6.50 usec  
 TE 299.0 K  
 D1 1.00000000 sec  
 TD0 1  
 SFO1 400.1624710 MHz  
 NUC1 1H  
 P1 14.00 usec  
 PLW1 11.52400017 W

F2 - Processing parameters  
 SI 65536  
 SF 400.1600367 MHz  
 WDW EM  
 SSB 0  
 LB 0.30 Hz  
 GB 0  
 PC 1.00

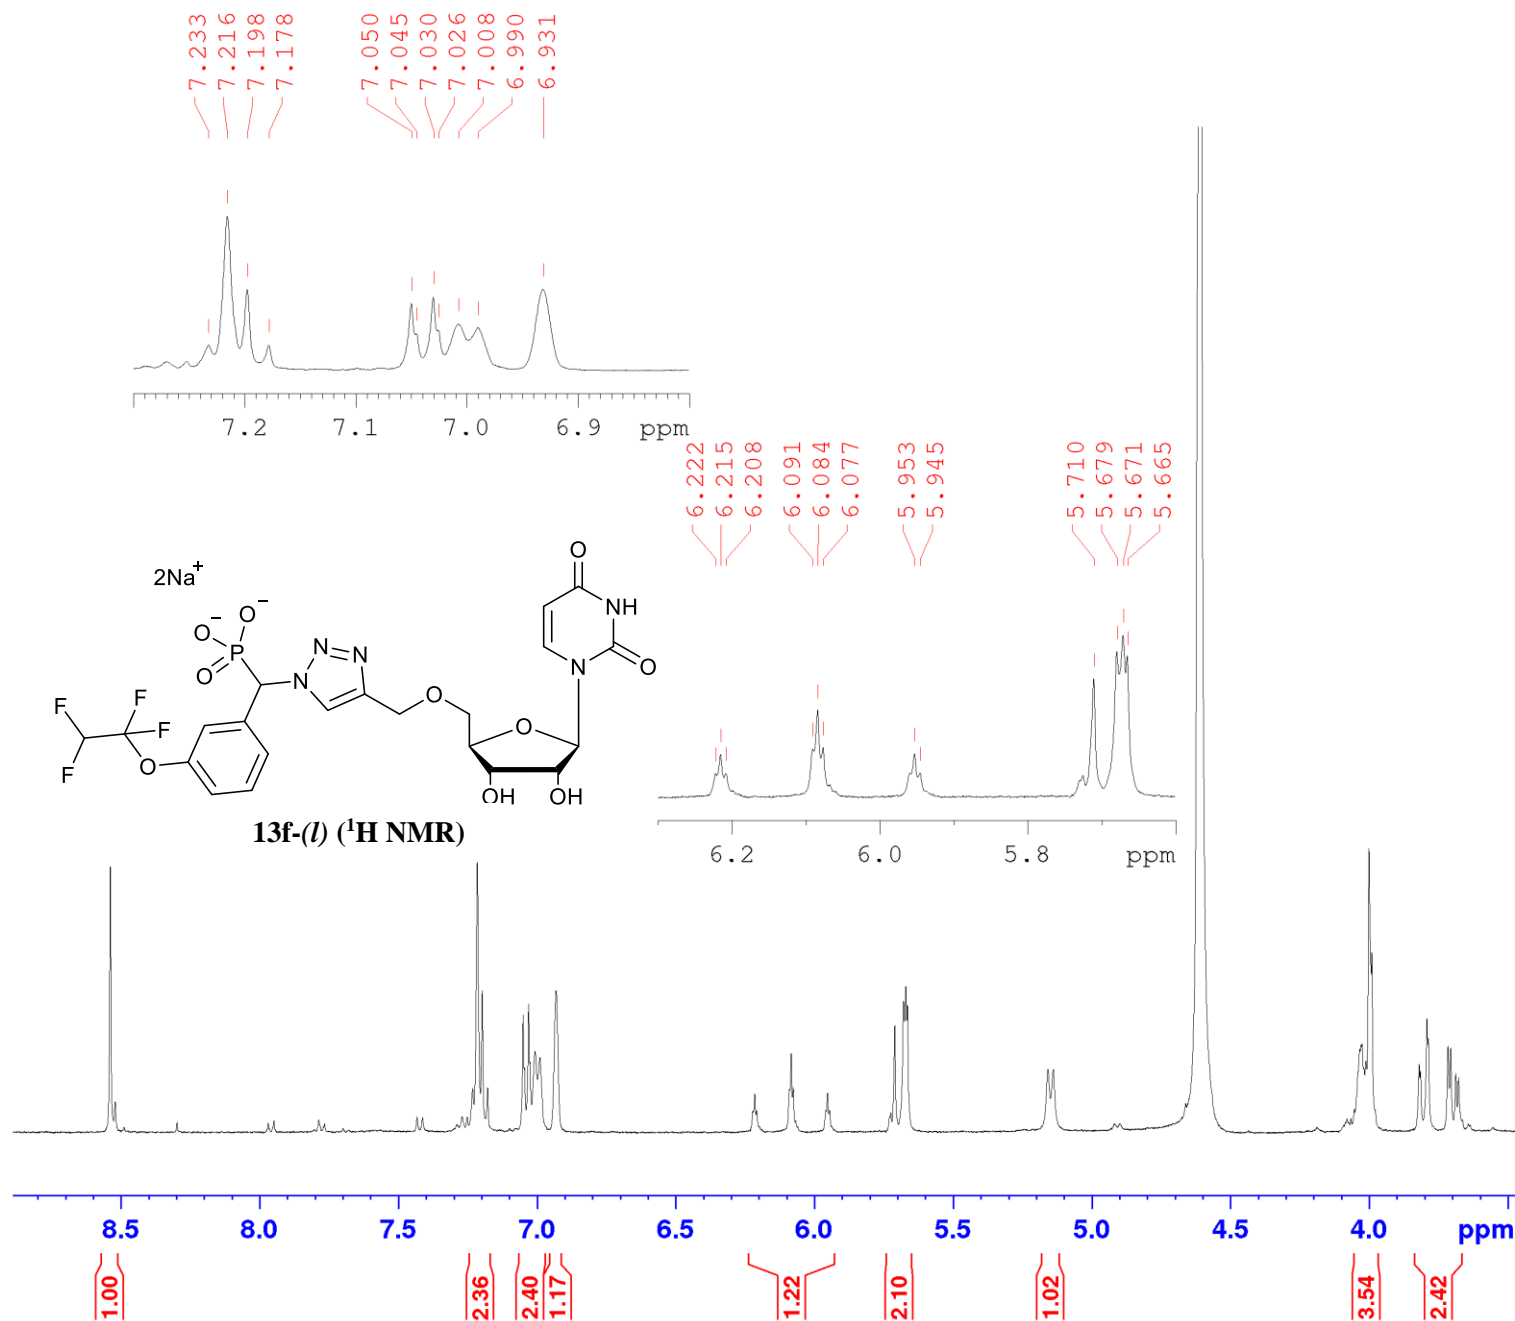

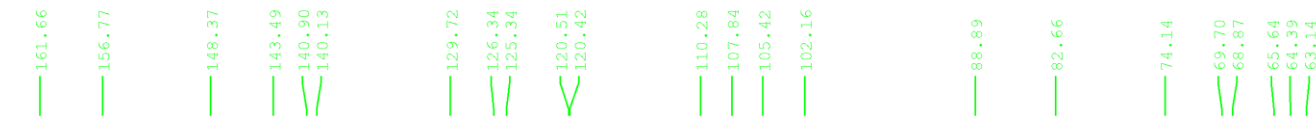

Current Data Parameters  
NAME CD66\_1  
EXPNO 1  
PROCNO 1

F2 - Acquisition Parameters  
Date\_ 20180605  
Time 0.13 h  
INSTRUM spect  
PROBHD Z108618\_0921 (  
PULPROG zgpg30  
TD 65536  
SOLVENT D2O  
NS 2048  
DS 4  
SWH 24038.461 Hz  
FIDRES 0.733596 Hz  
AQ 1.3631488 sec  
RG 196.38  
DW 20.800 usec  
DE 6.50 usec  
TE 299.5 K  
D1 2.00000000 sec  
D11 0.03000000 sec  
TD0 1  
SFO1 100.6303741 MHz  
NUC1 13C  
P1 10.00 usec  
PLW1 55.50099945 W  
SFO2 400.1616006 MHz  
NUC2 1H  
CPDPRG[2] waltz16  
PCPD2 90.00 usec  
PLW2 11.52400017 W  
PLW12 0.27886000 W  
PLW13 0.14026000 W

F2 - Processing parameters  
SI 32768  
SF 100.6203120 MHz  
WDW EM  
SSB 0  
LB 1.00 Hz  
GB 0  
PC 1.40

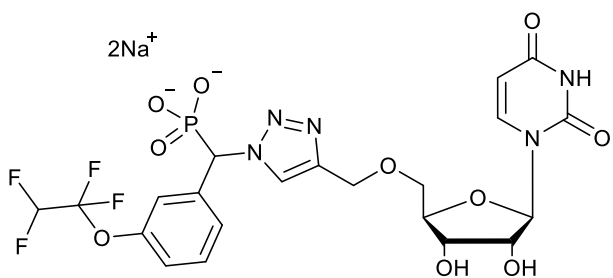

**13f-l) (<sup>13</sup>C NMR)**

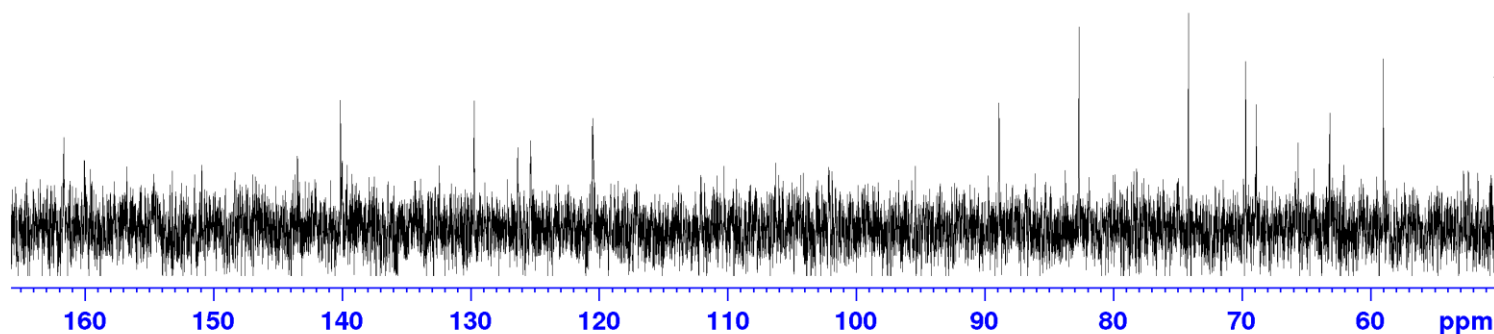

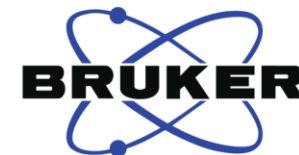

Current Data Parameters  
NAME CD66\_1  
EXPNO 6  
PROCNO 1

F2 - Acquisition Parameters  
Date\_ 20180605  
Time 2.24 h  
INSTRUM spect  
PROBHD z108618\_0921 (  
PULPROG zgpg30  
TD 65536  
SOLVENT D2O  
NS 16  
DS 4  
SWH 64102.563 Hz  
FIDRES 1.956255 Hz  
AQ 0.5111808 sec  
RG 196.38  
DW 7.800 usec  
DE 6.50 usec  
TE 299.1 K  
D1 2.00000000 sec  
D11 0.03000000 sec  
TD0 1  
SFO1 161.9796378 MHz  
NUC1 31P  
P1 15.00 usec  
PLW1 11.77099991 W  
SFO2 400.1616006 MHz  
NUC2 1H  
CPDPRG[2] waltz16  
PCPD2 90.00 usec  
PLW2 11.52400017 W  
PLW12 0.27886000 W  
PLW13 0.14026000 W

F2 - Processing parameters  
SI 32768  
SF 161.9877372 MHz  
WDW EM  
SSB 0  
LB 1.00 Hz  
GB 0  
PC 1.40

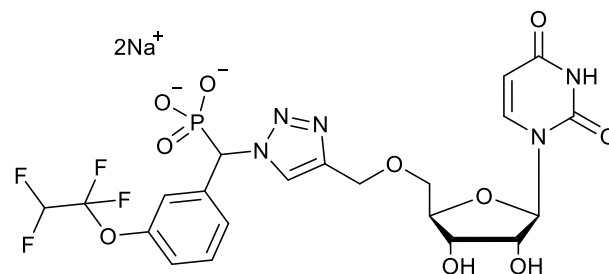

13f-(l) ( $^{31}\text{P}$  NMR)

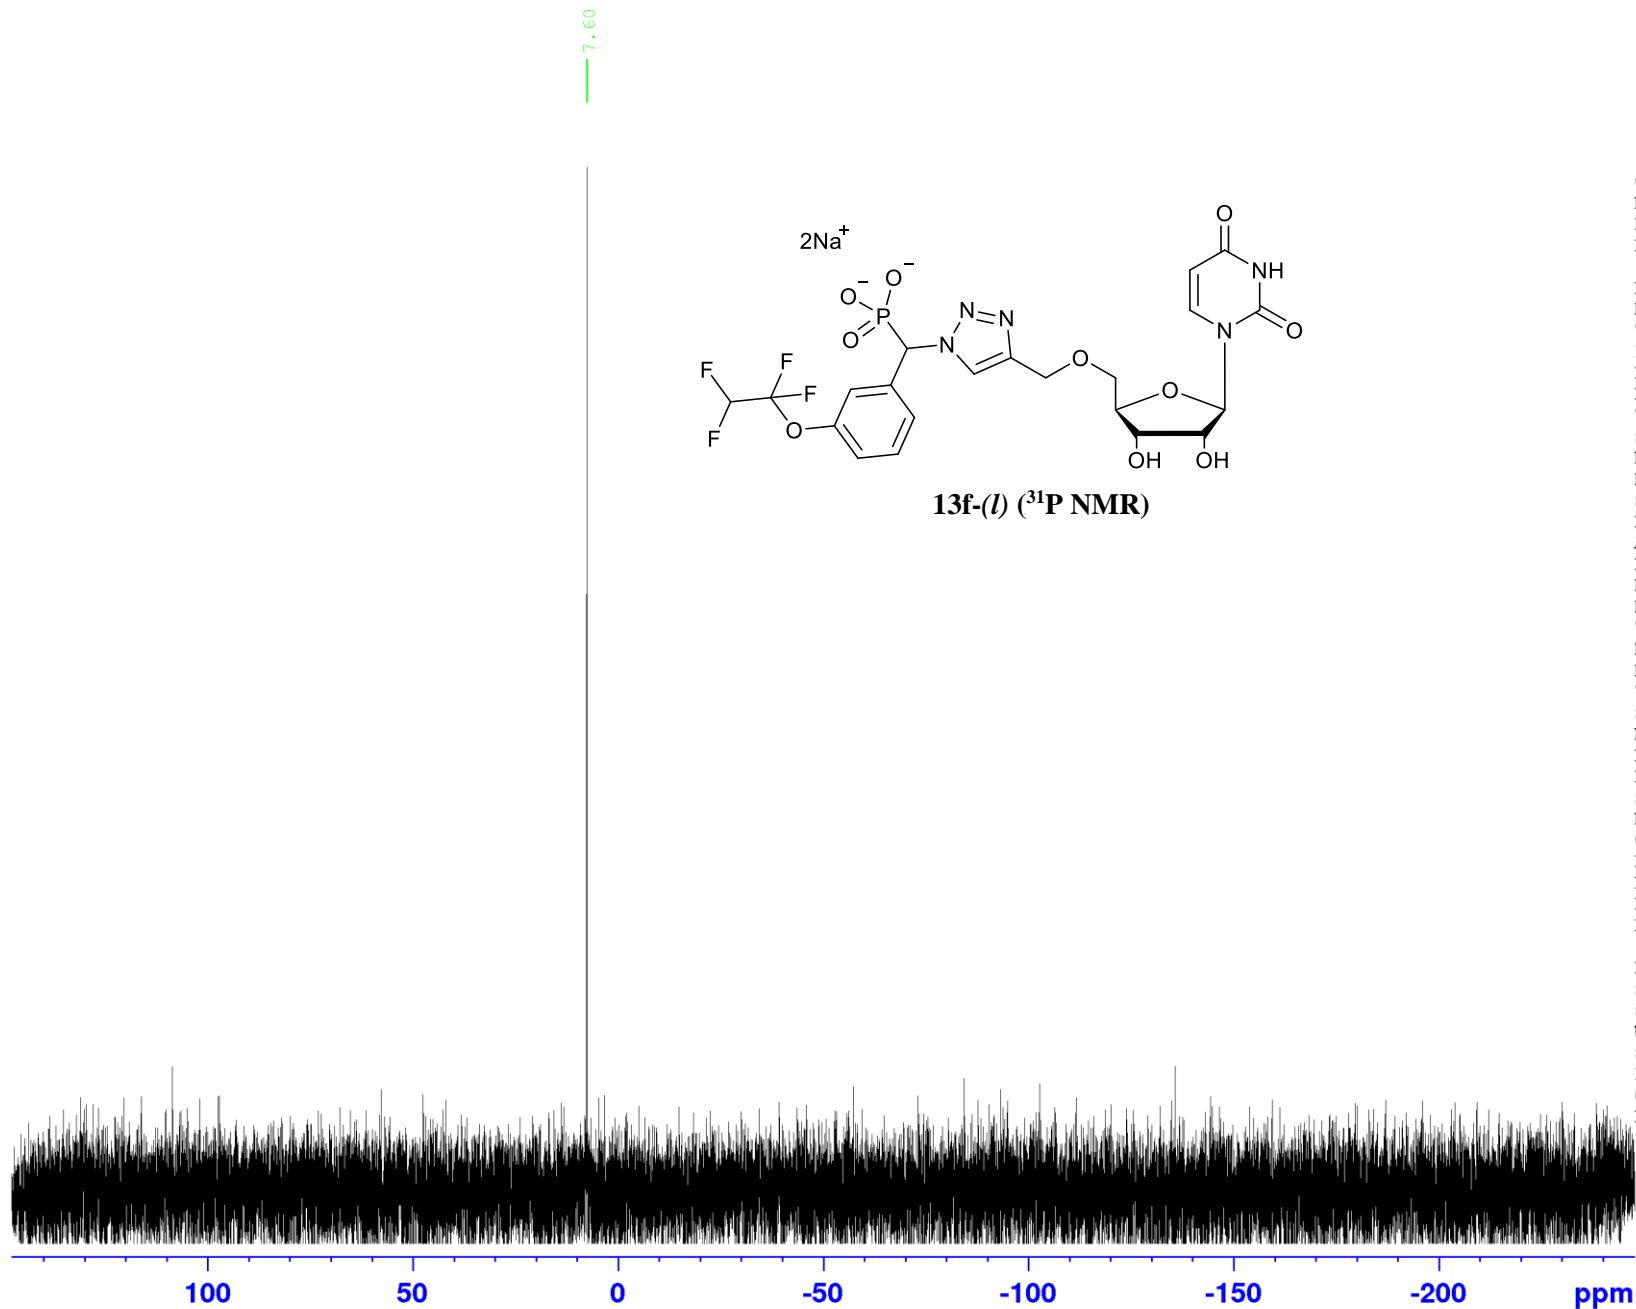

-87.78  
-88.17  
-88.32  
-88.71

-137.59

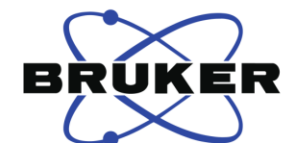

Current Data Parameters  
NAME CD66\_1  
EXPNO 5  
PROCNO 1

F2 - Acquisition Parameters  
Date\_ 20180605  
Time 2.21 h  
INSTRUM spect  
PROBHD Z108618\_0921 (  
PULPROG zgfhigqn.2  
TD 131072  
SOLVENT D2O  
NS 16  
DS 4  
SWH 89285.711 Hz  
FIDRES 1.362392 Hz  
AQ 0.7340032 sec  
RG 196.38  
DW 5.600 usec  
DE 6.50 usec  
TE 298.9 K  
D1 1.00000000 sec  
D11 0.03000000 sec  
D12 0.00002000 sec  
TD0 1  
SFO1 376.4889418 MHz  
NUC1 19F  
P1 15.00 usec  
PLW1 17.75399971 W  
SFO2 400.1616006 MHz  
NUC2 1H  
CPDPRG[2] waltz16  
PCPD2 90.00 usec  
PLW2 11.52400017 W  
PLW12 0.27886000 W

F2 - Processing parameters  
SI 65536  
SF 376.5265944 MHz  
WDW EM  
SSB 0  
LB 0.30 Hz  
GB 0  
PC 1.00

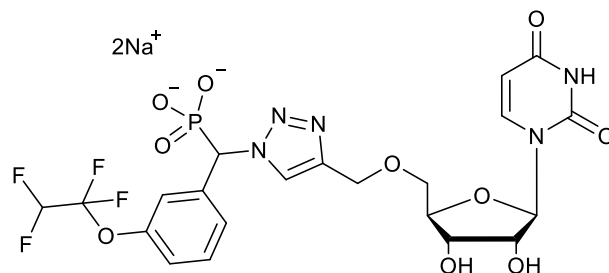

13f-(I) (<sup>19</sup>F NMR)

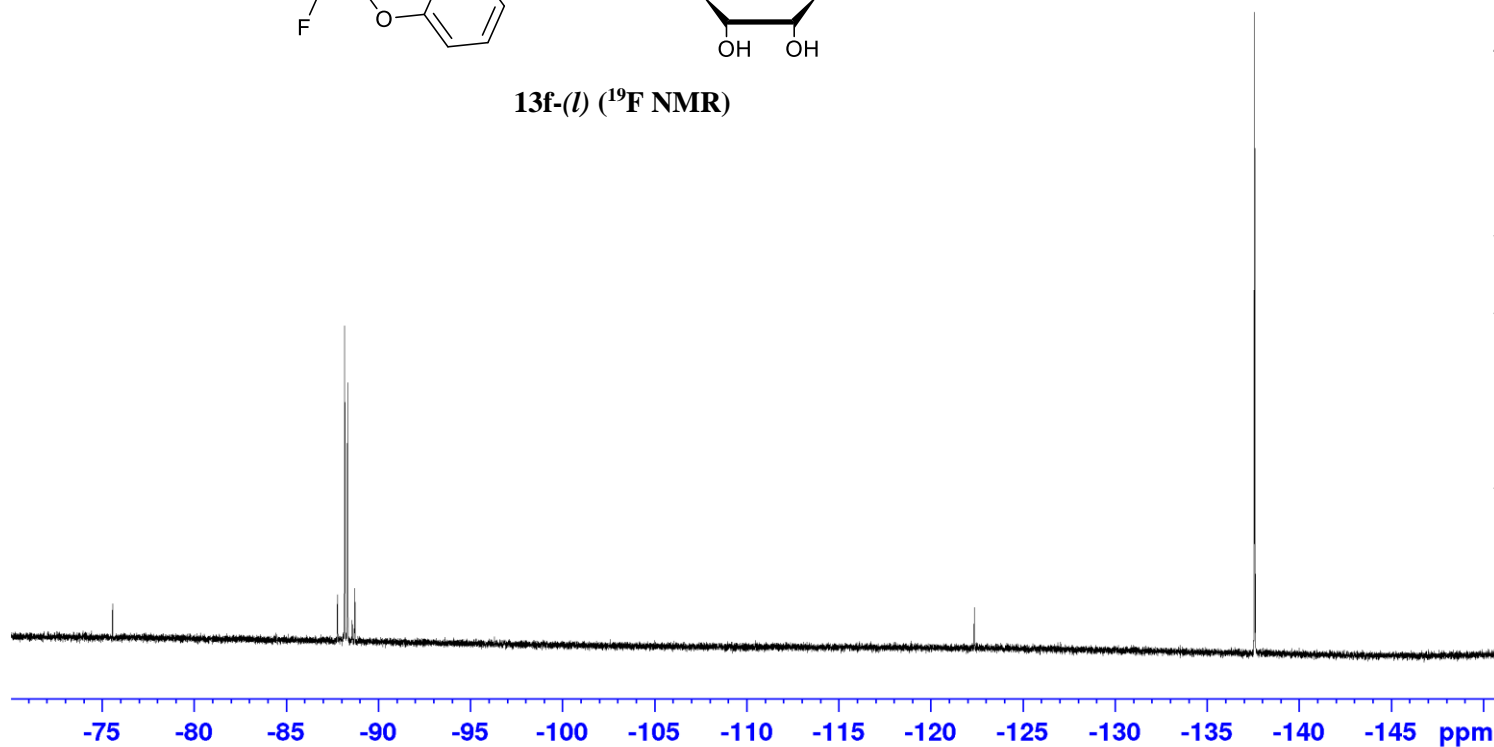

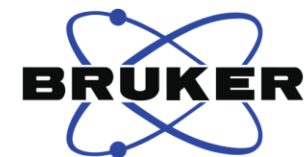

Current Data Parameters  
 NAME CD105s  
 EXPNO 1  
 PROCNO 1

F2 - Acquisition Parameters  
 Date\_ 20200228  
 Time 10.51 h  
 INSTRUM CAB AV4 500 MHZ BASIC  
 PROBHD Z150364\_0005 (   
 PULPROG zg30  
 TD 65536  
 SOLVENT D2O  
 NS 64  
 DS 2  
 SWH 10000.000 Hz  
 FIDRES 0.305176 Hz  
 AQ 3.2767999 sec  
 RG 85.7143  
 DW 50.000 usec  
 DE 16.23 usec  
 TE 286.4 K  
 D1 1.00000000 sec  
 TD0 1  
 SFO1 499.7470859 MHz  
 NUC1 1H  
 P1 12.00 usec  
 PLW1 15.53100014 W

F2 - Processing parameters  
 SI 65536  
 SF 499.7439537 MHz  
 WDW EM  
 SSB 0  
 LB 0.30 Hz  
 GB 0  
 PC 1.00

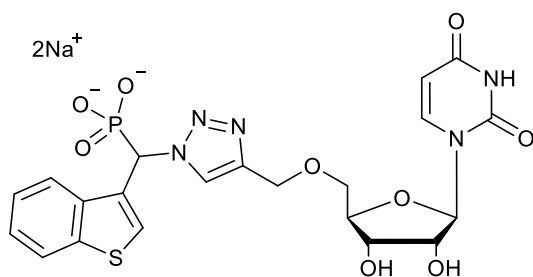

**13g-(s) (<sup>1</sup>H NMR)**

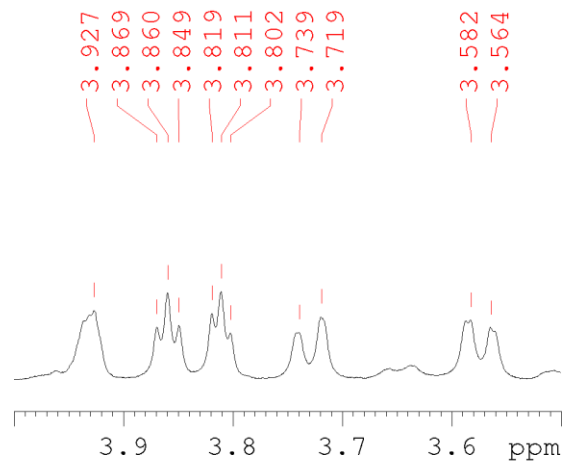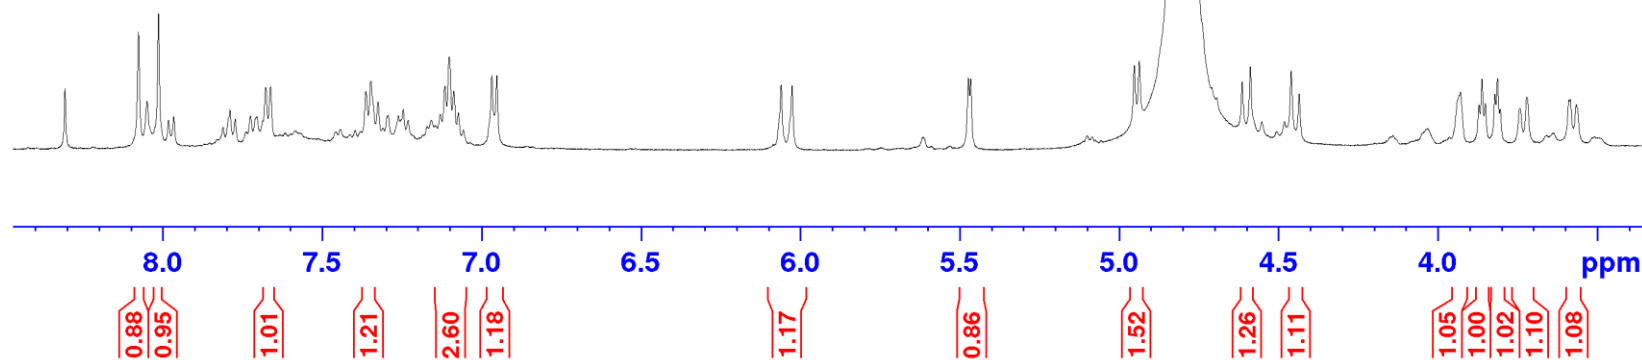

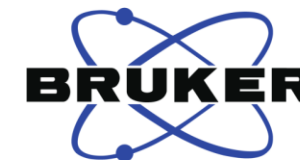

# Current Data Parameters

NAME CD105s  
EXPNO 5  
PROCNO 1

# F2 - Acquisition Parameters

Date\_ 20200228  
Time 21.00 h  
INSTRUM CAB AV4 500 MHZ BASIC  
PROBHD Z150364\_0005 (  
PULPROG zgpg30  
TD 65536  
SOLVENT D2O  
NS 2500  
DS 4  
SWH 30120.482 Hz  
FIDRES 0.919204 Hz  
AQ 1.0878977 sec  
RG 101  
DW 16.600 usec  
DE 18.00 usec  
TE 285.9 K  
D1 2.00000000 sec  
D11 0.03000000 sec  
TD0 1  
SFO1 125.6732948 MHz  
NUC1 13C  
P1 10.00 usec  
PLW1 51.23600006 W  
SFO2 499.7459990 MHz  
NUC2 1H  
CPDPRG[2] waltz16  
PCPD2 80.00 usec  
PLW2 15.53100014 W  
PLW12 0.34944999 W  
PLW13 0.17549001 W

# F2 - Processing parameters

SI 32768  
SF 125.6605781 MHz  
WDW EM  
SSB 0  
LB 1.00 Hz  
GB 0  
PC 1.40

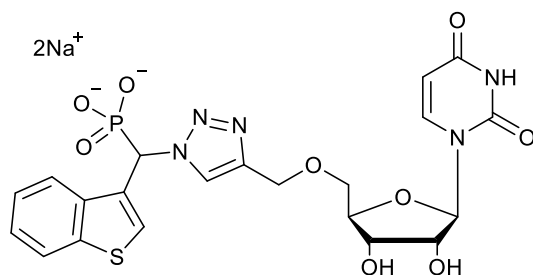

**13g-(s) (<sup>13</sup>C NMR)**

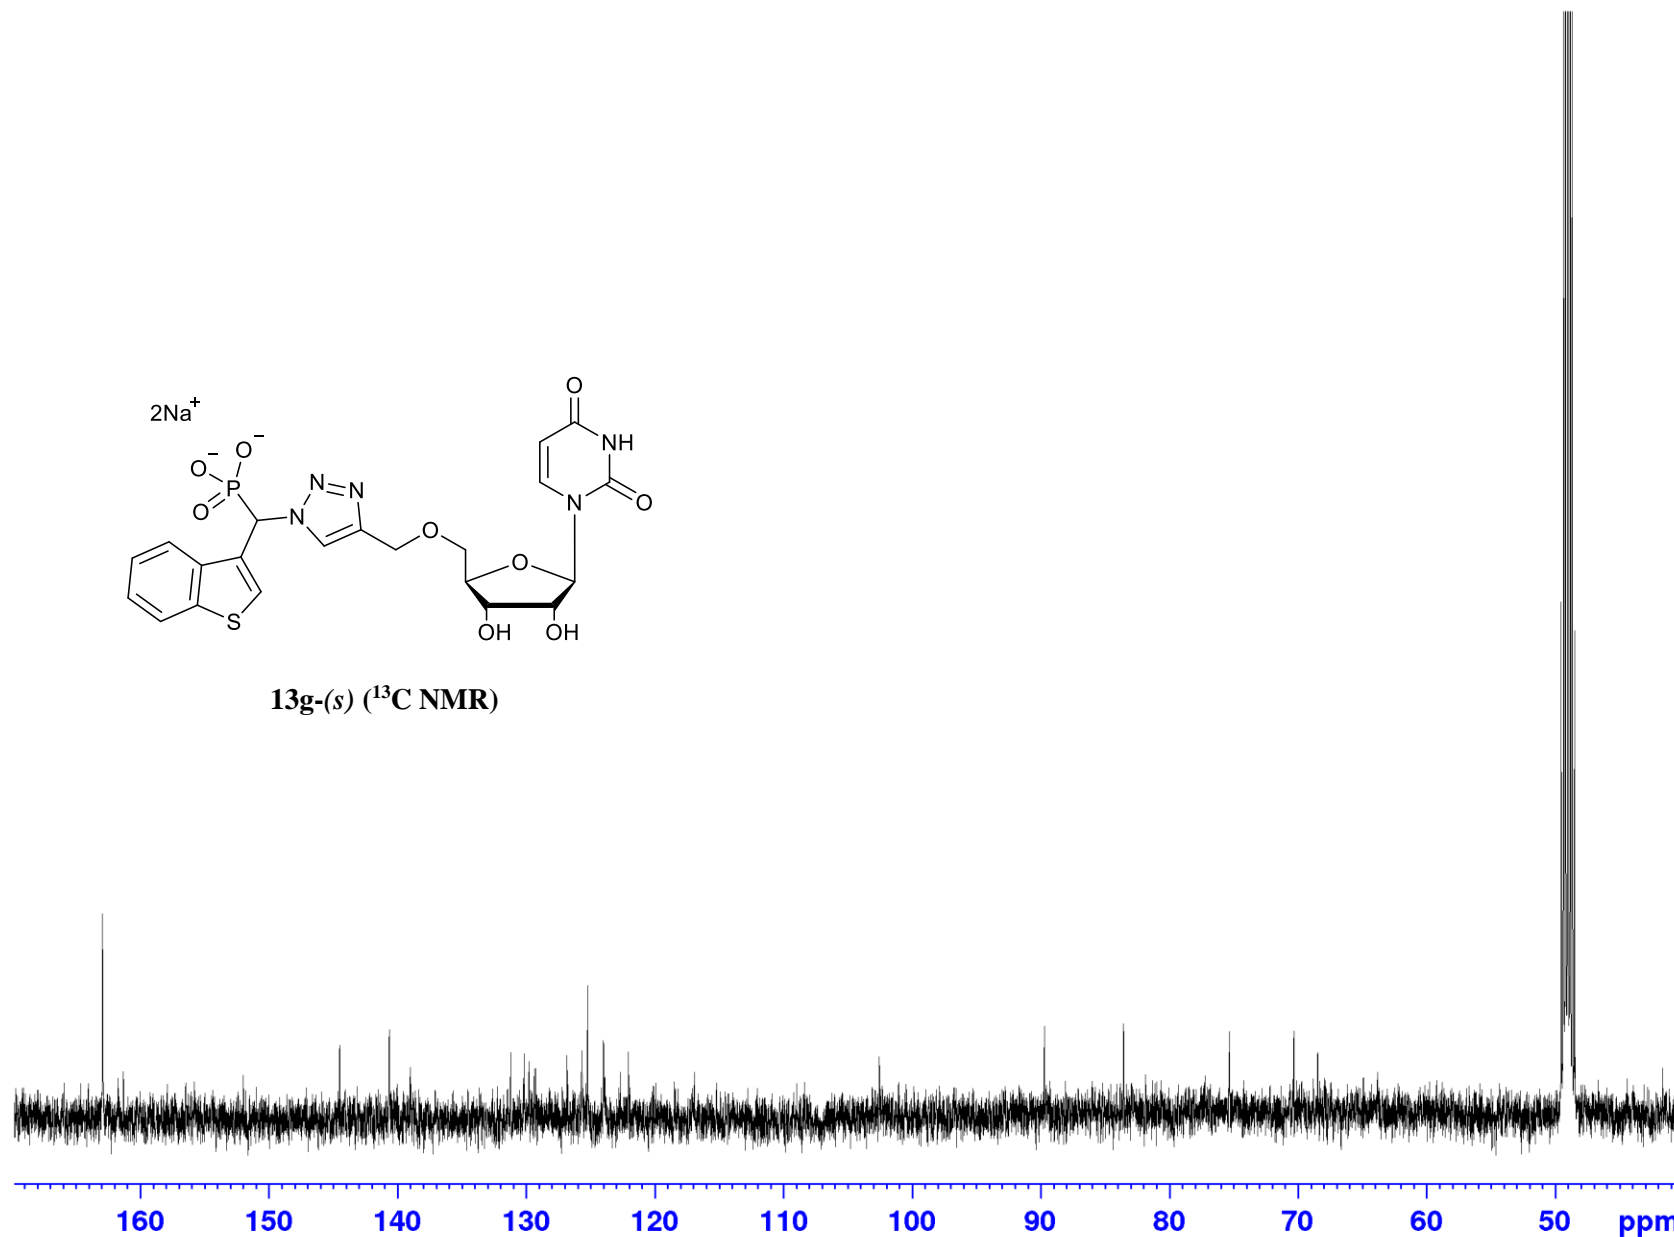

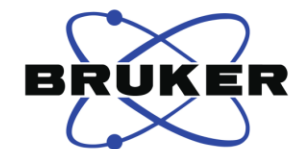

Current Data Parameters  
NAME CD105s  
EXPNO 2  
PROCNO 1

F2 - Acquisition Parameters  
Date\_ 20200228  
Time 10.53 h  
INSTRUM CAB AV4 500 MHZ BASIC  
PROBHD Z150364\_0005 (  
PULPROG zgpg30  
TD 65536  
SOLVENT D2O  
NS 16  
DS 4  
SWH 81967.211 Hz  
FIDRES 2.501441 Hz  
AQ 0.3997696 sec  
RG 101  
DW 6.100 usec  
DE 18.00 usec  
TE 286.4 K  
D1 2.00000000 sec  
D11 0.03000000 sec  
TD0 1  
SF01 202.2899643 MHz  
NUC1 31P  
P1 12.00 usec  
PLW1 45.76100159 W  
SF02 499.7459990 MHz  
NUC2 1H  
CPDPRG[2] waltz16  
PCPD2 80.00 usec  
PLW2 15.53100014 W  
PLW12 0.34944999 W  
PLW13 0.17549001 W

F2 - Processing parameters  
SI 32768  
SF 202.3000793 MHz  
WDW EM  
SSB 0  
LB 1.00 Hz  
GB 0  
PC 1.40

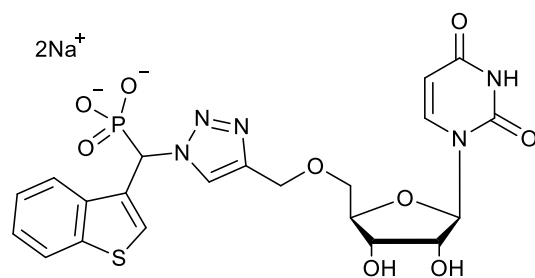

**13g-(s) (<sup>31</sup>P NMR)**

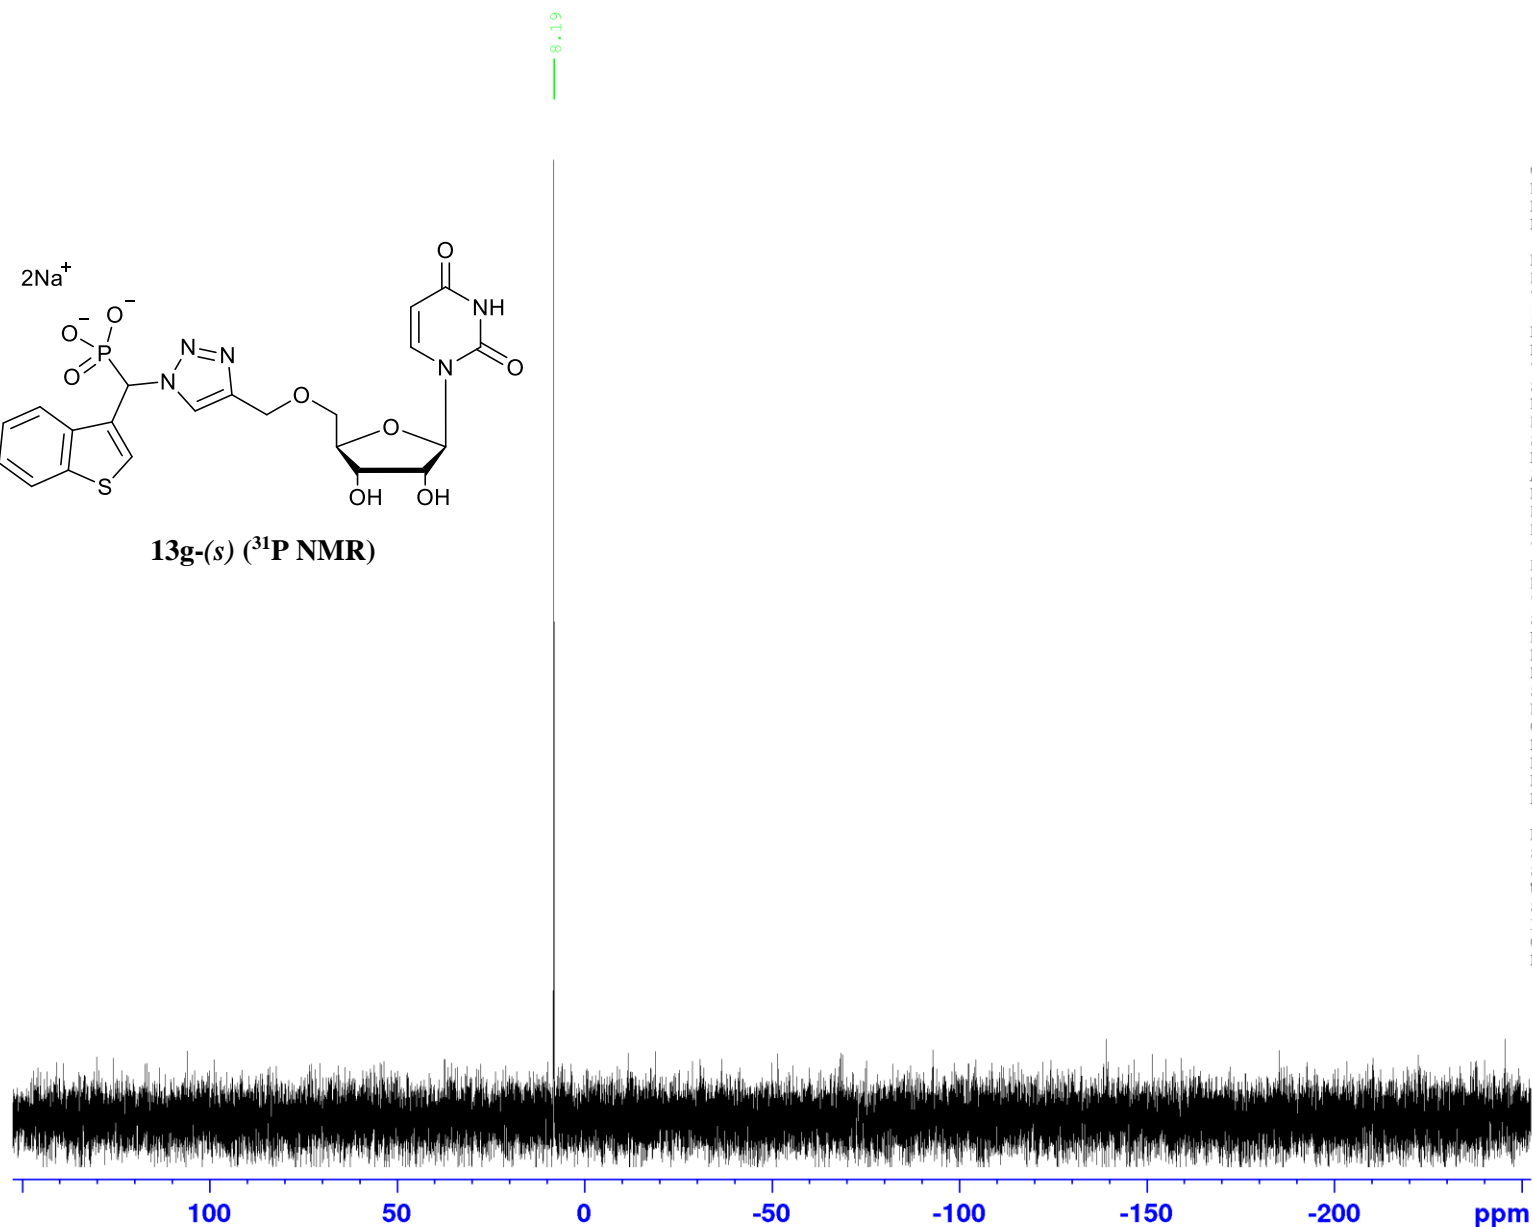

S93

Current Data Parameters  
 NAME cd9\_191210\_29  
 EXPNO 1  
 PROCNO 1

F2 - Acquisition Parameters  
 Date\_ 20191210  
 Time 12.51 h  
 INSTRUM CAB AV4 500 MHZ BASIC  
 PROBHD Z150364\_0005 (   
 PULPROG zg30  
 TD 65536  
 SOLVENT D2O  
 NS 16  
 DS 2  
 SWH 10000.000 Hz  
 FIDRES 0.305176 Hz  
 AQ 3.2767999 sec  
 RG 80  
 DW 50.000 usec  
 DE 16.23 usec  
 TE 298.0 K  
 D1 1.00000000 sec  
 TD0 1  
 SFO1 499.7470859 MHz  
 NUC1 1H  
 P1 12.00 usec  
 PLW1 15.53100014 W

F2 - Processing parameters  
 SI 65536  
 SF 499.7439556 MHz  
 WDW EM  
 SSB 0  
 LB 0.30 Hz  
 GB 0  
 PC 1.00

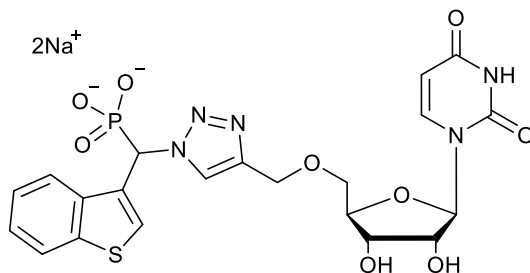

**13g-(l) (<sup>1</sup>H NMR)**

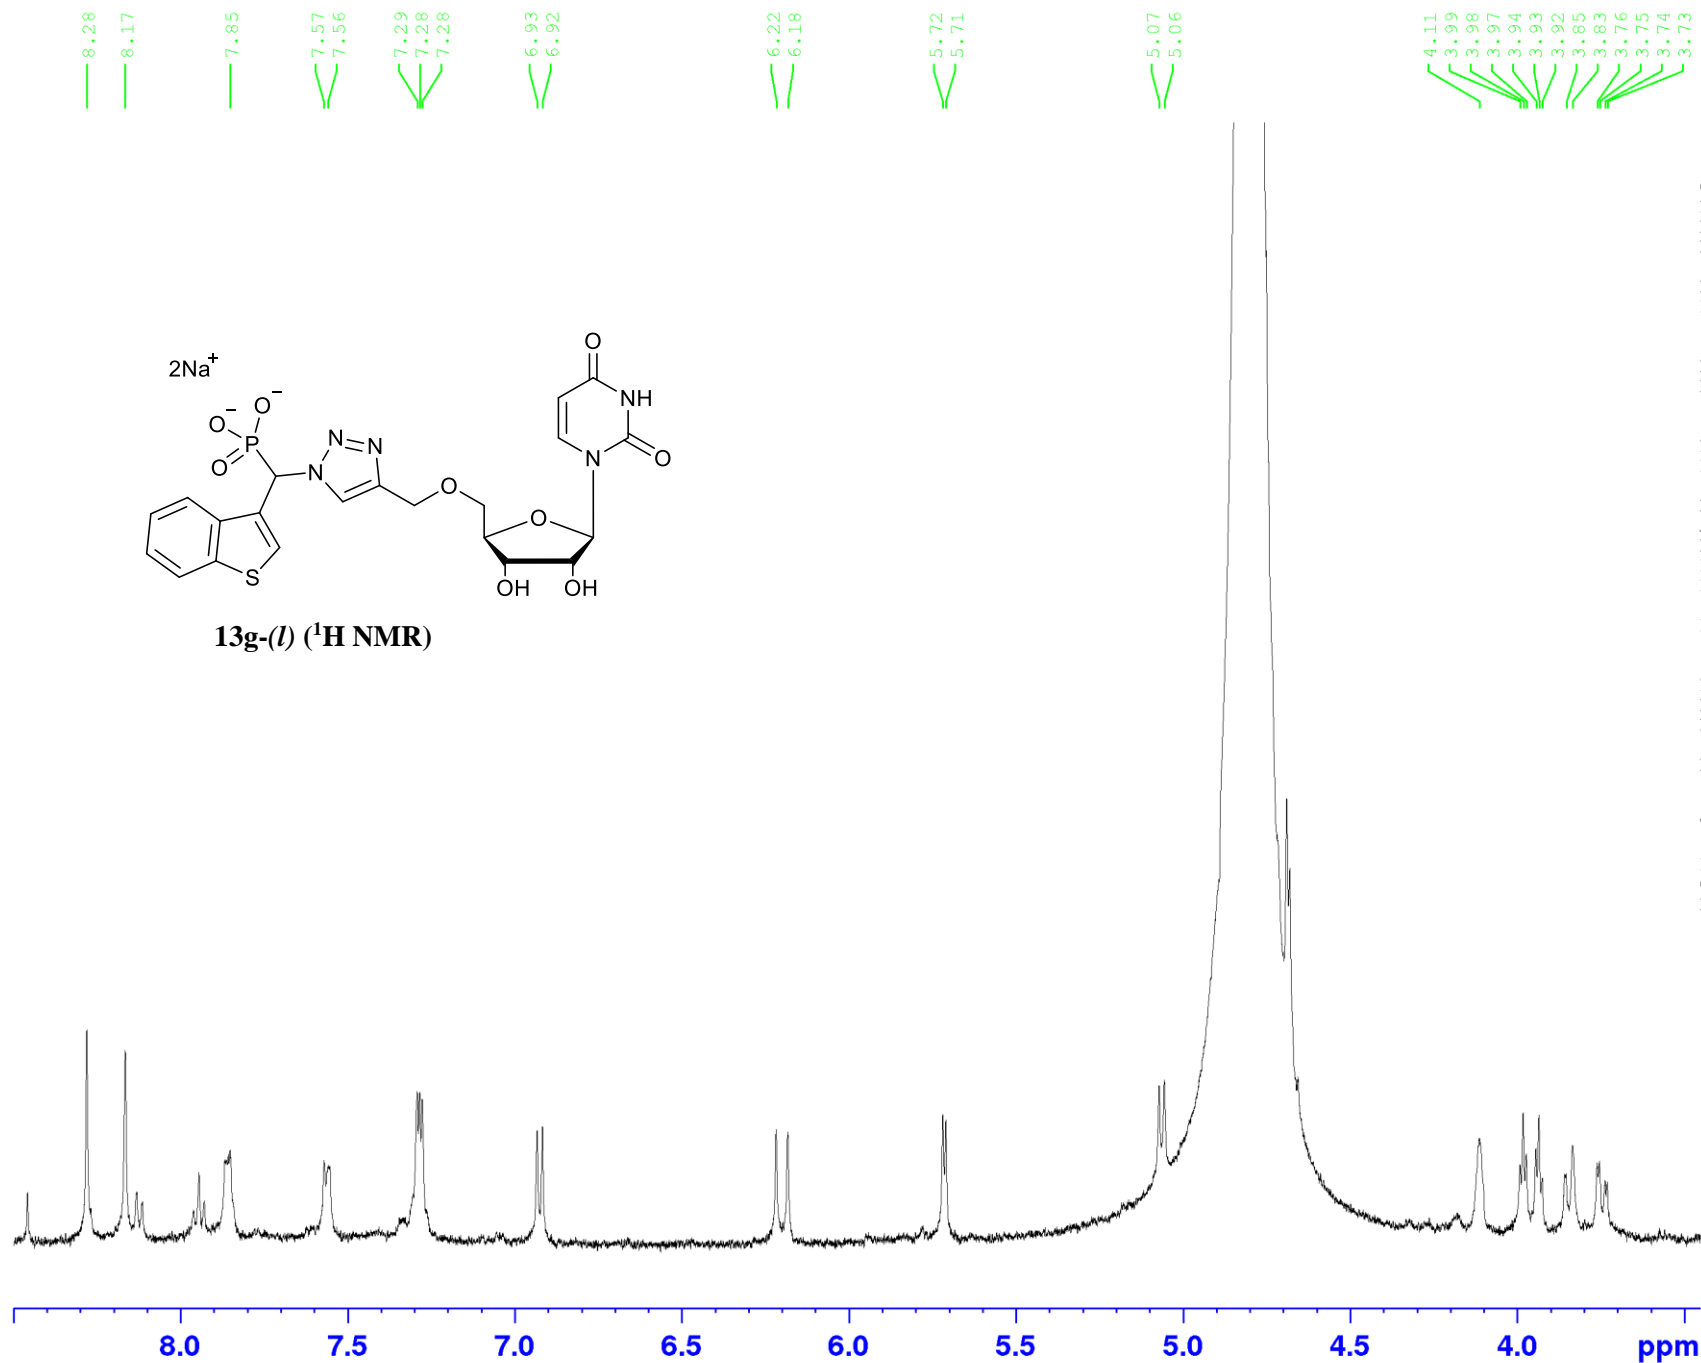

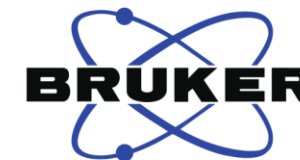

Current Data Parameters

NAME CD1051  
EXPNO 3  
PROCNO 1

F2 - Acquisition Parameters

Date\_ 20191213  
Time 2.21 h  
INSTRUM CAB AV4 500 MHZ BASIC  
PROBHD Z150364\_0005 (  
PULPROG zgpg30  
TD 65536  
SOLVENT D2O  
NS 4500  
DS 4  
SWH 30120.482 Hz  
FIDRES 0.919204 Hz  
AQ 1.0878977 sec  
RG 101  
DW 16.600 usec  
DE 18.00 usec  
TE 298.0 K  
D1 2.00000000 sec  
D11 0.03000000 sec  
TD0 1  
SFO1 125.6732948 MHz  
NUC1 13C  
P1 10.00 usec  
PLW1 51.23600006 W  
SFO2 499.7459990 MHz  
NUC2 1H  
CPDPRG[2] waltz16  
PCPD2 80.00 usec  
PLW2 15.53100014 W  
PLW12 0.34944999 W  
PLW13 0.17549001 W

F2 - Processing parameters

SI 32768  
SF 125.6605694 MHz  
WDW EM  
SSB 0  
LB 1.00 Hz  
GB 0  
PC 1.40

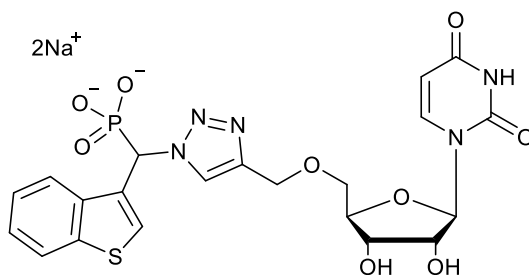

13g-(I) (<sup>13</sup>C NMR)

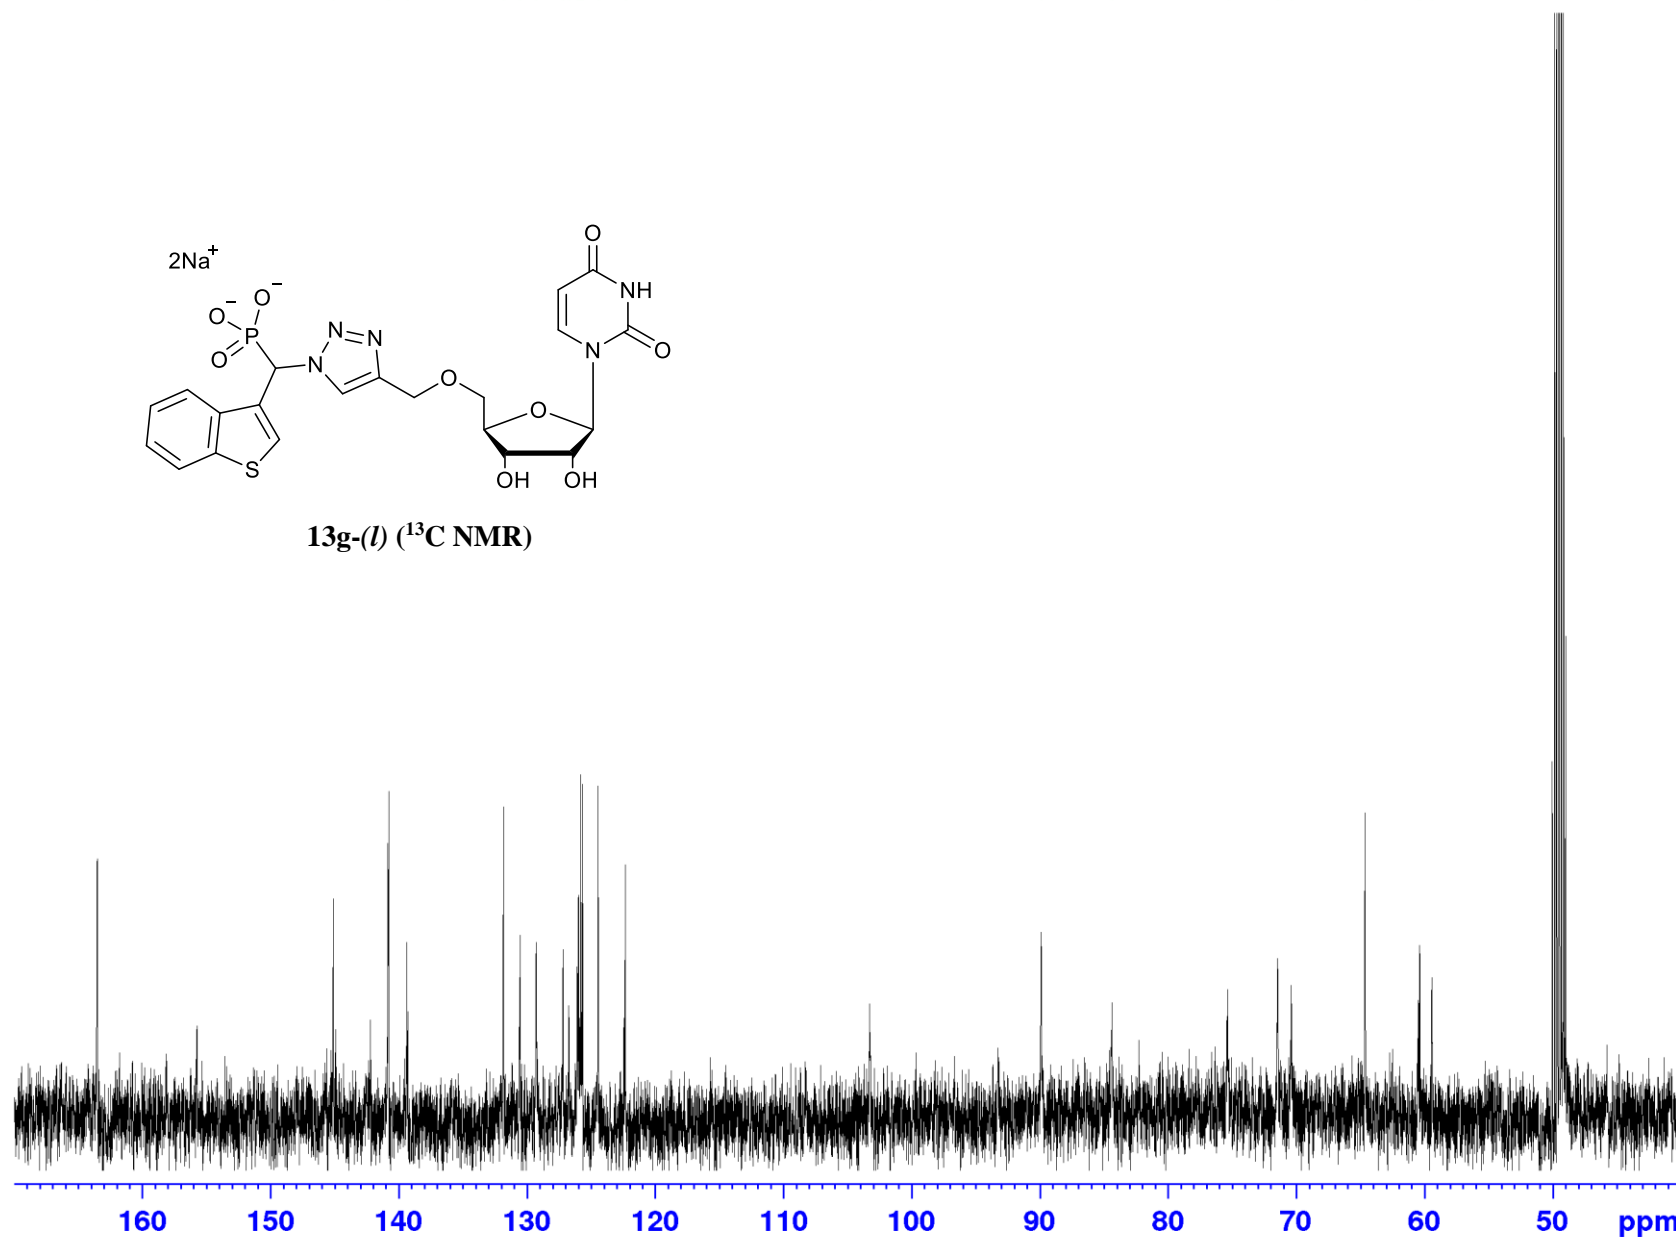

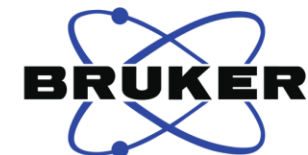

Current Data Parameters  
NAME cd9\_191210\_29  
EXPNO 6  
PROCNO 1

F2 - Acquisition Parameters  
Date\_ 20191211  
Time 1.23 h  
INSTRUM CAB AV4 500 MHZ BASIC  
PROBHD Z150364\_0005 (  
PULPROG zgpg30  
TD 65536  
SOLVENT D2O  
NS 16  
DS 4  
SWH 81967.211 Hz  
FIDRES 2.501441 Hz  
AQ 0.3997696 sec  
RG 101  
DW 6.100 usec  
DE 18.00 usec  
TE 298.0 K  
D1 2.00000000 sec  
D11 0.03000000 sec  
TD0 1  
SFO1 202.2899643 MHz  
NUC1 31P  
P1 12.00 usec  
PLW1 45.76100159 W  
SFO2 499.7459990 MHz  
NUC2 1H  
CPDPRG2 waltz16  
PCPD2 80.00 usec  
PLW2 15.53100014 W  
PLW12 0.34944999 W  
PLW13 0.17549001 W

F2 - Processing parameters  
SI 32768  
SF 202.3000793 MHz  
WDW EM  
SSB 0  
LB 1.00 Hz  
GB 0  
PC 1.40

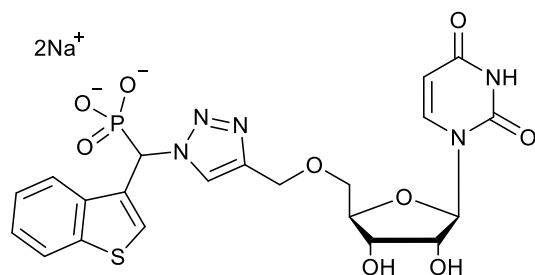

13g-(I) (<sup>31</sup>P NMR)

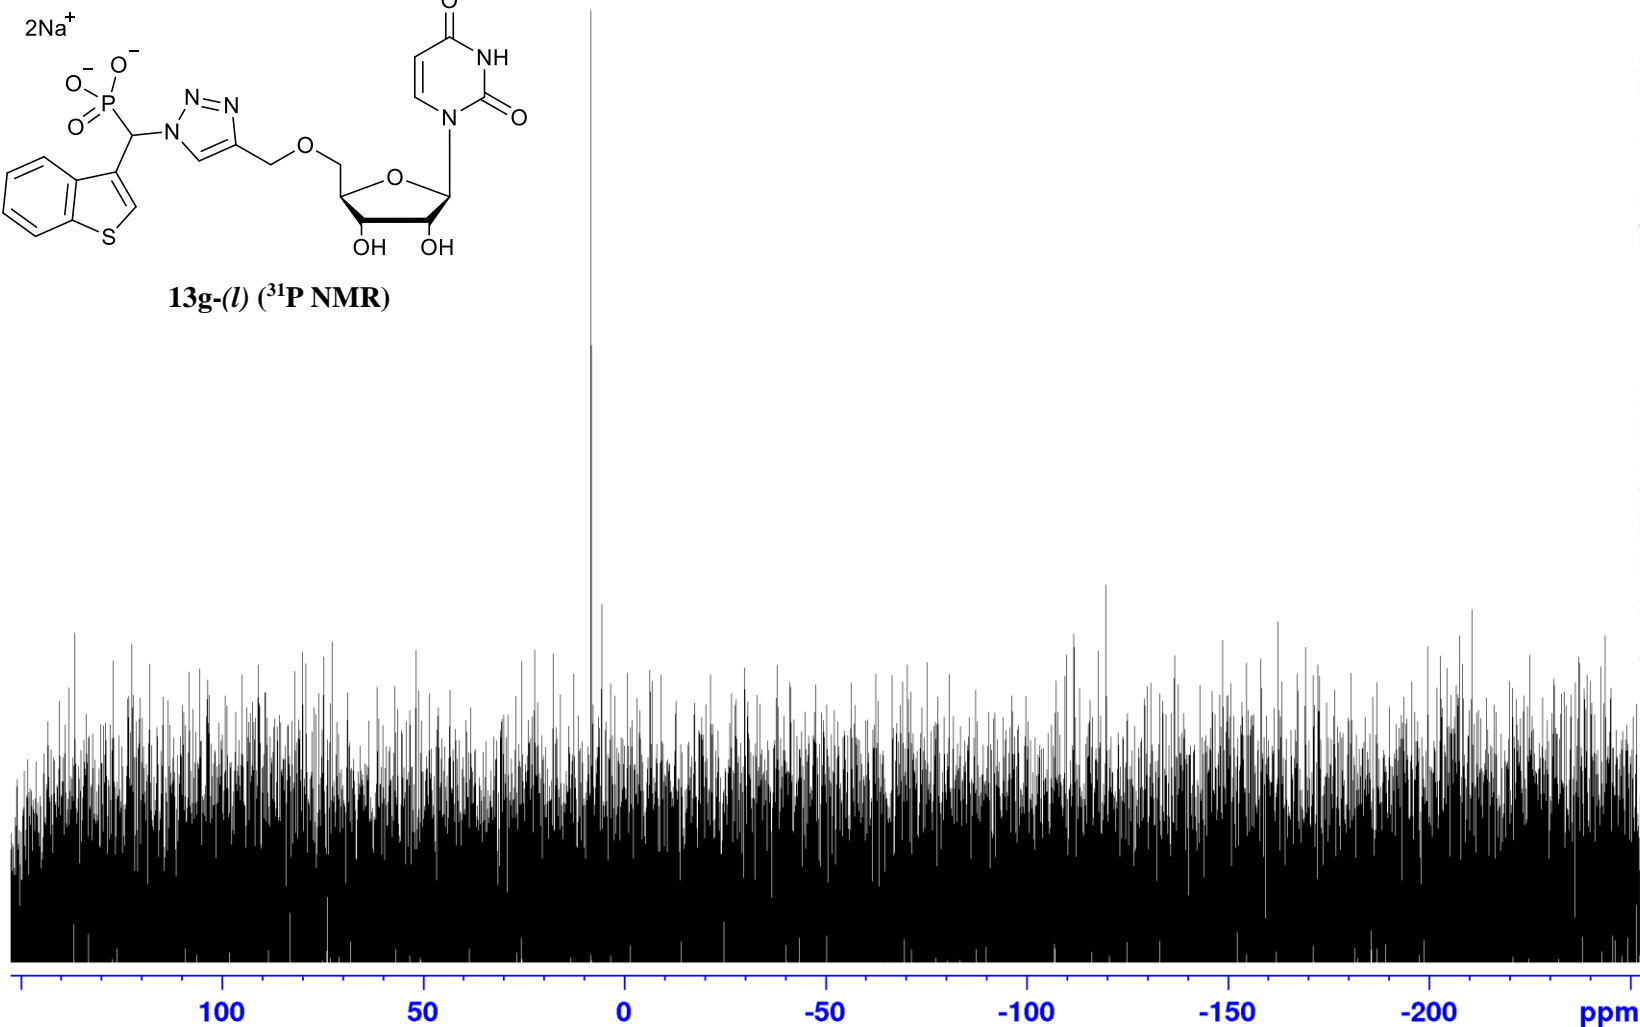

Supplement: d1md00079a1.pdf [file d1md00079a1.pdf]
